# Supplementary material for: Evolutionary Insights into the Envelope Protein of SARS-CoV-2
Source: Preprints.org preprint supplement (doi:10.20944/preprints202008.0665.v1), 2020-08-30
Supplement: Supplementary file 1 [file supplementary]

## Sheet: Supplementary Data 1
Data Information					Nonsynonimous mutation information
																															Nucleotide_mutation_information									Primer and Probe sites mutation informations
																											Strains contains more than one mutation
Sequence_ID		Country	Sequence_number		aa-Mutated_Sequence_ID	aa_Mutation		aa_Mutated_strains	aa_Mutation_number_in_a_strain		Country	aa_Mutatd_sequence_number		aa_Mutation	Frequency		Unique_aa_mutation		Unique-aa_position_mutation	Number_of_aa_variation		position	k	n	Wu-kabat Variability coefficient = (N*k)/n		Strains	aa_Mutation			Sequence_ID	Nucleotide_Mutation		Sequence_ID	Frequency_of_Nucleotide_mutation		Nucleotide_mutation	Frequency		Charité, Germany	Forward
Severe_acute_respiratory_syndrome_coronavirus_2_isolate_Wuhan-Hu-1_(NC_045512.2)		England	23449		hCoV-19/Wales/PHWC-165B43/2020|EPI_ISL_490770|2020-06-17	Y2H		hCoV-19/Morocco/RA85/2020|EPI_ISL_467299|2020-05-21	4		England	354		S68F	205		Y2H		72	6		1	1	81818	1		hCoV-19/Morocco/RA85/2020|EPI_ISL_467299|2020-05-21	C43R			Wales/PHWC-165B43/2020|EPI_ISL_490770|2020-06-17	T4C		Morocco/RA85/2020|EPI_ISL_467299|2020-05-21	7		C12T	221		Country	Accession No.	Within primer mutation	Countries
India/InStem_NCBS_0075/2020|EPI_ISL_479746|2020-06-17		USA	18007		hCoV-19/Wales/PHWC-165F56/2020|EPI_ISL_490818|2020-06-13	Y2H		hCoV-19/Scotland/CVR2552/2020|EPI_ISL_484601|2020-04-15	2		USA	112		L73F	100		F4L		5	4		2	2	81815	2.00007		hCoV-19/Morocco/RA85/2020|EPI_ISL_467299|2020-05-21	C44Y			Wales/PHWC-165F56/2020|EPI_ISL_490818|2020-06-13	T4C		England/NORT-29DD4B/2020|EPI_ISL_484316|2020-05-07	2		C203T	205		Sierra_Leone	2020|EPI_ISL_512820|2020-04-14	C26T	USA
India/InStem_NCBS_0035/2020|EPI_ISL_477236|2020-06-16		Wales	5482		hCoV-19/England/20189121801/2020|EPI_ISL_465545|2020-05-01	Y2H		hCoV-19/Scotland/CVR2937/2020|EPI_ISL_438999|2020-04-22	2		Scotland	103		R69I	88		V5I		7	3		3	1	81818	1		hCoV-19/Morocco/RA85/2020|EPI_ISL_467299|2020-05-21	N45R			England/20189121801/2020|EPI_ISL_465545|2020-05-01	T4C		Scotland/CVR2552/2020|EPI_ISL_484601|2020-04-15	2		C217T	99		USA	2020|EPI_ISL_487219|2020-04-25	G28T	England
India/InStem_NCBS_0022/2020|EPI_ISL_477224|2020-06-11		Scotland	5205		hCoV-19/Spain/COV001443/2020|EPI_ISL_467115|2020-03-17	F4L		hCoV-19/England/CAMB-7D2EA/2020|EPI_ISL_441590|2020-04-06	2		Wales	88		P71L	59		V5F		8	3		4	2	81817	2.00002		hCoV-19/Morocco/RA85/2020|EPI_ISL_467299|2020-05-21	V47G			Australia/NSW621/2020|EPI_ISL_490030|2020-05-31	C6T		Scotland/CVR2937/2020|EPI_ISL_438999|2020-04-22	2		G206T	88		USA	2020|EPI_ISL_436908|2020-04-08	G29T	India
India/InStem_NCBS_0011/2020|EPI_ISL_477214|2020-06-07		Australia	2814		hCoV-19/Canada/BC_21355315/2020|EPI_ISL_477023|2020-04	V5I		hCoV-19/Israel/CVL-n26112/2020|EPI_ISL_514285|2020-07-20	2		Netherlands	39		S55F	40		V5A		24	3		5	5	81805	5.00079		hCoV-19/Scotland/CVR2552/2020|EPI_ISL_484601|2020-04-15	T9I			Germany/BE-RKI-Z-0023/2020|EPI_ISL_483156|2020-04-27	A9C		England/CAMB-7D2EA/2020|EPI_ISL_441590|2020-04-06	2		C96T	59		USA	2020|EPI_ISL_470685|2020-04-13	T30C	Scotland
Australia/WA27/2020|EPI_ISL_470844|2020-03-04		Spain	2680		hCoV-19/Canada/BC_19196568/2020|EPI_ISL_469220|2020-04	V5I		hCoV-19/Sierra_Leone/KGH-G-8669/2020|EPI_ISL_512820|2020-04-14	2		Spain	33		V62F	39		V5L		37	3		6	2	81817	2.00002		hCoV-19/Scotland/CVR2552/2020|EPI_ISL_484601|2020-04-15	G10C			England/20109093806/2020|EPI_ISL_417287|2020-03-06	C12T		Sweden/20-52052/2020|EPI_ISL_510870|2020-06-04	2		C212T	59		USA	2020|EPI_ISL_470703|2020-04-13	A31G	Wales
Oman/205027556/2020|EPI_ISL_458125|2020-04-08		India	2165		hCoV-19/England/SHEF-C4AEC/2020|EPI_ISL_479211|2020-06-02	V5F		hCoV-19/England/NORT-291FF6/2020|EPI_ISL_489065|2020-05-07	2		Sweden	26		T9I	38		S6L		43	3		7	4	81814	4.0002		hCoV-19/Scotland/CVR2937/2020|EPI_ISL_438999|2020-04-22	T9I			USA/UT-02051/2020|EPI_ISL_470669|2020-04-20	C12T		Sweden/20-51746/2020|EPI_ISL_510843|2020-05-22	2		C69T	46		USA	2020|EPI_ISL_482436|2020-05-15	G33T
Australia/WA18/2020|EPI_ISL_470836|2020-04-08		Portugal	1650		hCoV-19/USA/FL-BPHL-0327/2020|EPI_ISL_489736|2020-04-17	V5I		hCoV-19/England/LIVE-A065B/2020|EPI_ISL_472124|2020-05-27	2		India	22		L21F	32		E7K		52	3		8	4	81811	4.00034		hCoV-19/Scotland/CVR2937/2020|EPI_ISL_438999|2020-04-22	G10C			USA/UT-01870/2020|EPI_ISL_470694|2020-04-13	C12T		Israel/CVL-n26112/2020|EPI_ISL_514285|2020-07-20	2		A189G	43		England	2020|EPI_ISL_457174|2020-04-10	A36G
Australia/WA40/2020|EPI_ISL_470857|2020-03-21		Netherlands	1589		hCoV-19/Canada/BC_19803546/2020|EPI_ISL_469223|2020-04	V5I		hCoV-19/Northern_Ireland/NIRE-106ACF/2020|EPI_ISL_501013|2020-05-19	2		Canada	19		T30I	29		E7Q		58	3		9	2	81780	2.00093		hCoV-19/England/CAMB-7D2EA/2020|EPI_ISL_441590|2020-04-06	G10V			USA/UT-02573/2020|EPI_ISL_487219|2020-04-25	C12T		Scotland/CVR3890/2020|EPI_ISL_484675|2020-06-15	2		C164T	40		USA	2020|EPI_ISL_470548|2020-04-21	A36T
Kenya/P1350/2020|EPI_ISL_457862|2020-04-20		South_Africa	1121		hCoV-19/Wales/PHWC-3175C/2020|EPI_ISL_446481|2020-04-13	V5I		hCoV-19/Netherlands/NA_640/2020|EPI_ISL_461075|2020-05-03	2		Australia	17		V24M	26		E7D		61	3		10	3	81814	3.00015		hCoV-19/England/CAMB-7D2EA/2020|EPI_ISL_441590|2020-04-06	S55F			Wales/PHWC-28855/2020|EPI_ISL_432035|2020-04-01	C12T		Wales/PHWC-339BE/2020|EPI_ISL_446774|2020-04-20	2		G184T	39		USA	2020|EPI_ISL_470701|2020-04-13	A37G
Kenya/S338/2020|EPI_ISL_457936|2020-03-29		Canada	1104		hCoV-19/Canada/BC_21358214/2020|EPI_ISL_477024|2020-04	V5I		hCoV-19/Wales/PHWC-165B43/2020|EPI_ISL_490770|2020-06-17	1		South_Africa	13		V75L	22		E8D		68	3		11	2	81817	2.00002		hCoV-19/Israel/CVL-n26112/2020|EPI_ISL_514285|2020-07-20	S16G			Turkey/HSGM-515/2020|EPI_ISL_437308|2020-03-25	C12T		Sierra_Leone/KGH-G-8669/2020|EPI_ISL_512820|2020-04-14	2		C26T	38		England	2020|EPI_ISL_457169|2020-04-09	T42C
India/RMRC104/2020|EPI_ISL_455750|2020-05-06		Belgium	976		hCoV-19/Egypt/HCoV2-Egy-002/2020|EPI_ISL_510532|2020-06-02	V5F		hCoV-19/Wales/PHWC-165F56/2020|EPI_ISL_490818|2020-06-13	1		Wuhan	13		V58F	20		E8G		70	3		12	2	81817	2.00002		hCoV-19/Israel/CVL-n26112/2020|EPI_ISL_514285|2020-07-20	L51V			USA/UT-0531/2020|EPI_ISL_435365|2020-04-03	C12T		Canada/BC_09025513/2020|EPI_ISL_477109|2020-04	2		C61T	32		India	2020|EPI_ISL_471631|2020-06-01	A46G
USA/WA-UW-690/2020|EPI_ISL_476934|2020-03-13		Switzerland	938		hCoV-19/Brazil/RJ-DCVN5/2020|EPI_ISL_510536|2020-07-20	V5A		hCoV-19/England/20189121801/2020|EPI_ISL_465545|2020-05-01	1		Israel	12		D72H	20		E8K		71	3		13	2	81817	2.00002		hCoV-19/Sierra_Leone/KGH-G-8669/2020|EPI_ISL_512820|2020-04-14	L19F			USA/UT-01842/2020|EPI_ISL_470684|2020-04-13	C12T		Canada/BC_20367856/2020|EPI_ISL_477022|2020-04	2		C89T	29		Scotland	2020|EPI_ISL_439234|2020-04-24	G47A
USA/WA-UW-3973/2020|EPI_ISL_430896|2020-03-29		Northern_Ireland	847		hCoV-19/Brazil/RJ-DCVN4/2020|EPI_ISL_510541|2020-07-20	V5A		hCoV-19/Spain/COV001443/2020|EPI_ISL_467115|2020-03-17	1		Japan	10		S68C	15		T9I		10	2		14	1	81818	1		hCoV-19/Sierra_Leone/KGH-G-8669/2020|EPI_ISL_512820|2020-04-14	V62F			USA/UT-02424/2020|EPI_ISL_470674|2020-04-21	C12T		Canada/BC_10601268/2020|EPI_ISL_477116|2020-04	2		G70A	26		Scotland	2020|EPI_ISL_493899|2020-05-04	C48T
USA/WA-UW281/2020|EPI_ISL_418066|2020-03-14		Singapore	814		hCoV-19/USA/WI-UW-897/2020|EPI_ISL_509899|2020-07-12	V5I		hCoV-19/Canada/BC_21355315/2020|EPI_ISL_477023|2020-04	1		Brazil	9		F20I	13		G10C		16	2		15	1	81818	1		hCoV-19/England/NORT-291FF6/2020|EPI_ISL_489065|2020-05-07	T30I			USA/UT-05811/2020|EPI_ISL_483032|2020-05-11	C12T		Canada/BC_09023420/2020|EPI_ISL_477108|2020-04	2		C220T	25		Wales	2020|EPI_ISL_472608|2020-05-05	G49T
India/InStem_NCBS_0004/2020|EPI_ISL_477207|2020-05-29		Brazil	786		hCoV-19/Egypt/Army-MCL001/2020|EPI_ISL_510526|2020-06-01	V5F		hCoV-19/Canada/BC_19196568/2020|EPI_ISL_469220|2020-04	1		Switzerland	7		P71S	13		G10V		17	2		16	3	81812	3.00022		hCoV-19/England/NORT-291FF6/2020|EPI_ISL_489065|2020-05-07	S50I			USA/UT-04839/2020|EPI_ISL_470567|2020-04-21	C12T		Canada/BC_07917795/2020|EPI_ISL_477100|2020-04	2		G195T	22		USA	2020|EPI_ISL_436935|2020-04-14	T50C
USA/WA-UW-3269/2020|EPI_ISL_491015|2020-03-27		Denmark	733		hCoV-19/Switzerland/190016_541_E4/2020|EPI_ISL_500881|2020-07-06	V5L		hCoV-19/England/SHEF-C4AEC/2020|EPI_ISL_479211|2020-06-02	1		Portugal	6		A41S	10		T11A		19	2		17	3	81816	3.00007		hCoV-19/England/LIVE-A065B/2020|EPI_ISL_472124|2020-05-27	T30I			USA/UT-01878/2020|EPI_ISL_470700|2020-04-13	C12T		Canada/BC_10600634/2020|EPI_ISL_477115|2020-04	2		G223C	22
USA/MO-WUSTL033/2020|EPI_ISL_467301|2020-06-08		Japan	628		hCoV-19/Canada/ON_VIDO-01/2020|EPI_ISL_413015|2020-01-23	S6L		hCoV-19/USA/FL-BPHL-0327/2020|EPI_ISL_489736|2020-04-17	1		Argentina	6		V49L	9		L12F		20	2		18	2	81815	2.00007		hCoV-19/England/LIVE-A065B/2020|EPI_ISL_472124|2020-05-27	S55F			England/BRIS-128C85/2020|EPI_ISL_458901|2020-04-14	C12T		Canada/BC_09021025/2020|EPI_ISL_477107|2020-04	2		T57G	21			Reverse
Philippines/PGC02/2020|EPI_ISL_434554|2020-03-26		South_Korea	618		hCoV-19/Israel/CVL-n-7920/2020|EPI_ISL_475007|2020-04-13	E7K		hCoV-19/Canada/BC_19803546/2020|EPI_ISL_469223|2020-04	1		Belgium	5		R69K	9		I13V		21	2		19	3	81814	3.00015		hCoV-19/Northern_Ireland/NIRE-106ACF/2020|EPI_ISL_501013|2020-05-19	V49L			England/CAMB-1ACE38/2020|EPI_ISL_489437|2020-04-22	C12T		Canada/BC_10600259/2020|EPI_ISL_477114|2020-04	2		G222T	21		Austria	2020|EPI_ISL_475803|2020-04-03	G121T	Austria
Bangladesh/BCSIR-NILMRC_071/2020|EPI_ISL_466692|2020-05-26		Sweden	601		hCoV-19/USA/WA-S165/2020|EPI_ISL_430203|2020-03-18	E7Q		hCoV-19/Wales/PHWC-3175C/2020|EPI_ISL_446481|2020-04-13	1		Denmark	5		T30A	8		S16N		22	2		20	3	81804	3.00051		hCoV-19/Northern_Ireland/NIRE-106ACF/2020|EPI_ISL_501013|2020-05-19	V70A			USA/UT-01572/2020|EPI_ISL_449821|2020-04-07	C12T		Canada/BC_09040534/2020|EPI_ISL_477113|2020-04	2		G172T	20		Scotland	2020|EPI_ISL_439312|2020-04-28	C122T	Scotland
Hangzhou/ZJU-06/2020|EPI_ISL_416047|2020-02-02		Iceland	595		hCoV-19/Austria/Graz-MUG7/2020|EPI_ISL_437203|2020-04-06	E7D		hCoV-19/Canada/BC_21358214/2020|EPI_ISL_477024|2020-04	1		Iceland	5		N66T	8		S16G		27	2		21	3	81785	3.00121		hCoV-19/Netherlands/NA_640/2020|EPI_ISL_461075|2020-05-03	S55F			USA/OR-PROV-188/2020|EPI_ISL_482436|2020-05-15	C12T		Canada/BC_09009433/2020|EPI_ISL_477105|2020-04	2		G214C	20		USA	2020|EPI_ISL_449817|2020-04-07	G123A	USA
Wuhan/WHUH003/2020|EPI_ISL_449478|2020-01-22		France	549		hCoV-19/Sweden/20-51167/2020|EPI_ISL_450832|2020-05-04	E7K		hCoV-19/Egypt/HCoV2-Egy-002/2020|EPI_ISL_510532|2020-06-02	1		Sierra_Leone	5		V5I	7		V17L		30	2		22	3	81815	3.00011		hCoV-19/Netherlands/NA_640/2020|EPI_ISL_461075|2020-05-03	Y59H			England/EXET-135E61/2020|EPI_ISL_457174|2020-04-10	C12T		Canada/BC_10616731/2020|EPI_ISL_477119|2020-04	2		C203G	15		Guangdong	2020|EPI_ISL_413879|2020-02-05	C126T	Guangdong
Malaysia/IMR_WC13946/2020|EPI_ISL_490047|2020-04-10		Austria	418		hCoV-19/USA/NM-UNM-00142/2020|EPI_ISL_467653|2020-04-03	E8G		hCoV-19/Brazil/RJ-DCVN5/2020|EPI_ISL_510536|2020-07-20	1		France	5		A41V	7		V17A		31	2		23	2	81817	2.00002						England/EXET-135DEC/2020|EPI_ISL_457169|2020-04-09	C12T		Canada/BC_09029034/2020|EPI_ISL_477111|2020-04	2		G18A	14		Spain	2020|EPI_ISL_467115|2020-03-17	T127C	Spain
Italy/FVG-ICGEB_S5/2020|EPI_ISL_417419|2020-03-01		SaudiArabia	390		hCoV-19/England/CAMB-1B147A/2020|EPI_ISL_458525|2020-05-07	E8D		hCoV-19/Brazil/RJ-DCVN4/2020|EPI_ISL_510541|2020-07-20	1		DRC	4		C43F	7		L18F		41	2		24	4	81786	4.00157						England/20129122404/2020|EPI_ISL_424099|2020-03-13	C12T		Canada/BC_09026743/2020|EPI_ISL_477110|2020-04	2		A75T	14		Scotland	2020|EPI_ISL_453179|2020-05-15	G128T	England
Chile/Santiago_63/2020|EPI_ISL_445359|2020-03-16		Israel	349		hCoV-19/Bangladesh/BCSIR-NILMRC_133/2020|EPI_ISL_480419|2020-06-18	E8D		hCoV-19/USA/WI-UW-897/2020|EPI_ISL_509899|2020-07-12	1		Russia	4		K53R	7		L19F		46	2		25	2	81812	2.00015						USA/UT-02571/2020|EPI_ISL_487218|2020-04-25	C12T		Sichuan/SC-PHCC2-044/2020|EPI_ISL_451364|2020-02-12	2		G195A	14		USA	2020|EPI_ISL_487223|2020-04-24	G128C
USA/CA-SCCPHD-UC15/2020|EPI_ISL_417319|2020-03-05		Russia	347		hCoV-19/Belgium/UGent-107/2020|EPI_ISL_475067|2020-03-18	E8D		hCoV-19/Egypt/Army-MCL001/2020|EPI_ISL_510526|2020-06-01	1		Panama	4		V25A	6		L19S		47	2		26	2	81813	2.00012						USA/UT-02429/2020|EPI_ISL_470677|2020-04-21	C12T		England/NORT-291FF6/2020|EPI_ISL_489065|2020-05-07	2		T57A	13		England	2020|EPI_ISL_465540|2020-04-30	C129T
USA/WA-UW-4026/2020|EPI_ISL_437809|2020-03-29		Germany	346		hCoV-19/Romania/ROSV_2873/2020|EPI_ISL_491061|2020-04-17	E8D		hCoV-19/Switzerland/190016_541_E4/2020|EPI_ISL_500881|2020-07-06	1		Guangzhou	4		V58L	6		F20I		50	2		27	3	81815	3.00011						USA/UT-01886/2020|EPI_ISL_470706|2020-04-13	C12T		England/LIVE-A065B/2020|EPI_ISL_472124|2020-05-27	2		T58A	13		USA	2020|EPI_ISL_475735|2020-05-12	G131A
USA/WA-UW-2056/2020|EPI_ISL_477700|2020-03-24		Bangladesh	324		hCoV-19/USA/CA-SR016/2020|EPI_ISL_430016|2020-03-24	E8K		hCoV-19/Canada/ON_VIDO-01/2020|EPI_ISL_413015|2020-01-23	1		Costa_Rica	4		R61H	6		F20L		51	2		28	2	81817	2.00002						Wales/PHWC-25DD1/2020|EPI_ISL_422134|2020-03-25	C12T		Iran/IRVSH-01/2020|EPI_ISL_507007|2020-05-01	2		C211T	13		USA	2020|EPI_ISL_435365|2020-04-03	C132T
Taiwan/TSGH-21/2020|EPI_ISL_436106|2020-03-30		Thailand	287		hCoV-19/USA/CA-ALSR-1153/2020|EPI_ISL_494396|2020-04-27	E8D		hCoV-19/Israel/CVL-n-7920/2020|EPI_ISL_475007|2020-04-13	1		Austria	3		E8D	5		L21F		62	2		29	2	81817	2.00002						USA/UT-04035/2020|EPI_ISL_475729|2020-05-12	C12T		Guangdong/GDSZ202004-P0004/2020|EPI_ISL_413879|2020-02-05	2		C126T	11		USA	2020|EPI_ISL_470671|2020-04-20	A134G
Italy/IZSPB_2627/2020|EPI_ISL_477198|2020-03-20		Panama	282		hCoV-19/USA/WA-UW-631/2020|EPI_ISL_476911|2020-03-12	T9I		hCoV-19/USA/WA-S165/2020|EPI_ISL_430203|2020-03-18	1		Bangladesh	3		S16N	5		L21P		64	2		30	3	81781	3.00136						USA/UT-02419/2020|EPI_ISL_470545|2020-04-21	C12T		Austria/CeMM0342/2020|EPI_ISL_475803|2020-04-03	2		G121T	10		USA	2020|EPI_ISL_470549|2020-04-21	T135G
England/20139043404/2020|EPI_ISL_420678|2020-03-28		Luxembourg	271		hCoV-19/England/NORW-EAB56/2020|EPI_ISL_457356|2020-05-08	T9I		hCoV-19/Austria/Graz-MUG7/2020|EPI_ISL_437203|2020-04-06	1		Northern_Ireland	3		V24L	5		A22V		66	2		31	3	81816	3.00007						USA/UT-02137/2020|EPI_ISL_470709|2020-04-14	C12T		Northern_Ireland/NIRE-106ACF/2020|EPI_ISL_501013|2020-05-19	2		G145T	9		USA	2020|EPI_ISL_475729|2020-05-12	A136G
England/20139047104/2020|EPI_ISL_420692|2020-03-29		Finland	267		hCoV-19/England/NORW-EAB38/2020|EPI_ISL_457354|2020-05-09	T9I		hCoV-19/Sweden/20-51167/2020|EPI_ISL_450832|2020-05-04	1		Saudi_Arabia	3		F26L	5		A22S		69	2		32	2	81817	2.00002						USA/UT-03885/2020|EPI_ISL_475733|2020-05-12	C12T		Australia/SAP327/2020|EPI_ISL_483105|2020-03-27	2		G206A	9		USA	2020|EPI_ISL_430051|2020-04-02	A136T
England/20139045004/2020|EPI_ISL_420684|2020-03-27		DRC	262		hCoV-19/USA/CA-CZB-1341/2020|EPI_ISL_468360|2020-04-08	T9I		hCoV-19/USA/NM-UNM-00142/2020|EPI_ISL_467653|2020-04-03	1		Sichuan	3		S68Y	5		F23C		73	2		33	2	81817	2.00002						England/CAMB-79BD4/2020|EPI_ISL_441241|2020-04-01	C12T		Netherlands/NA_640/2020|EPI_ISL_461075|2020-05-03	2		A88G	8
England/20139038104/2020|EPI_ISL_420672|2020-03-27		New_Zealand	256		hCoV-19/England/BRIS-12DA59/2020|EPI_ISL_481821|2020-05-07	T9I		hCoV-19/England/CAMB-1B147A/2020|EPI_ISL_458525|2020-05-07	1		SaudiArabia	3		D72Y	4		V24M		74	2		34	2	81817	2.00002						USA/UT-01847/2020|EPI_ISL_470689|2020-04-13	C12T		India/NCDC-3965/2020|EPI_ISL_436444|2020-04-09	2		A197C	8			Probe
England/20139020506/2020|EPI_ISL_420664|2020-03-26		Wuhan	250		hCoV-19/Scotland/CVR2552/2020|EPI_ISL_484601|2020-04-15	T9I		hCoV-19/Bangladesh/BCSIR-NILMRC_133/2020|EPI_ISL_480419|2020-06-18	1		Egypt	2		D72G	4		V24L		75	2		35	1	81818	1						Luxembourg/LNS5358505/2020|EPI_ISL_429735|2020-03-20	C12T		Scotland/EDB4806/2020|EPI_ISL_453154|2020-05-11	2		G13A	7		Netherlands	2020|EPI_ISL_461075|2020-05-03	A88G	Netherlands
England/20139063704/2020|EPI_ISL_420747|2020-03-28		Italy	205		hCoV-19/Northern_Ireland/NIRE-FBB52/2020|EPI_ISL_470018|2020-04-13	T9I		hCoV-19/Belgium/UGent-107/2020|EPI_ISL_475067|2020-03-18	1		Shanghai	2		Y2H	3		V24A		2	1		36	2	81816	2.00005						USA/UT-03966/2020|EPI_ISL_470565|2020-04-21	C12T		Scotland/EDB3869/2020|EPI_ISL_439347|2020-04-30	2		G18T	7		Canada	2020|EPI_ISL_477022|2020-04	C89T	Canada
England/20139062204/2020|EPI_ISL_420739|2020-03-27		Hong_Kong	195		hCoV-19/USA/MI-UM-2006S001011/2020|EPI_ISL_484790|2020-04-07	T9I		hCoV-19/Romania/ROSV_2873/2020|EPI_ISL_491061|2020-04-17	1		Malaysia	2		V5F	3		V25A		4	1		37	4	81812	4.00029						USA/UT-02247/2020|EPI_ISL_436938|2020-04-15	C12T		Scotland/EDB4807/2020|EPI_ISL_478188|2020-05-11	2		C82T	7		USA	2020|EPI_ISL_470677|2020-04-21	A90G	USA
England/20139060004/2020|EPI_ISL_420731|2020-03-28		Turkey	183		hCoV-19/England/CAMB-1B477E/2020|EPI_ISL_473482|2020-06-03	T9I		hCoV-19/USA/CA-SR016/2020|EPI_ISL_430016|2020-03-24	1		Senegal	2		G10C	3		F26L		6	1		38	1	81818	1						USA/UT-02435/2020|EPI_ISL_470551|2020-04-22	C12T		Scotland/EDB3849/2020|EPI_ISL_439338|2020-04-29	2		A114G	7		USA	2020|EPI_ISL_470550|2020-04-21	C91A	England
England/20139058104/2020|EPI_ISL_420723|2020-03-28		Saudi_Arabia	171		hCoV-19/Scotland/CVR1675/2020|EPI_ISL_433649|2020-04-05	T9I		hCoV-19/USA/CA-ALSR-1153/2020|EPI_ISL_494396|2020-04-27	1		Romania	1		L18F	3		L27F		9	1		39	2	81817	2.00002						USA/UT-03477/2020|EPI_ISL_450543|2020-03-30	C12T		Scotland/EDB3701/2020|EPI_ISL_439312|2020-04-28	2		C122T	7		USA	2020|EPI_ISL_470702|2020-04-13	T92C	Wales
England/20139055304/2020|EPI_ISL_420715|2020-03-29		Chile	167		hCoV-19/Scotland/CVR2937/2020|EPI_ISL_438999|2020-04-22	T9I		hCoV-19/USA/WA-UW-631/2020|EPI_ISL_476911|2020-03-12	1		Hungary	1		L19F	3		L27S		11	1		40	1	81818	1						USA/UT-0139/2020|EPI_ISL_421562|2020-03-19	C12T		Scotland/EDB4998/2020|EPI_ISL_453179|2020-05-15	2		G128T	7		USA	2020|EPI_ISL_470731|2020-04-14	C95T	India
England/20139053304/2020|EPI_ISL_420707|2020-03-28		Oman	159		hCoV-19/Switzerland/120164/2020|EPI_ISL_468243|2020-04-25	T9I		hCoV-19/England/NORW-EAB56/2020|EPI_ISL_457356|2020-05-08	1		Iran	1		L37F	3		L28I		12	1		41	3	81801	3.00062						USA/UT-02243/2020|EPI_ISL_436934|2020-04-15	C12T		Scotland/EDB3764/2020|EPI_ISL_439319|2020-04-29	2		T74C	6		England	2020|EPI_ISL_441590|2020-04-06	C96T	Turkey
USA/ID-UW-4402/2020|EPI_ISL_430949|2020-03-29		Colombia	149		hCoV-19/England/NORW-E8DBC/2020|EPI_ISL_461808|2020-04-27	T9I		hCoV-19/England/NORW-EAB38/2020|EPI_ISL_457354|2020-05-09	1		South_Korea	1		V52L	3		V29A		13	1		42	1	81818	1						Turkey/HSGM-1432/2020|EPI_ISL_437326|2020-03-19	C12T		Scotland/EDB3603/2020|EPI_ISL_439298|2020-04-27	2		A75G	6		Wales	2020|EPI_ISL_432084|2020-03-30	T98C
USA/WA-UW-10094/2020|EPI_ISL_461463|2020-05-29		Norway	139		hCoV-19/Wales/PHWC-34689/2020|EPI_ISL_446956|2020-04-20	T9I		hCoV-19/USA/CA-CZB-1341/2020|EPI_ISL_468360|2020-04-08	1		Greece	1		R61C	3		T30I		18	1		43	4	81809	4.00044						USA/UT-02222/2020|EPI_ISL_436922|2020-04-15	C12T		Scotland/EDB4492/2020|EPI_ISL_449312|2020-05-05	2		C78T	6		USA	2020|EPI_ISL_436932|2020-04-15	C99T
USA/WA-UW-10102/2020|EPI_ISL_461464|2020-05-29		Senegal	135		hCoV-19/England/NORW-EA057/2020|EPI_ISL_448387|2020-05-03	T9I		hCoV-19/England/BRIS-12DA59/2020|EPI_ISL_481821|2020-05-07	1		Mali	1		V70F	3		T30A		23	1		44	2	81817	2.00002						Taiwan/NTU20/2020|EPI_ISL_422421|2020-03-19	C12T		Scotland/EDB4681/2020|EPI_ISL_478183|2020-05-08	2		A158G	6		India	2020|EPI_ISL_471637|2020-06-02	C100T
Australia/VIC2156/2020|EPI_ISL_480769|2020-06-16		Greece	128		hCoV-19/Switzerland/130013/2020|EPI_ISL_467007|2020-05-07	T9I		hCoV-19/Northern_Ireland/NIRE-FBB52/2020|EPI_ISL_470018|2020-04-13	1		Morocco	1		V5A	2		L31P		25	1		45	2	81817	2.00002						USA/UT-02550/2020|EPI_ISL_487203|2020-04-23	C12T		Scotland/EDB2594/2020|EPI_ISL_439235|2020-04-24	2		G172C	6		USA	2020|EPI_ISL_470706|2020-04-13	C107T
Taiwan/TSGH-20/2020|EPI_ISL_436105|2020-03-27		Taiwan	125		hCoV-19/England/CAMB-1AECB4/2020|EPI_ISL_448069|2020-05-06	T9I		hCoV-19/USA/MI-UM-2006S001011/2020|EPI_ISL_484790|2020-04-07	1		Norway	1		E7K	2		L31I		26	1		46	3	81815	3.00011						USA/UT-03886/2020|EPI_ISL_475734|2020-05-12	C12T		Scotland/EDB4680/2020|EPI_ISL_478182|2020-05-08	2		G182A	6		USA	2020|EPI_ISL_470682|2020-04-13	G108T
USA/WA-UW120/2020|EPI_ISL_416658|2020-03-11		Poland	114		hCoV-19/Denmark/ALAB-HH-240/2020|EPI_ISL_452080|2020-04-16	T9I		hCoV-19/England/CAMB-1B477E/2020|EPI_ISL_473482|2020-06-03	1		Latvia	1		A22V	2		A32V		28	1		47	3	81815	3.00011						USA/UT-02107/2020|EPI_ISL_470729|2020-04-13	C12T		Scotland/EDB5165/2020|EPI_ISL_473814|2020-05-18	2		T210C	6		Turkey	2020|EPI_ISL_437308|2020-03-25	C109T
Qatar/QA12/2020|EPI_ISL_427407|2020-03-23		Kenya	111		hCoV-19/England/NORW-EE69D/2020|EPI_ISL_490555|2020-04-24	T9I		hCoV-19/Scotland/CVR1675/2020|EPI_ISL_433649|2020-04-05	1		Philippines	1		L27F	2		I33T		29	1		48	2	81816	2.00005						USA/UT-02558/2020|EPI_ISL_487209|2020-04-24	C12T		Scotland/EDB2592/2020|EPI_ISL_439234|2020-04-24	2		G47A	5		Wales	2020|EPI_ISL_422134|2020-03-25	T110A
India/InStem_NCBS_0054/2020|EPI_ISL_477254|2020		Latvia	111		hCoV-19/Belgium/UGent-40/2020|EPI_ISL_434357|2020-03-27	T9I		hCoV-19/Switzerland/120164/2020|EPI_ISL_468243|2020-04-25	1		Lebanon	1		A36V	2		L34F		32	1		49	2	81809	2.00022						USA/UT-02420/2020|EPI_ISL_470546|2020-04-21	C12T		Scotland/EDB3826/2020|EPI_ISL_439333|2020-04-28	2		T57C	5		England	2020|EPI_ISL_440794|2020-04-04	T110G
England/201380034/2020|EPI_ISL_421798|2020-03-27		Malaysia	107		hCoV-19/Scotland/CVR3278/2020|EPI_ISL_456775|2020-05-04	T9I		hCoV-19/England/NORW-E8DBC/2020|EPI_ISL_461808|2020-04-27	1		North_Macedonia	1		L37H	2		A36V		33	1		50	3	81814	3.00015						USA/UT-01223/2020|EPI_ISL_436908|2020-04-08	C12T		Scotland/EDB4661/2020|EPI_ISL_449318|2020-05-08	2		T87C	5		England	2020|EPI_ISL_482125|2020-04-18	T111G
England/201361022/2020|EPI_ISL_421790|2020-03-25		Egypt	98		hCoV-19/England/NORW-EB9F1/2020|EPI_ISL_457466|2020-05-09	T9I		hCoV-19/Wales/PHWC-34689/2020|EPI_ISL_446956|2020-04-20	1		Singapore	1		I46V	2		L37F		34	1		51	3	81816	3.00007						USA/UT-01843/2020|EPI_ISL_470685|2020-04-13	C12T		Scotland/EDB4558/2020|EPI_ISL_461726|2020-05-06	2		G24T	4		USA	2020|EPI_ISL_470739|2020-04-23	T111A
England/201360506/2020|EPI_ISL_421782|2020-03-25		Shanghai	98		hCoV-19/England/NORW-E9EF4/2020|EPI_ISL_448380|2020-05-02	T9I		hCoV-19/England/NORW-EA057/2020|EPI_ISL_448387|2020-05-03	1		Kenya	1		V47F	2		L37H		36	1		52	4	81813	4.00024						USA/UT-01883/2020|EPI_ISL_470703|2020-04-13	C12T		Scotland/EDB4437/2020|EPI_ISL_493899|2020-05-04	2		C48T	4
England/201360295/2020|EPI_ISL_421774|2020-03-25		Guangdong	97		hCoV-19/England/NORW-EA646/2020|EPI_ISL_461860|2020-05-21	T9I		hCoV-19/Switzerland/130013/2020|EPI_ISL_467007|2020-05-07	1		Guangdong	1		N48S	2		L37R		39	1		53	2	81811	2.00017						USA/UT-02422/2020|EPI_ISL_470548|2020-04-21	C12T		Scotland/EDB4655/2020|EPI_ISL_493910|2020-05-08	2		C55T	4
England/20146004904/2020|EPI_ISL_421966|2020-04-01		Romania	93		hCoV-19/Scotland/GCVR-173D88/2020|EPI_ISL_459159|2020-04-07	T9I		hCoV-19/England/CAMB-1AECB4/2020|EPI_ISL_448069|2020-05-06	1		Fujian	1		S50I	2		L39M		44	1		54	2	81817	2.00002						USA/UT-01881/2020|EPI_ISL_470701|2020-04-13	C12T		Scotland/EDB3758/2020|EPI_ISL_491651|2020-04-29	2		G70T	4
England/20146012604/2020|EPI_ISL_421980|2020-03-31		Sichuan	90		hCoV-19/Scotland/CVR2288/2020|EPI_ISL_477894|2020-04-12	T9I		hCoV-19/Denmark/ALAB-HH-240/2020|EPI_ISL_452080|2020-04-16	1		Finland	1		S50G	2		A41S		45	1		55	2	81778	2.00098						India/CCMB_L1746/2020|EPI_ISL_471631|2020-06-01	C12T		Scotland/EDB2571/2020|EPI_ISL_491497|2020-04-24	2		T76C	4		Park et al. 2020		Forward
England/20146006904/2020|EPI_ISL_421972|2020-04-01		Vietnam	85		hCoV-19/Australia/NSW491/2020|EPI_ISL_455031|2020-04-23	T9I		hCoV-19/England/NORW-EE69D/2020|EPI_ISL_490555|2020-04-24	1		Croatia	1		Y59H	2		A41V		48	1		56	2	81817	2.00002						Wales/PHWC-15CCE2/2020|EPI_ISL_472608|2020-05-05	C12T		Wales/PHWC-165B43/2020|EPI_ISL_490770|2020-06-17	1		C171T	4
England/20144071004/2020|EPI_ISL_421958|2020-04-01		Ireland	84		hCoV-19/Brazil/SP-512/2020|EPI_ISL_471556|2020-04-18	T9I		hCoV-19/Belgium/UGent-40/2020|EPI_ISL_434357|2020-03-27	1		Algeria	1		N66H	2		C43F		49	1		57	1	81818	1						USA/UT-02244/2020|EPI_ISL_436935|2020-04-14	C12T		Wales/PHWC-165F56/2020|EPI_ISL_490818|2020-06-13	1		T198C	4		Taiwan	2020|EPI_ISL_422421|2020-03-19	C17T	Taiwan
England/20144049404/2020|EPI_ISL_421948|2020-03-31		Mexico	78		hCoV-19/England/NORW-EAB47/2020|EPI_ISL_457355|2020-05-10	T9I		hCoV-19/Scotland/CVR3278/2020|EPI_ISL_456775|2020-05-04	1		Bulgaria	1		V75F	2		C43R		53	1		58	4	81791	4.00132						USA/UT-03484/2020|EPI_ISL_450546|2020-04-03	C12T		England/20189121801/2020|EPI_ISL_465545|2020-05-01	1		C203A	4		Canada	2020|EPI_ISL_477111|2020-04	G18A	Canada
England/20144019304/2020|EPI_ISL_421940|2020-03-30		Beijing	73		hCoV-19/Scotland/CVR2795/2020|EPI_ISL_453076|2020-04-20	T9I		hCoV-19/England/NORW-EB9F1/2020|EPI_ISL_457466|2020-05-09	1		Vietnam	1		F4L	1		C43S		54	1		59	2	81816	2.00005						Wales/PHWC-2F44B/2020|EPI_ISL_446252|2020-04-08	C12T		Australia/NSW621/2020|EPI_ISL_490030|2020-05-31	1		G214T	4		Scotland	2020|EPI_ISL_439347|2020-04-30	G18T	Scotland
England/20144013504/2020|EPI_ISL_421932|2020-03-31		Costa_Rica	68		hCoV-19/Israel/CVL-n26167/2020|EPI_ISL_514294|2020-07-20	T9I		hCoV-19/England/NORW-E9EF4/2020|EPI_ISL_448380|2020-05-02	1		Yichun	1		V5L	1		C44Y		55	1		60	1	81818	1						USA/UT-02585/2020|EPI_ISL_487225|2020-04-25	C12T		Germany/BE-RKI-Z-0023/2020|EPI_ISL_483156|2020-04-27	1		A215G	4		USA	2020|EPI_ISL_449821|2020-04-07	G19A	USA
England/20140007202/2020|EPI_ISL_421924|2020-03-28		Hungary	61		hCoV-19/Israel/CVL-n25922/2020|EPI_ISL_514278|2020-07-20	T9I		hCoV-19/England/NORW-EA646/2020|EPI_ISL_461860|2020-05-21	1					S6L	1		N45R		56	1		61	4	81808	4.00049						USA/UT-01874/2020|EPI_ISL_470698|2020-04-13	C12T		England/20109093806/2020|EPI_ISL_417287|2020-03-06	1		C225A	4		USA	2020|EPI_ISL_487203|2020-04-23	G19C	Sierra_Leone
England/20139031804/2020|EPI_ISL_421916|2020-03-27		Hangzhou	56		hCoV-19/Israel/CVL-n26389/2020|EPI_ISL_514297|2020-07-21	T9I		hCoV-19/Scotland/GCVR-173D88/2020|EPI_ISL_459159|2020-04-07	1					E7Q	1		I46V		59	1		62	3	81778	3.00147						USA/UT-03859/2020|EPI_ISL_470720|2020-04-09	C12T		USA/UT-02051/2020|EPI_ISL_470669|2020-04-20	1		T4C	3		USA	2020|EPI_ISL_475734|2020-05-12	A21T	England
England/20139028904/2020|EPI_ISL_421908|2020-03-28		Uruguay	56		hCoV-19/Israel/CVL-n25955/2020|EPI_ISL_514282|2020-07-20	T9I		hCoV-19/Scotland/CVR2288/2020|EPI_ISL_477894|2020-04-12	1					E7D	1		I46F		65	1		63	1	81818	1						USA/UT-02426/2020|EPI_ISL_470675|2020-04-21	C12T		USA/UT-01870/2020|EPI_ISL_470694|2020-04-13	1		G13T	3		USA	2020|EPI_ISL_470729|2020-04-13	G22A
England/20139027004/2020|EPI_ISL_421900|2020-03-26		Kazakhstan	53		hCoV-19/Israel/CVL-n25867/2020|EPI_ISL_514270|2020-07-20	T9I		hCoV-19/Australia/NSW491/2020|EPI_ISL_455031|2020-04-23	1					E8G	1		V47F					64	3	81816	3.00007						USA/UT-04042/2020|EPI_ISL_475731|2020-05-12	C12T		USA/UT-02573/2020|EPI_ISL_487219|2020-04-25	1		G28T	3		USA	2020|EPI_ISL_487209|2020-04-24	A23G
England/20146063404/2020|EPI_ISL_421992|2020-04-01		Guangzhou	53		hCoV-19/Israel/CVL-n26131/2020|EPI_ISL_514288|2020-07-20	T9I		hCoV-19/Brazil/SP-512/2020|EPI_ISL_471556|2020-04-18	1					E8K	1		V47G					65	2	81817	2.00002						USA/UT-0510/2020|EPI_ISL_430057|2020-04-03	C12T		Wales/PHWC-28855/2020|EPI_ISL_432035|2020-04-01	1		C52T	3		Scotland	2020|EPI_ISL_461726|2020-05-06	G24T
England/20146025504/2020|EPI_ISL_421984|2020-04-01		Korea	53		hCoV-19/Israel/CVL-n26412/2020|EPI_ISL_514299|2020-07-21	T9I		hCoV-19/England/NORW-EAB47/2020|EPI_ISL_457355|2020-05-10	1					G10V	1		N48S					66	3	81808	3.00037						USA/UT-04014/2020|EPI_ISL_475725|2020-05-11	C12T		Turkey/HSGM-515/2020|EPI_ISL_437308|2020-03-25	1		C109T	3		USA	2020|EPI_ISL_470546|2020-04-21	G24C
England/20139025404/2020|EPI_ISL_421896|2020-03-26		Czech_Republic	51		hCoV-19/Israel/CVL-n25783/2020|EPI_ISL_514267|2020-07-19	T9I		hCoV-19/Scotland/CVR2795/2020|EPI_ISL_453076|2020-04-20	1					T11A	1		V49L					67	1	81818	1						USA/UT-02421/2020|EPI_ISL_470547|2020-04-21	C12T		USA/UT-0531/2020|EPI_ISL_435365|2020-04-03	1		C132T	3		Sierra_Leone	2020|EPI_ISL_512820|2020-04-14	C26T
England/20139023604/2020|EPI_ISL_421888|2020-03-27		Ecuador	49		hCoV-19/England/NORT-28356E/2020|EPI_ISL_478496|2020-03-31	G10C		hCoV-19/Israel/CVL-n26167/2020|EPI_ISL_514294|2020-07-20	1					L12F	1		S50I					68	4	81593	4.01103						USA/UT-01869/2020|EPI_ISL_470693|2020-04-13	C12T		USA/UT-01842/2020|EPI_ISL_470684|2020-04-13	1		G154T	3		USA	2020|EPI_ISL_487219|2020-04-25	G28T
England/20139007504/2020|EPI_ISL_421860|2020-03-27		Ghana	49		hCoV-19/Scotland/CVR2552/2020|EPI_ISL_484601|2020-04-15	G10C		hCoV-19/Israel/CVL-n25922/2020|EPI_ISL_514278|2020-07-20	1					I13V	1		S50G					69	3	81721	3.00356						USA/UT-01566/2020|EPI_ISL_449818|2020-04-07	C12T		USA/UT-02424/2020|EPI_ISL_470674|2020-04-21	1		T180C	3		USA	2020|EPI_ISL_436908|2020-04-08	G29T
England/20139003904/2020|EPI_ISL_421852|2020-03-27		Morocco	48		hCoV-19/Scotland/CVR2937/2020|EPI_ISL_438999|2020-04-22	G10C		hCoV-19/Israel/CVL-n26389/2020|EPI_ISL_514297|2020-07-21	1					S16G	1		L51F					70	4	81813	4.00024						USA/UT-02130/2020|EPI_ISL_470732|2020-04-14	C12T		USA/UT-05811/2020|EPI_ISL_483032|2020-05-11	1		C181T	3		USA	2020|EPI_ISL_470685|2020-04-13	T30C
England/20138086004/2020|EPI_ISL_421840|2020-03-24		Ukraine	46		hCoV-19/England/CAMB-7D2EA/2020|EPI_ISL_441590|2020-04-06	G10V		hCoV-19/Israel/CVL-n25955/2020|EPI_ISL_514282|2020-07-20	1					V17L	1		L51V					71	4	81745	4.00357						USA/UT-0539/2020|EPI_ISL_435372|2020-04-02	C12T		USA/UT-04839/2020|EPI_ISL_470567|2020-04-21	1		C193T	3		USA	2020|EPI_ISL_470703|2020-04-13	A31G
England/201380284/2020|EPI_ISL_421832|2020-03-23		Peru	45		hCoV-19/Netherlands/Zeeland_8/2020|EPI_ISL_461290|2020-03-06	T11A		hCoV-19/Israel/CVL-n25867/2020|EPI_ISL_514270|2020-07-20	1					V17A	1		V52L					72	7	81787	7.00265						USA/UT-01867/2020|EPI_ISL_470691|2020-04-13	C12T		USA/UT-01878/2020|EPI_ISL_470700|2020-04-13	1		G208T	3		USA	2020|EPI_ISL_482436|2020-05-15	G33T
England/201380228/2020|EPI_ISL_421824|2020-03-25		Argentina	38		hCoV-19/England/LOND-D68A1/2020|EPI_ISL_482216|2020-04-24	L12F		hCoV-19/Israel/CVL-n26131/2020|EPI_ISL_514288|2020-07-20	1					L19S	1		V52I					73	3	81717	3.00371						USA/UT-02434/2020|EPI_ISL_470550|2020-04-21	C12T		England/BRIS-128C85/2020|EPI_ISL_458901|2020-04-14	1		G222A	3		England	2020|EPI_ISL_457174|2020-04-10	A36G
England/201380064/2020|EPI_ISL_421816|2020-03-25		Nigeria	33		hCoV-19/Scotland/EDB348/2020|EPI_ISL_425977|2020-03-29	I13V		hCoV-19/Israel/CVL-n26412/2020|EPI_ISL_514299|2020-07-21	1					F20L	1		V52E					74	3	81816	3.00007						USA/UT-01882/2020|EPI_ISL_470702|2020-04-13	C12T		England/CAMB-1ACE38/2020|EPI_ISL_489437|2020-04-22	1		T14C	2		USA	2020|EPI_ISL_470548|2020-04-21	A36T
England/201380051/2020|EPI_ISL_421808|2020-03-25		United_Arab_Emirates	32		hCoV-19/Spain/COV001396/2020|EPI_ISL_452505|2020-03-18	S16N		hCoV-19/Israel/CVL-n25783/2020|EPI_ISL_514267|2020-07-19	1					L21P	1		K53R					75	3	81794	3.00088						USA/UT-02119/2020|EPI_ISL_470731|2020-04-14	C12T		USA/UT-01572/2020|EPI_ISL_449821|2020-04-07	1		G19A	2
England/201380036/2020|EPI_ISL_421800|2020-03-26		Bosnia_and_Herzegovina	29		hCoV-19/England/LIVE-9E711/2020|EPI_ISL_453325|2020-04-10	S16N		hCoV-19/England/NORT-28356E/2020|EPI_ISL_478496|2020-03-31	1					A22S	1		P54S														Wales/PHWC-2855E/2020|EPI_ISL_432084|2020-03-30	C12T		USA/OR-PROV-188/2020|EPI_ISL_482436|2020-05-15	1		G33T	2			Reverse
England/20139014404/2020|EPI_ISL_421877|2020-03-27		Jordan	28		hCoV-19/England/BRIS-12946E/2020|EPI_ISL_458767|2020-04-19	S16N		hCoV-19/Netherlands/Zeeland_8/2020|EPI_ISL_461290|2020-03-06	1					F23C	1		S55F														USA/UT-02235/2020|EPI_ISL_436932|2020-04-15	C12T		England/EXET-135E61/2020|EPI_ISL_457174|2020-04-10	1		A36G	2
England/20139009604/2020|EPI_ISL_421869|2020-03-27		Bahrein	27		hCoV-19/England/BRIS-12949B/2020|EPI_ISL_458834|2020-04-20	S16N		hCoV-19/England/LOND-D68A1/2020|EPI_ISL_482216|2020-04-24	1					V24A	1		F56L														India/CCMB_L1811/2020|EPI_ISL_471637|2020-06-02	C12T		England/EXET-135DEC/2020|EPI_ISL_457169|2020-04-09	1		T42C	2		Scotland	2020|EPI_ISL_439338|2020-04-29	A114G	Scotland
England/20148048004/2020|EPI_ISL_422012|2020-04-02		Philippines	23		hCoV-19/England/BRIS-12DF78/2020|EPI_ISL_482018|2020-04-20	S16N		hCoV-19/Scotland/EDB348/2020|EPI_ISL_425977|2020-03-29	1					L27S	1		V58F														USA/UT-01840/2020|EPI_ISL_470682|2020-04-13	C12T		England/20129122404/2020|EPI_ISL_424099|2020-03-13	1		C65T	2		USA	2020|EPI_ISL_468542|2020-04-11	T115A	USA
England/20148006504/2020|EPI_ISL_422004|2020-03-31		China	22		hCoV-19/Israel/CVL-n26112/2020|EPI_ISL_514285|2020-07-20	S16G		hCoV-19/Spain/COV001396/2020|EPI_ISL_452505|2020-03-18	1					L28I	1		V58L														England/BRIS-1224CF/2020|EPI_ISL_440794|2020-04-04	C12T		USA/UT-02571/2020|EPI_ISL_487218|2020-04-25	1		G81T	2		Austria	2020|EPI_ISL_475803|2020-04-03	G121T	Austria
Spain/Zaragoza2385/2020|EPI_ISL_468838|2020-03-23		Mali	21		hCoV-19/England/LIVE-9A38A/2020|EPI_ISL_440858|2020-04-17	V17L		hCoV-19/England/LIVE-9E711/2020|EPI_ISL_453325|2020-04-10	1					V29A	1		V58A														England/TBSD-24889CF/2020|EPI_ISL_482125|2020-04-18	C12T		USA/UT-02429/2020|EPI_ISL_470677|2020-04-21	1		A90G	2		Scotland	2020|EPI_ISL_439312|2020-04-28	C122T	Guangdong
Wales/PHWC-160577/2020|EPI_ISL_472950|2020-05-19		Georgia	21		hCoV-19/Iceland/582/2020|EPI_ISL_424602|2020-03-27	V17A		hCoV-19/England/BRIS-12946E/2020|EPI_ISL_458767|2020-04-19	1					L31P	1		Y59H														USA/UT-03177/2020|EPI_ISL_470739|2020-04-23	C12T		USA/UT-01886/2020|EPI_ISL_470706|2020-04-13	1		C107T	2		USA	2020|EPI_ISL_449817|2020-04-07	G123A	Spain
Senegal/63930/2020|EPI_ISL_477158|2020-06-12		Croatia	19		hCoV-19/England/20148065004/2020|EPI_ISL_423593|2020-04-02	L18F		hCoV-19/England/BRIS-12949B/2020|EPI_ISL_458834|2020-04-20	1					L31I	1		R61H														USA/CA-CZB-1613/2020|EPI_ISL_468542|2020-04-11	C12T		Wales/PHWC-25DD1/2020|EPI_ISL_422134|2020-03-25	1		T110A	2		Guangdong	2020|EPI_ISL_413879|2020-02-05	C126T	England
England/20109053406/2020|EPI_ISL_417278|2020-03-07		Estonia	19		hCoV-19/Spain/COV000698/2020|EPI_ISL_452766|2020-03-05	L18F		hCoV-19/England/BRIS-12DF78/2020|EPI_ISL_482018|2020-04-20	1					A32V	1		R61C														USA/UT-01564/2020|EPI_ISL_449817|2020-04-07	C12T		USA/UT-04035/2020|EPI_ISL_475729|2020-05-12	1		A136G	2		Spain	2020|EPI_ISL_467115|2020-03-17	T127C
USA/WA-UW-631/2020|EPI_ISL_476911|2020-03-12		Uganda	19		hCoV-19/Spain/COV000852/2020|EPI_ISL_452699|2020-03-11	L18F		hCoV-19/England/LIVE-9A38A/2020|EPI_ISL_440858|2020-04-17	1					I33T	1		R61L														Spain/COV001443/2020|EPI_ISL_467115|2020-03-17	C12A		USA/UT-02419/2020|EPI_ISL_470545|2020-04-21	1		G139T	2		Scotland	2020|EPI_ISL_453179|2020-05-15	G128T
England/20120013604/2020|EPI_ISL_465155|2020-03-15		Serbia	19		hCoV-19/Wales/PHWC-339BE/2020|EPI_ISL_446774|2020-04-20	L19S		hCoV-19/Iceland/582/2020|EPI_ISL_424602|2020-03-27	1					L34F	1		V62F														USA/UT-02581/2020|EPI_ISL_487223|2020-04-24	C12T		USA/UT-02137/2020|EPI_ISL_470709|2020-04-14	1		A143G	2		USA	2020|EPI_ISL_487223|2020-04-24	G128C
England/20182008804/2020|EPI_ISL_465449|2020-04-24		Indonesia	17		hCoV-19/Saudi_Arabia/42952/2020|EPI_ISL_469242|2020-03-15	L19F		hCoV-19/England/20148065004/2020|EPI_ISL_423593|2020-04-02	1					L37R	1		V62D														England/20189111201/2020|EPI_ISL_465540|2020-04-30	C12T		USA/UT-03885/2020|EPI_ISL_475733|2020-05-12	1		C144T	2		England	2020|EPI_ISL_465540|2020-04-30	C129T
Australia/VIC627/2020|EPI_ISL_426931|2020-03-29		Gambia	17		hCoV-19/Sierra_Leone/KGH-G-8669/2020|EPI_ISL_512820|2020-04-14	L19F		hCoV-19/Spain/COV000698/2020|EPI_ISL_452766|2020-03-05	1					L39M	1		N64K														USA/UT-04051/2020|EPI_ISL_475735|2020-05-12	C12T		England/CAMB-79BD4/2020|EPI_ISL_441241|2020-04-01	1		G147A	2
Qatar/QA17/2020|EPI_ISL_427412|2020-03-23		Qatar	16		hCoV-19/Portugal/PT1292/2020|EPI_ISL_511253|2020-03-24	L19F		hCoV-19/Spain/COV000852/2020|EPI_ISL_452699|2020-03-11	1					C43R	1		N64S														USA/UT-02055/2020|EPI_ISL_470671|2020-04-20	C12T		USA/UT-01847/2020|EPI_ISL_470689|2020-04-13	1		A148G	2
Australia/VIC2115/2020|EPI_ISL_480720|2020-06-17		Timor-Leste	16		hCoV-19/Canada/BC_09025513/2020|EPI_ISL_477109|2020-04	F20I		hCoV-19/Wales/PHWC-339BE/2020|EPI_ISL_446774|2020-04-20	1					C43S	1		L65M														USA/UT-02432/2020|EPI_ISL_470549|2020-04-21	C12T		Luxembourg/LNS5358505/2020|EPI_ISL_429735|2020-03-20	1		G149T	2
England/20142061304/2020|EPI_ISL_420770|2020-03-27		Bulgaria	15		hCoV-19/Canada/BC_20367856/2020|EPI_ISL_477022|2020-04	F20I		hCoV-19/Saudi_Arabia/42952/2020|EPI_ISL_469242|2020-03-15	1					C44Y	1		N66T														USA/UT-0501/2020|EPI_ISL_430051|2020-04-02	C12T		USA/UT-03966/2020|EPI_ISL_470565|2020-04-21	1		T175C	2
Belgium/ITM_C413/2020|EPI_ISL_450737|2020-04-10		Zhejiang	15		hCoV-19/Canada/BC_10601268/2020|EPI_ISL_477116|2020-04	F20I		hCoV-19/Portugal/PT1292/2020|EPI_ISL_511253|2020-03-24	1					N45R	1		N66H														USA/UT-03485/2020|EPI_ISL_450547|2020-04-03	C12T		USA/UT-02247/2020|EPI_ISL_436938|2020-04-15	1		T192C	2
Wuhan/WHUH007/2020|EPI_ISL_449482|2020-01-22		Lebanon	14		hCoV-19/Canada/BC_09023420/2020|EPI_ISL_477108|2020-04	F20I		hCoV-19/Canada/BC_09025513/2020|EPI_ISL_477109|2020-04	1					I46F	1		S68F														USA/UT-02116/2020|EPI_ISL_470730|2020-04-14	C12T		USA/UT-02435/2020|EPI_ISL_470551|2020-04-22	1		A196C	2
England/20124100602/2020|EPI_ISL_418738|2020-03-17		Fujian	13		hCoV-19/Canada/BC_07917795/2020|EPI_ISL_477100|2020-04	F20I		hCoV-19/Canada/BC_20367856/2020|EPI_ISL_477022|2020-04	1					V47G	1		S68C														USA/UT-02556/2020|EPI_ISL_487208|2020-04-24	C12T		USA/UT-03477/2020|EPI_ISL_450543|2020-03-30	1		G223T	2
Iceland/574/2020|EPI_ISL_424594|2020-03		Puerto_Rico	13		hCoV-19/Canada/BC_10600634/2020|EPI_ISL_477115|2020-04	F20I		hCoV-19/Canada/BC_10601268/2020|EPI_ISL_477116|2020-04	1					L51F	1		S68Y														USA/UT-01844/2020|EPI_ISL_470686|2020-04-13	C12T		USA/UT-0139/2020|EPI_ISL_421562|2020-03-19	1		C6T	1
Iceland/348/2020|EPI_ISL_424372|2020-03		North_Macedonia	13		hCoV-19/Canada/BC_09021025/2020|EPI_ISL_477107|2020-04	F20I		hCoV-19/Canada/BC_09023420/2020|EPI_ISL_477108|2020-04	1					L51V	1		R69I														USA/NM-UNM-00121/2020|EPI_ISL_467647|2020-04-02	C12T		USA/UT-02243/2020|EPI_ISL_436934|2020-04-15	1		A9C	1
England/20110059306/2020|EPI_ISL_417312|2020-03-08		Benin	12		hCoV-19/Canada/BC_10600259/2020|EPI_ISL_477114|2020-04	F20I		hCoV-19/Canada/BC_07917795/2020|EPI_ISL_477100|2020-04	1					V52I	1		R69K														England/BIRM-5EE54/2020|EPI_ISL_456657|2020	C12T		Turkey/HSGM-1432/2020|EPI_ISL_437326|2020-03-19	1		C12A	1
Australia/VIC1724/2020|EPI_ISL_456624|2020		Sierra_Leone	11		hCoV-19/Canada/BC_09040534/2020|EPI_ISL_477113|2020-04	F20I		hCoV-19/Canada/BC_10600634/2020|EPI_ISL_477115|2020-04	1					V52E	1		V70F														USA/UT-02423/2020|EPI_ISL_470673|2020-04-21	C12T		USA/UT-02222/2020|EPI_ISL_436922|2020-04-15	1		G13C	1
England/20106087206/2020|EPI_ISL_417245|2020-03-02		Nanchang	10		hCoV-19/Canada/BC_09009433/2020|EPI_ISL_477105|2020-04	F20I		hCoV-19/Canada/BC_09021025/2020|EPI_ISL_477107|2020-04	1					P54S	1		V70I														USA/UT-02223/2020|EPI_ISL_436923|2020-04-15	C12T		Taiwan/NTU20/2020|EPI_ISL_422421|2020-03-19	1		C17T	1
England/20104015302/2020|EPI_ISL_417236|2020-03-01		Bahrain	10		hCoV-19/Canada/BC_10616731/2020|EPI_ISL_477119|2020-04	F20I		hCoV-19/Canada/BC_10600259/2020|EPI_ISL_477114|2020-04	1					F56L	1		V70A														Wales/PHWC-2B01E/2020|EPI_ISL_432265|2020-04-08	C12T		USA/UT-02550/2020|EPI_ISL_487203|2020-04-23	1		G19C	1
England/20109097506/2020|EPI_ISL_417293|2020-03-08		Guatemala	10		hCoV-19/Canada/BC_09029034/2020|EPI_ISL_477111|2020-04	F20I		hCoV-19/Canada/BC_09040534/2020|EPI_ISL_477113|2020-04	1					V58A	1		P71L														Wales/PHWC-31710/2020|EPI_ISL_446478|2020-04-13	C12T		USA/UT-03886/2020|EPI_ISL_475734|2020-05-12	1		A21T	1
England/20109093806/2020|EPI_ISL_417287|2020-03-06		Pakistan	9		hCoV-19/Canada/BC_09026743/2020|EPI_ISL_477110|2020-04	F20I		hCoV-19/Canada/BC_09009433/2020|EPI_ISL_477105|2020-04	1					R61L	1		P71S														USA/UT-01887/2020|EPI_ISL_470744|2020-04-13	C12T		USA/UT-02107/2020|EPI_ISL_470729|2020-04-13	1		G22A	1
England/20108007002/2020|EPI_ISL_417255|2020-03-04		Jamaica	8		hCoV-19/Bangladesh/BCSIR-NILMRC_115/2020|EPI_ISL_475758|2020-06-07	F20L		hCoV-19/Canada/BC_10616731/2020|EPI_ISL_477119|2020-04	1					V62D	1		P71H														USA/UT-01848/2020|EPI_ISL_470690|2020-04-13	C12T		USA/UT-02558/2020|EPI_ISL_487209|2020-04-24	1		A23G	1
Spain/Andalucia202659/2020|EPI_ISL_462477|2020-03-13		Cyprus	8		hCoV-19/England/NORT-29CBCA/2020|EPI_ISL_484293|2020-05-01	L21F		hCoV-19/Canada/BC_09029034/2020|EPI_ISL_477111|2020-04	1					N64K	1		D72H														USA/UT-02569/2020|EPI_ISL_487217|2020-04-25	C12T		USA/UT-02420/2020|EPI_ISL_470546|2020-04-21	1		G24C	1
Australia/VIC1007/2020|EPI_ISL_480570|2020-03-31		Shandong	8		hCoV-19/England/BRIS-1229C0/2020|EPI_ISL_440667|2020-04-03	L21F		hCoV-19/Canada/BC_09026743/2020|EPI_ISL_477110|2020-04	1					N64S	1		D72Y														USA/UT-04006/2020|EPI_ISL_483020|2020-05-11	C12T		USA/UT-01223/2020|EPI_ISL_436908|2020-04-08	1		G29T	1
Australia/VIC1269/2020|EPI_ISL_436127|2020-04-13		Shangrao	8		hCoV-19/Spain/Zaragoza2458/2020|EPI_ISL_468791|2020-03-26	L21F		hCoV-19/Bangladesh/BCSIR-NILMRC_115/2020|EPI_ISL_475758|2020-06-07	1					L65M	1		D72G														USA/UT-0370/2020|EPI_ISL_430039|2020-03-30	C12T		USA/UT-01843/2020|EPI_ISL_470685|2020-04-13	1		T30C	1
Israel/n14285/2020|EPI_ISL_483711|2020-03-30		Tunisia	8		hCoV-19/England/CAMB-7D208/2020|EPI_ISL_442118|2020-04-06	L21F		hCoV-19/England/NORT-29CBCA/2020|EPI_ISL_484293|2020-05-01	1					V70I	1		D72N														USA/UT-02224/2020|EPI_ISL_436924|2020-04-15	C12T		USA/UT-01883/2020|EPI_ISL_470703|2020-04-13	1		A31G	1
Bangladesh/BCSIR-NILMRC_203/2020|EPI_ISL_483700|2020-06-20		Kuwait	8		hCoV-19/England/BRIS-1218B5/2020|EPI_ISL_440172|2020-03-14	L21F		hCoV-19/England/BRIS-1229C0/2020|EPI_ISL_440667|2020-04-03	1					V70A	1		D72V														USA/UT-02136/2020|EPI_ISL_470708|2020-04-14	C12T		USA/UT-02422/2020|EPI_ISL_470548|2020-04-21	1		A36T	1
USA/OR-OHSU-0088/2020|EPI_ISL_468102|2020-04-25		Iran	8		hCoV-19/England/CAMB-78768/2020|EPI_ISL_477818|2020-04-05	L21F		hCoV-19/Spain/Zaragoza2458/2020|EPI_ISL_468791|2020-03-26	1					P71H	1		D72A														Brazil/PA164684-IEC/2020|EPI_ISL_458148|2020-04-27	C12T		USA/UT-01881/2020|EPI_ISL_470701|2020-04-13	1		A37G	1
England/LOND-D4797/2020|EPI_ISL_444153|2020-04-09		Shenzhen	6		hCoV-19/England/BRIS-121DB6/2020|EPI_ISL_440098|2020-03-17	L21F		hCoV-19/England/CAMB-7D208/2020|EPI_ISL_442118|2020-04-06	1					D72N	1		L73F														England/BIRM-5EE63/2020|EPI_ISL_456658|2020	C12T		India/CCMB_L1746/2020|EPI_ISL_471631|2020-06-01	1		A46G	1
USA/OR-OHSU-0188/2020|EPI_ISL_468129|2020-05-13		Sri_Lanka	6		hCoV-19/Denmark/ALAB-SSI260/2020|EPI_ISL_429422|2020-03-10	L21F		hCoV-19/England/BRIS-1218B5/2020|EPI_ISL_440172|2020-03-14	1					D72V	1		L73V														USA/UT-01885/2020|EPI_ISL_470705|2020-04-13	C12T		Wales/PHWC-15CCE2/2020|EPI_ISL_472608|2020-05-05	1		G49T	1
USA/OR-OHSU-0176/2020|EPI_ISL_468119|2020-05-08		Shaoxing	6		hCoV-19/England/CAMB-752F1/2020|EPI_ISL_440390|2020-03-17	L21F		hCoV-19/England/CAMB-78768/2020|EPI_ISL_477818|2020-04-05	1					D72A	1		L74P														USA/UT-02437/2020|EPI_ISL_470552|2020-04-21	C12T		USA/UT-02244/2020|EPI_ISL_436935|2020-04-14	1		T50C	1
USA/OR-OHSU-0141/2020|EPI_ISL_468111|2020-05-05		Slovenia	5		hCoV-19/England/BRIS-121994/2020|EPI_ISL_440196|2020-03-15	L21F		hCoV-19/England/BRIS-121DB6/2020|EPI_ISL_440098|2020-03-17	1					L73V	1		L74V														England/20204052504/2020|EPI_ISL_465650|2020-05-06	C12T		USA/UT-03484/2020|EPI_ISL_450546|2020-04-03	1		A51T	1
England/LOND-D4A9E/2020|EPI_ISL_444176|2020-04-11		Lishui	5		hCoV-19/England/BRIS-12A2FA/2020|EPI_ISL_458343|2020-04-16	L21F		hCoV-19/Denmark/ALAB-SSI260/2020|EPI_ISL_429422|2020-03-10	1					L74P	1		V75L														USA/UT-02574/2020|EPI_ISL_487220|2020-04-25	C12T		Wales/PHWC-2F44B/2020|EPI_ISL_446252|2020-04-08	1		T54C	1
England/LOND-D4A07/2020|EPI_ISL_444168|2020-04-10		Brunei	5		hCoV-19/England/CAMB-1AB886/2020|EPI_ISL_470259|2020-04-21	L21F		hCoV-19/England/CAMB-752F1/2020|EPI_ISL_440390|2020-03-17	1					L74V	1		V75F														USA/UT-01853/2020|EPI_ISL_470658|2020-04-13	C12T		USA/UT-02585/2020|EPI_ISL_487225|2020-04-25	1		T56C	1
England/LOND-D4982/2020|EPI_ISL_444160|2020-04-10		Jiangsu	4		hCoV-19/South_Africa/KRISP-0584/2020|EPI_ISL_498122|2020-07-07	L21P		hCoV-19/England/BRIS-121994/2020|EPI_ISL_440196|2020-03-15	1																						USA/UT-0511/2020|EPI_ISL_430058|2020-04-03	C12T		USA/UT-01874/2020|EPI_ISL_470698|2020-04-13	1		T58C	1
England/LOND-D4603/2020|EPI_ISL_444141|2020-04-08		Slovakia	4		hCoV-19/Spain/AN-006091/2020|EPI_ISL_510427|2020-05-08	L21F		hCoV-19/England/BRIS-12A2FA/2020|EPI_ISL_458343|2020-04-16	1																						England/BRIS-1267C2/2020|EPI_ISL_458972|2020-04-09	C12T		USA/UT-03859/2020|EPI_ISL_470720|2020-04-09	1		T62C	1
England/LOND-D44FA/2020|EPI_ISL_444131|2020-04-08		Liaoning	4		hCoV-19/Spain/AN-003995/2020|EPI_ISL_500160|2020-04-20	L21F		hCoV-19/England/CAMB-1AB886/2020|EPI_ISL_470259|2020-04-21	1																						England/NORT-29DD4B/2020|EPI_ISL_484316|2020-05-07	C12T		USA/UT-02426/2020|EPI_ISL_470675|2020-04-21	1		T63A	1
England/LOND-D4454/2020|EPI_ISL_444123|2020-04-08		Chongqing	3		hCoV-19/Spain/AN-004012/2020|EPI_ISL_500217|2020-04-22	L21F		hCoV-19/South_Africa/KRISP-0584/2020|EPI_ISL_498122|2020-07-07	1																						Netherlands/Gelderland_25/2020|EPI_ISL_460925|2020-04-24	C12T		USA/UT-04042/2020|EPI_ISL_475731|2020-05-12	1		G64T	1
England/LOND-D430C/2020|EPI_ISL_444115|2020-04-06		Algeria	3		hCoV-19/Bangladesh/BCSIR-NILMRC_280/2020|EPI_ISL_498419|2020-07-21	L21F		hCoV-19/Spain/AN-006091/2020|EPI_ISL_510427|2020-05-08	1																						USA/UT-04131/2020|EPI_ISL_493030|2020-05-13	C12T		USA/UT-0510/2020|EPI_ISL_430057|2020-04-03	1		T68G	1
England/LOND-D425A/2020|EPI_ISL_444107|2020-04-06		Foshan	3		hCoV-19/India/MN1/2020|EPI_ISL_508415|2020-06-16	L21F		hCoV-19/Spain/AN-003995/2020|EPI_ISL_500160|2020-04-20	1																						USA/UT-03356/2020|EPI_ISL_498650|2020-04-23	C12T		USA/UT-04014/2020|EPI_ISL_475725|2020-05-11	1		G70C	1
USA/TX-HMH094/2020|EPI_ISL_434799|2020-03-19		Venezuela	3		hCoV-19/Spain/AN-003961/2020|EPI_ISL_500178|2020-04-10	L21F		hCoV-19/Spain/AN-004012/2020|EPI_ISL_500217|2020-04-22	1																						USA/UT-02895/2020|EPI_ISL_513686|2020-04-29	C12T		USA/UT-02421/2020|EPI_ISL_470547|2020-04-21	1		T71C	1
USA/TX-HMH082/2020|EPI_ISL_434791|2020-03-19		Guam	3		hCoV-19/England/NORT-29E014/2020|EPI_ISL_493504|2020-05-06	L21F		hCoV-19/Bangladesh/BCSIR-NILMRC_280/2020|EPI_ISL_498419|2020-07-21	1																						USA/UT-02757/2020|EPI_ISL_513644|2020-04-29	C12T		USA/UT-01869/2020|EPI_ISL_470693|2020-04-13	1		C78G	1
USA/TX-HMH074/2020|EPI_ISL_434783|2020-03-18		Fuzhou	3		hCoV-19/Spain/AN-004006/2020|EPI_ISL_500173|2020-04-21	L21F		hCoV-19/India/MN1/2020|EPI_ISL_508415|2020-06-16	1																						USA/UT-02853/2020|EPI_ISL_513661|2020-04-29	C12T		USA/UT-01566/2020|EPI_ISL_449818|2020-04-07	1		T80C	1
England/LOND-D5365/2020|EPI_ISL_444213|2020-04-15		Belarus	3		hCoV-19/Spain/AN-004023/2020|EPI_ISL_500201|2020-04-27	L21F		hCoV-19/Spain/AN-003961/2020|EPI_ISL_500178|2020-04-10	1																						USA/UT-02847/2020|EPI_ISL_513656|2020-04-29	C12T		USA/UT-02130/2020|EPI_ISL_470732|2020-04-14	1		G81A	1
England/LOND-D52B3/2020|EPI_ISL_444205|2020-04-15		Yichun	3		hCoV-19/Spain/AN-003999/2020|EPI_ISL_500195|2020-04-20	L21F		hCoV-19/England/NORT-29E014/2020|EPI_ISL_493504|2020-05-06	1																						USA/UT-04140/2020|EPI_ISL_493039|2020-05-13	C12T		USA/UT-0539/2020|EPI_ISL_435372|2020-04-02	1		C82A	1
England/LOND-D505F/2020|EPI_ISL_444197|2020-04-13		Lithuania	3		hCoV-19/Spain/AN-004002/2020|EPI_ISL_500198|2020-04-20	L21F		hCoV-19/Spain/AN-004006/2020|EPI_ISL_500173|2020-04-21	1																						USA/UT-02448/2020|EPI_ISL_493089|2020-04-22	C12T		USA/UT-01867/2020|EPI_ISL_470691|2020-04-13	1		T86C	1
England/LOND-D4E74/2020|EPI_ISL_444186|2020-04-14		Belize	3		hCoV-19/Spain/AN-003991/2020|EPI_ISL_500190|2020-04-17	L21F		hCoV-19/Spain/AN-004023/2020|EPI_ISL_500201|2020-04-27	1																						USA/UT-01857/2020|EPI_ISL_498631|2020-04-13	C12T		USA/UT-02434/2020|EPI_ISL_470550|2020-04-21	1		C91A	1
USA/TX-HMH0267/2020|EPI_ISL_434896|2020-03-26		Harbin	2		hCoV-19/Spain/AN-004001/2020|EPI_ISL_500197|2020-04-20	L21F		hCoV-19/Spain/AN-003999/2020|EPI_ISL_500195|2020-04-20	1																						USA/UT-02861/2020|EPI_ISL_513667|2020-04-29	C12T		USA/UT-01882/2020|EPI_ISL_470702|2020-04-13	1		T92C	1
USA/TX-HMH0213/2020|EPI_ISL_434888|2020-03-24		Jiujiang	2		hCoV-19/Spain/AN-003985/2020|EPI_ISL_500188|2020-04-16	L21F		hCoV-19/Spain/AN-004002/2020|EPI_ISL_500198|2020-04-20	1																						USA/UT-CDC-9782/2020|EPI_ISL_509709|2020-05-06	C12T		USA/UT-02119/2020|EPI_ISL_470731|2020-04-14	1		C95T	1
USA/TX-HMH0205/2020|EPI_ISL_434880|2020-03-24		Russia_	2		hCoV-19/South_Africa/LR00146/2020|EPI_ISL_514414|2020-07-20	L21F		hCoV-19/Spain/AN-003991/2020|EPI_ISL_500190|2020-04-17	1																						USA/UT-CDC-9755/2020|EPI_ISL_509692|2020-04-27	C12T		Wales/PHWC-2855E/2020|EPI_ISL_432084|2020-03-30	1		T98C	1
USA/TX-HMH0197/2020|EPI_ISL_434872|2020-03-23		Yunnan	2		hCoV-19/Spain/AN-004020/2020|EPI_ISL_500206|2020-04-24	L21F		hCoV-19/Spain/AN-004001/2020|EPI_ISL_500197|2020-04-20	1																						USA/UT-02849/2020|EPI_ISL_513658|2020-04-29	C12T		USA/UT-02235/2020|EPI_ISL_436932|2020-04-15	1		C99T	1
USA/TX-HMH0186/2020|EPI_ISL_434864|2020-03-23		Jian	2		hCoV-19/Spain/AN-003951/2020|EPI_ISL_500175|2020-04-07	L21F		hCoV-19/Spain/AN-003985/2020|EPI_ISL_500188|2020-04-16	1																						USA/UT-04133/2020|EPI_ISL_493032|2020-05-13	C12T		India/CCMB_L1811/2020|EPI_ISL_471637|2020-06-02	1		C100T	1
USA/TX-HMH0157/2020|EPI_ISL_434856|2020-03-23		Bucuresti	2		hCoV-19/Spain/AN-003998/2020|EPI_ISL_500194|2020-04-20	L21F		hCoV-19/South_Africa/LR00146/2020|EPI_ISL_514414|2020-07-20	1																						USA/TX-DSHS-0016/2020|EPI_ISL_515261|2020-05-08	C12T		USA/UT-01840/2020|EPI_ISL_470682|2020-04-13	1		G108T	1
USA/TX-HMH0126/2020|EPI_ISL_434826|2020-03-20		Pingxiang	2		hCoV-19/Spain/AN-004000/2020|EPI_ISL_500196|2020-04-20	L21F		hCoV-19/Spain/AN-004020/2020|EPI_ISL_500206|2020-04-24	1																						USA/UT-03354/2020|EPI_ISL_498649|2020-04-22	C12T		England/BRIS-1224CF/2020|EPI_ISL_440794|2020-04-04	1		T110G	1
USA/TX-HMH0102/2020|EPI_ISL_434807|2020-03-20		Xinyu	2		hCoV-19/Spain/AN-003984/2020|EPI_ISL_500187|2020-04-16	L21F		hCoV-19/Spain/AN-003951/2020|EPI_ISL_500175|2020-04-07	1																						USA/UT-02841/2020|EPI_ISL_513651|2020-04-29	C12T		England/TBSD-24889CF/2020|EPI_ISL_482125|2020-04-18	1		T111G	1
Belgium/UGent-4/2020|EPI_ISL_419266|2020-03-24		Myanmar	2		hCoV-19/Australia/VIC761/2020|EPI_ISL_427037|2020-03-30	A22V		hCoV-19/Spain/AN-003998/2020|EPI_ISL_500194|2020-04-20	1																						USA/UT-02756/2020|EPI_ISL_513643|2020-04-29	C12T		USA/UT-03177/2020|EPI_ISL_470739|2020-04-23	1		T111A	1
Hong_Kong/HKPU84-2502/2020|EPI_ISL_419248|2020-02-24		Madagascar	2		hCoV-19/Iceland/586/2020|EPI_ISL_424606|2020-03-28	A22S		hCoV-19/Spain/AN-004000/2020|EPI_ISL_500196|2020-04-20	1																						USA/UT-02882/2020|EPI_ISL_509527|2020-04-30	C12T		USA/CA-CZB-1613/2020|EPI_ISL_468542|2020-04-11	1		T115A	1
Hong_Kong/HKPU64-1202/2020|EPI_ISL_419232|2020-02-19		UK	2		hCoV-19/Denmark/ALAB-SSI-625/2020|EPI_ISL_437005|2020-03-24	A22V		hCoV-19/Spain/AN-003984/2020|EPI_ISL_500187|2020-04-16	1																						USA/UT-02987/2020|EPI_ISL_509555|2020-05-01	C12T		USA/UT-01564/2020|EPI_ISL_449817|2020-04-07	1		G123A	1
Hong_Kong/HKPU38-3001/2020|EPI_ISL_419213|2020-02-09		Cuba	2		hCoV-19/England/NORT-29AF0C/2020|EPI_ISL_493488|2020-05-26	F23C		hCoV-19/Australia/VIC761/2020|EPI_ISL_427037|2020-03-30	1																						USA/UT-03348/2020|EPI_ISL_498648|2020-04-21	C12T		Spain/COV001443/2020|EPI_ISL_467115|2020-03-17	1		T127C	1
Bangladesh/BCSIR-NILMRC_181/2020|EPI_ISL_483629|2020-06-20		Cambodia	1		hCoV-19/England/CAMB-7FDAB/2020|EPI_ISL_444413|2020-04-20	V24M		hCoV-19/Iceland/586/2020|EPI_ISL_424606|2020-03-28	1																						USA/UT-02852/2020|EPI_ISL_513660|2020-04-29	C12T		USA/UT-02581/2020|EPI_ISL_487223|2020-04-24	1		G128C	1
USA/CA-CZB-1090/2020|EPI_ISL_444024|2020-05-01		Hefei	1		hCoV-19/England/CAMB-7B12B/2020|EPI_ISL_433921|2020-04-11	V24M		hCoV-19/Denmark/ALAB-SSI-625/2020|EPI_ISL_437005|2020-03-24	1																						USA/UT-04019/2020|EPI_ISL_493028|2020-05-11	C12T		England/20189111201/2020|EPI_ISL_465540|2020-04-30	1		C129T	1
USA/TX-HMH0147/2020|EPI_ISL_434846|2020-03-22		Anhui	1		hCoV-19/Spain/COV001524/2020|EPI_ISL_467135|2020-03-19	V24M		hCoV-19/England/NORT-29AF0C/2020|EPI_ISL_493488|2020-05-26	1																						USA/UT-02840/2020|EPI_ISL_513650|2020-04-29	C12T		USA/UT-04051/2020|EPI_ISL_475735|2020-05-12	1		G131A	1
USA/TX-HMH0138/2020|EPI_ISL_434838|2020-03-21		Nepal	1		hCoV-19/England/CAMB-1B046C/2020|EPI_ISL_459276|2020-05-01	V24M		hCoV-19/England/CAMB-7FDAB/2020|EPI_ISL_444413|2020-04-20	1																						USA/UT-02856/2020|EPI_ISL_513664|2020-04-29	C12T		USA/UT-02055/2020|EPI_ISL_470671|2020-04-20	1		A134G	1
USA/TX-HMH0118/2020|EPI_ISL_434819|2020-03-20		Andalusia	1		hCoV-19/Scotland/CVR2840/2020|EPI_ISL_448196|2020-04-21	V24M		hCoV-19/England/CAMB-7B12B/2020|EPI_ISL_433921|2020-04-11	1																						USA/UT-02850/2020|EPI_ISL_513659|2020-04-29	C12T		USA/UT-02432/2020|EPI_ISL_470549|2020-04-21	1		T135G	1
USA/TX-HMH0108/2020|EPI_ISL_434811|2020-03-20		Romania_	1		hCoV-19/England/SHEF-D2B51/2020|EPI_ISL_442511|2020-04-12	V24M		hCoV-19/Spain/COV001524/2020|EPI_ISL_467135|2020-03-19	1																						USA/FL-AFFD/2020|EPI_ISL_513281|2020-06-29	C12T		USA/UT-0501/2020|EPI_ISL_430051|2020-04-02	1		A136T	1
Sweden/20-07439/2020|EPI_ISL_434670|2020-04-17		Jingzhou	1		hCoV-19/England/CAMB-1AEBB7/2020|EPI_ISL_448056|2020-05-01	V24M		hCoV-19/England/CAMB-1B046C/2020|EPI_ISL_459276|2020-05-01	1																						India/GBRC345/2020|EPI_ISL_514587|2020-06-18	C12T		USA/UT-03485/2020|EPI_ISL_450547|2020-04-03	1		T138A	1
USA/NY-Yale-026/2020|EPI_ISL_420094|2020-03-19		Jiangxi	1		hCoV-19/England/SHEF-C5D3D/2020|EPI_ISL_432810|2020-03-18	V24M		hCoV-19/Scotland/CVR2840/2020|EPI_ISL_448196|2020-04-21	1																						USA/UT-01819/2020|EPI_ISL_509570|2020-04-09	C12T		USA/UT-02116/2020|EPI_ISL_470730|2020-04-14	1		T140G	1
USA/CT-Yale-012/2020|EPI_ISL_420086|2020-03-19		Yingtan	1		hCoV-19/Netherlands/ZuidHolland_69/2020|EPI_ISL_422937|2020-03-24	V24L		hCoV-19/England/SHEF-D2B51/2020|EPI_ISL_442511|2020-04-12	1																						USA/UT-03786/2020|EPI_ISL_509593|2020-04-05	C12T		USA/UT-02556/2020|EPI_ISL_487208|2020-04-24	1		T141C	1
Senegal/600/2020|EPI_ISL_420074|2020-03-20		Henan	1		hCoV-19/England/CAMB-7B45F/2020|EPI_ISL_433959|2020-04-11	V24M		hCoV-19/England/CAMB-1AEBB7/2020|EPI_ISL_448056|2020-05-01	1																						USA/UT-03453/2020|EPI_ISL_509578|2020-04-20	C12T		USA/UT-01844/2020|EPI_ISL_470686|2020-04-13	1		G147T	1
Hong_Kong/HKPU57-0702/2020|EPI_ISL_419227|2020-02-15		Ganzhou	1		hCoV-19/England/CAMB-71AC0/2020|EPI_ISL_439659|2020-03-31	V24M		hCoV-19/England/SHEF-C5D3D/2020|EPI_ISL_432810|2020-03-18	1																						Australia/NSW2004/2020|EPI_ISL_500596|2020-03-15	C12T		USA/NM-UNM-00121/2020|EPI_ISL_467647|2020-04-02	1		C151T	1
Bangladesh/BCSIR-NILMRC_211/2020|EPI_ISL_483645|2020-06-14		Changzhou	1		hCoV-19/England/CAMB-73E1D/2020|EPI_ISL_440330|2020-03-18	V24M		hCoV-19/Netherlands/ZuidHolland_69/2020|EPI_ISL_422937|2020-03-24	1																						England/BRIS-13007F/2020|EPI_ISL_492545|2020-04-11	C12T		England/BIRM-5EE54/2020|EPI_ISL_456657|2020	1		C151G	1
USA/OR-OHSU-0085/2020|EPI_ISL_468099|2020-04-25		Tianmen	1		hCoV-19/England/CAMB-1ADB21/2020|EPI_ISL_448035|2020-05-01	V24M		hCoV-19/England/CAMB-7B45F/2020|EPI_ISL_433959|2020-04-11	1																						England/BRIS-130710/2020|EPI_ISL_492613|2020-04-12	C12T		USA/UT-02423/2020|EPI_ISL_470673|2020-04-21	1		G154A	1
USA/OR-OHSU-0067/2020|EPI_ISL_468091|2020-04-22		Mongolia	1		hCoV-19/England/CAMB-1B0A2E/2020|EPI_ISL_452929|2020-05-12	V24M		hCoV-19/England/CAMB-71AC0/2020|EPI_ISL_439659|2020-03-31	1																						England/BRIS-18536C5/2020|EPI_ISL_492301|2020-04-10	C12T		USA/UT-02223/2020|EPI_ISL_436923|2020-04-15	1		T155A	1
USA/WA-OHSU-0035/2020|EPI_ISL_468083|2020-04-17		Fuyang	1		hCoV-19/England/CAMB-7815B/2020|EPI_ISL_441112|2020-03-31	V24L		hCoV-19/England/CAMB-73E1D/2020|EPI_ISL_440330|2020-03-18	1																						USA/UT-03439/2020|EPI_ISL_512779|2020-04-19	C12T		Wales/PHWC-2B01E/2020|EPI_ISL_432265|2020-04-08	1		C160T	1
Australia/SAP273/2020|EPI_ISL_468029|2020-03-25		Zambia	1		hCoV-19/England/SHEF-C4378/2020|EPI_ISL_441960|2020-04-11	V24M		hCoV-19/England/CAMB-1ADB21/2020|EPI_ISL_448035|2020-05-01	1																						USA/UT-04139/2020|EPI_ISL_493038|2020-05-13	C12T		Wales/PHWC-31710/2020|EPI_ISL_446478|2020-04-13	1		T165C	1
USA/CA-CZB-1116/2020|EPI_ISL_444074|2020-04-30		Iraq	1		hCoV-19/England/CAMB-1B03C9/2020|EPI_ISL_459284|2020-05-01	V24M		hCoV-19/England/CAMB-1B0A2E/2020|EPI_ISL_452929|2020-05-12	1																						USA/UT-02866/2020|EPI_ISL_513671|2020-04-29	C12T		USA/UT-01887/2020|EPI_ISL_470744|2020-04-13	1		T166C	1
USA/MD-HP00024/2020|EPI_ISL_434685|2020-03-20		Cameroon	1		hCoV-19/England/CAMB-1AB938/2020|EPI_ISL_470160|2020-04-20	V24M		hCoV-19/England/CAMB-7815B/2020|EPI_ISL_441112|2020-03-31	1																						USA/UT-04137/2020|EPI_ISL_493036|2020-05-13	C12T		USA/UT-01848/2020|EPI_ISL_470690|2020-04-13	1		T174C	1
Sweden/20-07025/2020|EPI_ISL_434663|2020-04-06					hCoV-19/England/SHEF-C8374/2020|EPI_ISL_432862|2020-03-23	V24M		hCoV-19/England/SHEF-C4378/2020|EPI_ISL_441960|2020-04-11	1																						USA/UT-02885/2020|EPI_ISL_509530|2020-04-30	C12T		USA/UT-02569/2020|EPI_ISL_487217|2020-04-25	1		G182T	1
USA/VA-DCLS-0046/2020|EPI_ISL_420027|2020-03-28					hCoV-19/England/SHEF-C3494/2020|EPI_ISL_432773|2020-03-28	V24M		hCoV-19/England/CAMB-1B03C9/2020|EPI_ISL_459284|2020-05-01	1																						USA/UT-02894/2020|EPI_ISL_513685|2020-04-30	C12T		USA/UT-04006/2020|EPI_ISL_483020|2020-05-11	1		T185A	1
Bangladesh/BCSIR-NILMRC_207/2020|EPI_ISL_483689|2020-06-27					hCoV-19/England/CAMB-1B0402/2020|EPI_ISL_459318|2020-05-01	V24M		hCoV-19/England/CAMB-1AB938/2020|EPI_ISL_470160|2020-04-20	1																						USA/UT-04134/2020|EPI_ISL_493033|2020-05-13	C12T		USA/UT-0370/2020|EPI_ISL_430039|2020-03-30	1		T186C	1
Spain/ACoruna_009/2020|EPI_ISL_468339|2020-04-22					hCoV-19/England/SHEF-C343A/2020|EPI_ISL_432770|2020-03-23	V24M		hCoV-19/England/SHEF-C8374/2020|EPI_ISL_432862|2020-03-23	1																						USA/UT-02848/2020|EPI_ISL_513657|2020-04-29	C12T		USA/UT-02224/2020|EPI_ISL_436924|2020-04-15	1		A191G	1
England/CAMB-7B2FB/2020|EPI_ISL_444396|2020-04-09					hCoV-19/England/SHEF-C177F/2020|EPI_ISL_441911|2020-03-25	V24M		hCoV-19/England/SHEF-C3494/2020|EPI_ISL_432773|2020-03-28	1																						USA/UT-03002/2020|EPI_ISL_513700|2020-05-01	C12T		USA/UT-02136/2020|EPI_ISL_470708|2020-04-14	1		T192G	1
England/LOND-D41B7/2020|EPI_ISL_444097|2020-04-06					hCoV-19/Wales/PHWC-15CE64/2020|EPI_ISL_472629|2020-05-02	V24A		hCoV-19/England/CAMB-1B0402/2020|EPI_ISL_459318|2020-05-01	1																						USA/UT-04138/2020|EPI_ISL_493037|2020-05-13	C12T		Brazil/PA164684-IEC/2020|EPI_ISL_458148|2020-04-27	1		C193A	1
England/LOND-D406F/2020|EPI_ISL_444089|2020-04-04					hCoV-19/England/SHEF-C07E9/2020|EPI_ISL_420160|2020-03-27	V24M		hCoV-19/England/SHEF-C343A/2020|EPI_ISL_432770|2020-03-23	1																						USA/UT-CDC-9757/2020|EPI_ISL_509694|2020-04-29	C12T		England/BIRM-5EE63/2020|EPI_ISL_456658|2020	1		G208A	1
England/LOND-D3FEB/2020|EPI_ISL_444081|2020-04-04					hCoV-19/England/SHEF-C8A06/2020|EPI_ISL_442034|2020-03-27	V24M		hCoV-19/England/SHEF-C177F/2020|EPI_ISL_441911|2020-03-25	1																						USA/UT-CDC-9750/2020|EPI_ISL_509691|2020-04-25	C12T		USA/UT-01885/2020|EPI_ISL_470705|2020-04-13	1		T209C	1
USA/TX-HMH061/2020|EPI_ISL_434770|2020-03-18					hCoV-19/England/SHEF-C16FA/2020|EPI_ISL_441910|2020-03-28	V24M		hCoV-19/Wales/PHWC-15CE64/2020|EPI_ISL_472629|2020-05-02	1																						USA/UT-04141/2020|EPI_ISL_493040|2020-05-13	C12T		USA/UT-02437/2020|EPI_ISL_470552|2020-04-21	1		C212A	1
USA/TX-HMH053/2020|EPI_ISL_434762|2020-03-17					hCoV-19/Spain/Zaragoza2468/2020|EPI_ISL_468766|2020-03-27	V24L		hCoV-19/England/SHEF-C07E9/2020|EPI_ISL_420160|2020-03-27	1																						USA/UT-04015/2020|EPI_ISL_493026|2020-05-11	C12T		England/20204052504/2020|EPI_ISL_465650|2020-05-06	1		G214A	1
USA/TX-HMH045/2020|EPI_ISL_434754|2020-03-18					hCoV-19/England/SHEF-C905E/2020|EPI_ISL_442039|2020-03-26	V24M		hCoV-19/England/SHEF-C8A06/2020|EPI_ISL_442034|2020-03-27	1																						USA/TX-DSHS-0015/2020|EPI_ISL_515260|2020-05-08	C12T		USA/UT-02574/2020|EPI_ISL_487220|2020-04-25	1		A215T	1
USA/TX-HMH037/2020|EPI_ISL_434746|2020-03-08					hCoV-19/England/SHEF-C129C/2020|EPI_ISL_441906|2020-04-02	V24M		hCoV-19/England/SHEF-C16FA/2020|EPI_ISL_441910|2020-03-28	1																						USA/TX-DSHS-0012/2020|EPI_ISL_515258|2020-05-08	C12T		USA/UT-01853/2020|EPI_ISL_470658|2020-04-13	1		A215C	1
USA/TX-HMH029/2020|EPI_ISL_434738|2020-03-12					hCoV-19/Brazil/PE-IAM67/2020|EPI_ISL_500483|2020-04-08	V24L		hCoV-19/Spain/Zaragoza2468/2020|EPI_ISL_468766|2020-03-27	1																						USA/UT-04135/2020|EPI_ISL_493034|2020-05-13	C12T		USA/UT-0511/2020|EPI_ISL_430058|2020-04-03	1		T216C	1
USA/TX-HMH020/2020|EPI_ISL_434730|2020-03-13					hCoV-19/Brazil/PE-IAM356/2020|EPI_ISL_500875|2020-04-13	V24L		hCoV-19/England/SHEF-C905E/2020|EPI_ISL_442039|2020-03-26	1																						USA/UT-02846/2020|EPI_ISL_513655|2020-04-29	C12T		England/BRIS-1267C2/2020|EPI_ISL_458972|2020-04-09	1		C217G	1
USA/TX-HMH011/2020|EPI_ISL_434722|2020-03-13					hCoV-19/Spain/COV003718/2020|EPI_ISL_467242|2020-04-03	V25A		hCoV-19/England/SHEF-C129C/2020|EPI_ISL_441906|2020-04-02	1																						USA/UT-02546/2020|EPI_ISL_493118|2020-04-23	C12T		Netherlands/Gelderland_25/2020|EPI_ISL_460925|2020-04-24	1		T219C	1
USA/TX-HMH03/2020|EPI_ISL_434714|2020-03-16					hCoV-19/Canada/NB_55/2020|EPI_ISL_482472|2020-03-15	V25A		hCoV-19/Brazil/PE-IAM67/2020|EPI_ISL_500483|2020-04-08	1																						USA/UT-04136/2020|EPI_ISL_493035|2020-05-13	C12T		USA/UT-04131/2020|EPI_ISL_493030|2020-05-13	1		C220G	1
Spain/ACoruna_004/2020|EPI_ISL_468334|2020-04-29					hCoV-19/England/201161554/2020|EPI_ISL_464858|2020-03-11	V25A		hCoV-19/Brazil/PE-IAM356/2020|EPI_ISL_500875|2020-04-13	1																						USA/UT-03826/2020|EPI_ISL_493022|2020-05-09	C12T		USA/UT-03356/2020|EPI_ISL_498650|2020-04-23	1		T221C	1
Switzerland/120239/2020|EPI_ISL_468300|2020-05-01					hCoV-19/England/CAMB-7576B/2020|EPI_ISL_440468|2020-03-13	V25A		hCoV-19/Spain/COV003718/2020|EPI_ISL_467242|2020-04-03	1																						USA/UT-03004/2020|EPI_ISL_498676|2020-04-30	C12T		USA/UT-02895/2020|EPI_ISL_513686|2020-04-29	1		C225T	1
England/CAMB-1AC1C6/2020|EPI_ISL_444381|2020-04-28					hCoV-19/England/SHEF-C9DC0/2020|EPI_ISL_442349|2020-03-26	V25A		hCoV-19/Canada/NB_55/2020|EPI_ISL_482472|2020-03-15	1																						USA/UT-01856/2020|EPI_ISL_498630|2020-04-13	C12T		USA/UT-02757/2020|EPI_ISL_513644|2020-04-29	1
England/CAMB-1AC0F6/2020|EPI_ISL_444372|2020-04-28					hCoV-19/England/LOND-124D20C/2020|EPI_ISL_507068|2020-03-23	V25A		hCoV-19/England/201161554/2020|EPI_ISL_464858|2020-03-11	1																						USA/UT-03836/2020|EPI_ISL_509598|2020-04-01	C12T		USA/UT-02853/2020|EPI_ISL_513661|2020-04-29	1
England/CAMB-1AC050/2020|EPI_ISL_444364|2020-04-27					hCoV-19/USA/LA-SR0319/2020|EPI_ISL_450174|2020-04-04	F26L		hCoV-19/England/CAMB-7576B/2020|EPI_ISL_440468|2020-03-13	1																						USA/UT-02863/2020|EPI_ISL_513669|2020-04-29	C12T		USA/UT-02847/2020|EPI_ISL_513656|2020-04-29	1
England/CAMB-1ABFCD/2020|EPI_ISL_444356|2020-04-27					hCoV-19/USA/LA-BIE-080/2020|EPI_ISL_436948|2020-04-06	F26L		hCoV-19/England/SHEF-C9DC0/2020|EPI_ISL_442349|2020-03-26	1																						Vietnam/VNHN_0897/2020|EPI_ISL_511894|2020-03-16	C12T		USA/UT-04140/2020|EPI_ISL_493039|2020-05-13	1
England/CAMB-1ABF27/2020|EPI_ISL_444348|2020-04-26					hCoV-19/Wales/PHWC-368EB/2020|EPI_ISL_474728|2020-04-28	F26L		hCoV-19/England/LOND-124D20C/2020|EPI_ISL_507068|2020-03-23	1																						USA/FL-AFFG/2020|EPI_ISL_513282|2020-06-29	C12T		USA/UT-02448/2020|EPI_ISL_493089|2020-04-22	1
England/CAMB-1ABEA2/2020|EPI_ISL_444340|2020-04-27					hCoV-19/USA/LA-BIE-046/2020|EPI_ISL_463294|2020-04-06	F26L		hCoV-19/USA/LA-SR0319/2020|EPI_ISL_450174|2020-04-04	1																						USA/UT-02711/2020|EPI_ISL_513642|2020-04-28	C12T		USA/UT-01857/2020|EPI_ISL_498631|2020-04-13	1
USA/CA-CZB-1442/2020|EPI_ISL_468409|2020-03-28					hCoV-19/Spain/MD-006423/2020|EPI_ISL_510138|2020-04-11	F26L		hCoV-19/USA/LA-BIE-080/2020|EPI_ISL_436948|2020-04-06	1																						USA/UT-02452/2020|EPI_ISL_493093|2020-04-22	C12T		USA/UT-02861/2020|EPI_ISL_513667|2020-04-29	1
England/CAMB-80F1A/2020|EPI_ISL_444447|2020-04-16					hCoV-19/England/CAMB-720EB/2020|EPI_ISL_439629|2020-03-28	L27F		hCoV-19/Wales/PHWC-368EB/2020|EPI_ISL_474728|2020-04-28	1																						USA/UT-03745/2020|EPI_ISL_509584|2020-04-06	C12T		USA/UT-CDC-9782/2020|EPI_ISL_509709|2020-05-06	1
England/CAMB-80E95/2020|EPI_ISL_444439|2020-04-16					hCoV-19/DRC/1151/2020|EPI_ISL_447596|2020-04-05	L27S		hCoV-19/USA/LA-BIE-046/2020|EPI_ISL_463294|2020-04-06	1																						USA/UT-02889/2020|EPI_ISL_513681|2020-04-30	C12T		USA/UT-CDC-9755/2020|EPI_ISL_509692|2020-04-27	1
England/CAMB-7FEC6/2020|EPI_ISL_444430|2020-04-18					hCoV-19/England/CAMB-78D93/2020|EPI_ISL_441084|2020-04-03	L27F		hCoV-19/Spain/MD-006423/2020|EPI_ISL_510138|2020-04-11	1																						USA/UT-02450/2020|EPI_ISL_493091|2020-04-22	C12T		USA/UT-02849/2020|EPI_ISL_513658|2020-04-29	1
England/CAMB-7FE20/2020|EPI_ISL_444421|2020-04-19					hCoV-19/England/LIVE-A0363/2020|EPI_ISL_472104|2020-05-25	L28I		hCoV-19/England/CAMB-720EB/2020|EPI_ISL_439629|2020-03-28	1																						England/BRIS-1306F5/2020|EPI_ISL_492612|2020-04-12	C12T		USA/UT-04133/2020|EPI_ISL_493032|2020-05-13	1
England/CAMB-7FDAB/2020|EPI_ISL_444413|2020-04-20					hCoV-19/Wuhan/HB-WH2-154/2020|EPI_ISL_455373|2020-02-28	V29A		hCoV-19/DRC/1151/2020|EPI_ISL_447596|2020-04-05	1																						USA/UT-04132/2020|EPI_ISL_493031|2020-05-13	C12T		USA/TX-DSHS-0016/2020|EPI_ISL_515261|2020-05-08	1
England/CAMB-7FCF9/2020|EPI_ISL_444404|2020-04-19					hCoV-19/Scotland/EDB5849/2020|EPI_ISL_487668|2020-04-28	T30I		hCoV-19/England/CAMB-78D93/2020|EPI_ISL_441084|2020-04-03	1																						USA/UT-02842/2020|EPI_ISL_513652|2020-04-29	C12T		USA/UT-03354/2020|EPI_ISL_498649|2020-04-22	1
England/20130028203/2020|EPI_ISL_420495|2020-03-19					hCoV-19/Scotland/CVR2522/2020|EPI_ISL_490690|2020-04-15	T30I		hCoV-19/England/LIVE-A0363/2020|EPI_ISL_472104|2020-05-25	1																						USA/TX-DSHS-0004/2020|EPI_ISL_515253|2020-05-07	C12T		USA/UT-02841/2020|EPI_ISL_513651|2020-04-29	1
England/20129039902/2020|EPI_ISL_420487|2020-03-20					hCoV-19/England/NORT-292238/2020|EPI_ISL_457319|2020-05-08	T30I		hCoV-19/Wuhan/HB-WH2-154/2020|EPI_ISL_455373|2020-02-28	1																						USA/TX-DSHS-0009/2020|EPI_ISL_515256|2020-05-08	C12T		USA/UT-02756/2020|EPI_ISL_513643|2020-04-29	1
England/20128046302/2020|EPI_ISL_420479|2020-03-19					hCoV-19/Scotland/EDB5017/2020|EPI_ISL_453181|2020-05-15	T30I		hCoV-19/Scotland/EDB5849/2020|EPI_ISL_487668|2020-04-28	1																						USA/UT-02839/2020|EPI_ISL_513649|2020-04-29	C12T		USA/UT-02882/2020|EPI_ISL_509527|2020-04-30	1
England/20128033702/2020|EPI_ISL_420471|2020-03-18					hCoV-19/Spain/Albacete-COV003879/2020|EPI_ISL_474824|2020-05-20	T30I		hCoV-19/Scotland/CVR2522/2020|EPI_ISL_490690|2020-04-15	1																						USA/UT-02897/2020|EPI_ISL_513688|2020-04-30	C12T		USA/UT-02987/2020|EPI_ISL_509555|2020-05-01	1
England/20118137803/2020|EPI_ISL_420463|2020-03-12					hCoV-19/England/BRIS-1266A7/2020|EPI_ISL_458913|2020-04-08	T30I		hCoV-19/England/NORT-292238/2020|EPI_ISL_457319|2020-05-08	1																						USA/UT-02449/2020|EPI_ISL_493090|2020-04-22	C12T		USA/UT-03348/2020|EPI_ISL_498648|2020-04-21	1
Wales/PHWC-24BC9/2020|EPI_ISL_419496|2020-03-20					hCoV-19/England/BIRM-611CE/2020|EPI_ISL_473439|2020-06-02	T30I		hCoV-19/Scotland/EDB5017/2020|EPI_ISL_453181|2020-05-15	1																						USA/UT-02845/2020|EPI_ISL_513654|2020-04-29	C12T		USA/UT-02852/2020|EPI_ISL_513660|2020-04-29	1
Switzerland/120177/2020|EPI_ISL_468253|2020-04-27					hCoV-19/Sichuan/SC-PHCC2-044/2020|EPI_ISL_451364|2020-02-12	T30I		hCoV-19/Spain/Albacete-COV003879/2020|EPI_ISL_474824|2020-05-20	1																						USA/UT-03006/2020|EPI_ISL_513701|2020-04-30	C12T		USA/UT-04019/2020|EPI_ISL_493028|2020-05-11	1
Switzerland/120040/2020|EPI_ISL_468229|2020-04-20					hCoV-19/England/BRIS-1223C2/2020|EPI_ISL_440645|2020-04-04	T30A		hCoV-19/England/BRIS-1266A7/2020|EPI_ISL_458913|2020-04-08	1																						USA/UT-03345/2020|EPI_ISL_498647|2020-04-22	C12T		USA/UT-02840/2020|EPI_ISL_513650|2020-04-29	1
Switzerland/120029/2020|EPI_ISL_468221|2020-04-18					hCoV-19/England/BRIS-127187/2020|EPI_ISL_469580|2020-04-24	T30I		hCoV-19/England/BIRM-611CE/2020|EPI_ISL_473439|2020-06-02	1																						USA/TX-DSHS-0013/2020|EPI_ISL_515259|2020-05-08	C12T		USA/UT-02856/2020|EPI_ISL_513664|2020-04-29	1
Switzerland/120003/2020|EPI_ISL_468204|2020-04-17					hCoV-19/Netherlands/Zeeland_18/2020|EPI_ISL_461256|2020-04-03	T30I		hCoV-19/Sichuan/SC-PHCC2-044/2020|EPI_ISL_451364|2020-02-12	1																						USA/TX-DSHS-0005/2020|EPI_ISL_515254|2020-05-08	C12T		USA/UT-02850/2020|EPI_ISL_513659|2020-04-29	1
England/BIRM-5E364/2020|EPI_ISL_444289|2020-04-15					hCoV-19/England/20144035204/2020|EPI_ISL_421944|2020-03-31	T30I		hCoV-19/England/BRIS-1223C2/2020|EPI_ISL_440645|2020-04-04	1																						USA/UT-CDC-9756/2020|EPI_ISL_509693|2020-04-28	C12T		USA/FL-AFFD/2020|EPI_ISL_513281|2020-06-29	1
England/BIRM-5E2B2/2020|EPI_ISL_444280|2020-04-16					hCoV-19/England/NORW-EB4D2/2020|EPI_ISL_457437|2020-05-01	T30I		hCoV-19/England/BRIS-127187/2020|EPI_ISL_469580|2020-04-24	1																						USA/UT-CDC-9749/2020|EPI_ISL_509690|2020-04-24	C12T		India/GBRC345/2020|EPI_ISL_514587|2020-06-18	1
England/LOND-D5F70/2020|EPI_ISL_444266|2020-04-19					hCoV-19/England/NORT-291FF6/2020|EPI_ISL_489065|2020-05-07	T30I		hCoV-19/Netherlands/Zeeland_18/2020|EPI_ISL_461256|2020-04-03	1																						USA/UT-03436/2020|EPI_ISL_498665|2020-04-21	C12T		USA/UT-01819/2020|EPI_ISL_509570|2020-04-09	1
England/LOND-D5EDD/2020|EPI_ISL_444258|2020-04-19					hCoV-19/England/BRIS-12AF02/2020|EPI_ISL_458307|2020-05-01	T30A		hCoV-19/England/20144035204/2020|EPI_ISL_421944|2020-03-31	1																						USA/UT-02430/2020|EPI_ISL_493087|2020-04-21	C12T		USA/UT-03786/2020|EPI_ISL_509593|2020-04-05	1
England/LOND-D5E37/2020|EPI_ISL_444250|2020-04-19					hCoV-19/England/CAMB-1B2D7E/2020|EPI_ISL_456723|2020-05-19	T30I		hCoV-19/England/NORW-EB4D2/2020|EPI_ISL_457437|2020-05-01	1																						USA/TX-DSHS-0011/2020|EPI_ISL_515257|2020-05-08	C12T		USA/UT-03453/2020|EPI_ISL_509578|2020-04-20	1
England/LOND-D5550/2020|EPI_ISL_444233|2020-04-16					hCoV-19/Saudi_Arabia/KAUST-Jeddah76/2020|EPI_ISL_437760|2020-04-01	T30I		hCoV-19/England/BRIS-12AF02/2020|EPI_ISL_458307|2020-05-01	1																						USA/TX-DSHS-0008/2020|EPI_ISL_515255|2020-05-08	C12T		Australia/NSW2004/2020|EPI_ISL_500596|2020-03-15	1
England/LOND-D549F/2020|EPI_ISL_444225|2020-04-15					hCoV-19/England/LIVE-A065B/2020|EPI_ISL_472124|2020-05-27	T30I		hCoV-19/England/CAMB-1B2D7E/2020|EPI_ISL_456723|2020-05-19	1																						USA/UT-04016/2020|EPI_ISL_493027|2020-05-11	C12T		England/BRIS-13007F/2020|EPI_ISL_492545|2020-04-11	1
England/LOND-D53CF/2020|EPI_ISL_444216|2020-04-15					hCoV-19/Shanghai/SH0045/2020|EPI_ISL_416354|2020-02-04	T30I		hCoV-19/Saudi_Arabia/KAUST-Jeddah76/2020|EPI_ISL_437760|2020-04-01	1																						USA/UT-02708/2020|EPI_ISL_513641|2020-04-28	C12T		England/BRIS-130710/2020|EPI_ISL_492613|2020-04-12	1
Wales/PHWC-246B9/2020|EPI_ISL_419440|2020-03-17					hCoV-19/England/BRIS-1285E4/2020|EPI_ISL_469731|2020-04-17	T30A		hCoV-19/Shanghai/SH0045/2020|EPI_ISL_416354|2020-02-04	1																						USA/UT-03775/2020|EPI_ISL_509587|2020-04-01	C12T		England/BRIS-18536C5/2020|EPI_ISL_492301|2020-04-10	1
Switzerland/120231/2020|EPI_ISL_468292|2020-05-01					hCoV-19/England/BRIS-1223B3/2020|EPI_ISL_440795|2020-04-04	T30A		hCoV-19/England/BRIS-1285E4/2020|EPI_ISL_469731|2020-04-17	1																						USA/UT-01859/2020|EPI_ISL_498632|2020-04-13	C12T		USA/UT-03439/2020|EPI_ISL_512779|2020-04-19	1
Switzerland/120203/2020|EPI_ISL_468276|2020-04-28					hCoV-19/England/OXON-B0087/2020|EPI_ISL_478851|2020-04-26	T30I		hCoV-19/England/BRIS-1223B3/2020|EPI_ISL_440795|2020-04-04	1																						USA/UT-03341/2020|EPI_ISL_498646|2020-04-22	C12T		USA/UT-04139/2020|EPI_ISL_493038|2020-05-13	1
Switzerland/120194/2020|EPI_ISL_468268|2020-04-27					hCoV-19/USA/LA-BIE-028/2020|EPI_ISL_468717|2020-04-04	T30I		hCoV-19/England/OXON-B0087/2020|EPI_ISL_478851|2020-04-26	1																						USA/UT-06239/2020|EPI_ISL_493121|2020-04-23	C12T		USA/UT-02866/2020|EPI_ISL_513671|2020-04-29	1
Switzerland/120185/2020|EPI_ISL_468260|2020-04-27					hCoV-19/Saudi_Arabia/KAUST-Jeddah75/2020|EPI_ISL_437759|2020-04-01	T30I		hCoV-19/USA/LA-BIE-028/2020|EPI_ISL_468717|2020-04-04	1																						USA/UT-02454/2020|EPI_ISL_493095|2020-04-23	C12T		USA/UT-04137/2020|EPI_ISL_493036|2020-05-13	1
Switzerland/120006/2020|EPI_ISL_468207|2020-04-17					hCoV-19/England/NORW-EBD5F/2020|EPI_ISL_457505|2020-05-06	T30I		hCoV-19/Saudi_Arabia/KAUST-Jeddah75/2020|EPI_ISL_437759|2020-04-01	1																						USA/UT-02759/2020|EPI_ISL_513645|2020-04-29	C12T		USA/UT-02885/2020|EPI_ISL_509530|2020-04-30	1
England/CAMB-1AB6E6/2020|EPI_ISL_444327|2020-04-27					hCoV-19/England/BRIS-12A2BE/2020|EPI_ISL_458303|2020-04-15	T30I		hCoV-19/England/NORW-EBD5F/2020|EPI_ISL_457505|2020-05-06	1																						USA/UT-02854/2020|EPI_ISL_513662|2020-04-29	C12T		USA/UT-02894/2020|EPI_ISL_513685|2020-04-30	1
England/BIRM-5E80B/2020|EPI_ISL_444305|2020-03-24					hCoV-19/England/BRIS-1223D1/2020|EPI_ISL_440676|2020-04-04	T30A		hCoV-19/England/BRIS-12A2BE/2020|EPI_ISL_458303|2020-04-15	1																						USA/UT-03010/2020|EPI_ISL_513702|2020-04-30	C12T		USA/UT-04134/2020|EPI_ISL_493033|2020-05-13	1
England/LOND-D5D49/2020|EPI_ISL_444244|2020-04-19					hCoV-19/England/BRIS-1223E0/2020|EPI_ISL_440758|2020-04-04	T30A		hCoV-19/England/BRIS-1223D1/2020|EPI_ISL_440676|2020-04-04	1																						USA/UT-02973/2020|EPI_ISL_498675|2020-05-01	C12T		USA/UT-02848/2020|EPI_ISL_513657|2020-04-29	1
USA/TX-HMH0408/2020|EPI_ISL_434994|2020-03-31					hCoV-19/Hungary/SRC-00417/2020|EPI_ISL_435409|2020-03-25	T30I		hCoV-19/England/BRIS-1223E0/2020|EPI_ISL_440758|2020-04-04	1																						USA/UT-06241/2020|EPI_ISL_493122|2020-04-22	C12T		USA/UT-03002/2020|EPI_ISL_513700|2020-05-01	1
USA/TX-HMH0399/2020|EPI_ISL_434986|2020-03-31					hCoV-19/England/BRIS-1223FF/2020|EPI_ISL_440802|2020-04-04	T30A		hCoV-19/Hungary/SRC-00417/2020|EPI_ISL_435409|2020-03-25	1																						USA/UT-03827/2020|EPI_ISL_493023|2020-05-09	C12T		USA/UT-04138/2020|EPI_ISL_493037|2020-05-13	1
USA/TX-HMH0391/2020|EPI_ISL_434978|2020-03-27					hCoV-19/England/BRIS-12DB92/2020|EPI_ISL_481813|2020-06-01	T30I		hCoV-19/England/BRIS-1223FF/2020|EPI_ISL_440802|2020-04-04	1																						USA/UT-02707/2020|EPI_ISL_513640|2020-04-28	C12T		USA/UT-CDC-9757/2020|EPI_ISL_509694|2020-04-29	1
USA/TX-HMH0305/2020|EPI_ISL_434926|2020-03-28					hCoV-19/USA/WA-S1551/2020|EPI_ISL_495977|2020-05-26	T30I		hCoV-19/England/BRIS-12DB92/2020|EPI_ISL_481813|2020-06-01	1																						USA/UT-02860/2020|EPI_ISL_513666|2020-04-29	C12T		USA/UT-CDC-9750/2020|EPI_ISL_509691|2020-04-25	1
USA/TX-HMH0292/2020|EPI_ISL_434918|2020-03-27					hCoV-19/England/BRIS-13270F/2020|EPI_ISL_492188|2020-06-10	T30I		hCoV-19/USA/WA-S1551/2020|EPI_ISL_495977|2020-05-26	1																						USA/UT-02862/2020|EPI_ISL_513668|2020-04-29	C12T		USA/UT-04141/2020|EPI_ISL_493040|2020-05-13	1
USA/TX-HMH0282/2020|EPI_ISL_434910|2020-03-27					hCoV-19/England/BRIS-185470D/2020|EPI_ISL_495101|2020-05-01	T30A		hCoV-19/England/BRIS-13270F/2020|EPI_ISL_492188|2020-06-10	1																						USA/UT-02855/2020|EPI_ISL_513663|2020-04-29	C12T		USA/UT-04015/2020|EPI_ISL_493026|2020-05-11	1
USA/TX-HMH0274/2020|EPI_ISL_434902|2020-03-27					hCoV-19/USA/WA-S1473/2020|EPI_ISL_495648|2020-05-12	T30I		hCoV-19/England/BRIS-185470D/2020|EPI_ISL_495101|2020-05-01	1																						USA/UT-02844/2020|EPI_ISL_513653|2020-04-29	C12T		USA/TX-DSHS-0015/2020|EPI_ISL_515260|2020-05-08	1
Scotland/EDB6209/2020|EPI_ISL_473914|2020-05-18					hCoV-19/Russia/StPetersburg-RII3524VR4/2020|EPI_ISL_507291|2020-03-15	T30I		hCoV-19/USA/WA-S1473/2020|EPI_ISL_495648|2020-05-12	1																						USA/UT-02857/2020|EPI_ISL_513665|2020-04-29	C12T		USA/TX-DSHS-0012/2020|EPI_ISL_515258|2020-05-08	1
Scotland/EDB6184/2020|EPI_ISL_473906|2020-05-17					hCoV-19/England/BRIS-1326F3/2020|EPI_ISL_511962|2020-06-11	T30I		hCoV-19/Russia/StPetersburg-RII3524VR4/2020|EPI_ISL_507291|2020-03-15	1																						USA/UT-02451/2020|EPI_ISL_493092|2020-04-22	C12T		USA/UT-04135/2020|EPI_ISL_493034|2020-05-13	1
England/CAMB-1AB76B/2020|EPI_ISL_444330|2020-04-28					hCoV-19/Scotland/CVR3660/2020|EPI_ISL_478087|2020-05-22	L31P		hCoV-19/England/BRIS-1326F3/2020|EPI_ISL_511962|2020-06-11	1																						USA/UT-03443/2020|EPI_ISL_509575|2020-04-16	C12T		USA/UT-02846/2020|EPI_ISL_513655|2020-04-29	1
England/CAMB-1AAD2E/2020|EPI_ISL_444317|2020-04-27					hCoV-19/England/LOND-D88CD/2020|EPI_ISL_492747|2020-04-23	L31I		hCoV-19/Scotland/CVR3660/2020|EPI_ISL_478087|2020-05-22	1																						Australia/NSW757/2020|EPI_ISL_513399|2020-07-19	C12T		USA/UT-02546/2020|EPI_ISL_493118|2020-04-23	1
USA/TX-HMH0385/2020|EPI_ISL_434973|2020-03-30					hCoV-19/England/BRIS-12D9B6/2020|EPI_ISL_481928|2020-05-07	A32V		hCoV-19/England/LOND-D88CD/2020|EPI_ISL_492747|2020-04-23	1																						Canada/BC_21355315/2020|EPI_ISL_477023|2020-04	G13A		USA/UT-04136/2020|EPI_ISL_493035|2020-05-13	1
USA/TX-HMH0376/2020|EPI_ISL_434965|2020-03-30					hCoV-19/Iran/IRVSH-01/2020|EPI_ISL_507007|2020-05-01	I33T		hCoV-19/England/BRIS-12D9B6/2020|EPI_ISL_481928|2020-05-07	1																						Canada/BC_19196568/2020|EPI_ISL_469220|2020-04	G13A		USA/UT-03826/2020|EPI_ISL_493022|2020-05-09	1
USA/TX-HMH0365/2020|EPI_ISL_434957|2020-03-30					hCoV-19/Wuhan/HB-WHCM-111/2020|EPI_ISL_455404|2020-03-02	L34F		hCoV-19/Iran/IRVSH-01/2020|EPI_ISL_507007|2020-05-01	1																						England/SHEF-C4AEC/2020|EPI_ISL_479211|2020-06-02	G13T		USA/UT-03004/2020|EPI_ISL_498676|2020-04-30	1
USA/TX-HMH0355/2020|EPI_ISL_434949|2020-03-29					hCoV-19/Netherlands/Gelderland_39/2020|EPI_ISL_460939|2020-04-22	A36V		hCoV-19/Wuhan/HB-WHCM-111/2020|EPI_ISL_455404|2020-03-02	1																						USA/FL-BPHL-0327/2020|EPI_ISL_489736|2020-04-17	G13A		USA/UT-01856/2020|EPI_ISL_498630|2020-04-13	1
USA/TX-HMH0347/2020|EPI_ISL_434941|2020-04-01					hCoV-19/USA/VA-DCLS-0056/2020|EPI_ISL_426464|2020-04-01	A36V		hCoV-19/Netherlands/Gelderland_39/2020|EPI_ISL_460939|2020-04-22	1																						Canada/BC_19803546/2020|EPI_ISL_469223|2020-04	G13A		USA/UT-03836/2020|EPI_ISL_509598|2020-04-01	1
USA/TX-HMH0320/2020|EPI_ISL_434933|2020-03-28					hCoV-19/England/BIRM-5FE53/2020|EPI_ISL_461529|2020	L37H		hCoV-19/USA/VA-DCLS-0056/2020|EPI_ISL_426464|2020-04-01	1																						Wales/PHWC-3175C/2020|EPI_ISL_446481|2020-04-13	G13A		USA/UT-02863/2020|EPI_ISL_513669|2020-04-29	1
Belgium/UGent-36/2020|EPI_ISL_434354|2020-03-27					hCoV-19/Netherlands/NA_79/2020|EPI_ISL_422839|2020-03-10	L37F		hCoV-19/England/BIRM-5FE53/2020|EPI_ISL_461529|2020	1																						Canada/BC_21358214/2020|EPI_ISL_477024|2020-04	G13A		Vietnam/VNHN_0897/2020|EPI_ISL_511894|2020-03-16	1
USA/WA-S585/2020|EPI_ISL_434345|2020-03-26					hCoV-19/England/NOTT-111C70/2020|EPI_ISL_472391|2020-06-03	L37F		hCoV-19/Netherlands/NA_79/2020|EPI_ISL_422839|2020-03-10	1																						Egypt/HCoV2-Egy-002/2020|EPI_ISL_510532|2020-06-02	G13T		USA/FL-AFFG/2020|EPI_ISL_513282|2020-06-29	1
USA/WA-S577/2020|EPI_ISL_434337|2020-03-28					hCoV-19/South_Korea/SNU01/2020|EPI_ISL_411929|2020-01	L37H		hCoV-19/England/NOTT-111C70/2020|EPI_ISL_472391|2020-06-03	1																						USA/WI-UW-897/2020|EPI_ISL_509899|2020-07-12	G13A		USA/UT-02711/2020|EPI_ISL_513642|2020-04-28	1
USA/CA-ALSR-0711-SAN/2020|EPI_ISL_483318|2020-03-30					hCoV-19/USA/WA-UW306/2020|EPI_ISL_418874|2020-03-16	L37R		hCoV-19/South_Korea/SNU01/2020|EPI_ISL_411929|2020-01	1																						Egypt/Army-MCL001/2020|EPI_ISL_510526|2020-06-01	G13T		USA/UT-02452/2020|EPI_ISL_493093|2020-04-22	1
Scotland/EDB6383/2020|EPI_ISL_473949|2020-04-30					hCoV-19/USA/WI-WSLH-200066/2020|EPI_ISL_471231|2020-04-15	L37F		hCoV-19/USA/WA-UW306/2020|EPI_ISL_418874|2020-03-16	1																						Switzerland/190016_541_E4/2020|EPI_ISL_500881|2020-07-06	G13C		USA/UT-03745/2020|EPI_ISL_509584|2020-04-06	1
Scotland/EDB6327/2020|EPI_ISL_473937|2020-06-01					hCoV-19/Greece/43_35679/2020|EPI_ISL_437874|2020-03-20	L39M		hCoV-19/USA/WI-WSLH-200066/2020|EPI_ISL_471231|2020-04-15	1																						Brazil/RJ-DCVN5/2020|EPI_ISL_510536|2020-07-20	T14C		USA/UT-02889/2020|EPI_ISL_513681|2020-04-30	1
Scotland/EDB6245/2020|EPI_ISL_473927|2020-05-21					hCoV-19/England/BRIS-12F4D1/2020|EPI_ISL_488265|2020-04-13	A41S		hCoV-19/Greece/43_35679/2020|EPI_ISL_437874|2020-03-20	1																						Brazil/RJ-DCVN4/2020|EPI_ISL_510541|2020-07-20	T14C		USA/UT-02450/2020|EPI_ISL_493091|2020-04-22	1
Belgium/ITM_C285/2020|EPI_ISL_434379|2020-04-03					hCoV-19/England/BRIS-12F26E/2020|EPI_ISL_488372|2020-04-13	A41S		hCoV-19/England/BRIS-12F4D1/2020|EPI_ISL_488265|2020-04-13	1																						Canada/ON_VIDO-01/2020|EPI_ISL_413015|2020-01-23	C17T		England/BRIS-1306F5/2020|EPI_ISL_492612|2020-04-12	1
Belgium/ITM_C305/2020|EPI_ISL_434370|2020-04-05					hCoV-19/Mali/M002659/2020|EPI_ISL_487451|2020-04-09	A41V		hCoV-19/England/BRIS-12F26E/2020|EPI_ISL_488372|2020-04-13	1																						Sweden/20-19008/2020|EPI_ISL_469064|2020-05-27	G18A		USA/UT-04132/2020|EPI_ISL_493031|2020-05-13	1
Belgium/UGent-45/2020|EPI_ISL_434361|2020-03-29					hCoV-19/England/NOTT-112583/2020|EPI_ISL_484396|2020-04-27	A41V		hCoV-19/Mali/M002659/2020|EPI_ISL_487451|2020-04-09	1																						France/HF3141/2020|EPI_ISL_420057|2020-03-22	G18A		USA/UT-02842/2020|EPI_ISL_513652|2020-04-29	1
USA/WA-S571/2020|EPI_ISL_434331|2020-03-30					hCoV-19/England/BRIS-12DF96/2020|EPI_ISL_482019|2020-04-19	A41V		hCoV-19/England/NOTT-112583/2020|EPI_ISL_484396|2020-04-27	1																						England/NORW-ED801/2020|EPI_ISL_490498|2020	G18A		USA/TX-DSHS-0004/2020|EPI_ISL_515253|2020-05-07	1
USA/WA-S563/2020|EPI_ISL_434323|2020-03-31					hCoV-19/USA/WA-S296/2020|EPI_ISL_430150|2020-03-13	A41S		hCoV-19/England/BRIS-12DF96/2020|EPI_ISL_482019|2020-04-19	1																						England/BRIS-12AB68/2020|EPI_ISL_458481|2020-05-01	G18T		USA/TX-DSHS-0009/2020|EPI_ISL_515256|2020-05-08	1
USA/WA-S555/2020|EPI_ISL_434315|2020-03-30					hCoV-19/England/BRIS-12D87D/2020|EPI_ISL_481951|2020-05-06	A41S		hCoV-19/USA/WA-S296/2020|EPI_ISL_430150|2020-03-13	1																						England/BRIS-12B350/2020|EPI_ISL_487577|2020-05-03	G18T		USA/UT-02839/2020|EPI_ISL_513649|2020-04-29	1
USA/WA-S547/2020|EPI_ISL_434307|2020-03-24					hCoV-19/USA/WA-S1158/2020|EPI_ISL_463648|2020-05-04	A41V		hCoV-19/England/BRIS-12D87D/2020|EPI_ISL_481951|2020-05-06	1																						Wales/PHWC-2B2EB/2020|EPI_ISL_432315|2020-04-07	G18A		USA/UT-02897/2020|EPI_ISL_513688|2020-04-30	1
USA/CA-ALSR-0799-SAN/2020|EPI_ISL_483366|2020-04-02					hCoV-19/England/TBSD-2488E57/2020|EPI_ISL_482059|2020-04-28	A41S		hCoV-19/USA/WA-S1158/2020|EPI_ISL_463648|2020-05-04	1																						India/InStem_NCBS_0005/2020|EPI_ISL_477208|2020-06-01	G18T		USA/UT-02449/2020|EPI_ISL_493090|2020-04-22	1
Scotland/EDB5683/2020|EPI_ISL_473836|2020-05-28					hCoV-19/Wales/PHWC-2BB77/2020|EPI_ISL_445814|2020-03-28	A41S		hCoV-19/England/TBSD-2488E57/2020|EPI_ISL_482059|2020-04-28	1																						Spain/Logrono_h2361/2020|EPI_ISL_468761|2020-04-04	G18A		USA/UT-02845/2020|EPI_ISL_513654|2020-04-29	1
Belgium/ITM_C298/2020|EPI_ISL_434380|2020-04-04					hCoV-19/England/BRIS-12F4E0/2020|EPI_ISL_488309|2020-04-13	A41S		hCoV-19/Wales/PHWC-2BB77/2020|EPI_ISL_445814|2020-03-28	1																						USA/MN-MDH-585/2020|EPI_ISL_437382|2020-04-14	G18A		USA/UT-03006/2020|EPI_ISL_513701|2020-04-30	1
USA/WA-S492/2020|EPI_ISL_434252|2020-03-26					hCoV-19/Wales/PHWC-25515/2020|EPI_ISL_421001|2020-03-23	A41S		hCoV-19/England/BRIS-12F4E0/2020|EPI_ISL_488309|2020-04-13	1																						Scotland/GCVR-171AB0/2020|EPI_ISL_489392|2020-03-25	G18A		USA/UT-03345/2020|EPI_ISL_498647|2020-04-22	1
USA/WA-S484/2020|EPI_ISL_434244|2020-04-02					hCoV-19/England/BRIS-123C3F/2020|EPI_ISL_442779|2020-04-07	A41V		hCoV-19/Wales/PHWC-25515/2020|EPI_ISL_421001|2020-03-23	1																						Thailand/UDC302026-4/2020|EPI_ISL_451028|2020-04-12	G18A		USA/TX-DSHS-0013/2020|EPI_ISL_515259|2020-05-08	1
USA/WA-S476/2020|EPI_ISL_434236|2020-04-03					hCoV-19/USA/WA-S1409/2020|EPI_ISL_495859|2020-05-19	A41V		hCoV-19/England/BRIS-123C3F/2020|EPI_ISL_442779|2020-04-07	1																						England/OXON-B06FE/2020|EPI_ISL_478903|2020-04-20	G18A		USA/TX-DSHS-0005/2020|EPI_ISL_515254|2020-05-08	1
USA/WA-S468/2020|EPI_ISL_434228|2020-04-05					hCoV-19/England/BRIS-130859/2020|EPI_ISL_492595|2020-04-12	A41S		hCoV-19/USA/WA-S1409/2020|EPI_ISL_495859|2020-05-19	1																						Wales/PHWC-15D1D3/2020|EPI_ISL_472681|2020-04-08	G18A		USA/UT-CDC-9756/2020|EPI_ISL_509693|2020-04-28	1
USA/WA-S460/2020|EPI_ISL_434220|2020-04-05					hCoV-19/Malaysia/3998/2020|EPI_ISL_501210|2020-04-01	A41S		hCoV-19/England/BRIS-130859/2020|EPI_ISL_492595|2020-04-12	1																						USA/MN-MDH-621/2020|EPI_ISL_437383|2020-04-15	G18A		USA/UT-CDC-9749/2020|EPI_ISL_509690|2020-04-24	1
Scotland/EDB6133/2020|EPI_ISL_473878|2020-05-14					hCoV-19/USA/WA-UW-10381/2020|EPI_ISL_501088|2020-06-04	A41V		hCoV-19/Malaysia/3998/2020|EPI_ISL_501210|2020-04-01	1																						Wales/PHWC-3281C/2020|EPI_ISL_474354|2020-04-15	G18A		USA/UT-03436/2020|EPI_ISL_498665|2020-04-21	1
Scotland/EDB5900/2020|EPI_ISL_473870|2020-04-29					hCoV-19/England/NORT-295D52/2020|EPI_ISL_478662|2020-05-08	C43F		hCoV-19/USA/WA-UW-10381/2020|EPI_ISL_501088|2020-06-04	1																						England/BRIS-12EF86/2020|EPI_ISL_488248|2020-04-22	G18T		USA/UT-02430/2020|EPI_ISL_493087|2020-04-21	1
Scotland/EDB5842/2020|EPI_ISL_473862|2020-04-28					hCoV-19/England/LOND-D7002/2020|EPI_ISL_478452|2020-04-03	C43F		hCoV-19/England/NORT-295D52/2020|EPI_ISL_478662|2020-05-08	1																						England/NORW-EE3F0/2020|EPI_ISL_490538|2020	G18A		USA/TX-DSHS-0011/2020|EPI_ISL_515257|2020-05-08	1
Scotland/EDB5747/2020|EPI_ISL_473854|2020-06-02					hCoV-19/Morocco/RA85/2020|EPI_ISL_467299|2020-05-21	C43R		hCoV-19/England/LOND-D7002/2020|EPI_ISL_478452|2020-04-03	1																						England/CAMB-72713/2020|EPI_ISL_439658|2020-03-24	G18A		USA/TX-DSHS-0008/2020|EPI_ISL_515255|2020-05-08	1
Scotland/EDB5723/2020|EPI_ISL_473844|2020-04-11					hCoV-19/England/NORT-292247/2020|EPI_ISL_489064|2020-05-07	C43F		hCoV-19/England/NORT-292247/2020|EPI_ISL_489064|2020-05-07	1																						England/BRIS-12D01B/2020|EPI_ISL_481929|2020-04-25	G18T		USA/UT-04016/2020|EPI_ISL_493027|2020-05-11	1
Scotland/EDB5673/2020|EPI_ISL_473831|2020-04-12					hCoV-19/Australia/VIC1602/2020|EPI_ISL_456514|2020-05-10	C43S		hCoV-19/Australia/VIC1602/2020|EPI_ISL_456514|2020-05-10	1																						England/BRIS-12CE7C/2020|EPI_ISL_481793|2020-04-24	G18T		USA/UT-02708/2020|EPI_ISL_513641|2020-04-28	1
Scotland/EDB5442/2020|EPI_ISL_473822|2020-04-12					hCoV-19/SaudiArabia/KAUST-JEDDAH997/2020|EPI_ISL_513070|2020-06-17	C43F		hCoV-19/SaudiArabia/KAUST-JEDDAH997/2020|EPI_ISL_513070|2020-06-17	1																						India/IB14/2020|EPI_ISL_508292|2020-06-18	G18T		USA/UT-03775/2020|EPI_ISL_509587|2020-04-01	1
Scotland/EDB5157/2020|EPI_ISL_473813|2020-05-17					hCoV-19/SaudiArabia/KAUST-JEDDAH996/2020|EPI_ISL_513069|2020-06-17	C43F		hCoV-19/SaudiArabia/KAUST-JEDDAH996/2020|EPI_ISL_513069|2020-06-17	1																						Israel/CVL-n-7920/2020|EPI_ISL_475007|2020-04-13	G19A		USA/UT-01859/2020|EPI_ISL_498632|2020-04-13	1
Scotland/EDB4953/2020|EPI_ISL_473805|2020-05-14					hCoV-19/USA/CA-ALSR-1877/2020|EPI_ISL_512215|2020-05-20	C43F		hCoV-19/USA/CA-ALSR-1877/2020|EPI_ISL_512215|2020-05-20	1																						USA/WA-S165/2020|EPI_ISL_430203|2020-03-18	G19C		USA/UT-03341/2020|EPI_ISL_498646|2020-04-22	1
USA/CA-SR0412/2020|EPI_ISL_458282|2020-04-21					hCoV-19/USA/WA-S2462/2020|EPI_ISL_497094|2020-06-14	C43F		hCoV-19/USA/WA-S2462/2020|EPI_ISL_497094|2020-06-14	1																						Sweden/20-51167/2020|EPI_ISL_450832|2020-05-04	G19A		USA/UT-06239/2020|EPI_ISL_493121|2020-04-23	1
USA/CA-SR0402/2020|EPI_ISL_458274|2020-04-08					hCoV-19/Morocco/RA85/2020|EPI_ISL_467299|2020-05-21	C44Y		hCoV-19/India/nimh-14715/2020|EPI_ISL_486407|2020-05-10	1																						Austria/Graz-MUG7/2020|EPI_ISL_437203|2020-04-06	A21T		USA/UT-02454/2020|EPI_ISL_493095|2020-04-23	1
USA/CA-SR0387/2020|EPI_ISL_458266|2020-04-21					hCoV-19/Morocco/RA85/2020|EPI_ISL_467299|2020-05-21	N45R		hCoV-19/India/nimh-14712/2020|EPI_ISL_486406|2020-05-10	1																						USA/CA-SR016/2020|EPI_ISL_430016|2020-03-24	G22A		USA/UT-02759/2020|EPI_ISL_513645|2020-04-29	1
USA/CA-SR0351/2020|EPI_ISL_458238|2020-04-28					hCoV-19/India/nimh-14715/2020|EPI_ISL_486407|2020-05-10	I46V		hCoV-19/Shanghai/SH0071/2020|EPI_ISL_416374|2020-02-07	1																						USA/NM-UNM-00142/2020|EPI_ISL_467653|2020-04-03	A23G		USA/UT-02854/2020|EPI_ISL_513662|2020-04-29	1
England/OXON-AF188/2020|EPI_ISL_448817|2020-03-24					hCoV-19/India/nimh-14712/2020|EPI_ISL_486406|2020-05-10	I46V		hCoV-19/Austria/CeMM0342/2020|EPI_ISL_475803|2020-04-03	1																						England/CAMB-1B147A/2020|EPI_ISL_458525|2020-05-07	G24C		USA/UT-03010/2020|EPI_ISL_513702|2020-04-30	1
USA/WA-S516/2020|EPI_ISL_434276|2020-04-01					hCoV-19/Shanghai/SH0071/2020|EPI_ISL_416374|2020-02-07	I46F		hCoV-19/England/20169000804/2020|EPI_ISL_466625|2020-04-17	1																						Bangladesh/BCSIR-NILMRC_133/2020|EPI_ISL_480419|2020-06-18	G24T		USA/UT-02973/2020|EPI_ISL_498675|2020-05-01	1
USA/WA-S506/2020|EPI_ISL_434266|2020-04-01					hCoV-19/Austria/CeMM0342/2020|EPI_ISL_475803|2020-04-03	V47F		hCoV-19/England/NOTT-11189A/2020|EPI_ISL_461935|2020-05-22	1																						Belgium/UGent-107/2020|EPI_ISL_475067|2020-03-18	G24T		USA/UT-06241/2020|EPI_ISL_493122|2020-04-22	1
USA/WA-S454/2020|EPI_ISL_434214|2020-03-31					hCoV-19/Morocco/RA85/2020|EPI_ISL_467299|2020-05-21	V47G		hCoV-19/England/NOTT-11143C/2020|EPI_ISL_453664|2020-05-17	1																						Romania/ROSV_2873/2020|EPI_ISL_491061|2020-04-17	G24T		USA/UT-03827/2020|EPI_ISL_493023|2020-05-09	1
USA/WA-S446/2020|EPI_ISL_434206|2020-04-01					hCoV-19/England/20169000804/2020|EPI_ISL_466625|2020-04-17	V47F		hCoV-19/USA/TX-HMH0291/2020|EPI_ISL_434917|2020-03-27	1																						USA/CA-ALSR-1153/2020|EPI_ISL_494396|2020-04-27	G24T		USA/UT-02707/2020|EPI_ISL_513640|2020-04-28	1
USA/CA-ALSR-0657-IPL/2020|EPI_ISL_483282|2020-04-17					hCoV-19/England/NOTT-11189A/2020|EPI_ISL_461935|2020-05-22	N48S		hCoV-19/USA/MN-MDH-156/2020|EPI_ISL_460056|2020-03-23	1																						USA/WA-UW-631/2020|EPI_ISL_476911|2020-03-12	C26T		USA/UT-02860/2020|EPI_ISL_513666|2020-04-29	1
Scotland/EDB6165/2020|EPI_ISL_473897|2020-05-15					hCoV-19/England/NOTT-11143C/2020|EPI_ISL_453664|2020-05-17	N48S		hCoV-19/Wales/PHWC-35D29/2020|EPI_ISL_474560|2020-04-26	1																						England/NORW-EAB56/2020|EPI_ISL_457356|2020-05-08	C26T		USA/UT-02862/2020|EPI_ISL_513668|2020-04-29	1
Scotland/EDB6151/2020|EPI_ISL_473889|2020-05-14					hCoV-19/USA/TX-HMH0291/2020|EPI_ISL_434917|2020-03-27	V49L		hCoV-19/USA/MN-MDH-149/2020|EPI_ISL_427287|2020-03-23	1																						England/NORW-EAB38/2020|EPI_ISL_457354|2020-05-09	C26T		USA/UT-02855/2020|EPI_ISL_513663|2020-04-29	1
USA/CA-SR0377/2020|EPI_ISL_458259|2020-04-13					hCoV-19/USA/MN-MDH-156/2020|EPI_ISL_460056|2020-03-23	V49L		hCoV-19/England/OXON-AF57D/2020|EPI_ISL_478751|2020-04-14	1																						USA/CA-CZB-1341/2020|EPI_ISL_468360|2020-04-08	C26T		USA/UT-02844/2020|EPI_ISL_513653|2020-04-29	1
USA/CA-SR0368/2020|EPI_ISL_458251|2020-04-15					hCoV-19/Wales/PHWC-35D29/2020|EPI_ISL_474560|2020-04-26	V49L		hCoV-19/England/OXON-AF3EC/2020|EPI_ISL_478733|2020	1																						England/BRIS-12DA59/2020|EPI_ISL_481821|2020-05-07	C26T		USA/UT-02857/2020|EPI_ISL_513665|2020-04-29	1
USA/CA-SR0359/2020|EPI_ISL_458243|2020-04-12					hCoV-19/USA/MN-MDH-149/2020|EPI_ISL_427287|2020-03-23	V49L		hCoV-19/Wales/PHWC-338DF/2020|EPI_ISL_446763|2020-04-21	1																						Scotland/CVR2552/2020|EPI_ISL_484601|2020-04-15	C26T		USA/UT-02451/2020|EPI_ISL_493092|2020-04-22	1
USA/WA-S535/2020|EPI_ISL_434295|2020-03-25					hCoV-19/England/OXON-AF57D/2020|EPI_ISL_478751|2020-04-14	V49L		hCoV-19/Switzerland/200055_614_B07/2020|EPI_ISL_510739|2020-07-13	1																						Northern_Ireland/NIRE-FBB52/2020|EPI_ISL_470018|2020-04-13	C26T		USA/UT-03443/2020|EPI_ISL_509575|2020-04-16	1
USA/WA-S527/2020|EPI_ISL_434287|2020-03-31					hCoV-19/England/OXON-AF3EC/2020|EPI_ISL_478733|2020	V49L		hCoV-19/USA/CA-CSMC120/2020|EPI_ISL_475597|2020-04-05	1																						USA/MI-UM-2006S001011/2020|EPI_ISL_484790|2020-04-07	C26T		Australia/NSW757/2020|EPI_ISL_513399|2020-07-19	1
USA/WA-S508/2020|EPI_ISL_434268|2020-03-30					hCoV-19/Wales/PHWC-338DF/2020|EPI_ISL_446763|2020-04-21	V49L		hCoV-19/England/SHEF-BFEAC/2020|EPI_ISL_418303|2020-03-25	1																						England/CAMB-1B477E/2020|EPI_ISL_473482|2020-06-03	C26T		Canada/BC_21355315/2020|EPI_ISL_477023|2020-04	1
USA/NY-NYUMC156/2020|EPI_ISL_424963|2020-04-01					hCoV-19/Switzerland/200055_614_B07/2020|EPI_ISL_510739|2020-07-13	V49L		hCoV-19/England/LIVE-A6A2C/2020|EPI_ISL_499765|2020-03-15	1																						Scotland/CVR1675/2020|EPI_ISL_433649|2020-04-05	C26T		Canada/BC_19196568/2020|EPI_ISL_469220|2020-04	1
USA/NY-NYUMC148/2020|EPI_ISL_424955|2020-04-01					hCoV-19/Northern_Ireland/NIRE-106ACF/2020|EPI_ISL_501013|2020-05-19	V49L		hCoV-19/USA/WA-S1825/2020|EPI_ISL_496251|2020-06-02	1																						Scotland/CVR2937/2020|EPI_ISL_438999|2020-04-22	C26T		England/SHEF-C4AEC/2020|EPI_ISL_479211|2020-06-02	1
USA/NY-NYUMC139/2020|EPI_ISL_424946|2020-04-01					hCoV-19/USA/CA-CSMC120/2020|EPI_ISL_475597|2020-04-05	S50I		hCoV-19/Australia/VIC308/2020|EPI_ISL_419999|2020-03-23	1																						Switzerland/120164/2020|EPI_ISL_468243|2020-04-25	C26T		USA/FL-BPHL-0327/2020|EPI_ISL_489736|2020-04-17	1
USA/NY-NYUMC131/2020|EPI_ISL_424938|2020-04-01					hCoV-19/England/NORT-291FF6/2020|EPI_ISL_489065|2020-05-07	S50I		hCoV-19/Wales/PHWC-2C666/2020|EPI_ISL_445890|2020-03-31	1																						England/NORW-E8DBC/2020|EPI_ISL_461808|2020-04-27	C26T		Canada/BC_19803546/2020|EPI_ISL_469223|2020-04	1
USA/NY-NYUMC123/2020|EPI_ISL_424930|2020-04-01					hCoV-19/England/SHEF-BFEAC/2020|EPI_ISL_418303|2020-03-25	S50G		hCoV-19/Brazil/CV12/2020|EPI_ISL_429674|2020-03-11	1																						Wales/PHWC-34689/2020|EPI_ISL_446956|2020-04-20	C26T		Wales/PHWC-3175C/2020|EPI_ISL_446481|2020-04-13	1
France/OCC-12/2020|EPI_ISL_434627|2020-03-26					hCoV-19/England/LIVE-A6A2C/2020|EPI_ISL_499765|2020-03-15	S50G		hCoV-19/Wales/PHWC-2F047/2020|EPI_ISL_446191|2020-04-06	1																						England/NORW-EA057/2020|EPI_ISL_448387|2020-05-03	C26T		Canada/BC_21358214/2020|EPI_ISL_477024|2020-04	1
Japan/TKYE6947/2020|EPI_ISL_434562|2020-03					hCoV-19/USA/WA-S1825/2020|EPI_ISL_496251|2020-06-02	L51F		hCoV-19/Scotland/EDB6445/2020|EPI_ISL_491609|2020-04-22	1																						Switzerland/130013/2020|EPI_ISL_467007|2020-05-07	C26T		Egypt/HCoV2-Egy-002/2020|EPI_ISL_510532|2020-06-02	1
Sweden/20-05856/2020|EPI_ISL_434649|2020-03-17					hCoV-19/Israel/CVL-n26112/2020|EPI_ISL_514285|2020-07-20	L51V		hCoV-19/England/LCST-24D7105/2020|EPI_ISL_478364|2020-06-12	1																						England/CAMB-1AECB4/2020|EPI_ISL_448069|2020-05-06	C26T		USA/WI-UW-897/2020|EPI_ISL_509899|2020-07-12	1
Sweden/20-08682/2020|EPI_ISL_434641|2020-03-25					hCoV-19/Australia/VIC308/2020|EPI_ISL_419999|2020-03-23	V52I		hCoV-19/England/LCST-24D6BBD/2020|EPI_ISL_484223|2020-06-08	1																						Denmark/ALAB-HH-240/2020|EPI_ISL_452080|2020-04-16	C26T		Egypt/Army-MCL001/2020|EPI_ISL_510526|2020-06-01	1
France/OCC-5/2020|EPI_ISL_434620|2020-03					hCoV-19/Wales/PHWC-2C666/2020|EPI_ISL_445890|2020-03-31	V52L		hCoV-19/England/LCST-24D709F/2020|EPI_ISL_478360|2020-06-06	1																						England/NORW-EE69D/2020|EPI_ISL_490555|2020-04-24	C26T		Switzerland/190016_541_E4/2020|EPI_ISL_500881|2020-07-06	1
USA/NY-NYUMC404/2020|EPI_ISL_430431|2020-04-13					hCoV-19/Brazil/CV12/2020|EPI_ISL_429674|2020-03-11	V52E		hCoV-19/England/LCST-24D6BAE/2020|EPI_ISL_484222|2020-06-08	1																						Belgium/UGent-40/2020|EPI_ISL_434357|2020-03-27	C26T		Brazil/RJ-DCVN5/2020|EPI_ISL_510536|2020-07-20	1
USA/NY-NYUMC396/2020|EPI_ISL_430423|2020-04-11					hCoV-19/Wales/PHWC-2F047/2020|EPI_ISL_446191|2020-04-06	V52L		hCoV-19/England/LCST-24D6B35/2020|EPI_ISL_478331|2020-06-07	1																						Scotland/CVR3278/2020|EPI_ISL_456775|2020-05-04	C26T		Brazil/RJ-DCVN4/2020|EPI_ISL_510541|2020-07-20	1
USA/NY-NYUMC388/2020|EPI_ISL_430415|2020-04-10					hCoV-19/Scotland/EDB6445/2020|EPI_ISL_491609|2020-04-22	V52L		hCoV-19/DRC/6342/2020|EPI_ISL_495632|2020-05-09	1																						England/NORW-EB9F1/2020|EPI_ISL_457466|2020-05-09	C26T		Canada/ON_VIDO-01/2020|EPI_ISL_413015|2020-01-23	1
Kazakhstan/16173/2020|EPI_ISL_454497|2020-05-14					hCoV-19/England/LCST-24D7105/2020|EPI_ISL_478364|2020-06-12	K53R		hCoV-19/DRC/6341/2020|EPI_ISL_495631|2020-05-09	1																						England/NORW-E9EF4/2020|EPI_ISL_448380|2020-05-02	C26T		Sweden/20-19008/2020|EPI_ISL_469064|2020-05-27	1
Sweden/20-08119/2020|EPI_ISL_454489|2020-03-09					hCoV-19/England/LCST-24D6BBD/2020|EPI_ISL_484223|2020-06-08	K53R		hCoV-19/Sichuan/SC-NC-071/2020|EPI_ISL_451330|2020-01-29	1																						England/NORW-EA646/2020|EPI_ISL_461860|2020-05-21	C26T		France/HF3141/2020|EPI_ISL_420057|2020-03-22	1
Sweden/20-08110/2020|EPI_ISL_454481|2020-03-09					hCoV-19/England/LCST-24D709F/2020|EPI_ISL_478360|2020-06-06	K53R		hCoV-19/Netherlands/Gelderland_86/2020|EPI_ISL_460985|2020-05-19	1																						Scotland/GCVR-173D88/2020|EPI_ISL_459159|2020-04-07	C26T		England/NORW-ED801/2020|EPI_ISL_490498|2020	1
Sweden/20-08102/2020|EPI_ISL_454473|2020-03-07					hCoV-19/England/LCST-24D6BAE/2020|EPI_ISL_484222|2020-06-08	K53R		hCoV-19/Netherlands/Gelderland_78/2020|EPI_ISL_460977|2020-05-19	1																						Scotland/CVR2288/2020|EPI_ISL_477894|2020-04-12	C26T		England/BRIS-12AB68/2020|EPI_ISL_458481|2020-05-01	1
Sweden/20-08093/2020|EPI_ISL_454465|2020-03-06					hCoV-19/England/LCST-24D6B35/2020|EPI_ISL_478331|2020-06-07	K53R		hCoV-19/Netherlands/Flevoland_16/2020|EPI_ISL_460839|2020-05-20	1																						Australia/NSW491/2020|EPI_ISL_455031|2020-04-23	C26T		England/BRIS-12B350/2020|EPI_ISL_487577|2020-05-03	1
Sweden/20-08083/2020|EPI_ISL_454457|2020-03-05					hCoV-19/DRC/6342/2020|EPI_ISL_495632|2020-05-09	K53R		hCoV-19/Netherlands/NA_630/2020|EPI_ISL_461065|2020-03-29	1																						Brazil/SP-512/2020|EPI_ISL_471556|2020-04-18	C26T		Wales/PHWC-2B2EB/2020|EPI_ISL_432315|2020-04-07	1
Sweden/20-08129/2020|EPI_ISL_454444|2020-03-10					hCoV-19/DRC/6341/2020|EPI_ISL_495631|2020-05-09	K53R		hCoV-19/Netherlands/Utrecht_48/2020|EPI_ISL_461244|2020-05-20	1																						England/NORW-EAB47/2020|EPI_ISL_457355|2020-05-10	C26T		India/InStem_NCBS_0005/2020|EPI_ISL_477208|2020-06-01	1
Sweden/20-08040/2020|EPI_ISL_454436|2020-03-07					hCoV-19/Sichuan/SC-NC-071/2020|EPI_ISL_451330|2020-01-29	P54S		hCoV-19/USA/WA-S507/2020|EPI_ISL_434267|2020-03-23	1																						Scotland/CVR2795/2020|EPI_ISL_453076|2020-04-20	C26T		Spain/Logrono_h2361/2020|EPI_ISL_468761|2020-04-04	1
Australia/NT38/2020|EPI_ISL_430496|2020					hCoV-19/Netherlands/Gelderland_86/2020|EPI_ISL_460985|2020-05-19	S55F		hCoV-19/USA/CA-CSMC20/2020|EPI_ISL_475630|2020-03-25	1																						Israel/CVL-n26167/2020|EPI_ISL_514294|2020-07-20	C26T		USA/MN-MDH-585/2020|EPI_ISL_437382|2020-04-14	1
Australia/VIC991/2020|EPI_ISL_430474|2020-03-31					hCoV-19/Netherlands/Gelderland_78/2020|EPI_ISL_460977|2020-05-19	S55F		hCoV-19/Netherlands/Gelderland_85/2020|EPI_ISL_460984|2020-05-19	1																						Israel/CVL-n25922/2020|EPI_ISL_514278|2020-07-20	C26T		Scotland/GCVR-171AB0/2020|EPI_ISL_489392|2020-03-25	1
USA/NY-NYUMC405/2020|EPI_ISL_430432|2020-04-13					hCoV-19/Netherlands/Flevoland_16/2020|EPI_ISL_460839|2020-05-20	S55F		hCoV-19/Netherlands/Gelderland_77/2020|EPI_ISL_460976|2020-05-19	1																						Israel/CVL-n26389/2020|EPI_ISL_514297|2020-07-21	C26T		Thailand/UDC302026-4/2020|EPI_ISL_451028|2020-04-12	1
USA/NY-NYUMC375/2020|EPI_ISL_430402|2020-04-10					hCoV-19/Netherlands/NA_630/2020|EPI_ISL_461065|2020-03-29	S55F		hCoV-19/USA/WA-UW-1677/2020|EPI_ISL_424214|2020-03-20	1																						Israel/CVL-n25955/2020|EPI_ISL_514282|2020-07-20	C26T		England/OXON-B06FE/2020|EPI_ISL_478903|2020-04-20	1
Sweden/20-08072/2020|EPI_ISL_454449|2020-03-03					hCoV-19/Netherlands/Utrecht_48/2020|EPI_ISL_461244|2020-05-20	S55F		hCoV-19/Portugal/PT0387/2020|EPI_ISL_454103|2020-03-20	1																						Israel/CVL-n25867/2020|EPI_ISL_514270|2020-07-20	C26T		Wales/PHWC-15D1D3/2020|EPI_ISL_472681|2020-04-08	1
Wales/PHWC-254AF/2020|EPI_ISL_420998|2020-03-23					hCoV-19/USA/WA-S507/2020|EPI_ISL_434267|2020-03-23	S55F		hCoV-19/Netherlands/Gelderland_93/2020|EPI_ISL_460992|2020-05-23	1																						Israel/CVL-n26131/2020|EPI_ISL_514288|2020-07-20	C26T		USA/MN-MDH-621/2020|EPI_ISL_437383|2020-04-15	1
Germany/BAV-V2012612/2020|EPI_ISL_420908|2020-03-19					hCoV-19/USA/CA-CSMC20/2020|EPI_ISL_475630|2020-03-25	S55F		hCoV-19/Netherlands/Gelderland_84/2020|EPI_ISL_460983|2020-05-19	1																						Israel/CVL-n26412/2020|EPI_ISL_514299|2020-07-21	C26T		Wales/PHWC-3281C/2020|EPI_ISL_474354|2020-04-15	1
Germany/BAV-V2010837/2020|EPI_ISL_420900|2020-03-12					hCoV-19/Netherlands/Gelderland_85/2020|EPI_ISL_460984|2020-05-19	S55F		hCoV-19/England/NOTT-10FC0C/2020|EPI_ISL_432699|2020-04-07	1																						Israel/CVL-n25783/2020|EPI_ISL_514267|2020-07-19	C26T		England/BRIS-12EF86/2020|EPI_ISL_488248|2020-04-22	1
Spain/Donostia-San_Sebastian2128/2020|EPI_ISL_468926|2020-04-12					hCoV-19/Netherlands/Gelderland_77/2020|EPI_ISL_460976|2020-05-19	S55F		hCoV-19/Australia/SAP327/2020|EPI_ISL_483105|2020-03-27	1																						England/NORT-28356E/2020|EPI_ISL_478496|2020-03-31	G28T		England/NORW-EE3F0/2020|EPI_ISL_490538|2020	1
Spain/Donostia-San_Sebastian2136/2020|EPI_ISL_468909|2020-04-12					hCoV-19/USA/WA-UW-1677/2020|EPI_ISL_424214|2020-03-20	S55F		hCoV-19/England/OXON-B07BF/2020|EPI_ISL_478907|2020-04-20	1																						Scotland/CVR2552/2020|EPI_ISL_484601|2020-04-15	G28T		England/CAMB-72713/2020|EPI_ISL_439658|2020-03-24	1
USA/NY-NYUMC305/2020|EPI_ISL_430332|2020-03-30					hCoV-19/Portugal/PT0387/2020|EPI_ISL_454103|2020-03-20	S55F		hCoV-19/Netherlands/Gelderland_92/2020|EPI_ISL_460991|2020-05-23	1																						Scotland/CVR2937/2020|EPI_ISL_438999|2020-04-22	G28T		England/BRIS-12D01B/2020|EPI_ISL_481929|2020-04-25	1
USA/NY-NYUMC297/2020|EPI_ISL_430324|2020-04-10					hCoV-19/Netherlands/Gelderland_93/2020|EPI_ISL_460992|2020-05-23	S55F		hCoV-19/Netherlands/Gelderland_83/2020|EPI_ISL_460982|2020-05-19	1																						England/CAMB-7D2EA/2020|EPI_ISL_441590|2020-04-06	G29T		England/BRIS-12CE7C/2020|EPI_ISL_481793|2020-04-24	1
Wales/PHWC-251B7/2020|EPI_ISL_420976|2020-03-22					hCoV-19/Netherlands/Gelderland_84/2020|EPI_ISL_460983|2020-05-19	S55F		hCoV-19/Netherlands/Gelderland_91/2020|EPI_ISL_460990|2020-05-22	1																						Netherlands/NoordBrabant_34/2020|EPI_ISL_414543|2020-03	T30C		India/IB14/2020|EPI_ISL_508292|2020-06-18	1
Australia/VIC260/2020|EPI_ISL_419953|2020-03-21					hCoV-19/England/NOTT-10FC0C/2020|EPI_ISL_432699|2020-04-07	S55F		hCoV-19/Netherlands/Gelderland_82/2020|EPI_ISL_460981|2020-05-19	1																						Netherlands/Zeeland_8/2020|EPI_ISL_461290|2020-03-06	A31G		Israel/CVL-n-7920/2020|EPI_ISL_475007|2020-04-13	1
Spain/Lluchmayor2538/2020|EPI_ISL_468992|2020-03-27					hCoV-19/Australia/SAP327/2020|EPI_ISL_483105|2020-03-27	S55F		hCoV-19/Netherlands/NA_183/2020|EPI_ISL_422718|2020-03-23	1																						Sweden/20-52052/2020|EPI_ISL_510870|2020-06-04	G33T		USA/WA-S165/2020|EPI_ISL_430203|2020-03-18	1
Spain/Palma2587/2020|EPI_ISL_468984|2020-04-15					hCoV-19/England/OXON-B07BF/2020|EPI_ISL_478907|2020-04-20	S55F		hCoV-19/Netherlands/Gelderland_90/2020|EPI_ISL_460989|2020-05-22	1																						Sweden/20-51746/2020|EPI_ISL_510843|2020-05-22	G33T		Sweden/20-51167/2020|EPI_ISL_450832|2020-05-04	1
Spain/Palma2524/2020|EPI_ISL_468959|2020-03-20					hCoV-19/Netherlands/Gelderland_92/2020|EPI_ISL_460991|2020-05-23	S55F		hCoV-19/Netherlands/Gelderland_81/2020|EPI_ISL_460980|2020-05-19	1																						England/LOND-D68A1/2020|EPI_ISL_482216|2020-04-24	A36T		Austria/Graz-MUG7/2020|EPI_ISL_437203|2020-04-06	1
Spain/Donostia-San_Sebastian2167/2020|EPI_ISL_468951|2020-04-12					hCoV-19/Netherlands/Gelderland_83/2020|EPI_ISL_460982|2020-05-19	S55F		hCoV-19/England/NORT-2896DE/2020|EPI_ISL_458689|2020-03-31	1																						USA/MI-MDHHS-SC20882/2020|EPI_ISL_471903|2020-05-16	A36G		USA/CA-SR016/2020|EPI_ISL_430016|2020-03-24	1
Spain/Donostia-San_Sebastian2083/2020|EPI_ISL_468943|2020-04-10					hCoV-19/Netherlands/Gelderland_91/2020|EPI_ISL_460990|2020-05-22	S55F		hCoV-19/Netherlands/Gelderland_88/2020|EPI_ISL_460987|2020-05-20	1																						USA/WI-UW-759/2020|EPI_ISL_495464|2020-07-06	A36G		USA/NM-UNM-00142/2020|EPI_ISL_467653|2020-04-03	1
Spain/Donostia-San_Sebastian2078/2020|EPI_ISL_468935|2020-04-10					hCoV-19/Netherlands/Gelderland_82/2020|EPI_ISL_460981|2020-05-19	S55F		hCoV-19/Netherlands/Gelderland_80/2020|EPI_ISL_460979|2020-05-19	1																						Scotland/EDB348/2020|EPI_ISL_425977|2020-03-29	A37G		England/CAMB-1B147A/2020|EPI_ISL_458525|2020-05-07	1
USA/NY-NYUMC370/2020|EPI_ISL_430397|2020-04-09					hCoV-19/Netherlands/NA_640/2020|EPI_ISL_461075|2020-05-03	S55F		hCoV-19/Netherlands/Flevoland_18/2020|EPI_ISL_460841|2020-05-22	1																						DRC/4012/2020|EPI_ISL_471402|2020-04-26	T42C		Bangladesh/BCSIR-NILMRC_133/2020|EPI_ISL_480419|2020-06-18	1
USA/NY-NYUMC361/2020|EPI_ISL_430388|2020-04-09					hCoV-19/England/LIVE-A065B/2020|EPI_ISL_472124|2020-05-27	S55F		hCoV-19/Netherlands/Utrecht_50/2020|EPI_ISL_461246|2020-05-22	1																						Brazil/RJ-2669/2020|EPI_ISL_467353|2020-04-24	T42C		Belgium/UGent-107/2020|EPI_ISL_475067|2020-03-18	1
USA/NY-NYUMC352/2020|EPI_ISL_430379|2020-04-07					hCoV-19/Netherlands/NA_183/2020|EPI_ISL_422718|2020-03-23	S55F		hCoV-19/Netherlands/Gelderland_89/2020|EPI_ISL_460988|2020-05-22	1																						Israel/CVL-n26112/2020|EPI_ISL_514285|2020-07-20	A46G		Romania/ROSV_2873/2020|EPI_ISL_491061|2020-04-17	1
USA/NJ-NYUMC344/2020|EPI_ISL_430371|2020-04-08					hCoV-19/Netherlands/Gelderland_90/2020|EPI_ISL_460989|2020-05-22	S55F		hCoV-19/Netherlands/Gelderland_87/2020|EPI_ISL_460986|2020-05-20	1																						Spain/COV001396/2020|EPI_ISL_452505|2020-03-18	G47A		USA/CA-ALSR-1153/2020|EPI_ISL_494396|2020-04-27	1
USA/NY-NYUMC322/2020|EPI_ISL_430349|2020-03-30					hCoV-19/Netherlands/Gelderland_81/2020|EPI_ISL_460980|2020-05-19	S55F		hCoV-19/Netherlands/Gelderland_79/2020|EPI_ISL_460978|2020-05-19	1																						England/LIVE-9E711/2020|EPI_ISL_453325|2020-04-10	G47A		USA/WA-UW-631/2020|EPI_ISL_476911|2020-03-12	1
USA/NY-NYUMC314/2020|EPI_ISL_430341|2020-03-30					hCoV-19/England/NORT-2896DE/2020|EPI_ISL_458689|2020-03-31	S55F		hCoV-19/Netherlands/Flevoland_17/2020|EPI_ISL_460840|2020-05-22	1																						England/BRIS-12946E/2020|EPI_ISL_458767|2020-04-19	G47A		England/NORW-EAB56/2020|EPI_ISL_457356|2020-05-08	1
Spain/Palma2542/2020|EPI_ISL_468975|2020-03-19					hCoV-19/Netherlands/Gelderland_88/2020|EPI_ISL_460987|2020-05-20	S55F		hCoV-19/Netherlands/Utrecht_49/2020|EPI_ISL_461245|2020-05-20	1																						England/BRIS-12949B/2020|EPI_ISL_458834|2020-04-20	G47A		England/NORW-EAB38/2020|EPI_ISL_457354|2020-05-09	1
Spain/Palma2591/2020|EPI_ISL_468966|2020-04-15					hCoV-19/Netherlands/Gelderland_80/2020|EPI_ISL_460979|2020-05-19	S55F		hCoV-19/Portugal/PT0376/2020|EPI_ISL_454092|2020-03-20	1																						England/BRIS-12DF78/2020|EPI_ISL_482018|2020-04-20	G47A		USA/CA-CZB-1341/2020|EPI_ISL_468360|2020-04-08	1
USA/CA-CZB-1277/2020|EPI_ISL_454635|2020-03-15					hCoV-19/Netherlands/Flevoland_18/2020|EPI_ISL_460841|2020-05-22	S55F		hCoV-19/Norway/2829/2020|EPI_ISL_493382|2020-06-29	1																						Australia/VIC1733/2020|EPI_ISL_456631|2020-05-05	C48T		England/BRIS-12DA59/2020|EPI_ISL_481821|2020-05-07	1
Scotland/CVR3019/2020|EPI_ISL_439009|2020-04-24					hCoV-19/Netherlands/Utrecht_50/2020|EPI_ISL_461246|2020-05-22	S55F		hCoV-19/England/LIVE-A120B/2020|EPI_ISL_499984|2020-05-17	1																						Australia/VIC1490/2020|EPI_ISL_456457|2020-04-27	C48T		Northern_Ireland/NIRE-FBB52/2020|EPI_ISL_470018|2020-04-13	1
Australia/VIC1325/2020|EPI_ISL_430688|2020-04-12					hCoV-19/Netherlands/Gelderland_89/2020|EPI_ISL_460988|2020-05-22	S55F		hCoV-19/Portugal/PT1006/2020|EPI_ISL_511553|2020-03-27	1																						New_Zealand/20VR3064/2020|EPI_ISL_456403|2020-04-28	C48T		USA/MI-UM-2006S001011/2020|EPI_ISL_484790|2020-04-07	1
Australia/VIC1067/2020|EPI_ISL_430670|2020-04-04					hCoV-19/England/CAMB-7D2EA/2020|EPI_ISL_441590|2020-04-06	S55F		hCoV-19/England/SHEF-D30BB/2020|EPI_ISL_442518|2020-03-24	1																						Wales/PHWC-35E08/2020|EPI_ISL_474574|2020-04-27	C48T		England/CAMB-1B477E/2020|EPI_ISL_473482|2020-06-03	1
Australia/VIC971/2020|EPI_ISL_430661|2020-03-27					hCoV-19/Netherlands/Gelderland_87/2020|EPI_ISL_460986|2020-05-20	S55F		hCoV-19/Spain/Malaga-COV002856/2020|EPI_ISL_474925|2020-03-12	1																						England/LIVE-9A38A/2020|EPI_ISL_440858|2020-04-17	G49T		Scotland/CVR1675/2020|EPI_ISL_433649|2020-04-05	1
Australia/VIC966/2020|EPI_ISL_430653|2020-03-27					hCoV-19/Netherlands/Gelderland_79/2020|EPI_ISL_460978|2020-05-19	S55F		hCoV-19/Argentina/PAIS-A0023/2020|EPI_ISL_430814|2020-04-17	1																						Iceland/582/2020|EPI_ISL_424602|2020-03-27	T50C		Switzerland/120164/2020|EPI_ISL_468243|2020-04-25	1
USA/NY-NYUMC336/2020|EPI_ISL_430363|2020-04-08					hCoV-19/Netherlands/Flevoland_17/2020|EPI_ISL_460840|2020-05-22	S55F		hCoV-19/Argentina/PAIS-A0024/2020|EPI_ISL_430815|2020-04-18	1																						Scotland/CVR3328/2020|EPI_ISL_493879|2020-05-01	A51T		England/NORW-E8DBC/2020|EPI_ISL_461808|2020-04-27	1
USA/NY-NYUMC328/2020|EPI_ISL_430355|2020-04-02					hCoV-19/Netherlands/Utrecht_49/2020|EPI_ISL_461245|2020-05-20	S55F		hCoV-19/England/BRIS-128414/2020|EPI_ISL_469694|2020-04-16	1																						England/20148065004/2020|EPI_ISL_423593|2020-04-02	C52T		Wales/PHWC-34689/2020|EPI_ISL_446956|2020-04-20	1
Canada/ON-UHTC_0080/2020|EPI_ISL_464040|2020-04-10					hCoV-19/Portugal/PT0376/2020|EPI_ISL_454092|2020-03-20	S55F		hCoV-19/England/BRIS-123992/2020|EPI_ISL_442661|2020-04-07	1																						Spain/COV000698/2020|EPI_ISL_452766|2020-03-05	C52T		England/NORW-EA057/2020|EPI_ISL_448387|2020-05-03	1
Canada/ON-UHTC_0031/2020|EPI_ISL_464032|2020-04-01					hCoV-19/Norway/2829/2020|EPI_ISL_493382|2020-06-29	S55F		hCoV-19/England/BRIS-129EBB/2020|EPI_ISL_458317|2020-04-16	1																						Spain/COV000852/2020|EPI_ISL_452699|2020-03-11	C52T		Switzerland/130013/2020|EPI_ISL_467007|2020-05-07	1
Canada/ON-UHTC_0058/2020|EPI_ISL_464024|2020-04-03					hCoV-19/England/LIVE-A120B/2020|EPI_ISL_499984|2020-05-17	S55F		hCoV-19/England/BRIS-121E3B/2020|EPI_ISL_440029|2020-03-31	1																						Scotland/CVR3890/2020|EPI_ISL_484675|2020-06-15	T54C		England/CAMB-1AECB4/2020|EPI_ISL_448069|2020-05-06	1
Canada/ON-UHTC_0033/2020|EPI_ISL_464016|2020-04-01					hCoV-19/Portugal/PT1006/2020|EPI_ISL_511553|2020-03-27	S55F		hCoV-19/England/20109093606/2020|EPI_ISL_417285|2020-03-06	1																						Wales/PHWC-339BE/2020|EPI_ISL_446774|2020-04-20	C55T		Denmark/ALAB-HH-240/2020|EPI_ISL_452080|2020-04-16	1
Australia/VIC1300/2020|EPI_ISL_430677|2020-04-10					hCoV-19/England/SHEF-D30BB/2020|EPI_ISL_442518|2020-03-24	F56L		hCoV-19/Argentina/Heritas_HG007/2020|EPI_ISL_476565|2020-05-09	1																						Saudi_Arabia/42952/2020|EPI_ISL_469242|2020-03-15	C55T		England/NORW-EE69D/2020|EPI_ISL_490555|2020-04-24	1
Australia/VIC948/2020|EPI_ISL_430647|2020-03-26					hCoV-19/Spain/Malaga-COV002856/2020|EPI_ISL_474925|2020-03-12	V58F		hCoV-19/Argentina/Heritas_HG001/2020|EPI_ISL_476496|2020-04-22	1																						Sierra_Leone/KGH-G-8669/2020|EPI_ISL_512820|2020-04-14	C55T		Belgium/UGent-40/2020|EPI_ISL_434357|2020-03-27	1
Australia/VIC1355/2020|EPI_ISL_430638|2020-04-09					hCoV-19/Argentina/PAIS-A0023/2020|EPI_ISL_430814|2020-04-17	V58F		hCoV-19/England/BRIS-125CD3/2020|EPI_ISL_443791|2020-03-31	1																						Portugal/PT1292/2020|EPI_ISL_511253|2020-03-24	C55T		Scotland/CVR3278/2020|EPI_ISL_456775|2020-05-04	1
Australia/VIC1183/2020|EPI_ISL_430628|2020-04-11					hCoV-19/Argentina/PAIS-A0024/2020|EPI_ISL_430815|2020-04-18	V58F		hCoV-19/England/BRIS-129422/2020|EPI_ISL_458722|2020-04-20	1																						Wales/PHWC-339BE/2020|EPI_ISL_446774|2020-04-20	T56C		England/NORW-EB9F1/2020|EPI_ISL_457466|2020-05-09	1
Australia/VIC1145/2020|EPI_ISL_430620|2020-04-08					hCoV-19/England/BRIS-128414/2020|EPI_ISL_469694|2020-04-16	V58F		hCoV-19/England/BRIS-122CB8/2020|EPI_ISL_440669|2020-04-01	1																						Canada/BC_09025513/2020|EPI_ISL_477109|2020-04	T57A		England/NORW-E9EF4/2020|EPI_ISL_448380|2020-05-02	1
Australia/VIC1140/2020|EPI_ISL_430611|2020-04-08					hCoV-19/England/BRIS-123992/2020|EPI_ISL_442661|2020-04-07	V58F		hCoV-19/England/OXON-ACA53/2020|EPI_ISL_448504|2020-04-05	1																						Wales/PHWC-26435/2020|EPI_ISL_422334|2020-03-27	T57G		England/NORW-EA646/2020|EPI_ISL_461860|2020-05-21	1
Canada/ON-UHTC_0010/2020|EPI_ISL_464052|2020-03-26					hCoV-19/England/BRIS-129EBB/2020|EPI_ISL_458317|2020-04-16	V58F		hCoV-19/England/BRIS-1266F2/2020|EPI_ISL_459074|2020-04-09	1																						Spain/COV001065/2020|EPI_ISL_452611|2020-04-01	T57G		Scotland/GCVR-173D88/2020|EPI_ISL_459159|2020-04-07	1
Canada/ON-UHTC_0091/2020|EPI_ISL_464011|2020-04-11					hCoV-19/England/BRIS-121E3B/2020|EPI_ISL_440029|2020-03-31	V58F		hCoV-19/England/BRIS-12E0A1/2020|EPI_ISL_482021|2020-04-20	1																						England/20130034004/2020|EPI_ISL_423604|2020-03-21	T57C		Scotland/CVR2288/2020|EPI_ISL_477894|2020-04-12	1
Canada/ON-UHTC_0008/2020|EPI_ISL_464002|2020-03-27					hCoV-19/England/20109093606/2020|EPI_ISL_417285|2020-03-06	V58L		hCoV-19/England/OXON-B102C/2020|EPI_ISL_478988|2020	1																						Canada/BC_20367856/2020|EPI_ISL_477022|2020-04	T57A		Australia/NSW491/2020|EPI_ISL_455031|2020-04-23	1
USA/CA-CZB-1259/2020|EPI_ISL_454679|2020-04-12					hCoV-19/Argentina/Heritas_HG007/2020|EPI_ISL_476565|2020-05-09	V58F		hCoV-19/England/BRIS-12E0DE/2020|EPI_ISL_481765|2020-04-20	1																						Canada/BC_10601268/2020|EPI_ISL_477116|2020-04	T57A		Brazil/SP-512/2020|EPI_ISL_471556|2020-04-18	1
USA/CA-CZB-1241/2020|EPI_ISL_454661|2020-04-14					hCoV-19/Argentina/Heritas_HG001/2020|EPI_ISL_476496|2020-04-22	V58F		hCoV-19/Argentina/Heritas_HG006/2020|EPI_ISL_476561|2020-05-07	1																						Canada/BC_09023420/2020|EPI_ISL_477108|2020-04	T57A		England/NORW-EAB47/2020|EPI_ISL_457355|2020-05-10	1
Kazakhstan/22001/2020|EPI_ISL_454582|2020-04-23					hCoV-19/England/BRIS-125CD3/2020|EPI_ISL_443791|2020-03-31	V58F		hCoV-19/England/CAMB-79AB9/2020|EPI_ISL_433819|2020-03-27	1																						Canada/BC_07917795/2020|EPI_ISL_477100|2020-04	T57A		Scotland/CVR2795/2020|EPI_ISL_453076|2020-04-20	1
India/NIV-3472/2020|EPI_ISL_454528|2020-03-17					hCoV-19/England/BRIS-129422/2020|EPI_ISL_458722|2020-04-20	V58F		hCoV-19/England/20136088602/2020|EPI_ISL_420640|2020-03-23	1																						Spain/COV001091/2020|EPI_ISL_452595|2020-03-27	T57G		Israel/CVL-n26167/2020|EPI_ISL_514294|2020-07-20	1
Kazakhstan/38533/2020|EPI_ISL_454520|2020-04-26					hCoV-19/England/BRIS-122CB8/2020|EPI_ISL_440669|2020-04-01	V58L		hCoV-19/Argentina/PAIS-A0026/2020|EPI_ISL_430817|2020-04-18	1																						Spain/Palma2543/2020|EPI_ISL_468990|2020-03-17	T57G		Israel/CVL-n25922/2020|EPI_ISL_514278|2020-07-20	1
Kazakhstan/21399/2020|EPI_ISL_454502|2020-04-20					hCoV-19/England/OXON-ACA53/2020|EPI_ISL_448504|2020-04-05	V58L		hCoV-19/USA/CA-ALSR-1223/2020|EPI_ISL_494447|2020-04-10	1																						Canada/BC_10600634/2020|EPI_ISL_477115|2020-04	T57A		Israel/CVL-n26389/2020|EPI_ISL_514297|2020-07-21	1
Australia/VIC1119/2020|EPI_ISL_430567|2020-04-08					hCoV-19/England/BRIS-1266F2/2020|EPI_ISL_459074|2020-04-09	V58F		hCoV-19/England/BRIS-1310BA/2020|EPI_ISL_501564|2020-03-14	1																						Canada/BC_09021025/2020|EPI_ISL_477107|2020-04	T57A		Israel/CVL-n25955/2020|EPI_ISL_514282|2020-07-20	1
Australia/VIC986/2020|EPI_ISL_430557|2020-03-30					hCoV-19/England/BRIS-12E0A1/2020|EPI_ISL_482021|2020-04-20	V58F		hCoV-19/Panama/335156/2020|EPI_ISL_496807|2020-04-01	1																						Spain/COV000904/2020|EPI_ISL_452663|2020-03-26	T57G		Israel/CVL-n25867/2020|EPI_ISL_514270|2020-07-20	1
Australia/VIC1061/2020|EPI_ISL_430549|2020-04-04					hCoV-19/England/OXON-B102C/2020|EPI_ISL_478988|2020	V58F		hCoV-19/Latvia/107/2020|EPI_ISL_515194|2020-08-05	1																						England/20139015804/2020|EPI_ISL_423343|2020-03-27	T57C		Israel/CVL-n26131/2020|EPI_ISL_514288|2020-07-20	1
Australia/VIC1044/2020|EPI_ISL_430540|2020-04-03					hCoV-19/England/BRIS-12E0DE/2020|EPI_ISL_481765|2020-04-20	V58F		hCoV-19/USA/MI-MDHHS-SC21051/2020|EPI_ISL_507827|2020-03-27	1																						Portugal/PT0500/2020|EPI_ISL_454224|2020-03-14	T57G		Israel/CVL-n26412/2020|EPI_ISL_514299|2020-07-21	1
Australia/VIC1025/2020|EPI_ISL_430532|2020-04-02					hCoV-19/Argentina/Heritas_HG006/2020|EPI_ISL_476561|2020-05-07	V58F		hCoV-19/Australia/NSW354/2020|EPI_ISL_451615|2020-04-17	1																						Spain/Zaragoza2440/2020|EPI_ISL_468828|2020-03-28	T57G		Israel/CVL-n25783/2020|EPI_ISL_514267|2020-07-19	1
Australia/VIC1236/2020|EPI_ISL_430524|2020-04-02					hCoV-19/England/CAMB-79AB9/2020|EPI_ISL_433819|2020-03-27	V58L		hCoV-19/England/BRIS-1225F9/2020|EPI_ISL_440790|2020-04-04	1																						Spain/Ogijares-COV003033/2020|EPI_ISL_474935|2020-04-06	T57G		England/NORT-28356E/2020|EPI_ISL_478496|2020-03-31	1
Australia/VIC1219/2020|EPI_ISL_430516|2020-04-01					hCoV-19/England/20136088602/2020|EPI_ISL_420640|2020-03-23	V58L		hCoV-19/Wales/PHWC-24FEB/2020|EPI_ISL_420928|2020-03-20	1																						Canada/BC_10600259/2020|EPI_ISL_477114|2020-04	T57A		Netherlands/NoordBrabant_34/2020|EPI_ISL_414543|2020-03	1
Australia/VIC1198/2020|EPI_ISL_430507|2020-03-31					hCoV-19/Argentina/PAIS-A0026/2020|EPI_ISL_430817|2020-04-18	V58F		hCoV-19/England/BRIS-124A34/2020|EPI_ISL_443776|2020-03-25	1																						Spain/COV001424/2020|EPI_ISL_452477|2020-03-22	T57G		Netherlands/Zeeland_8/2020|EPI_ISL_461290|2020-03-06	1
USA/NY-QDX-96/2020|EPI_ISL_468588|2020-03-13					hCoV-19/USA/CA-ALSR-1223/2020|EPI_ISL_494447|2020-04-10	V58F		hCoV-19/Japan/PG-0457/2020|EPI_ISL_480118|2020-03-27	1																						Portugal/PT0499/2020|EPI_ISL_454223|2020-03-13	T57G		England/LOND-D68A1/2020|EPI_ISL_482216|2020-04-24	1
USA/NY-QDX-102/2020|EPI_ISL_468577|2020-03-12					hCoV-19/England/BRIS-1310BA/2020|EPI_ISL_501564|2020-03-14	V58L		hCoV-19/Philippines/RITM-03/2020|EPI_ISL_430456|2020-03-21	1																						Spain/Granada-COV003022/2020|EPI_ISL_474894|2020-04-04	T57G		USA/MI-MDHHS-SC20882/2020|EPI_ISL_471903|2020-05-16	1
USA/CA-QDX-86/2020|EPI_ISL_468566|2020-03-13					hCoV-19/Panama/335156/2020|EPI_ISL_496807|2020-04-01	V58A		hCoV-19/England/NOTT-111BFB/2020|EPI_ISL_472384|2020-05-29	1																						Canada/BC_09040534/2020|EPI_ISL_477113|2020-04	T57A		USA/WI-UW-759/2020|EPI_ISL_495464|2020-07-06	1
Kazakhstan/26562/2020|EPI_ISL_454599|2020-04-26					hCoV-19/Latvia/107/2020|EPI_ISL_515194|2020-08-05	V58F		hCoV-19/Australia/VIC446/2020|EPI_ISL_426742|2020-03-27	1																						Canada/BC_09009433/2020|EPI_ISL_477105|2020-04	T57A		Scotland/EDB348/2020|EPI_ISL_425977|2020-03-29	1
USA/IL-NM0109/2020|EPI_ISL_444594|2020-03-20					hCoV-19/USA/MI-MDHHS-SC21051/2020|EPI_ISL_507827|2020-03-27	V58F		hCoV-19/Japan/PG-0366/2020|EPI_ISL_480036|2020-03-24	1																						England/20139015604/2020|EPI_ISL_423341|2020-03-27	T57C		DRC/4012/2020|EPI_ISL_471402|2020-04-26	1
USA/IL-NM096/2020|EPI_ISL_444584|2020-03-18					hCoV-19/Netherlands/NA_640/2020|EPI_ISL_461075|2020-05-03	Y59H		hCoV-19/Wales/PHWC-2532A/2020|EPI_ISL_432231|2020-03-22	1																						Japan/TKY3583/2020|EPI_ISL_462446|2020-03	T57G		Brazil/RJ-2669/2020|EPI_ISL_467353|2020-04-24	1
Australia/VIC1157/2020|EPI_ISL_430598|2020-04-09					hCoV-19/Australia/NSW354/2020|EPI_ISL_451615|2020-04-17	Y59H		hCoV-19/England/BRIS-125426/2020|EPI_ISL_443981|2020-03-27	1																						Spain/COV000936/2020|EPI_ISL_452636|2020-03-28	T57G		Spain/COV001396/2020|EPI_ISL_452505|2020-03-18	1
Australia/VIC1106/2020|EPI_ISL_430588|2020-04-07					hCoV-19/England/BRIS-1225F9/2020|EPI_ISL_440790|2020-04-04	R61H		hCoV-19/Netherlands/NA_94/2020|EPI_ISL_422854|2020-03-18	1																						Canada/BC_10616731/2020|EPI_ISL_477119|2020-04	T57A		England/LIVE-9E711/2020|EPI_ISL_453325|2020-04-10	1
Australia/VIC1081/2020|EPI_ISL_430580|2020-04-06					hCoV-19/Wales/PHWC-24FEB/2020|EPI_ISL_420928|2020-03-20	R61H		hCoV-19/India/GBRC198/2020|EPI_ISL_469043|2020-06-08	1																						Canada/BC_09029034/2020|EPI_ISL_477111|2020-04	T57A		England/BRIS-12946E/2020|EPI_ISL_458767|2020-04-19	1
England/20136096104/2020|EPI_ISL_420647|2020-03-25					hCoV-19/England/BRIS-124A34/2020|EPI_ISL_443776|2020-03-25	R61H		hCoV-19/Lebanon/S6_766/2020|EPI_ISL_450513|2020-03-09	1																						England/20134000804/2020|EPI_ISL_423045|2020-03-24	T57C		England/BRIS-12949B/2020|EPI_ISL_458834|2020-04-20	1
England/20136088302/2020|EPI_ISL_420639|2020-03-26					hCoV-19/Japan/PG-0457/2020|EPI_ISL_480118|2020-03-27	R61C		hCoV-19/USA/WA-UW-5011/2020|EPI_ISL_461433|2020-04-07	1																						Hungary/UD-10168/2020|EPI_ISL_477008|2020-04-21	T57G		England/BRIS-12DF78/2020|EPI_ISL_482018|2020-04-20	1
USA/WI-GMF-00466/2020|EPI_ISL_419651|2020-03-29					hCoV-19/Philippines/RITM-03/2020|EPI_ISL_430456|2020-03-21	R61C		hCoV-19/Sierra_Leone/KGH-G-8625/2020|EPI_ISL_512816|2020-04-10	1																						England/20132081804/2020|EPI_ISL_423812|2020-03-23	T57C		Australia/VIC1733/2020|EPI_ISL_456631|2020-05-05	1
USA/NY-NYUMC574/2020|EPI_ISL_444691|2020-03-30					hCoV-19/England/NOTT-111BFB/2020|EPI_ISL_472384|2020-05-29	R61H		hCoV-19/Sierra_Leone/KGH-G-8790/2020|EPI_ISL_512821|2020-04-27	1																						Canada/BC_09026743/2020|EPI_ISL_477110|2020-04	T57A		Australia/VIC1490/2020|EPI_ISL_456457|2020-04-27	1
USA/NY-NYUMC566/2020|EPI_ISL_444683|2020-03-30					hCoV-19/Australia/VIC446/2020|EPI_ISL_426742|2020-03-27	R61L		hCoV-19/Sierra_Leone/KGH-G-8668/2020|EPI_ISL_512819|2020-04-11	1																						Spain/Madrid_H12_2208/2020|EPI_ISL_421178|2020-03-27	T57G		New_Zealand/20VR3064/2020|EPI_ISL_456403|2020-04-28	1
USA/NY-NYUMC558/2020|EPI_ISL_444675|2020-03-30					hCoV-19/Japan/PG-0366/2020|EPI_ISL_480036|2020-03-24	R61C		hCoV-19/USA/WA-S2336/2020|EPI_ISL_496968|2020-06-11	1																						Spain/AN-004022/2020|EPI_ISL_500161|2020-04-27	T57G		Wales/PHWC-35E08/2020|EPI_ISL_474574|2020-04-27	1
USA/NY-NYUMC550/2020|EPI_ISL_444667|2020-03-30					hCoV-19/Wales/PHWC-2532A/2020|EPI_ISL_432231|2020-03-22	R61H		hCoV-19/USA/WA-S2020/2020|EPI_ISL_497448|2020-06-05	1																						Spain/AN-003996/2020|EPI_ISL_500193|2020-04-20	T57G		England/LIVE-9A38A/2020|EPI_ISL_440858|2020-04-17	1
USA/NY-NYUMC542/2020|EPI_ISL_444659|2020-03-30					hCoV-19/England/BRIS-125426/2020|EPI_ISL_443981|2020-03-27	R61H		hCoV-19/USA/WA-S1811/2020|EPI_ISL_496237|2020-06-02	1																						Portugal/PT1265/2020|EPI_ISL_511226|2020-03-19	T57G		Iceland/582/2020|EPI_ISL_424602|2020-03-27	1
USA/NY-NYUMC509/2020|EPI_ISL_444626|2020-03-30					hCoV-19/Netherlands/NA_94/2020|EPI_ISL_422854|2020-03-18	V62F		hCoV-19/USA/MD-MDH-0085/2020|EPI_ISL_509489|2020-05-26	1																						Spain/PV-004210/2020|EPI_ISL_510495|2020-04-03	T57G		Scotland/CVR3328/2020|EPI_ISL_493879|2020-05-01	1
USA/IL-NM0119/2020|EPI_ISL_444602|2020-03-21					hCoV-19/India/GBRC198/2020|EPI_ISL_469043|2020-06-08	V62F		hCoV-19/USA/WA-S1809/2020|EPI_ISL_496235|2020-06-02	1																						Spain/MD-006421/2020|EPI_ISL_510136|2020-05-14	T57G		England/20148065004/2020|EPI_ISL_423593|2020-04-02	1
England/20136096904/2020|EPI_ISL_420651|2020-03-23					hCoV-19/Lebanon/S6_766/2020|EPI_ISL_450513|2020-03-09	V62D		hCoV-19/USA/WA-S1602/2020|EPI_ISL_496028|2020-05-26	1																						Spain/AN-003987/2020|EPI_ISL_500220|2020-04-16	T57G		Spain/COV000698/2020|EPI_ISL_452766|2020-03-05	1
USA/CA-CZB-1528/2020|EPI_ISL_468473|2020-05-03					hCoV-19/USA/WA-UW-5011/2020|EPI_ISL_461433|2020-04-07	V62F		hCoV-19/USA/MD-MDH-0086/2020|EPI_ISL_509490|2020-05-26	1																						Canada/BC_09025513/2020|EPI_ISL_477109|2020-04	T58A		Spain/COV000852/2020|EPI_ISL_452699|2020-03-11	1
USA/CA-CZB-1477/2020|EPI_ISL_468429|2020-05-01					hCoV-19/Sierra_Leone/KGH-G-8625/2020|EPI_ISL_512816|2020-04-10	V62F		hCoV-19/USA/WA-S2444/2020|EPI_ISL_497076|2020-06-16	1																						Canada/BC_20367856/2020|EPI_ISL_477022|2020-04	T58A		Saudi_Arabia/42952/2020|EPI_ISL_469242|2020-03-15	1
USA/NY-NYUMC534/2020|EPI_ISL_444651|2020-03-29					hCoV-19/Sierra_Leone/KGH-G-8790/2020|EPI_ISL_512821|2020-04-27	V62F		hCoV-19/USA/WA-S1824/2020|EPI_ISL_496250|2020-06-02	1																						Canada/BC_10601268/2020|EPI_ISL_477116|2020-04	T58A		Portugal/PT1292/2020|EPI_ISL_511253|2020-03-24	1
USA/NY-NYUMC526/2020|EPI_ISL_444643|2020-03-29					hCoV-19/Sierra_Leone/KGH-G-8668/2020|EPI_ISL_512819|2020-04-11	V62F		hCoV-19/Scotland/EDB2272/2020|EPI_ISL_491531|2020-04-21	1																						Canada/BC_09023420/2020|EPI_ISL_477108|2020-04	T58A		Wales/PHWC-26435/2020|EPI_ISL_422334|2020-03-27	1
USA/NY-NYUMC518/2020|EPI_ISL_444635|2020-03-30					hCoV-19/USA/WA-S2336/2020|EPI_ISL_496968|2020-06-11	V62F		hCoV-19/Sierra_Leone/KGH-G-8626/2020|EPI_ISL_512817|2020-04-10	1																						Canada/BC_07917795/2020|EPI_ISL_477100|2020-04	T58A		Spain/COV001065/2020|EPI_ISL_452611|2020-04-01	1
USA/NY-NYUMC506/2020|EPI_ISL_444623|2020-03-30					hCoV-19/USA/WA-S2020/2020|EPI_ISL_497448|2020-06-05	V62F		hCoV-19/USA/WA-UW-12149/2020|EPI_ISL_501107|2020-06-25	1																						Canada/BC_10600634/2020|EPI_ISL_477115|2020-04	T58A		England/20130034004/2020|EPI_ISL_423604|2020-03-21	1
USA/NY-NYUMC497/2020|EPI_ISL_444614|2020-04-03					hCoV-19/USA/WA-S1811/2020|EPI_ISL_496237|2020-06-02	V62F		hCoV-19/USA/MD-MDH-0084/2020|EPI_ISL_509488|2020-05-25	1																						Canada/BC_09021025/2020|EPI_ISL_477107|2020-04	T58A		Spain/COV001091/2020|EPI_ISL_452595|2020-03-27	1
India/GBRC41/2020|EPI_ISL_444472|2020-04-29					hCoV-19/USA/MD-MDH-0085/2020|EPI_ISL_509489|2020-05-26	V62F		hCoV-19/USA/WA-S2021/2020|EPI_ISL_497449|2020-06-05	1																						Canada/BC_10600259/2020|EPI_ISL_477114|2020-04	T58A		Spain/Palma2543/2020|EPI_ISL_468990|2020-03-17	1
India/GBRC33/2020|EPI_ISL_444464|2020-04-29					hCoV-19/USA/WA-S1809/2020|EPI_ISL_496235|2020-06-02	V62F		hCoV-19/USA/WA-S1309/2020|EPI_ISL_495759|2020-05-14	1																						Canada/BC_09040534/2020|EPI_ISL_477113|2020-04	T58A		Spain/COV000904/2020|EPI_ISL_452663|2020-03-26	1
USA/CA-CZB0746/2020|EPI_ISL_429028|2020-04-03					hCoV-19/USA/WA-S1602/2020|EPI_ISL_496028|2020-05-26	V62F		hCoV-19/USA/WA-S1803/2020|EPI_ISL_496229|2020-06-02	1																						Canada/BC_09009433/2020|EPI_ISL_477105|2020-04	T58A		England/20139015804/2020|EPI_ISL_423343|2020-03-27	1
England/20136097704/2020|EPI_ISL_420655|2020-03-24					hCoV-19/USA/MD-MDH-0086/2020|EPI_ISL_509490|2020-05-26	V62F		hCoV-19/USA/WA-S1980/2020|EPI_ISL_497408|2020-06-03	1																						Canada/BC_10616731/2020|EPI_ISL_477119|2020-04	T58A		Portugal/PT0500/2020|EPI_ISL_454224|2020-03-14	1
USA/CA-CZB-1606/2020|EPI_ISL_468535|2020-04-05					hCoV-19/USA/WA-S2444/2020|EPI_ISL_497076|2020-06-16	V62F		hCoV-19/USA/WA-S2232/2020|EPI_ISL_497660|2020-06-09	1																						Canada/BC_09029034/2020|EPI_ISL_477111|2020-04	T58A		Spain/Zaragoza2440/2020|EPI_ISL_468828|2020-03-28	1
USA/IL-NM087/2020|EPI_ISL_444577|2020-03-19					hCoV-19/USA/WA-S1824/2020|EPI_ISL_496250|2020-06-02	V62F		hCoV-19/USA/WA-S2319/2020|EPI_ISL_496951|2020-06-11	1																						Canada/BC_09026743/2020|EPI_ISL_477110|2020-04	T58A		Spain/Ogijares-COV003033/2020|EPI_ISL_474935|2020-04-06	1
USA/IL-NM074/2020|EPI_ISL_444569|2020-03-16					hCoV-19/Scotland/EDB2272/2020|EPI_ISL_491531|2020-04-21	V62F		hCoV-19/USA/WA-S1807/2020|EPI_ISL_496233|2020-06-02	1																						Bangladesh/BCSIR-NILMRC_115/2020|EPI_ISL_475758|2020-06-07	T58C		Spain/COV001424/2020|EPI_ISL_452477|2020-03-22	1
USA/IL-NM066/2020|EPI_ISL_444561|2020-03-18					hCoV-19/Sierra_Leone/KGH-G-8669/2020|EPI_ISL_512820|2020-04-14	V62F		hCoV-19/USA/WA-S1793/2020|EPI_ISL_496219|2020-06-02	1																						England/NORT-29CBCA/2020|EPI_ISL_484293|2020-05-01	C61T		Portugal/PT0499/2020|EPI_ISL_454223|2020-03-13	1
USA/IL-NM057/2020|EPI_ISL_444553|2020-03-18					hCoV-19/Sierra_Leone/KGH-G-8626/2020|EPI_ISL_512817|2020-04-10	V62F		hCoV-19/USA/WA-S1688/2020|EPI_ISL_496114|2020-05-30	1																						England/BRIS-1229C0/2020|EPI_ISL_440667|2020-04-03	C61T		Spain/Granada-COV003022/2020|EPI_ISL_474894|2020-04-04	1
USA/IL-NM047/2020|EPI_ISL_444545|2020-03-14					hCoV-19/USA/WA-UW-12149/2020|EPI_ISL_501107|2020-06-25	V62F		hCoV-19/USA/WA-S1892/2020|EPI_ISL_496318|2020-05-28	1																						Spain/Zaragoza2458/2020|EPI_ISL_468791|2020-03-26	C61T		England/20139015604/2020|EPI_ISL_423341|2020-03-27	1
USA/IL-NM027/2020|EPI_ISL_444537|2020-03-16					hCoV-19/USA/MD-MDH-0084/2020|EPI_ISL_509488|2020-05-25	V62F		hCoV-19/USA/WA-S2201/2020|EPI_ISL_497629|2020-06-08	1																						England/CAMB-7D208/2020|EPI_ISL_442118|2020-04-06	C61T		Japan/TKY3583/2020|EPI_ISL_462446|2020-03	1
Canada/QC_AC3/2020|EPI_ISL_444507|2020-04-06					hCoV-19/USA/WA-S2021/2020|EPI_ISL_497449|2020-06-05	V62F		hCoV-19/USA/WA-S1948/2020|EPI_ISL_497376|2020-06-03	1																						England/BRIS-1218B5/2020|EPI_ISL_440172|2020-03-14	C61T		Spain/COV000936/2020|EPI_ISL_452636|2020-03-28	1
Canada/QC_AA8/2020|EPI_ISL_444497|2020-04-07					hCoV-19/USA/WA-S1309/2020|EPI_ISL_495759|2020-05-14	V62F		hCoV-19/USA/WA-S1674/2020|EPI_ISL_496100|2020-05-29	1																						England/CAMB-78768/2020|EPI_ISL_477818|2020-04-05	C61T		England/20134000804/2020|EPI_ISL_423045|2020-03-24	1
India/GBRC51/2020|EPI_ISL_444482|2020-05-02					hCoV-19/USA/WA-S1803/2020|EPI_ISL_496229|2020-06-02	V62F		hCoV-19/USA/WA-S1675/2020|EPI_ISL_496101|2020-05-29	1																						England/BRIS-121DB6/2020|EPI_ISL_440098|2020-03-17	C61T		Hungary/UD-10168/2020|EPI_ISL_477008|2020-04-21	1
USA/NY-NYUMC73/2020|EPI_ISL_420589|2020-03-18					hCoV-19/USA/WA-S1980/2020|EPI_ISL_497408|2020-06-03	V62F		hCoV-19/USA/WA-S2200/2020|EPI_ISL_497628|2020-06-08	1																						Denmark/ALAB-SSI260/2020|EPI_ISL_429422|2020-03-10	C61T		England/20132081804/2020|EPI_ISL_423812|2020-03-23	1
USA/NY-NYUMC65/2020|EPI_ISL_420580|2020-03-18					hCoV-19/USA/WA-S2232/2020|EPI_ISL_497660|2020-06-09	V62F		hCoV-19/USA/MD-MDH-0087/2020|EPI_ISL_509491|2020-05-26	1																						England/CAMB-752F1/2020|EPI_ISL_440390|2020-03-17	C61T		Spain/Madrid_H12_2208/2020|EPI_ISL_421178|2020-03-27	1
Italy/6193/2020|EPI_ISL_420568|2020-03-23					hCoV-19/USA/WA-S2319/2020|EPI_ISL_496951|2020-06-11	V62F		hCoV-19/USA/WA-S2329/2020|EPI_ISL_496961|2020-06-10	1																						England/BRIS-121994/2020|EPI_ISL_440196|2020-03-15	C61T		Spain/AN-004022/2020|EPI_ISL_500161|2020-04-27	1
England/20139018202/2020|EPI_ISL_420523|2020-03-26					hCoV-19/USA/WA-S1807/2020|EPI_ISL_496233|2020-06-02	V62F		hCoV-19/USA/WA-S2267/2020|EPI_ISL_497695|2020-06-09	1																						England/BRIS-12A2FA/2020|EPI_ISL_458343|2020-04-16	C61T		Spain/AN-003996/2020|EPI_ISL_500193|2020-04-20	1
England/20134040703/2020|EPI_ISL_420515|2020-03-24					hCoV-19/USA/WA-S1793/2020|EPI_ISL_496219|2020-06-02	V62F		hCoV-19/USA/FL-QDX-226/2020|EPI_ISL_498707|2020-04-16	1																						England/CAMB-1AB886/2020|EPI_ISL_470259|2020-04-21	C61T		Portugal/PT1265/2020|EPI_ISL_511226|2020-03-19	1
England/20132072602/2020|EPI_ISL_420507|2020-03-20					hCoV-19/USA/WA-S1688/2020|EPI_ISL_496114|2020-05-30	V62F		hCoV-19/Spain/CM-003913/2020|EPI_ISL_500218|2020-04-28	1																						Spain/AN-006091/2020|EPI_ISL_510427|2020-05-08	C61T		Spain/PV-004210/2020|EPI_ISL_510495|2020-04-03	1
Germany/NRW-32/2020|EPI_ISL_419549|2020-03-15					hCoV-19/USA/WA-S1892/2020|EPI_ISL_496318|2020-05-28	V62F		hCoV-19/North_Macedonia/ChVir7908/2020|EPI_ISL_492079|2020-06-26	1																						Spain/AN-003995/2020|EPI_ISL_500160|2020-04-20	C61T		Spain/MD-006421/2020|EPI_ISL_510136|2020-05-14	1
Germany/NRW-24/2020|EPI_ISL_419541|2020-03-14					hCoV-19/USA/WA-S2201/2020|EPI_ISL_497629|2020-06-08	V62F		hCoV-19/India/NCDC-3965/2020|EPI_ISL_436444|2020-04-09	1																						Spain/AN-004012/2020|EPI_ISL_500217|2020-04-22	C61T		Spain/AN-003987/2020|EPI_ISL_500220|2020-04-16	1
USA/CT-Yale-028/2020|EPI_ISL_419521|2020-03-18					hCoV-19/USA/WA-S1948/2020|EPI_ISL_497376|2020-06-03	V62F		hCoV-19/India/ILSCV25594/2020|EPI_ISL_481115|2020-05-19	1																						Bangladesh/BCSIR-NILMRC_280/2020|EPI_ISL_498419|2020-07-21	C61T		Bangladesh/BCSIR-NILMRC_115/2020|EPI_ISL_475758|2020-06-07	1
USA/CT-Yale-045/2020|EPI_ISL_419513|2020-03-23					hCoV-19/USA/WA-S1674/2020|EPI_ISL_496100|2020-05-29	V62F		hCoV-19/Australia/NSW297/2020|EPI_ISL_451561|2020-04-02	1																						India/MN1/2020|EPI_ISL_508415|2020-06-16	C61T		England/NORT-29CBCA/2020|EPI_ISL_484293|2020-05-01	1
Spain/Zaragoza2478/2020|EPI_ISL_468794|2020-03-27					hCoV-19/USA/WA-S1675/2020|EPI_ISL_496101|2020-05-29	V62F		hCoV-19/England/BRIS-12BE8C/2020|EPI_ISL_469346|2020-05-08	1																						Spain/AN-003961/2020|EPI_ISL_500178|2020-04-10	C61T		England/BRIS-1229C0/2020|EPI_ISL_440667|2020-04-03	1
Spain/Zaragoza2483/2020|EPI_ISL_468785|2020-03-24					hCoV-19/USA/WA-S2200/2020|EPI_ISL_497628|2020-06-08	V62F		hCoV-19/USA/NM-UNM-00398/2020|EPI_ISL_508060|2020-04-17	1																						England/NORT-29E014/2020|EPI_ISL_493504|2020-05-06	C61T		Spain/Zaragoza2458/2020|EPI_ISL_468791|2020-03-26	1
USA/IL-NM023/2020|EPI_ISL_444533|2020-03-14					hCoV-19/USA/MD-MDH-0087/2020|EPI_ISL_509491|2020-05-26	V62F		hCoV-19/USA/NM-UNM-00350/2020|EPI_ISL_508005|2020-04-06	1																						Spain/AN-004006/2020|EPI_ISL_500173|2020-04-21	C61T		England/CAMB-7D208/2020|EPI_ISL_442118|2020-04-06	1
USA/IL-NM014/2020|EPI_ISL_444525|2020-03-15					hCoV-19/USA/WA-S2329/2020|EPI_ISL_496961|2020-06-10	V62F		hCoV-19/USA/AZ-UNM-00375/2020|EPI_ISL_508045|2020-05-13	1																						Spain/AN-004023/2020|EPI_ISL_500201|2020-04-27	C61T		England/BRIS-1218B5/2020|EPI_ISL_440172|2020-03-14	1
Canada/QC_AD5/2020|EPI_ISL_444515|2020-04-06					hCoV-19/USA/WA-S2267/2020|EPI_ISL_497695|2020-06-09	V62F		hCoV-19/USA/NM-UNM-00374/2020|EPI_ISL_508013|2020-05-11	1																						Spain/AN-003999/2020|EPI_ISL_500195|2020-04-20	C61T		England/CAMB-78768/2020|EPI_ISL_477818|2020-04-05	1
USA/WA-S156/2020|EPI_ISL_430193|2020-03-16					hCoV-19/USA/FL-QDX-226/2020|EPI_ISL_498707|2020-04-16	V62F		hCoV-19/USA/NM-UNM-00332/2020|EPI_ISL_507995|2020-05-22	1																						Spain/AN-004002/2020|EPI_ISL_500198|2020-04-20	C61T		England/BRIS-121DB6/2020|EPI_ISL_440098|2020-03-17	1
USA/WA-S148/2020|EPI_ISL_430185|2020-03-13					hCoV-19/Spain/CM-003913/2020|EPI_ISL_500218|2020-04-28	N64K		hCoV-19/USA/NM-UNM-00364/2020|EPI_ISL_508082|2020-04-30	1																						Spain/AN-003991/2020|EPI_ISL_500190|2020-04-17	C61T		Denmark/ALAB-SSI260/2020|EPI_ISL_429422|2020-03-10	1
USA/NY-NYUMC59/2020|EPI_ISL_420574|2020-03-18					hCoV-19/North_Macedonia/ChVir7908/2020|EPI_ISL_492079|2020-06-26	N64S		hCoV-19/USA/NM-UNM-00386/2020|EPI_ISL_508075|2020-04-12	1																						Spain/AN-004001/2020|EPI_ISL_500197|2020-04-20	C61T		England/CAMB-752F1/2020|EPI_ISL_440390|2020-03-17	1
Spain/Zaragoza2482/2020|EPI_ISL_468857|2020-03-23					hCoV-19/India/NCDC-3965/2020|EPI_ISL_436444|2020-04-09	L65M		hCoV-19/Spain/Zaragoza2482/2020|EPI_ISL_468857|2020-03-23	1																						Spain/AN-003985/2020|EPI_ISL_500188|2020-04-16	C61T		England/BRIS-121994/2020|EPI_ISL_440196|2020-03-15	1
Spain/Zaragoza2446/2020|EPI_ISL_468803|2020-03-17					hCoV-19/India/ILSCV25594/2020|EPI_ISL_481115|2020-05-19	N66T		hCoV-19/Guangzhou/GZMU0049/2020|EPI_ISL_429094|2020-02-08	1																						South_Africa/LR00146/2020|EPI_ISL_514414|2020-07-20	C61T		England/BRIS-12A2FA/2020|EPI_ISL_458343|2020-04-16	1
USA/WA-S169/2020|EPI_ISL_430207|2020-03-18					hCoV-19/Australia/NSW297/2020|EPI_ISL_451561|2020-04-02	N66H		hCoV-19/Wuhan/HB-WH1-130/2020|EPI_ISL_454909|2020-03-02	1																						Spain/AN-004020/2020|EPI_ISL_500206|2020-04-24	C61T		England/CAMB-1AB886/2020|EPI_ISL_470259|2020-04-21	1
USA/UT-0349/2020|EPI_ISL_420822|2020-03-25					hCoV-19/England/BRIS-12BE8C/2020|EPI_ISL_469346|2020-05-08	N66H		hCoV-19/Sweden/20-51044/2020|EPI_ISL_450831|2020-04-27	1																						Spain/AN-003951/2020|EPI_ISL_500175|2020-04-07	C61T		Spain/AN-006091/2020|EPI_ISL_510427|2020-05-08	1
Spain/Donostia-San_Sebastian2118/2020|EPI_ISL_468897|2020-04-11					hCoV-19/USA/NM-UNM-00398/2020|EPI_ISL_508060|2020-04-17	N66T		hCoV-19/England/OXON-ACBAB/2020|EPI_ISL_448515|2020-04-06	1																						Spain/AN-003998/2020|EPI_ISL_500194|2020-04-20	C61T		Spain/AN-003995/2020|EPI_ISL_500160|2020-04-20	1
Spain/Donostia-San_Sebastian2119/2020|EPI_ISL_468887|2020-04-11					hCoV-19/USA/NM-UNM-00350/2020|EPI_ISL_508005|2020-04-06	N66T		hCoV-19/England/CAMB-1AECF0/2020|EPI_ISL_448073|2020	1																						Spain/AN-004000/2020|EPI_ISL_500196|2020-04-20	C61T		Spain/AN-004012/2020|EPI_ISL_500217|2020-04-22	1
Spain/Donostia-San_Sebastian2073/2020|EPI_ISL_468877|2020-04-10					hCoV-19/USA/AZ-UNM-00375/2020|EPI_ISL_508045|2020-05-13	N66T		hCoV-19/England/CAMB-1ADB6D/2020|EPI_ISL_448038|2020	1																						Spain/AN-003984/2020|EPI_ISL_500187|2020-04-16	C61T		Bangladesh/BCSIR-NILMRC_280/2020|EPI_ISL_498419|2020-07-21	1
Spain/Donostia-San_Sebastian2116/2020|EPI_ISL_468869|2020-04-11					hCoV-19/USA/NM-UNM-00374/2020|EPI_ISL_508013|2020-05-11	N66T		hCoV-19/England/CAMB-1B2BA1/2020|EPI_ISL_456708|2020-05-19	1																						South_Africa/KRISP-0584/2020|EPI_ISL_498122|2020-07-07	T62C		India/MN1/2020|EPI_ISL_508415|2020-06-16	1
Spain/Donostia-San_Sebastian2151/2020|EPI_ISL_468860|2020-04-12					hCoV-19/USA/NM-UNM-00332/2020|EPI_ISL_507995|2020-05-22	N66T		hCoV-19/England/CAMB-1B2637/2020|EPI_ISL_456700|2020-05-19	1																						England/LOND-D3A26/2020|EPI_ISL_441024|2020-04-06	T63A		Spain/AN-003961/2020|EPI_ISL_500178|2020-04-10	1
Spain/Zaragoza2453/2020|EPI_ISL_468831|2020-03-24					hCoV-19/USA/NM-UNM-00364/2020|EPI_ISL_508082|2020-04-30	N66T		hCoV-19/England/CAMB-1AEDA2/2020|EPI_ISL_452862|2020-05-09	1																						Iceland/586/2020|EPI_ISL_424606|2020-03-28	G64T		England/NORT-29E014/2020|EPI_ISL_493504|2020-05-06	1
Spain/Teruel2394/2020|EPI_ISL_468823|2020-03-24					hCoV-19/USA/NM-UNM-00386/2020|EPI_ISL_508075|2020-04-12	N66T		hCoV-19/Sweden/20-51816/2020|EPI_ISL_475568|2020-06-01	1																						Australia/VIC761/2020|EPI_ISL_427037|2020-03-30	C65T		Spain/AN-004006/2020|EPI_ISL_500173|2020-04-21	1
Spain/Zaragoza2422/2020|EPI_ISL_468815|2020-03-24					hCoV-19/Spain/Zaragoza2482/2020|EPI_ISL_468857|2020-03-23	S68F		hCoV-19/England/NOTT-11038B/2020|EPI_ISL_441506|2020-04-16	1																						Denmark/ALAB-SSI-625/2020|EPI_ISL_437005|2020-03-24	C65T		Spain/AN-004023/2020|EPI_ISL_500201|2020-04-27	1
USA/WA-S256/2020|EPI_ISL_430294|2020-03-02					hCoV-19/Guangzhou/GZMU0049/2020|EPI_ISL_429094|2020-02-08	S68C		hCoV-19/England/20190141101/2020|EPI_ISL_465592|2020-05-04	1																						England/NORT-29AF0C/2020|EPI_ISL_493488|2020-05-26	T68G		Spain/AN-003999/2020|EPI_ISL_500195|2020-04-20	1
USA/WA-S248/2020|EPI_ISL_430286|2020-03-10					hCoV-19/Wuhan/HB-WH1-130/2020|EPI_ISL_454909|2020-03-02	S68C		hCoV-19/Sweden/20-50935/2020|EPI_ISL_475162|2020-04-21	1																						Wales/PHWC-2BD17/2020|EPI_ISL_445837|2020-04-07	C69T		Spain/AN-004002/2020|EPI_ISL_500198|2020-04-20	1
USA/WA-S240/2020|EPI_ISL_430278|2020-03-06					hCoV-19/Sweden/20-51044/2020|EPI_ISL_450831|2020-04-27	S68F		hCoV-19/Wuhan/HB-WH1-133/2020|EPI_ISL_455366|2020-02-23	1																						Netherlands/NA_436/2020|EPI_ISL_455238|2020-04-07	C69T		Spain/AN-003991/2020|EPI_ISL_500190|2020-04-17	1
USA/WA-S232/2020|EPI_ISL_430270|2020-03-08					hCoV-19/England/OXON-ACBAB/2020|EPI_ISL_448515|2020-04-06	S68F		hCoV-19/Wales/PHWC-289DA/2020|EPI_ISL_445384|2020-04-01	1																						Netherlands/NA_427/2020|EPI_ISL_455229|2020-04-06	C69T		Spain/AN-004001/2020|EPI_ISL_500197|2020-04-20	1
USA/WA-S224/2020|EPI_ISL_430262|2020-03-19					hCoV-19/England/CAMB-1AECF0/2020|EPI_ISL_448073|2020	S68F		hCoV-19/Singapore/97/2020|EPI_ISL_443189|2020-03-18	1																						Netherlands/Utrecht_10025/2020|EPI_ISL_454774|2020-03-27	C69T		Spain/AN-003985/2020|EPI_ISL_500188|2020-04-16	1
USA/WA-S194/2020|EPI_ISL_430232|2020-03-20					hCoV-19/England/CAMB-1ADB6D/2020|EPI_ISL_448038|2020	S68F		hCoV-19/England/LIVE-9EA90/2020|EPI_ISL_453360|2020-04-04	1																						USA/MI-QDX-28/2020|EPI_ISL_467869|2020-03-15	C69T		South_Africa/LR00146/2020|EPI_ISL_514414|2020-07-20	1
USA/WA-S186/2020|EPI_ISL_430224|2020-03-20					hCoV-19/England/CAMB-1B2BA1/2020|EPI_ISL_456708|2020-05-19	S68F		hCoV-19/USA/MA-MGH-00688/2020|EPI_ISL_460257|2020-04-06	1																						Netherlands/NA_435/2020|EPI_ISL_455237|2020-04-07	C69T		Spain/AN-004020/2020|EPI_ISL_500206|2020-04-24	1
USA/WA-S178/2020|EPI_ISL_430216|2020-03-20					hCoV-19/England/CAMB-1B2637/2020|EPI_ISL_456700|2020-05-19	S68F		hCoV-19/England/LIVE-9D76D/2020|EPI_ISL_453231|2020-04-15	1																						Netherlands/NA_426/2020|EPI_ISL_455228|2020-04-06	C69T		Spain/AN-003951/2020|EPI_ISL_500175|2020-04-07	1
Spain/Zaragoza2395/2020|EPI_ISL_468853|2020-03-23					hCoV-19/England/CAMB-1AEDA2/2020|EPI_ISL_452862|2020-05-09	S68F		hCoV-19/England/LIVE-9A5C0/2020|EPI_ISL_449351|2020-03-26	1																						Netherlands/Utrecht_10020/2020|EPI_ISL_454769|2020-03-24	C69T		Spain/AN-003998/2020|EPI_ISL_500194|2020-04-20	1
Spain/Zaragoza2413/2020|EPI_ISL_468845|2020-03-23					hCoV-19/Sweden/20-51816/2020|EPI_ISL_475568|2020-06-01	S68F		hCoV-19/USA/MA-MGH-00642/2020|EPI_ISL_460148|2020-04-01	1																						Canada/QC_AZ3/2020|EPI_ISL_463959|2020-04-11	C69T		Spain/AN-004000/2020|EPI_ISL_500196|2020-04-20	1
Canada/BC_15918444/2020|EPI_ISL_468678|2020-04					hCoV-19/England/NOTT-11038B/2020|EPI_ISL_441506|2020-04-16	S68F		hCoV-19/England/LIVE-9D7C7/2020|EPI_ISL_453233|2020-04-15	1																						USA/MI-MDHHS-SC20148/2020|EPI_ISL_436856|2020-03-24	C69T		Spain/AN-003984/2020|EPI_ISL_500187|2020-04-16	1
Canada/BC_15478567/2020|EPI_ISL_468670|2020-04					hCoV-19/England/20190141101/2020|EPI_ISL_465592|2020-05-04	S68F		hCoV-19/Japan/PG-0285/2020|EPI_ISL_479964|2020-03-23	1																						Wales/PHWC-35679/2020|EPI_ISL_474459|2020-04-24	C69T		South_Africa/KRISP-0584/2020|EPI_ISL_498122|2020-07-07	1
Canada/BC_15188754/2020|EPI_ISL_468662|2020-04					hCoV-19/Sweden/20-50935/2020|EPI_ISL_475162|2020-04-21	S68F		hCoV-19/England/CAMB-1B1DAC/2020|EPI_ISL_458516|2020-05-09	1																						Wales/PHWC-32CA7/2020|EPI_ISL_446674|2020-04-06	C69T		England/LOND-D3A26/2020|EPI_ISL_441024|2020-04-06	1
USA/WA-S216/2020|EPI_ISL_430254|2020-03-20					hCoV-19/Wuhan/HB-WH1-133/2020|EPI_ISL_455366|2020-02-23	S68C		hCoV-19/England/NORT-296410/2020|EPI_ISL_488017|2020-05-13	1																						Netherlands/Utrecht_10017/2020|EPI_ISL_454766|2020-03-23	C69T		Iceland/586/2020|EPI_ISL_424606|2020-03-28	1
USA/WA-S207/2020|EPI_ISL_430245|2020-03-20					hCoV-19/Wales/PHWC-289DA/2020|EPI_ISL_445384|2020-04-01	S68Y		hCoV-19/England/NORT-29C878/2020|EPI_ISL_484284|2020-05-02	1																						Netherlands/NA_425/2020|EPI_ISL_455227|2020-04-03	C69T		Australia/VIC761/2020|EPI_ISL_427037|2020-03-30	1
USA/WA-S199/2020|EPI_ISL_430237|2020-03-20					hCoV-19/Singapore/97/2020|EPI_ISL_443189|2020-03-18	S68F		hCoV-19/England/NORT-29DD3C/2020|EPI_ISL_484315|2020-05-07	1																						Portugal/PT0602/2020|EPI_ISL_454325|2020-04-09	C69T		Denmark/ALAB-SSI-625/2020|EPI_ISL_437005|2020-03-24	1
Germany/BAV-V2010492/2020|EPI_ISL_420899|2020-03-11					hCoV-19/England/LIVE-9EA90/2020|EPI_ISL_453360|2020-04-04	S68F		hCoV-19/England/NORT-29EA52/2020|EPI_ISL_490470|2020-05-18	1																						England/NORT-29DC4E/2020|EPI_ISL_484312|2020-05-07	C69T		England/NORT-29AF0C/2020|EPI_ISL_493488|2020-05-26	1
Canada/BC_17847248/2020|EPI_ISL_468692|2020-04					hCoV-19/USA/MA-MGH-00688/2020|EPI_ISL_460257|2020-04-06	S68F		hCoV-19/Scotland/GCVR-1739EE/2020|EPI_ISL_459113|2020-04-07	1																						Netherlands/NA_432/2020|EPI_ISL_455234|2020-04-06	C69T		Wales/PHWC-2BD17/2020|EPI_ISL_445837|2020-04-07	1
Canada/BC_16839757/2020|EPI_ISL_468684|2020-04					hCoV-19/England/LIVE-9D76D/2020|EPI_ISL_453231|2020-04-15	S68F		hCoV-19/Scotland/CVR2908/2020|EPI_ISL_484652|2020-04-22	1																						Netherlands/NA_424/2020|EPI_ISL_455226|2020-04-02	C69T		Netherlands/NA_436/2020|EPI_ISL_455238|2020-04-07	1
USA/NY-NYUMC612/2020|EPI_ISL_444729|2020-04-01					hCoV-19/England/LIVE-9A5C0/2020|EPI_ISL_449351|2020-03-26	S68F		hCoV-19/Russia/StPetersburg-RII4597S/2020|EPI_ISL_427319|2020-04-04	1																						Portugal/PT0629/2020|EPI_ISL_454352|2020-04-06	C69T		Netherlands/NA_427/2020|EPI_ISL_455229|2020-04-06	1
USA/NY-NYUMC595/2020|EPI_ISL_444712|2020-04-02					hCoV-19/USA/MA-MGH-00642/2020|EPI_ISL_460148|2020-04-01	S68F		hCoV-19/USA/NY-NYUMC351/2020|EPI_ISL_430378|2020-04-07	1																						USA/WA-S1096/2020|EPI_ISL_463586|2020-05-01	C69T		Netherlands/Utrecht_10025/2020|EPI_ISL_454774|2020-03-27	1
USA/NY-NYUMC586/2020|EPI_ISL_444703|2020-03-30					hCoV-19/England/LIVE-9D7C7/2020|EPI_ISL_453233|2020-04-15	S68F		hCoV-19/England/LIVE-99A1D/2020|EPI_ISL_439787|2020-04-12	1																						Canada/QC_AF6/2020|EPI_ISL_463912|2020-04-06	C69T		USA/MI-QDX-28/2020|EPI_ISL_467869|2020-03-15	1
Guangzhou/GZMU0049/2020|EPI_ISL_429094|2020-02-08					hCoV-19/Japan/PG-0285/2020|EPI_ISL_479964|2020-03-23	S68F		hCoV-19/Sweden/20-07861/2020|EPI_ISL_450822|2020-04-23	1																						Pakistan/NIH-HAS001/2020|EPI_ISL_468163|2020-06-02	C69T		Netherlands/NA_435/2020|EPI_ISL_455237|2020-04-07	1
England/20142022504/2020|EPI_ISL_420765|2020-03-27					hCoV-19/England/CAMB-1B1DAC/2020|EPI_ISL_458516|2020-05-09	S68F		hCoV-19/England/CAMB-1AECE1/2020|EPI_ISL_448072|2020	1																						USA/CT-UW-6587/2020|EPI_ISL_461412|2020-04-03	C69T		Netherlands/NA_426/2020|EPI_ISL_455228|2020-04-06	1
England/20140039504/2020|EPI_ISL_420757|2020-03-27					hCoV-19/England/NORT-296410/2020|EPI_ISL_488017|2020-05-13	S68F		hCoV-19/England/EXET-136EAC/2020|EPI_ISL_471930|2020-04-21	1																						USA/CT-UW-3119/2020|EPI_ISL_485937|2020-03-26	C69T		Netherlands/Utrecht_10020/2020|EPI_ISL_454769|2020-03-24	1
USA/NY-NYUMC43/2020|EPI_ISL_419704|2020-03-18					hCoV-19/England/NORT-29C878/2020|EPI_ISL_484284|2020-05-02	S68F		hCoV-19/England/CAMB-1B2C08/2020|EPI_ISL_456713|2020-05-19	1																						Netherlands/NA_431/2020|EPI_ISL_455233|2020-04-06	C69T		Canada/QC_AZ3/2020|EPI_ISL_463959|2020-04-11	1
Spain/Zaragoza2470/2020|EPI_ISL_468773|2020-03-28					hCoV-19/England/NORT-29DD3C/2020|EPI_ISL_484315|2020-05-07	S68F		hCoV-19/England/CAMB-1AED93/2020|EPI_ISL_452861|2020-05-09	1																						Australia/VIC727/2020|EPI_ISL_427007|2020-03-29	C69T		USA/MI-MDHHS-SC20148/2020|EPI_ISL_436856|2020-03-24	1
Spain/Logrono_h2285/2020|EPI_ISL_468764|2020-03-01					hCoV-19/England/NORT-29EA52/2020|EPI_ISL_490470|2020-05-18	S68F		hCoV-19/England/CAMB-1B054B/2020|EPI_ISL_452890|2020-05-11	1																						England/NORT-29DC7B/2020|EPI_ISL_488084|2020-05-07	C69T		Wales/PHWC-35679/2020|EPI_ISL_474459|2020-04-24	1
Chile/Copiapo-00014/2020|EPI_ISL_468756|2020-04-30					hCoV-19/Scotland/GCVR-1739EE/2020|EPI_ISL_459113|2020-04-07	S68F		hCoV-19/England/NORT-283E63/2020|EPI_ISL_472257|2020-04-05	1																						England/NORT-2961EC/2020|EPI_ISL_484265|2020-05-19	C69T		Wales/PHWC-32CA7/2020|EPI_ISL_446674|2020-04-06	1
Chile/Santiago-05207/2020|EPI_ISL_468748|2020-04-30					hCoV-19/Scotland/CVR2908/2020|EPI_ISL_484652|2020-04-22	S68F		hCoV-19/England/CAMB-1B193F/2020|EPI_ISL_452983|2020-05-13	1																						England/NORT-29DBAB/2020|EPI_ISL_484310|2020-05-07	C69T		Netherlands/Utrecht_10017/2020|EPI_ISL_454766|2020-03-23	1
Belgium/UGent-91/2020|EPI_ISL_468739|2020-03-13					hCoV-19/Russia/StPetersburg-RII4597S/2020|EPI_ISL_427319|2020-04-04	S68F		hCoV-19/Sweden/20-14071/2020|EPI_ISL_475541|2020-04-28	1																						Belgium/ULG-9647/2020|EPI_ISL_418653|2020-04-05	C69T		Netherlands/NA_425/2020|EPI_ISL_455227|2020-04-03	1
USA/NY-NYUMC673/2020|EPI_ISL_444790|2020-03-18					hCoV-19/USA/NY-NYUMC351/2020|EPI_ISL_430378|2020-04-07	S68F		hCoV-19/Sweden/20-50933/2020|EPI_ISL_475161|2020-04-20	1																						Netherlands/NA_430/2020|EPI_ISL_455232|2020-04-06	C69T		Portugal/PT0602/2020|EPI_ISL_454325|2020-04-09	1
USA/NY-NYUMC665/2020|EPI_ISL_444782|2020-03-18					hCoV-19/England/LIVE-99A1D/2020|EPI_ISL_439787|2020-04-12	S68F		hCoV-19/Wuhan/HB-WH3-174/2020|EPI_ISL_455376|2020-02-28	1																						Canada/QC_BA5/2020|EPI_ISL_463962|2020-04-07	C69T		England/NORT-29DC4E/2020|EPI_ISL_484312|2020-05-07	1
USA/WA-S134/2020|EPI_ISL_430171|2020-03-13					hCoV-19/Sweden/20-07861/2020|EPI_ISL_450822|2020-04-23	S68F		hCoV-19/Wales/PHWC-2AF12/2020|EPI_ISL_432414|2020-04-06	1																						Pakistan/NIH-44905/2020|EPI_ISL_468159|2020-06-02	C69T		Netherlands/NA_432/2020|EPI_ISL_455234|2020-04-06	1
USA/WA-S126/2020|EPI_ISL_430163|2020-03-13					hCoV-19/England/CAMB-1AECE1/2020|EPI_ISL_448072|2020	S68F		hCoV-19/Wuhan/HB-WH1-123/2020|EPI_ISL_455363|2020-03-02	1																						England/NORT-29DBBA/2020|EPI_ISL_488082|2020-05-07	C69T		Netherlands/NA_424/2020|EPI_ISL_455226|2020-04-02	1
USA/WA-S298/2020|EPI_ISL_430152|2020-03-05					hCoV-19/England/EXET-136EAC/2020|EPI_ISL_471930|2020-04-21	S68F		hCoV-19/England/LIVE-9F033/2020|EPI_ISL_453421|2020-04-15	1																						Netherlands/NA_429/2020|EPI_ISL_455231|2020-04-06	C69T		Portugal/PT0629/2020|EPI_ISL_454352|2020-04-06	1
USA/WA-S290/2020|EPI_ISL_430144|2020-03-23					hCoV-19/England/CAMB-1B2C08/2020|EPI_ISL_456713|2020-05-19	S68F		hCoV-19/England/CAMB-1AFCE0/2020|EPI_ISL_459225|2020-05-04	1																						Wales/PHWC-3183B/2020|EPI_ISL_446495|2020-04-10	C69T		USA/WA-S1096/2020|EPI_ISL_463586|2020-05-01	1
USA/WA-S282/2020|EPI_ISL_430136|2020-03-10					hCoV-19/England/CAMB-1AED93/2020|EPI_ISL_452861|2020-05-09	S68F		hCoV-19/England/CAMB-1B12AD/2020|EPI_ISL_459185|2020-05-06	1																						Wales/PHWC-15D847/2020|EPI_ISL_472744|2020-05-14	C69T		Canada/QC_AF6/2020|EPI_ISL_463912|2020-04-06	1
Sweden/20-50232/2020|EPI_ISL_429156|2020-03-09					hCoV-19/England/CAMB-1B054B/2020|EPI_ISL_452890|2020-05-11	S68F		hCoV-19/England/CAMB-1B1E21/2020|EPI_ISL_458524|2020-05-09	1																						England/NORT-2964D4/2020|EPI_ISL_488038|2020-04-12	C69T		Pakistan/NIH-HAS001/2020|EPI_ISL_468163|2020-06-02	1
England/20140038604/2020|EPI_ISL_420750|2020-03-23					hCoV-19/England/NORT-283E63/2020|EPI_ISL_472257|2020-04-05	S68F		hCoV-19/England/NORT-2827A5/2020|EPI_ISL_488544|2020-03-27	1																						Netherlands/Friesland_33/2020|EPI_ISL_460848|2020-04-14	C69T		USA/CT-UW-6587/2020|EPI_ISL_461412|2020-04-03	1
USA/LA-BIE-026/2020|EPI_ISL_468715|2020-04-06					hCoV-19/England/CAMB-1B193F/2020|EPI_ISL_452983|2020-05-13	S68F		hCoV-19/England/NORT-296FE2/2020|EPI_ISL_488145|2020-04-23	1																						Netherlands/NA_437/2020|EPI_ISL_455239|2020-04-08	C69T		USA/CT-UW-3119/2020|EPI_ISL_485937|2020-03-26	1
Canada/BC_18143554/2020|EPI_ISL_468700|2020-04					hCoV-19/Sweden/20-14071/2020|EPI_ISL_475541|2020-04-28	S68F		hCoV-19/England/NORT-297664/2020|EPI_ISL_488036|2020-04-22	1																						Netherlands/NA_428/2020|EPI_ISL_455230|2020-04-06	C69T		Netherlands/NA_431/2020|EPI_ISL_455233|2020-04-06	1
USA/NY-NYUMC651/2020|EPI_ISL_444768|2020-04-06					hCoV-19/Sweden/20-50933/2020|EPI_ISL_475161|2020-04-20	S68F		hCoV-19/England/CAMB-1AFD0B/2020|EPI_ISL_459221|2020-05-04	1																						Wales/PHWC-168481/2020|EPI_ISL_494245|2020-04-19	C69T		Australia/VIC727/2020|EPI_ISL_427007|2020-03-29	1
USA/NY-NYUMC643/2020|EPI_ISL_444760|2020-04-03					hCoV-19/Wuhan/HB-WH3-174/2020|EPI_ISL_455376|2020-02-28	S68C		hCoV-19/England/CAMB-1AFD47/2020|EPI_ISL_459212|2020-05-04	1																						Belgium/ULG-10253/2020|EPI_ISL_515060|2020-7-18	C69T		England/NORT-29DC7B/2020|EPI_ISL_488084|2020-05-07	1
USA/NY-NYUMC635/2020|EPI_ISL_444752|2020-04-02					hCoV-19/Wales/PHWC-2AF12/2020|EPI_ISL_432414|2020-04-06	S68Y		hCoV-19/England/CAMB-1AFD29/2020|EPI_ISL_459203|2020-05-04	1																						India/IK42/2020|EPI_ISL_508370|2020-05-04	C69T		England/NORT-2961EC/2020|EPI_ISL_484265|2020-05-19	1
USA/NY-NYUMC626/2020|EPI_ISL_444743|2020-04-02					hCoV-19/Wuhan/HB-WH1-123/2020|EPI_ISL_455363|2020-03-02	S68C		hCoV-19/England/CAMB-1B2AFF/2020|EPI_ISL_469907|2020-05-16	1																						Wales/PHWC-168ACB/2020|EPI_ISL_494326|2020-04-19	C69T		England/NORT-29DBAB/2020|EPI_ISL_484310|2020-05-07	1
USA/NY-NYUMC618/2020|EPI_ISL_444735|2020-04-02					hCoV-19/England/LIVE-9F033/2020|EPI_ISL_453421|2020-04-15	S68F		hCoV-19/Scotland/GCVR-17228A/2020|EPI_ISL_469993|2020-03-30	1																						USA/CA-IGI-0080/2020|EPI_ISL_511834|2020-06-11	C69T		Belgium/ULG-9647/2020|EPI_ISL_418653|2020-04-05	1
USA/WA-S276/2020|EPI_ISL_430130|2020-04-01					hCoV-19/England/CAMB-1AFCE0/2020|EPI_ISL_459225|2020-05-04	S68F		hCoV-19/Scotland/GCVR-171A92/2020|EPI_ISL_489530|2020-03-27	1																						England/CAMB-7FDAB/2020|EPI_ISL_444413|2020-04-20	G70A		Netherlands/NA_430/2020|EPI_ISL_455232|2020-04-06	1
USA/WA-S268/2020|EPI_ISL_430122|2020-03-05					hCoV-19/England/CAMB-1B12AD/2020|EPI_ISL_459185|2020-05-06	S68F		hCoV-19/Sweden/20-07860/2020|EPI_ISL_450821|2020-04-23	1																						England/CAMB-7B12B/2020|EPI_ISL_433921|2020-04-11	G70A		Canada/QC_BA5/2020|EPI_ISL_463962|2020-04-07	1
USA/WA-S260/2020|EPI_ISL_430114|2020-03-12					hCoV-19/England/CAMB-1B1E21/2020|EPI_ISL_458524|2020-05-09	S68F		hCoV-19/USA/MI-MDHHS-SC20723/2020|EPI_ISL_471747|2020-04-20	1																						Spain/COV001524/2020|EPI_ISL_467135|2020-03-19	G70A		Pakistan/NIH-44905/2020|EPI_ISL_468159|2020-06-02	1
Sweden/20-50131/2020|EPI_ISL_429142|2020-03-06					hCoV-19/England/NORT-2827A5/2020|EPI_ISL_488544|2020-03-27	S68F		hCoV-19/England/CAMB-1AED84/2020|EPI_ISL_452860|2020-05-09	1																						England/CAMB-1B046C/2020|EPI_ISL_459276|2020-05-01	G70A		England/NORT-29DBBA/2020|EPI_ISL_488082|2020-05-07	1
Sweden/20-08693/2020|EPI_ISL_429134|2020-03-24					hCoV-19/England/NORT-296FE2/2020|EPI_ISL_488145|2020-04-23	S68F		hCoV-19/England/CAMB-1B0675/2020|EPI_ISL_452904|2020-05-09	1																						Scotland/CVR2840/2020|EPI_ISL_448196|2020-04-21	G70A		Netherlands/NA_429/2020|EPI_ISL_455231|2020-04-06	1
Sweden/20-08170/2020|EPI_ISL_429124|2020-03-12					hCoV-19/England/NORT-297664/2020|EPI_ISL_488036|2020-04-22	S68F		hCoV-19/England/20192020301/2020|EPI_ISL_465598|2020-05-04	1																						England/SHEF-D2B51/2020|EPI_ISL_442511|2020-04-12	G70A		Wales/PHWC-3183B/2020|EPI_ISL_446495|2020-04-10	1
Sweden/20-08143/2020|EPI_ISL_429116|2020-03-15					hCoV-19/England/CAMB-1AFD0B/2020|EPI_ISL_459221|2020-05-04	S68F		hCoV-19/Sweden/20-50931/2020|EPI_ISL_475160|2020-04-20	1																						England/CAMB-1AEBB7/2020|EPI_ISL_448056|2020-05-01	G70A		Wales/PHWC-15D847/2020|EPI_ISL_472744|2020-05-14	1
England/201121365/2020|EPI_ISL_464694|2020-03-10					hCoV-19/England/CAMB-1AFD47/2020|EPI_ISL_459212|2020-05-04	S68F		hCoV-19/Wuhan/HB-WH1-129/2020|EPI_ISL_455364|2020-03-02	1																						England/SHEF-C5D3D/2020|EPI_ISL_432810|2020-03-18	G70A		England/NORT-2964D4/2020|EPI_ISL_488038|2020-04-12	1
England/201121125/2020|EPI_ISL_464685|2020-03-09					hCoV-19/England/CAMB-1AFD29/2020|EPI_ISL_459203|2020-05-04	S68F		hCoV-19/Scotland/CVR2959/2020|EPI_ISL_473633|2020-04-22	1																						Netherlands/ZuidHolland_69/2020|EPI_ISL_422937|2020-03-24	G70T		Netherlands/Friesland_33/2020|EPI_ISL_460848|2020-04-14	1
England/201120459/2020|EPI_ISL_464676|2020-03-10					hCoV-19/England/CAMB-1B2AFF/2020|EPI_ISL_469907|2020-05-16	S68F		hCoV-19/England/LIVE-9C670/2020|EPI_ISL_449566|2020-03-23	1																						England/CAMB-7B45F/2020|EPI_ISL_433959|2020-04-11	G70A		Netherlands/NA_437/2020|EPI_ISL_455239|2020-04-08	1
England/201120178/2020|EPI_ISL_464667|2020-03-07					hCoV-19/Scotland/GCVR-17228A/2020|EPI_ISL_469993|2020-03-30	S68F		hCoV-19/England/LIVE-9C591/2020|EPI_ISL_449555|2020-03-23	1																						England/CAMB-71AC0/2020|EPI_ISL_439659|2020-03-31	G70A		Netherlands/NA_428/2020|EPI_ISL_455230|2020-04-06	1
England/201101368/2020|EPI_ISL_464659|2020-03-09					hCoV-19/Scotland/GCVR-171A92/2020|EPI_ISL_489530|2020-03-27	S68F		hCoV-19/England/CAMB-1B1313/2020|EPI_ISL_458570|2020-05-06	1																						England/CAMB-73E1D/2020|EPI_ISL_440330|2020-03-18	G70A		Wales/PHWC-168481/2020|EPI_ISL_494245|2020-04-19	1
England/201090791/2020|EPI_ISL_464605|2020-03-05					hCoV-19/Sweden/20-07860/2020|EPI_ISL_450821|2020-04-23	S68F		hCoV-19/England/CAMB-1B1DCA/2020|EPI_ISL_458552|2020-05-09	1																						England/CAMB-1ADB21/2020|EPI_ISL_448035|2020-05-01	G70A		Belgium/ULG-10253/2020|EPI_ISL_515060|2020-7-18	1
England/NORW-E73CA/2020|EPI_ISL_449032|2020-04-21					hCoV-19/USA/MI-MDHHS-SC20723/2020|EPI_ISL_471747|2020-04-20	S68F		hCoV-19/England/NORT-295B85/2020|EPI_ISL_488629|2020-04-03	1																						England/CAMB-1B0A2E/2020|EPI_ISL_452929|2020-05-12	G70A		India/IK42/2020|EPI_ISL_508370|2020-05-04	1
Scotland/EDB012/2020|EPI_ISL_415638|2020-03-07					hCoV-19/England/CAMB-1AED84/2020|EPI_ISL_452860|2020-05-09	S68F		hCoV-19/England/NORT-2978D7/2020|EPI_ISL_488023|2020-04-22	1																						England/CAMB-7815B/2020|EPI_ISL_441112|2020-03-31	G70C		Wales/PHWC-168ACB/2020|EPI_ISL_494326|2020-04-19	1
Scotland/CVR07/2020|EPI_ISL_415630|2020-03-09					hCoV-19/England/CAMB-1B0675/2020|EPI_ISL_452904|2020-05-09	S68F		hCoV-19/England/NORT-29CB06/2020|EPI_ISL_484291|2020-05-01	1																						England/SHEF-C4378/2020|EPI_ISL_441960|2020-04-11	G70A		USA/CA-IGI-0080/2020|EPI_ISL_511834|2020-06-11	1
England/201100211/2020|EPI_ISL_464646|2020-03-08					hCoV-19/England/20192020301/2020|EPI_ISL_465598|2020-05-04	S68F		hCoV-19/England/NORT-29265A/2020|EPI_ISL_489136|2020-05-12	1																						England/CAMB-1B03C9/2020|EPI_ISL_459284|2020-05-01	G70A		England/CAMB-7FDAB/2020|EPI_ISL_444413|2020-04-20	1
England/201100062/2020|EPI_ISL_464638|2020-03-06					hCoV-19/Sweden/20-50931/2020|EPI_ISL_475160|2020-04-20	S68F		hCoV-19/USA/LA-GBCL-26492460/2020|EPI_ISL_485037|2020-04-28	1																						England/CAMB-1AB938/2020|EPI_ISL_470160|2020-04-20	G70A		England/CAMB-7B12B/2020|EPI_ISL_433921|2020-04-11	1
England/201100038/2020|EPI_ISL_464628|2020-03-08					hCoV-19/Wuhan/HB-WH1-129/2020|EPI_ISL_455364|2020-03-02	S68C		hCoV-19/Australia/NSW291/2020|EPI_ISL_451555|2020-04-03	1																						England/SHEF-C8374/2020|EPI_ISL_432862|2020-03-23	G70A		Spain/COV001524/2020|EPI_ISL_467135|2020-03-19	1
England/201100013/2020|EPI_ISL_464620|2020-03-08					hCoV-19/Scotland/CVR2959/2020|EPI_ISL_473633|2020-04-22	S68F		hCoV-19/England/CAMB-1ADBC7/2020|EPI_ISL_448044|2020-05-04	1																						England/SHEF-C3494/2020|EPI_ISL_432773|2020-03-28	G70A		England/CAMB-1B046C/2020|EPI_ISL_459276|2020-05-01	1
England/201090974/2020|EPI_ISL_464611|2020-03-08					hCoV-19/England/LIVE-9C670/2020|EPI_ISL_449566|2020-03-23	S68F		hCoV-19/USA/NY-NYUMC783/2020|EPI_ISL_456020|2020-03-25	1																						England/CAMB-1B0402/2020|EPI_ISL_459318|2020-05-01	G70A		Scotland/CVR2840/2020|EPI_ISL_448196|2020-04-21	1
England/LIVE-99224/2020|EPI_ISL_439699|2020-04-08					hCoV-19/England/LIVE-9C591/2020|EPI_ISL_449555|2020-03-23	S68F		hCoV-19/England/20146021204/2020|EPI_ISL_466040|2020-03-31	1																						England/SHEF-C343A/2020|EPI_ISL_432770|2020-03-23	G70A		England/SHEF-D2B51/2020|EPI_ISL_442511|2020-04-12	1
England/LIVE-990EE/2020|EPI_ISL_439691|2020-04-07					hCoV-19/England/CAMB-1B1313/2020|EPI_ISL_458570|2020-05-06	S68F		hCoV-19/England/CAMB-1B1999/2020|EPI_ISL_452989|2020-05-14	1																						England/SHEF-C177F/2020|EPI_ISL_441911|2020-03-25	G70A		England/CAMB-1AEBB7/2020|EPI_ISL_448056|2020-05-01	1
England/LIVE-98FF1/2020|EPI_ISL_439682|2020-04-07					hCoV-19/England/CAMB-1B1DCA/2020|EPI_ISL_458552|2020-05-09	S68F		hCoV-19/England/CAMB-1B1911/2020|EPI_ISL_452981|2020-05-13	1																						England/SHEF-C07E9/2020|EPI_ISL_420160|2020-03-27	G70A		England/SHEF-C5D3D/2020|EPI_ISL_432810|2020-03-18	1
England/LIVE-98F2E/2020|EPI_ISL_439673|2020-04-07					hCoV-19/England/NORT-295B85/2020|EPI_ISL_488629|2020-04-03	S68F		hCoV-19/Scotland/CVR2917/2020|EPI_ISL_473630|2020-04-22	1																						England/SHEF-C8A06/2020|EPI_ISL_442034|2020-03-27	G70A		Netherlands/ZuidHolland_69/2020|EPI_ISL_422937|2020-03-24	1
Belgium/UGent-9/2020|EPI_ISL_425053|2020-03-25					hCoV-19/England/NORT-2978D7/2020|EPI_ISL_488023|2020-04-22	S68F		hCoV-19/Scotland/CVR2227/2020|EPI_ISL_448169|2020-04-12	1																						England/SHEF-C16FA/2020|EPI_ISL_441910|2020-03-28	G70A		England/CAMB-7B45F/2020|EPI_ISL_433959|2020-04-11	1
Wales/PHWC-163978/2020|EPI_ISL_474021|2020-05-11					hCoV-19/England/NORT-29CB06/2020|EPI_ISL_484291|2020-05-01	S68F		hCoV-19/England/LIVE-9B556/2020|EPI_ISL_449460|2020-04-02	1																						Spain/Zaragoza2468/2020|EPI_ISL_468766|2020-03-27	G70T		England/CAMB-71AC0/2020|EPI_ISL_439659|2020-03-31	1
Canada/BC_83109/2020|EPI_ISL_415588|2020-03-05					hCoV-19/England/NORT-29265A/2020|EPI_ISL_489136|2020-05-12	S68F		hCoV-19/England/LIVE-9C018/2020|EPI_ISL_449502|2020-03-23	1																						England/SHEF-C905E/2020|EPI_ISL_442039|2020-03-26	G70A		England/CAMB-73E1D/2020|EPI_ISL_440330|2020-03-18	1
Canada/BC_17397/2020|EPI_ISL_415580|2020-02-28					hCoV-19/USA/LA-GBCL-26492460/2020|EPI_ISL_485037|2020-04-28	S68F		hCoV-19/England/NORT-295851/2020|EPI_ISL_488516|2020-04-01	1																						England/SHEF-C129C/2020|EPI_ISL_441906|2020-04-02	G70A		England/CAMB-1ADB21/2020|EPI_ISL_448035|2020-05-01	1
England/201090486/2020|EPI_ISL_464571|2020-03-08					hCoV-19/Australia/NSW291/2020|EPI_ISL_451555|2020-04-03	S68F		hCoV-19/England/NORT-2979A7/2020|EPI_ISL_488052|2020-04-21	1																						Brazil/PE-IAM67/2020|EPI_ISL_500483|2020-04-08	G70T		England/CAMB-1B0A2E/2020|EPI_ISL_452929|2020-05-12	1
England/20109045404/2020|EPI_ISL_464563|2020-03-06					hCoV-19/England/CAMB-1ADBC7/2020|EPI_ISL_448044|2020-05-04	S68F		hCoV-19/England/NORT-29CADC/2020|EPI_ISL_484290|2020-04-30	1																						Brazil/PE-IAM356/2020|EPI_ISL_500875|2020-04-13	G70T		England/CAMB-7815B/2020|EPI_ISL_441112|2020-03-31	1
England/20109028804/2020|EPI_ISL_464549|2020-03-06					hCoV-19/USA/NY-NYUMC783/2020|EPI_ISL_456020|2020-03-25	S68F		hCoV-19/England/NORT-296F88/2020|EPI_ISL_484281|2020-04-28	1																						Wales/PHWC-15CE64/2020|EPI_ISL_472629|2020-05-02	T71C		England/SHEF-C4378/2020|EPI_ISL_441960|2020-04-11	1
England/20109009704/2020|EPI_ISL_464540|2020-03-05					hCoV-19/England/20146021204/2020|EPI_ISL_466040|2020-03-31	S68F		hCoV-19/England/CAMB-1AFDDE/2020|EPI_ISL_459189|2020-05-04	1																						Spain/COV003718/2020|EPI_ISL_467242|2020-04-03	T74C		England/CAMB-1B03C9/2020|EPI_ISL_459284|2020-05-01	1
England/20109003404/2020|EPI_ISL_464512|2020-03-06					hCoV-19/England/CAMB-1B1999/2020|EPI_ISL_452989|2020-05-14	S68F		hCoV-19/England/NORT-292669/2020|EPI_ISL_489097|2020-05-12	1																						Canada/NB_55/2020|EPI_ISL_482472|2020-03-15	T74C		England/CAMB-1AB938/2020|EPI_ISL_470160|2020-04-20	1
England/201090022/2020|EPI_ISL_464502|2020-03-03					hCoV-19/England/CAMB-1B1911/2020|EPI_ISL_452981|2020-05-13	S68F		hCoV-19/England/CAMB-1B2B38/2020|EPI_ISL_469905|2020-05-15	1																						England/201161554/2020|EPI_ISL_464858|2020-03-11	T74C		England/SHEF-C8374/2020|EPI_ISL_432862|2020-03-23	1
England/201161290/2020|EPI_ISL_464829|2020-03-10					hCoV-19/Scotland/CVR2917/2020|EPI_ISL_473630|2020-04-22	S68F		hCoV-19/Scotland/CVR2444/2020|EPI_ISL_477941|2020-04-14	1																						England/CAMB-7576B/2020|EPI_ISL_440468|2020-03-13	T74C		England/SHEF-C3494/2020|EPI_ISL_432773|2020-03-28	1
England/201161201/2020|EPI_ISL_464820|2020-03-11					hCoV-19/Scotland/CVR2227/2020|EPI_ISL_448169|2020-04-12	S68F		hCoV-19/Scotland/CVR2785/2020|EPI_ISL_473565|2020-04-20	1																						England/SHEF-C9DC0/2020|EPI_ISL_442349|2020-03-26	T74C		England/CAMB-1B0402/2020|EPI_ISL_459318|2020-05-01	1
England/201161142/2020|EPI_ISL_464812|2020-03-12					hCoV-19/England/LIVE-9B556/2020|EPI_ISL_449460|2020-04-02	S68F		hCoV-19/Scotland/GCVR-17233C/2020|EPI_ISL_469976|2020-03-29	1																						England/LOND-124D20C/2020|EPI_ISL_507068|2020-03-23	T74C		England/SHEF-C343A/2020|EPI_ISL_432770|2020-03-23	1
England/201090620/2020|EPI_ISL_464593|2020-03-04					hCoV-19/England/LIVE-9C018/2020|EPI_ISL_449502|2020-03-23	S68F		hCoV-19/England/LIVE-9A27E/2020|EPI_ISL_439862|2020-04-18	1																						England/20132001904/2020|EPI_ISL_423706|2020-03-23	A75T		England/SHEF-C177F/2020|EPI_ISL_441911|2020-03-25	1
England/20109053304/2020|EPI_ISL_464583|2020-03-07					hCoV-19/England/NORT-295851/2020|EPI_ISL_488516|2020-04-01	S68F		hCoV-19/England/LIVE-99FF0/2020|EPI_ISL_439836|2020-04-14	1																						England/20172000804/2020|EPI_ISL_465314|2020-04-19	A75T		England/SHEF-C07E9/2020|EPI_ISL_420160|2020-03-27	1
England/20109007604/2020|EPI_ISL_464530|2020-03-03					hCoV-19/England/NORT-2979A7/2020|EPI_ISL_488052|2020-04-21	S68F		hCoV-19/England/OXON-ACD87/2020|EPI_ISL_448535|2020-04-06	1																						Australia/NSW335/2020|EPI_ISL_451597|2020-04-08	A75G		England/SHEF-C8A06/2020|EPI_ISL_442034|2020-03-27	1
England/20109005904/2020|EPI_ISL_464520|2020-03-04					hCoV-19/England/NORT-29CADC/2020|EPI_ISL_484290|2020-04-30	S68F		hCoV-19/England/CAMB-1B00D1/2020|EPI_ISL_448108|2020-05-07	1																						England/GSTT-265E0BC/2020|EPI_ISL_484149|2020-03-30	A75T		England/SHEF-C16FA/2020|EPI_ISL_441910|2020-03-28	1
England/LIVE-9A40F/2020|EPI_ISL_440863|2020-04-16					hCoV-19/England/NORT-296F88/2020|EPI_ISL_484281|2020-04-28	S68F		hCoV-19/England/CAMB-1B001D/2020|EPI_ISL_448098|2020-05-06	1																						England/20139011304/2020|EPI_ISL_421875|2020-03-26	A75T		Spain/Zaragoza2468/2020|EPI_ISL_468766|2020-03-27	1
England/LIVE-9A29C/2020|EPI_ISL_440853|2020-04-18					hCoV-19/England/CAMB-1AFDDE/2020|EPI_ISL_459189|2020-05-04	S68F		hCoV-19/Wuhan/HB-WH4-202/2020|EPI_ISL_455388|2020-03-17	1																						England/20144075304/2020|EPI_ISL_466008|2020-04-01	A75T		England/SHEF-C905E/2020|EPI_ISL_442039|2020-03-26	1
England/LIVE-99D9C/2020|EPI_ISL_439818|2020-04-13					hCoV-19/England/NORT-292669/2020|EPI_ISL_489097|2020-05-12	S68F		hCoV-19/Scotland/CVR2173/2020|EPI_ISL_448151|2020-04-11	1																						India/CCMB_K600B/2020|EPI_ISL_447581|2020-04-14	A75G		England/SHEF-C129C/2020|EPI_ISL_441906|2020-04-02	1
England/LIVE-99C35/2020|EPI_ISL_439809|2020-04-12					hCoV-19/England/CAMB-1B2B38/2020|EPI_ISL_469905|2020-05-15	S68F		hCoV-19/Australia/VIC04/2020|EPI_ISL_416412|2020-03-02	1																						England/20131102804/2020|EPI_ISL_423688|2020-03-23	A75T		Brazil/PE-IAM67/2020|EPI_ISL_500483|2020-04-08	1
England/LIVE-99B47/2020|EPI_ISL_439801|2020-04-13					hCoV-19/Scotland/CVR2444/2020|EPI_ISL_477941|2020-04-14	S68F		hCoV-19/England/LIVE-9C82F/2020|EPI_ISL_449584|2020-03-21	1																						England/201340860/2020|EPI_ISL_423192|2020-03-25	A75T		Brazil/PE-IAM356/2020|EPI_ISL_500875|2020-04-13	1
England/CAMB-738E2/2020|EPI_ISL_425253|2020-03-29					hCoV-19/Scotland/CVR2785/2020|EPI_ISL_473565|2020-04-20	S68F		hCoV-19/England/LIVE-9A548/2020|EPI_ISL_449344|2020-03-25	1																						England/20134064204/2020|EPI_ISL_423151|2020-03-24	A75T		Wales/PHWC-15CE64/2020|EPI_ISL_472629|2020-05-02	1
England/201161480/2020|EPI_ISL_464848|2020-03-11					hCoV-19/Scotland/GCVR-17233C/2020|EPI_ISL_469976|2020-03-29	S68F		hCoV-19/Australia/VIC37/2020|EPI_ISL_419754|2020-03-11	1																						England/20129018904/2020|EPI_ISL_424007|2020-03-20	A75T		Spain/COV003718/2020|EPI_ISL_467242|2020-04-03	1
England/201161426/2020|EPI_ISL_464840|2020-03-11					hCoV-19/England/LIVE-9A27E/2020|EPI_ISL_439862|2020-04-18	S68F		hCoV-19/England/LIVE-9C7E6/2020|EPI_ISL_449580|2020-03-23	1																						England/CAMB-7D5D2/2020|EPI_ISL_441755|2020-04-06	A75T		Canada/NB_55/2020|EPI_ISL_482472|2020-03-15	1
England/201161311/2020|EPI_ISL_464831|2020-03-10					hCoV-19/England/LIVE-99FF0/2020|EPI_ISL_439836|2020-04-14	S68F		hCoV-19/Japan/Donner28/2020|EPI_ISL_438972|2020-03-27	1																						Bangladesh/BCSIR-NILMRC_177/2020|EPI_ISL_483624|2020-06-12	A75G		England/201161554/2020|EPI_ISL_464858|2020-03-11	1
England/201160760/2020|EPI_ISL_464804|2020-03-10					hCoV-19/England/OXON-ACD87/2020|EPI_ISL_448535|2020-04-06	S68F		hCoV-19/England/NORT-284C1D/2020|EPI_ISL_488715|2020-03-27	1																						England/20129018604/2020|EPI_ISL_424006|2020-03-20	A75T		England/CAMB-7576B/2020|EPI_ISL_440468|2020-03-13	1
England/LIVE-9B969/2020|EPI_ISL_440889|2020-04-17					hCoV-19/England/CAMB-1B00D1/2020|EPI_ISL_448108|2020-05-07	S68F		hCoV-19/England/NORT-29E16C/2020|EPI_ISL_488135|2020-05-05	1																						England/20131102904/2020|EPI_ISL_423689|2020-03-23	A75T		England/SHEF-C9DC0/2020|EPI_ISL_442349|2020-03-26	1
England/LIVE-9B87B/2020|EPI_ISL_440880|2020-04-22					hCoV-19/England/CAMB-1B001D/2020|EPI_ISL_448098|2020-05-06	S68F		hCoV-19/England/CAMB-1AFDFC/2020|EPI_ISL_459239|2020-05-04	1																						England/20129021604/2020|EPI_ISL_424013|2020-03-21	A75T		England/LOND-124D20C/2020|EPI_ISL_507068|2020-03-23	1
England/LIVE-9B714/2020|EPI_ISL_440872|2020-04-20					hCoV-19/Wuhan/HB-WH4-202/2020|EPI_ISL_455388|2020-03-17	S68C		hCoV-19/England/CAMB-1AFD92/2020|EPI_ISL_459198|2020-05-04	1																						Australia/NSW543/2020|EPI_ISL_455082|2020-03-31	A75G		England/20132001904/2020|EPI_ISL_423706|2020-03-23	1
England/LIVE-9A1DB/2020|EPI_ISL_439858|2020-04-16					hCoV-19/Scotland/CVR2173/2020|EPI_ISL_448151|2020-04-11	S68F		hCoV-19/Scotland/CVR2417/2020|EPI_ISL_477934|2020-04-14	1																						India/AR5/2020|EPI_ISL_508191|2020-06-01	A75G		England/20172000804/2020|EPI_ISL_465314|2020-04-19	1
England/LIVE-9A126/2020|EPI_ISL_439849|2020-04-17					hCoV-19/Australia/VIC04/2020|EPI_ISL_416412|2020-03-02	S68F		hCoV-19/Scotland/CVR2303/2020|EPI_ISL_477896|2020-04-12	1																						India/CCMB_M172/2020|EPI_ISL_495189|2020-06-06	A75T		Australia/NSW335/2020|EPI_ISL_451597|2020-04-08	1
England/LIVE-9A056/2020|EPI_ISL_439840|2020-04-17					hCoV-19/England/LIVE-9C82F/2020|EPI_ISL_449584|2020-03-21	S68F		hCoV-19/Japan/PG-0256/2020|EPI_ISL_479941|2020-03-21	1																						India/AR8/2020|EPI_ISL_508205|2020-05-29	A75G		England/GSTT-265E0BC/2020|EPI_ISL_484149|2020-03-30	1
England/LIVE-99F69/2020|EPI_ISL_439832|2020-04-14					hCoV-19/England/LIVE-9A548/2020|EPI_ISL_449344|2020-03-25	S68F		hCoV-19/Kenya/D5/2020|EPI_ISL_457999|2020-05-22	1																						USA/LA-SR0319/2020|EPI_ISL_450174|2020-04-04	T76C		England/20139011304/2020|EPI_ISL_421875|2020-03-26	1
England/CAMB-73A0A/2020|EPI_ISL_425266|2020-03-31					hCoV-19/Australia/VIC37/2020|EPI_ISL_419754|2020-03-11	S68F		hCoV-19/USA/TX-HMH0234/2020|EPI_ISL_434891|2020-03-24	1																						USA/LA-BIE-080/2020|EPI_ISL_436948|2020-04-06	T76C		England/20144075304/2020|EPI_ISL_466008|2020-04-01	1
England/CAMB-73888/2020|EPI_ISL_425248|2020-03-30					hCoV-19/England/LIVE-9C7E6/2020|EPI_ISL_449580|2020-03-23	S68F		hCoV-19/Israel/CVL-n-6140/2020|EPI_ISL_474981|2020-03-15	1																						Wales/PHWC-368EB/2020|EPI_ISL_474728|2020-04-28	T76C		India/CCMB_K600B/2020|EPI_ISL_447581|2020-04-14	1
England/CAMB-737D6/2020|EPI_ISL_425240|2020-03-31					hCoV-19/Japan/Donner28/2020|EPI_ISL_438972|2020-03-27	S68F		hCoV-19/England/CAMB-1B3EB6/2020|EPI_ISL_473451|2020-06-09	1																						USA/LA-BIE-046/2020|EPI_ISL_463294|2020-04-06	T76C		England/20131102804/2020|EPI_ISL_423688|2020-03-23	1
England/CAMB-7375E/2020|EPI_ISL_425232|2020-03-30					hCoV-19/England/NORT-284C1D/2020|EPI_ISL_488715|2020-03-27	S68F		hCoV-19/England/CAMB-1AED2A/2020|EPI_ISL_448076|2020-05-06	1																						USA/WA-S1197/2020|EPI_ISL_463687|2020-05-06	C78T		England/201340860/2020|EPI_ISL_423192|2020-03-25	1
England/201161691/2020|EPI_ISL_464872|2020-03-12					hCoV-19/England/NORT-29E16C/2020|EPI_ISL_488135|2020-05-05	S68F		hCoV-19/Wuhan/HB-WH2-146/2020|EPI_ISL_455370|2020-02-24	1																						USA/WA-S1180/2020|EPI_ISL_463670|2020-05-06	C78T		England/20134064204/2020|EPI_ISL_423151|2020-03-24	1
England/201161632/2020|EPI_ISL_464864|2020-03-12					hCoV-19/England/CAMB-1AFDFC/2020|EPI_ISL_459239|2020-05-04	S68F		hCoV-19/England/LIVE-9C8A7/2020|EPI_ISL_449590|2020-03-23	1																						USA/WA-S1154/2020|EPI_ISL_463644|2020-05-04	C78T		England/20129018904/2020|EPI_ISL_424007|2020-03-20	1
England/201161538/2020|EPI_ISL_464854|2020-03-11					hCoV-19/England/CAMB-1AFD92/2020|EPI_ISL_459198|2020-05-04	S68F		hCoV-19/England/LIVE-9B5CF/2020|EPI_ISL_449466|2020-03-25	1																						USA/WA-S1298/2020|EPI_ISL_495748|2020-05-15	C78T		England/CAMB-7D5D2/2020|EPI_ISL_441755|2020-04-06	1
Scotland/EDB4362/2020|EPI_ISL_449297|2020-04-25					hCoV-19/Scotland/CVR2417/2020|EPI_ISL_477934|2020-04-14	S68F		hCoV-19/England/LIVE-9B240/2020|EPI_ISL_449423|2020-03-27	1																						USA/WA-S1850/2020|EPI_ISL_496276|2020-05-27	C78T		Bangladesh/BCSIR-NILMRC_177/2020|EPI_ISL_483624|2020-06-12	1
Scotland/EDB4279/2020|EPI_ISL_449289|2020-04-20					hCoV-19/Scotland/CVR2303/2020|EPI_ISL_477896|2020-04-12	S68F		hCoV-19/England/LIVE-9C072/2020|EPI_ISL_449503|2020-03-25	1																						Spain/MD-006423/2020|EPI_ISL_510138|2020-04-11	C78G		England/20129018604/2020|EPI_ISL_424006|2020-03-20	1
Scotland/EDB4202/2020|EPI_ISL_449281|2020-04-21					hCoV-19/Japan/PG-0256/2020|EPI_ISL_479941|2020-03-21	S68F		hCoV-19/Russia/StPetersburg-RII7319V/2020|EPI_ISL_450249|2020-04-21	1																						USA/WA-S1336/2020|EPI_ISL_495786|2020-05-13	C78T		England/20131102904/2020|EPI_ISL_423689|2020-03-23	1
Scotland/EDB4016/2020|EPI_ISL_449273|2020-04-15					hCoV-19/Kenya/D5/2020|EPI_ISL_457999|2020-05-22	S68F		hCoV-19/India/InStem_NCBS_0086/2020|EPI_ISL_486835|2020	1																						DRC/1151/2020|EPI_ISL_447596|2020-04-05	T80C		England/20129021604/2020|EPI_ISL_424013|2020-03-21	1
England/LIVE-9BA1B/2020|EPI_ISL_440894|2020-04-19					hCoV-19/USA/TX-HMH0234/2020|EPI_ISL_434891|2020-03-24	S68F		hCoV-19/Japan/Donner17/2020|EPI_ISL_438961|2020-04-11	1																						England/CAMB-720EB/2020|EPI_ISL_439629|2020-03-28	G81T		Australia/NSW543/2020|EPI_ISL_455082|2020-03-31	1
England/CAMB-74474/2020|EPI_ISL_425293|2020-03-19					hCoV-19/Israel/CVL-n-6140/2020|EPI_ISL_474981|2020-03-15	S68Y		hCoV-19/England/CAMB-1B1E6D/2020|EPI_ISL_458528|2020-05-09	1																						England/CAMB-78D93/2020|EPI_ISL_441084|2020-04-03	G81T		India/AR5/2020|EPI_ISL_508191|2020-06-01	1
England/201180172/2020|EPI_ISL_464891|2020-03-10					hCoV-19/England/CAMB-1B3EB6/2020|EPI_ISL_473451|2020-06-09	S68F		hCoV-19/England/NORT-28258D/2020|EPI_ISL_488670|2020-03-26	1																						England/SHEF-CFDCA/2020|EPI_ISL_432600|2020-03-29	G81A		India/CCMB_M172/2020|EPI_ISL_495189|2020-06-06	1
England/201180107/2020|EPI_ISL_464883|2020-03-12					hCoV-19/England/CAMB-1AED2A/2020|EPI_ISL_448076|2020-05-06	S68F		hCoV-19/England/NORT-295A5B/2020|EPI_ISL_488598|2020-04-03	1																						USA/CruiseA-7/2020|EPI_ISL_413612|2020-02-17	C82T		India/AR8/2020|EPI_ISL_508205|2020-05-29	1
England/201180001/2020|EPI_ISL_464874|2020-03-12					hCoV-19/Wuhan/HB-WH2-146/2020|EPI_ISL_455370|2020-02-24	S68C		hCoV-19/England/NORT-297707/2020|EPI_ISL_488030|2020-04-22	1																						Hungary/UD-6858/2020|EPI_ISL_476071|2020-04-08	C82T		USA/LA-SR0319/2020|EPI_ISL_450174|2020-04-04	1
England/201140043/2020|EPI_ISL_464703|2020-03-11					hCoV-19/England/LIVE-9C8A7/2020|EPI_ISL_449590|2020-03-23	S68F		hCoV-19/England/CAMB-1AFCA4/2020|EPI_ISL_459238|2020-05-04	1																						USA/CruiseA-6/2020|EPI_ISL_413611|2020-02-21	C82T		USA/LA-BIE-080/2020|EPI_ISL_436948|2020-04-06	1
Scotland/EDB3965/2020|EPI_ISL_449262|2020-05-03					hCoV-19/England/LIVE-9B5CF/2020|EPI_ISL_449466|2020-03-25	S68F		hCoV-19/England/NORT-29260F/2020|EPI_ISL_489108|2020-05-12	1																						England/LIVE-A0363/2020|EPI_ISL_472104|2020-05-25	C82A		Wales/PHWC-368EB/2020|EPI_ISL_474728|2020-04-28	1
England/LIVE-99840/2020|EPI_ISL_439765|2020-04-09					hCoV-19/England/LIVE-9B240/2020|EPI_ISL_449423|2020-03-27	S68F		hCoV-19/Scotland/CVR475/2020|EPI_ISL_439081|2020-03-23	1																						Hungary/UD-6802/2020|EPI_ISL_477010|2020-04-07	C82T		USA/LA-BIE-046/2020|EPI_ISL_463294|2020-04-06	1
England/LIVE-99761/2020|EPI_ISL_439756|2020-04-10					hCoV-19/England/LIVE-9C072/2020|EPI_ISL_449503|2020-03-25	S68F		hCoV-19/Scotland/CVR2664/2020|EPI_ISL_478012|2020-04-17	1																						Hungary/UD-5394/2020|EPI_ISL_476069|2020-03-30	C82T		USA/WA-S1197/2020|EPI_ISL_463687|2020-05-06	1
England/LIVE-9927F/2020|EPI_ISL_439704|2020-04-07					hCoV-19/Russia/StPetersburg-RII7319V/2020|EPI_ISL_450249|2020-04-21	S68F		hCoV-19/Scotland/CVR2255/2020|EPI_ISL_477886|2020-04-12	1																						Shanghai/SH0107/2020|EPI_ISL_416397|2020-02-02	C82T		USA/WA-S1180/2020|EPI_ISL_463670|2020-05-06	1
England/CAMB-743E0/2020|EPI_ISL_425286|2020-03-20					hCoV-19/India/InStem_NCBS_0086/2020|EPI_ISL_486835|2020	S68F		hCoV-19/Scotland/CVR2778/2020|EPI_ISL_473560|2020-04-20	1																						USA/UT-01/2020|EPI_ISL_415539|2020-03-13	C82T		USA/WA-S1154/2020|EPI_ISL_463644|2020-05-04	1
England/CAMB-73AEC/2020|EPI_ISL_425278|2020-03-31					hCoV-19/Japan/Donner17/2020|EPI_ISL_438961|2020-04-11	S68F		hCoV-19/Japan/Donner20/2020|EPI_ISL_438964|2020-04-14	1																						Wuhan/HB-WH2-154/2020|EPI_ISL_455373|2020-02-28	T86C		USA/WA-S1298/2020|EPI_ISL_495748|2020-05-15	1
England/CAMB-73A46/2020|EPI_ISL_425270|2020-03-31					hCoV-19/England/CAMB-1B1E6D/2020|EPI_ISL_458528|2020-05-09	S68F		hCoV-19/Japan/PG-0286/2020|EPI_ISL_479965|2020-03-23	1																						Wales/PHWC-16517E/2020|EPI_ISL_479429|2020-05-26	T87C		USA/WA-S1850/2020|EPI_ISL_496276|2020-05-27	1
Germany/NRW-49/2020|EPI_ISL_425133|2020-03-10					hCoV-19/England/NORT-28258D/2020|EPI_ISL_488670|2020-03-26	S68F		hCoV-19/Sweden/20-06306/2020|EPI_ISL_434651|2020-03-23	1																						Wales/PHWC-164DE4/2020|EPI_ISL_479383|2020-05-22	T87C		Spain/MD-006423/2020|EPI_ISL_510138|2020-04-11	1
England/201160271/2020|EPI_ISL_464793|2020-03-12					hCoV-19/England/NORT-295A5B/2020|EPI_ISL_488598|2020-04-03	S68F		hCoV-19/Wuhan/HB-WH5-224/2020|EPI_ISL_454969|2020-03-16	1																						Wales/PHWC-1632E6/2020|EPI_ISL_473275|2020-05-29	T87C		USA/WA-S1336/2020|EPI_ISL_495786|2020-05-13	1
England/201160065/2020|EPI_ISL_464783|2020-03-10					hCoV-19/England/NORT-297707/2020|EPI_ISL_488030|2020-04-22	S68F		hCoV-19/USA/NY-NYUMC274/2020|EPI_ISL_428788|2020-04-06	1																						Wales/PHWC-16286D/2020|EPI_ISL_473130|2020-05-15	T87C		DRC/1151/2020|EPI_ISL_447596|2020-04-05	1
England/201160007/2020|EPI_ISL_464774|2020-03-11					hCoV-19/England/CAMB-1AFCA4/2020|EPI_ISL_459238|2020-05-04	S68F		hCoV-19/England/OXON-AC9ED/2020|EPI_ISL_448501|2020-04-07	1																						Wales/PHWC-15D513/2020|EPI_ISL_472732|2020-05-04	T87C		England/CAMB-720EB/2020|EPI_ISL_439629|2020-03-28	1
England/201140062/2020|EPI_ISL_464713|2020-03-11					hCoV-19/England/NORT-29260F/2020|EPI_ISL_489108|2020-05-12	S68F		hCoV-19/England/CAMB-1AFD1A/2020|EPI_ISL_452876|2020-05-13	1																						England/BRIS-1223C2/2020|EPI_ISL_440645|2020-04-04	A88G		England/CAMB-78D93/2020|EPI_ISL_441084|2020-04-03	1
England/LIVE-99A2C/2020|EPI_ISL_439788|2020-04-12					hCoV-19/Scotland/CVR475/2020|EPI_ISL_439081|2020-03-23	S68F		hCoV-19/Guangdong/2020XN4291-P0038/2020|EPI_ISL_413889|2020-01-30	1																						England/BRIS-12AF02/2020|EPI_ISL_458307|2020-05-01	A88G		England/SHEF-CFDCA/2020|EPI_ISL_432600|2020-03-29	1
England/LIVE-99998/2020|EPI_ISL_439780|2020-04-09					hCoV-19/Scotland/CVR2664/2020|EPI_ISL_478012|2020-04-17	S68F		hCoV-19/England/CAMB-1B0B58/2020|EPI_ISL_452944|2020-05-15	1																						England/BRIS-1285E4/2020|EPI_ISL_469731|2020-04-17	A88G		USA/CruiseA-7/2020|EPI_ISL_413612|2020-02-17	1
England/LIVE-998F5/2020|EPI_ISL_439772|2020-04-09					hCoV-19/Scotland/CVR2255/2020|EPI_ISL_477886|2020-04-12	S68F		hCoV-19/Wuhan/HB-WH1-144/2020|EPI_ISL_455368|2020-02-23	1																						England/BRIS-1223B3/2020|EPI_ISL_440795|2020-04-04	A88G		Hungary/UD-6858/2020|EPI_ISL_476071|2020-04-08	1
England/LIVE-99637/2020|EPI_ISL_439743|2020-04-09					hCoV-19/Scotland/CVR2778/2020|EPI_ISL_473560|2020-04-20	S68F		hCoV-19/England/LIVE-9A584/2020|EPI_ISL_449347|2020-03-26	1																						England/BRIS-1223D1/2020|EPI_ISL_440676|2020-04-04	A88G		USA/CruiseA-6/2020|EPI_ISL_413611|2020-02-21	1
England/LIVE-9953A/2020|EPI_ISL_439733|2020-04-08					hCoV-19/Japan/Donner20/2020|EPI_ISL_438964|2020-04-14	S68F		hCoV-19/Wales/PHWC-26B8B/2020|EPI_ISL_422213|2020-03-28	1																						England/BRIS-1223E0/2020|EPI_ISL_440758|2020-04-04	A88G		England/LIVE-A0363/2020|EPI_ISL_472104|2020-05-25	1
England/LIVE-9945B/2020|EPI_ISL_439725|2020-04-08					hCoV-19/Japan/PG-0286/2020|EPI_ISL_479965|2020-03-23	S68F		hCoV-19/Guangzhou/GZMU0042/2020|EPI_ISL_414688|2020-02-25	1																						England/BRIS-1223FF/2020|EPI_ISL_440802|2020-04-04	A88G		Hungary/UD-6802/2020|EPI_ISL_477010|2020-04-07	1
England/LIVE-993D6/2020|EPI_ISL_439717|2020-04-08					hCoV-19/Sweden/20-06306/2020|EPI_ISL_434651|2020-03-23	S68F		hCoV-19/England/LIVE-9BF0D/2020|EPI_ISL_449488|2020-03-25	1																						England/BRIS-185470D/2020|EPI_ISL_495101|2020-05-01	A88G		Hungary/UD-5394/2020|EPI_ISL_476069|2020-03-30	1
England/LIVE-992BB/2020|EPI_ISL_439708|2020-04-06					hCoV-19/Wuhan/HB-WH5-224/2020|EPI_ISL_454969|2020-03-16	S68C		hCoV-19/England/CAMB-1B1E03/2020|EPI_ISL_458546|2020-05-09	1																						Scotland/EDB5849/2020|EPI_ISL_487668|2020-04-28	C89T		Shanghai/SH0107/2020|EPI_ISL_416397|2020-02-02	1
Germany/NRW-41/2020|EPI_ISL_425125|2020-03-18					hCoV-19/USA/NY-NYUMC274/2020|EPI_ISL_428788|2020-04-06	S68F		hCoV-19/England/NORT-282AF7/2020|EPI_ISL_488555|2020-03-28	1																						Scotland/CVR2522/2020|EPI_ISL_490690|2020-04-15	C89T		USA/UT-01/2020|EPI_ISL_415539|2020-03-13	1
Wales/PHWC-163FC1/2020|EPI_ISL_474113|2020-05-09					hCoV-19/England/OXON-AC9ED/2020|EPI_ISL_448501|2020-04-07	S68F		hCoV-19/England/CAMB-1AFCC2/2020|EPI_ISL_459237|2020-05-04	1																						England/NORT-292238/2020|EPI_ISL_457319|2020-05-08	C89T		Wuhan/HB-WH2-154/2020|EPI_ISL_455373|2020-02-28	1
England/201141522/2020|EPI_ISL_464760|2020-03-10					hCoV-19/England/CAMB-1AFD1A/2020|EPI_ISL_452876|2020-05-13	S68F		hCoV-19/Scotland/CVR2533/2020|EPI_ISL_477963|2020-04-15	1																						Scotland/EDB5017/2020|EPI_ISL_453181|2020-05-15	C89T		Wales/PHWC-16517E/2020|EPI_ISL_479429|2020-05-26	1
England/201141362/2020|EPI_ISL_464752|2020-03-09					hCoV-19/Guangdong/2020XN4291-P0038/2020|EPI_ISL_413889|2020-01-30	S68C		hCoV-19/Scotland/GCVR-173ABE/2020|EPI_ISL_459128|2020-04-07	1																						Spain/Albacete-COV003879/2020|EPI_ISL_474824|2020-05-20	C89T		Wales/PHWC-164DE4/2020|EPI_ISL_479383|2020-05-22	1
England/201141169/2020|EPI_ISL_464744|2020-03-09					hCoV-19/England/CAMB-1B0B58/2020|EPI_ISL_452944|2020-05-15	S68F		hCoV-19/Scotland/CVR2234/2020|EPI_ISL_477877|2020-04-12	1																						England/BRIS-1266A7/2020|EPI_ISL_458913|2020-04-08	C89T		Wales/PHWC-1632E6/2020|EPI_ISL_473275|2020-05-29	1
England/201140508/2020|EPI_ISL_464736|2020-03-11					hCoV-19/Wuhan/HB-WH1-144/2020|EPI_ISL_455368|2020-02-23	S68C		hCoV-19/Japan/Donner18/2020|EPI_ISL_438962|2020-04-13	1																						England/BIRM-611CE/2020|EPI_ISL_473439|2020-06-02	C89T		Wales/PHWC-16286D/2020|EPI_ISL_473130|2020-05-15	1
USA/LA-SR0319/2020|EPI_ISL_450174|2020-04-04					hCoV-19/England/LIVE-9A584/2020|EPI_ISL_449347|2020-03-26	S68F		hCoV-19/Scotland/CVR3857/2020|EPI_ISL_484660|2020-06-08	1																						Sichuan/SC-PHCC2-044/2020|EPI_ISL_451364|2020-02-12	C89T		Wales/PHWC-15D513/2020|EPI_ISL_472732|2020-05-04	1
England/NORW-E8217/2020|EPI_ISL_449125|2020-04-08					hCoV-19/Wales/PHWC-26B8B/2020|EPI_ISL_422213|2020-03-28	S68Y		hCoV-19/Scotland/GCVR-1718C5/2020|EPI_ISL_489695|2020-03-28	1																						England/BRIS-127187/2020|EPI_ISL_469580|2020-04-24	C89T		England/BRIS-1223C2/2020|EPI_ISL_440645|2020-04-04	1
England/LIVE-99A95/2020|EPI_ISL_439792|2020-04-12					hCoV-19/Guangzhou/GZMU0042/2020|EPI_ISL_414688|2020-02-25	S68C		hCoV-19/Scotland/CVR3069/2020|EPI_ISL_461653|2020-04-24	1																						Netherlands/Zeeland_18/2020|EPI_ISL_461256|2020-04-03	C89T		England/BRIS-12AF02/2020|EPI_ISL_458307|2020-05-01	1
Wales/PHWC-1641AC/2020|EPI_ISL_474139|2020-05-01					hCoV-19/England/LIVE-9BF0D/2020|EPI_ISL_449488|2020-03-25	S68F		hCoV-19/Guangzhou/GZMU0050/2020|EPI_ISL_429095|2020-02-08	1																						England/20144035204/2020|EPI_ISL_421944|2020-03-31	C89T		England/BRIS-1285E4/2020|EPI_ISL_469731|2020-04-17	1
England/201141549/2020|EPI_ISL_464764|2020-03-09					hCoV-19/England/CAMB-1B1E03/2020|EPI_ISL_458546|2020-05-09	S68F		hCoV-19/England/LIVE-99109/2020|EPI_ISL_439692|2020-04-06	1																						England/NORW-EB4D2/2020|EPI_ISL_457437|2020-05-01	C89T		England/BRIS-1223B3/2020|EPI_ISL_440795|2020-04-04	1
England/20096051004/2020|EPI_ISL_464187|2020-02-26					hCoV-19/England/NORT-282AF7/2020|EPI_ISL_488555|2020-03-28	S68F		hCoV-19/England/LIVE-99B56/2020|EPI_ISL_439802|2020-04-11	1																						England/NORT-291FF6/2020|EPI_ISL_489065|2020-05-07	C89T		England/BRIS-1223D1/2020|EPI_ISL_440676|2020-04-04	1
USA/CA-SR0347/2020|EPI_ISL_450191|2020-03-23					hCoV-19/England/CAMB-1AFCC2/2020|EPI_ISL_459237|2020-05-04	S68F		hCoV-19/England/CAMB-781A6/2020|EPI_ISL_433703|2020-04-04	1																						England/CAMB-1B2D7E/2020|EPI_ISL_456723|2020-05-19	C89T		England/BRIS-1223E0/2020|EPI_ISL_440758|2020-04-04	1
USA/LA-SR0330/2020|EPI_ISL_450183|2020-04-04					hCoV-19/Scotland/CVR2533/2020|EPI_ISL_477963|2020-04-15	S68F		hCoV-19/England/CAMB-1B2BCF/2020|EPI_ISL_456709|2020-05-19	1																						Saudi_Arabia/KAUST-Jeddah76/2020|EPI_ISL_437760|2020-04-01	C89T		England/BRIS-1223FF/2020|EPI_ISL_440802|2020-04-04	1
England/OXON-AFB7B/2020|EPI_ISL_478809|2020-04-16					hCoV-19/Scotland/GCVR-173ABE/2020|EPI_ISL_459128|2020-04-07	S68F		hCoV-19/England/20190142001/2020|EPI_ISL_465593|2020-05-04	1																						England/LIVE-A065B/2020|EPI_ISL_472124|2020-05-27	C89T		England/BRIS-185470D/2020|EPI_ISL_495101|2020-05-01	1
England/20099066104/2020|EPI_ISL_464208|2020-02-27					hCoV-19/Scotland/CVR2234/2020|EPI_ISL_477877|2020-04-12	S68F		hCoV-19/Sweden/20-50936/2020|EPI_ISL_475163|2020-04-21	1																						Shanghai/SH0045/2020|EPI_ISL_416354|2020-02-04	C89T		Scotland/EDB5849/2020|EPI_ISL_487668|2020-04-28	1
England/20099000304/2020|EPI_ISL_464199|2020-02-28					hCoV-19/Japan/Donner18/2020|EPI_ISL_438962|2020-04-13	S68F		hCoV-19/Sweden/20-50673/2020|EPI_ISL_475155|2020-04-06	1																						England/OXON-B0087/2020|EPI_ISL_478851|2020-04-26	C89T		Scotland/CVR2522/2020|EPI_ISL_490690|2020-04-15	1
Sweden/20-50227/2020|EPI_ISL_454893|2020-03-07					hCoV-19/Scotland/CVR3857/2020|EPI_ISL_484660|2020-06-08	S68F		hCoV-19/Wuhan/HB-WH1-139/2020|EPI_ISL_455367|2020-02-23	1																						USA/LA-BIE-028/2020|EPI_ISL_468717|2020-04-04	C89T		England/NORT-292238/2020|EPI_ISL_457319|2020-05-08	1
Sweden/20-50147/2020|EPI_ISL_454885|2020-03-04					hCoV-19/Scotland/GCVR-1718C5/2020|EPI_ISL_489695|2020-03-28	S68F		hCoV-19/England/LIVE-9A654/2020|EPI_ISL_449357|2020-03-29	1																						Saudi_Arabia/KAUST-Jeddah75/2020|EPI_ISL_437759|2020-04-01	C89T		Scotland/EDB5017/2020|EPI_ISL_453181|2020-05-15	1
Sweden/20-50098/2020|EPI_ISL_454877|2020-03-04					hCoV-19/Scotland/CVR3069/2020|EPI_ISL_461653|2020-04-24	S68F		hCoV-19/England/LIVE-9A4E1/2020|EPI_ISL_449339|2020-03-25	1																						England/NORW-EBD5F/2020|EPI_ISL_457505|2020-05-06	C89T		Spain/Albacete-COV003879/2020|EPI_ISL_474824|2020-05-20	1
Sweden/20-50053/2020|EPI_ISL_454869|2020-03-02					hCoV-19/Guangzhou/GZMU0050/2020|EPI_ISL_429095|2020-02-08	S68C		hCoV-19/Wuhan/HB-WHCM2-282/2020|EPI_ISL_455013|2020-02-24	1																						England/BRIS-12A2BE/2020|EPI_ISL_458303|2020-04-15	C89T		England/BRIS-1266A7/2020|EPI_ISL_458913|2020-04-08	1
India/THSTI-BAL_47/2020|EPI_ISL_454861|2020-04-07					hCoV-19/England/LIVE-99109/2020|EPI_ISL_439692|2020-04-06	S68F		hCoV-19/England/LIVE-9C8F2/2020|EPI_ISL_449595|2020-03-24	1																						Hungary/SRC-00417/2020|EPI_ISL_435409|2020-03-25	C89T		England/BIRM-611CE/2020|EPI_ISL_473439|2020-06-02	1
Scotland/EDB3450/2020|EPI_ISL_439265|2020-04-10					hCoV-19/England/LIVE-99B56/2020|EPI_ISL_439802|2020-04-11	S68F		hCoV-19/Japan/Donner38/2020|EPI_ISL_469296|2020-04-15	1																						England/BRIS-12DB92/2020|EPI_ISL_481813|2020-06-01	C89T		England/BRIS-127187/2020|EPI_ISL_469580|2020-04-24	1
Scotland/EDB2670/2020|EPI_ISL_439257|2020-04-26					hCoV-19/England/CAMB-781A6/2020|EPI_ISL_433703|2020-04-04	S68F		hCoV-19/England/CAMB-1B16DE/2020|EPI_ISL_458574|2020-05-09	1																						USA/WA-S1551/2020|EPI_ISL_495977|2020-05-26	C89T		Netherlands/Zeeland_18/2020|EPI_ISL_461256|2020-04-03	1
Scotland/EDB2650/2020|EPI_ISL_439249|2020-04-26					hCoV-19/England/CAMB-1B2BCF/2020|EPI_ISL_456709|2020-05-19	S68F		hCoV-19/England/NORT-294C29/2020|EPI_ISL_488596|2020-03-28	1																						England/BRIS-13270F/2020|EPI_ISL_492188|2020-06-10	C89T		England/20144035204/2020|EPI_ISL_421944|2020-03-31	1
Scotland/EDB2608/2020|EPI_ISL_439241|2020-04-25					hCoV-19/England/20190142001/2020|EPI_ISL_465593|2020-05-04	S68F		hCoV-19/England/NORT-296771/2020|EPI_ISL_488048|2020-04-25	1																						USA/WA-S1473/2020|EPI_ISL_495648|2020-05-12	C89T		England/NORW-EB4D2/2020|EPI_ISL_457437|2020-05-01	1
Scotland/EDB2579/2020|EPI_ISL_439233|2020-04-24					hCoV-19/Sweden/20-50936/2020|EPI_ISL_475163|2020-04-21	S68F		hCoV-19/England/NORT-296CBE/2020|EPI_ISL_484277|2020-04-28	1																						Russia/StPetersburg-RII3524VR4/2020|EPI_ISL_507291|2020-03-15	C89T		England/CAMB-1B2D7E/2020|EPI_ISL_456723|2020-05-19	1
Philippines/RITM-06/2020|EPI_ISL_430844|2020-03-22					hCoV-19/Sweden/20-50673/2020|EPI_ISL_475155|2020-04-06	S68F		hCoV-19/England/CAMB-1AFDB0/2020|EPI_ISL_459170|2020-05-04	1																						England/BRIS-1326F3/2020|EPI_ISL_511962|2020-06-11	C89T		Saudi_Arabia/KAUST-Jeddah76/2020|EPI_ISL_437760|2020-04-01	1
USA/WI-GMF-01047/2020|EPI_ISL_429845|2020-04-14					hCoV-19/Wuhan/HB-WH1-139/2020|EPI_ISL_455367|2020-02-23	S68C		hCoV-19/England/NORT-29DD4B/2020|EPI_ISL_484316|2020-05-07	1																						USA/OR-OHSU-1313/2020|EPI_ISL_509180|2020-07-14	A90G		Shanghai/SH0045/2020|EPI_ISL_416354|2020-02-04	1
England/OXON-B049A/2020|EPI_ISL_478882|2020-04-20					hCoV-19/England/LIVE-9A654/2020|EPI_ISL_449357|2020-03-29	S68F		hCoV-19/Scotland/CVR134/2020|EPI_ISL_425677|2020-03-16	1																						USA/OR-OHSU-1309/2020|EPI_ISL_509179|2020-07-14	A90G		England/OXON-B0087/2020|EPI_ISL_478851|2020-04-26	1
England/OXON-B0069/2020|EPI_ISL_478849|2020					hCoV-19/England/LIVE-9A4E1/2020|EPI_ISL_449339|2020-03-25	S68F		hCoV-19/England/LOND-D6531/2020|EPI_ISL_487550|2020-04-22	1																						England/LOND-D88CD/2020|EPI_ISL_492747|2020-04-23	C91A		USA/LA-BIE-028/2020|EPI_ISL_468717|2020-04-04	1
England/OXON-AFEAF/2020|EPI_ISL_478833|2020					hCoV-19/Wuhan/HB-WHCM2-282/2020|EPI_ISL_455013|2020-02-24	S68C		hCoV-19/England/BRIS-12D8B9/2020|EPI_ISL_481912|2020-05-06	1																						Scotland/CVR3660/2020|EPI_ISL_478087|2020-05-22	T92C		Saudi_Arabia/KAUST-Jeddah75/2020|EPI_ISL_437759|2020-04-01	1
England/201021554/2020|EPI_ISL_464293|2020-03-03					hCoV-19/England/LIVE-9C8F2/2020|EPI_ISL_449595|2020-03-24	S68F		hCoV-19/Scotland/CVR2534/2020|EPI_ISL_477964|2020-04-15	1																						England/BRIS-12D9B6/2020|EPI_ISL_481928|2020-05-07	C95T		England/NORW-EBD5F/2020|EPI_ISL_457505|2020-05-06	1
England/20102005204/2020|EPI_ISL_464282|2020-03-02					hCoV-19/Japan/Donner38/2020|EPI_ISL_469296|2020-04-15	S68F		hCoV-19/India/DRDE_4022/2020|EPI_ISL_476890|2020-05-16	1																						Luxembourg/LNS6264620/2020|EPI_ISL_429731|2020-03-31	C96T		England/BRIS-12A2BE/2020|EPI_ISL_458303|2020-04-15	1
England/20102003704/2020|EPI_ISL_464274|2020-03-01					hCoV-19/England/CAMB-1B16DE/2020|EPI_ISL_458574|2020-05-09	S68F		hCoV-19/India/AR21/2020|EPI_ISL_508169|2020-05-21	1																						England/SHEF-C088C/2020|EPI_ISL_420174|2020-03-21	C96T		Hungary/SRC-00417/2020|EPI_ISL_435409|2020-03-25	1
England/20102001304/2020|EPI_ISL_464266|2020-03-02					hCoV-19/England/NORT-294C29/2020|EPI_ISL_488596|2020-03-28	S68F		hCoV-19/Sweden/20-51849/2020|EPI_ISL_510855|2020-06-01	1																						Belgium/ULG-10095/2020|EPI_ISL_424651|2020-03-22	C96T		England/BRIS-12DB92/2020|EPI_ISL_481813|2020-06-01	1
England/20100010404/2020|EPI_ISL_464257|2020-03-01					hCoV-19/England/NORT-296771/2020|EPI_ISL_488048|2020-04-25	S68F		hCoV-19/Sweden/20-50934/2020|EPI_ISL_510819|2020-04-21	1																						Belgium/ULG-10089/2020|EPI_ISL_424643|2020-04-04	C96T		USA/WA-S1551/2020|EPI_ISL_495977|2020-05-26	1
Scotland/EDB2488/2020|EPI_ISL_439222|2020-04-23					hCoV-19/England/NORT-296CBE/2020|EPI_ISL_484277|2020-04-28	S68F		hCoV-19/Sweden/20-08910/2020|EPI_ISL_510816|2020-05-28	1																						England/SHEF-C3090/2020|EPI_ISL_432760|2020-03-22	C96T		England/BRIS-13270F/2020|EPI_ISL_492188|2020-06-10	1
Scotland/EDB2462/2020|EPI_ISL_439214|2020-04-23					hCoV-19/England/CAMB-1AFDB0/2020|EPI_ISL_459170|2020-05-04	S68F		hCoV-19/Sweden/20-52079/2020|EPI_ISL_510876|2020-06-15	1																						England/SHEF-C4949/2020|EPI_ISL_441965|2020-04-03	C96T		USA/WA-S1473/2020|EPI_ISL_495648|2020-05-12	1
Scotland/EDB2432/2020|EPI_ISL_439206|2020-04-23					hCoV-19/England/NORT-29DD4B/2020|EPI_ISL_484316|2020-05-07	S68F		hCoV-19/India/GA30/2020|EPI_ISL_511931|2020-06-17	1																						Australia/VIC872/2020|EPI_ISL_427127|2020-04-05	C96T		Russia/StPetersburg-RII3524VR4/2020|EPI_ISL_507291|2020-03-15	1
Sweden/20-50231/2020|EPI_ISL_430863|2020-03-09					hCoV-19/Scotland/CVR134/2020|EPI_ISL_425677|2020-03-16	S68F		hCoV-19/England/LIVE-A56ED/2020|EPI_ISL_500142|2020-03-20	1																						England/SHEF-CE1DE/2020|EPI_ISL_448887|2020-04-17	C96T		England/BRIS-1326F3/2020|EPI_ISL_511962|2020-06-11	1
Sweden/20-08172/2020|EPI_ISL_430855|2020-03-12					hCoV-19/England/LOND-D6531/2020|EPI_ISL_487550|2020-04-22	S68F		hCoV-19/England/LIVE-A68D7/2020|EPI_ISL_499520|2020-03-19	1																						Belgium/rega-0423303/2020|EPI_ISL_462157|2020-04-23	C96T		USA/OR-OHSU-1313/2020|EPI_ISL_509180|2020-07-14	1
USA/CA-SCCPHD-UC34/2020|EPI_ISL_429879|2020-03-05					hCoV-19/England/BRIS-12D8B9/2020|EPI_ISL_481912|2020-05-06	S68F		hCoV-19/Portugal/PT0772/2020|EPI_ISL_511031|2020-05-17	1																						England/PORT-2CFF0E/2020|EPI_ISL_475248|2020-03-23	C96T		USA/OR-OHSU-1309/2020|EPI_ISL_509179|2020-07-14	1
England/OXON-B00D2/2020|EPI_ISL_478854|2020-04-18					hCoV-19/Scotland/CVR2534/2020|EPI_ISL_477964|2020-04-15	S68F		hCoV-19/Sweden/20-51853/2020|EPI_ISL_510857|2020-06-01	1																						USA/OR-PROV-089/2020|EPI_ISL_482360|2020-04-20	C96T		England/LOND-D88CD/2020|EPI_ISL_492747|2020-04-23	1
England/20100007104/2020|EPI_ISL_464254|2020-02-29					hCoV-19/India/DRDE_4022/2020|EPI_ISL_476890|2020-05-16	S68F		hCoV-19/Sweden/20-51848/2020|EPI_ISL_510854|2020-06-01	1																						England/CAMB-82E84/2020|EPI_ISL_443327|2020-04-14	C96T		Scotland/CVR3660/2020|EPI_ISL_478087|2020-05-22	1
England/20100004204/2020|EPI_ISL_464246|2020-03-01					hCoV-19/India/AR21/2020|EPI_ISL_508169|2020-05-21	S68F		hCoV-19/India/S73/2020|EPI_ISL_508463|2020-05-26	1																						England/SHEF-D14DF/2020|EPI_ISL_442489|2020-04-11	C96T		England/BRIS-12D9B6/2020|EPI_ISL_481928|2020-05-07	1
England/20100000904/2020|EPI_ISL_464238|2020-03-01					hCoV-19/Sweden/20-51849/2020|EPI_ISL_510855|2020-06-01	S68F		hCoV-19/India/AR15/2020|EPI_ISL_508162|2020-05-24	1																						Belgium/rega-0423301/2020|EPI_ISL_462155|2020-04-23	C96T		Luxembourg/LNS6264620/2020|EPI_ISL_429731|2020-03-31	1
England/20099095204/2020|EPI_ISL_464230|2020-03-01					hCoV-19/Sweden/20-50934/2020|EPI_ISL_510819|2020-04-21	S68F		hCoV-19/India/S92/2020|EPI_ISL_508481|2020-05-25	1																						Belgium/rega-0423302/2020|EPI_ISL_462156|2020-04-23	C96T		England/SHEF-C088C/2020|EPI_ISL_420174|2020-03-21	1
England/20099072104/2020|EPI_ISL_464222|2020-03-01					hCoV-19/Sweden/20-08910/2020|EPI_ISL_510816|2020-05-28	S68F		hCoV-19/England/LIVE-A55B3/2020|EPI_ISL_500129|2020-03-20	1																						England/CAMB-1AB8A4/2020|EPI_ISL_470154|2020-04-21	C96T		Belgium/ULG-10095/2020|EPI_ISL_424651|2020-03-22	1
England/20099069004/2020|EPI_ISL_464214|2020-02-29					hCoV-19/Sweden/20-52079/2020|EPI_ISL_510876|2020-06-15	S68F		hCoV-19/England/LIVE-A6497/2020|EPI_ISL_499712|2020-03-18	1																						Sichuan/SC-PHCC2-044/2020|EPI_ISL_451364|2020-02-12	C96T		Belgium/ULG-10089/2020|EPI_ISL_424643|2020-04-04	1
Sweden/20-50288/2020|EPI_ISL_454899|2020-03-10					hCoV-19/India/GA30/2020|EPI_ISL_511931|2020-06-17	S68F		hCoV-19/England/LIVE-A60B1/2020|EPI_ISL_499682|2020-03-21	1																						England/BRIS-123640/2020|EPI_ISL_442776|2020-04-06	C96T		England/SHEF-C3090/2020|EPI_ISL_432760|2020-03-22	1
Scotland/EDB3594/2020|EPI_ISL_439295|2020-04-27					hCoV-19/England/LIVE-A56ED/2020|EPI_ISL_500142|2020-03-20	S68F		hCoV-19/USA/UT-03831/2020|EPI_ISL_509597|2020-04-01	1																						Belgium/rega-0423300/2020|EPI_ISL_462154|2020-04-23	C96T		England/SHEF-C4949/2020|EPI_ISL_441965|2020-04-03	1
Scotland/EDB3566/2020|EPI_ISL_439287|2020-04-14					hCoV-19/England/LIVE-A68D7/2020|EPI_ISL_499520|2020-03-19	S68F		hCoV-19/England/LIVE-A69E3/2020|EPI_ISL_499762|2020-03-16	1																						USA/WA-UW-4776/2020|EPI_ISL_486099|2020-03-27	C96T		Australia/VIC872/2020|EPI_ISL_427127|2020-04-05	1
Scotland/EDB3530/2020|EPI_ISL_439279|2020-04-13					hCoV-19/Portugal/PT0772/2020|EPI_ISL_511031|2020-05-17	S68F		hCoV-19/England/NORT-29CDA6/2020|EPI_ISL_499792|2020-05-01	1																						England/SHEF-C053A/2020|EPI_ISL_420235|2020-03-23	C96T		England/SHEF-CE1DE/2020|EPI_ISL_448887|2020-04-17	1
Scotland/EDB3498/2020|EPI_ISL_439271|2020-04-13					hCoV-19/Sweden/20-51853/2020|EPI_ISL_510857|2020-06-01	S68F		hCoV-19/Panama/334658/2020|EPI_ISL_496791|2020-03-31	1																						England/SHEF-CCEE8/2020|EPI_ISL_462061|2020-04-18	C96T		Belgium/rega-0423303/2020|EPI_ISL_462157|2020-04-23	1
Scotland/EDB1014/2020|EPI_ISL_439144|2020-04-07					hCoV-19/Sweden/20-51848/2020|EPI_ISL_510854|2020-06-01	S68F		hCoV-19/Sweden/20-51894/2020|EPI_ISL_510859|2020-05-25	1																						Belgium/rega-0423299/2020|EPI_ISL_462153|2020-04-23	C96T		England/PORT-2CFF0E/2020|EPI_ISL_475248|2020-03-23	1
Australia/VIC1283/2020|EPI_ISL_430710|2020-04-08					hCoV-19/India/S73/2020|EPI_ISL_508463|2020-05-26	S68F		hCoV-19/Sweden/20-51852/2020|EPI_ISL_510856|2020-06-01	1																						Belgium/ULG-10146/2020|EPI_ISL_447138|2020-04-17	C96T		USA/OR-PROV-089/2020|EPI_ISL_482360|2020-04-20	1
Australia/VIC1284/2020|EPI_ISL_430701|2020-04-09					hCoV-19/India/AR15/2020|EPI_ISL_508162|2020-05-24	S68F		hCoV-19/Sweden/20-51847/2020|EPI_ISL_510853|2020-06-01	1																						England/SHEF-C3968/2020|EPI_ISL_457601|2020-04-02	C96T		England/CAMB-82E84/2020|EPI_ISL_443327|2020-04-14	1
England/OXON-AF759/2020|EPI_ISL_478768|2020-04-15					hCoV-19/India/S92/2020|EPI_ISL_508481|2020-05-25	S68F		hCoV-19/Sweden/20-51278/2020|EPI_ISL_510823|2020-05-05	1																						Belgium/ULG-10088/2020|EPI_ISL_424646|2020-04-04	C96T		England/SHEF-D14DF/2020|EPI_ISL_442489|2020-04-11	1
England/20084031204/2020|EPI_ISL_464178|2020-02-18					hCoV-19/England/LIVE-A55B3/2020|EPI_ISL_500129|2020-03-20	S68F		hCoV-19/India/S70/2020|EPI_ISL_508460|2020-05-25	1																						England/SHEF-C9883/2020|EPI_ISL_432471|2020-03-23	C96T		Belgium/rega-0423301/2020|EPI_ISL_462155|2020-04-23	1
England/20072030304/2020|EPI_ISL_464168|2020-02-09					hCoV-19/England/LIVE-A6497/2020|EPI_ISL_499712|2020-03-18	S68F		hCoV-19/India/AR58/2020|EPI_ISL_508194|2020-05-21	1																						Belgium/rega-0423298/2020|EPI_ISL_462152|2020-04-23	C96T		Belgium/rega-0423302/2020|EPI_ISL_462156|2020-04-23	1
USA/UT-02016/2020|EPI_ISL_454729|2020-04-16					hCoV-19/England/LIVE-A60B1/2020|EPI_ISL_499682|2020-03-21	S68F		hCoV-19/England/LIVE-A5647/2020|EPI_ISL_500135|2020-03-20	1																						Belgium/ULG-10145/2020|EPI_ISL_447137|2020-04-19	C96T		England/CAMB-1AB8A4/2020|EPI_ISL_470154|2020-04-21	1
Scotland/EDB2382/2020|EPI_ISL_439196|2020-04-22					hCoV-19/USA/UT-03831/2020|EPI_ISL_509597|2020-04-01	S68F		hCoV-19/USA/WA-S2684/2020|EPI_ISL_497316|2020-06-22	1																						Belgium/ULG-0184/2020|EPI_ISL_447127|2020-03-23	C96T		England/BRIS-123640/2020|EPI_ISL_442776|2020-04-06	1
England/20102000506/2020|EPI_ISL_415147|2020-03-01					hCoV-19/England/LIVE-A69E3/2020|EPI_ISL_499762|2020-03-16	S68F		hCoV-19/England/LIVE-A5568/2020|EPI_ISL_500126|2020-03-21	1																						Timor-Leste/TL18/2020|EPI_ISL_456608|2020-04-12	C96T		Belgium/rega-0423300/2020|EPI_ISL_462154|2020-04-23	1
England/20100077906/2020|EPI_ISL_415139|2020-03-01					hCoV-19/England/NORT-29CDA6/2020|EPI_ISL_499792|2020-05-01	S68F		hCoV-19/England/LIVE-A587E/2020|EPI_ISL_499641|2020-03-20	1																						Switzerland/GE2453/2020|EPI_ISL_429219|2020-04-03	C96T		USA/WA-UW-4776/2020|EPI_ISL_486099|2020-03-27	1
England/20099107406/2020|EPI_ISL_415131|2020-02-29					hCoV-19/Panama/334658/2020|EPI_ISL_496791|2020-03-31	S68Y		hCoV-19/Switzerland/200066_619_C03/2020|EPI_ISL_510747|2020-07-15	1																						England/SHEF-C02F7/2020|EPI_ISL_420222|2020-03-29	C96T		England/SHEF-C053A/2020|EPI_ISL_420235|2020-03-23	1
England/OXON-AF9DB/2020|EPI_ISL_478792|2020-04-14					hCoV-19/Sweden/20-51894/2020|EPI_ISL_510859|2020-05-25	S68F		hCoV-19/USA/MI-MDHHS-SC21150/2020|EPI_ISL_507926|2020-03-26	1																						England/SHEF-C04F1/2020|EPI_ISL_420269|2020-03-23	C96T		England/SHEF-CCEE8/2020|EPI_ISL_462061|2020-04-18	1
England/20079000204/2020|EPI_ISL_464171|2020-02-14					hCoV-19/Sweden/20-51852/2020|EPI_ISL_510856|2020-06-01	S68F		hCoV-19/England/NORT-29E20F/2020|EPI_ISL_493509|2020-05-04	1																						Belgium/rega-0423297/2020|EPI_ISL_462151|2020-04-23	C96T		Belgium/rega-0423299/2020|EPI_ISL_462153|2020-04-23	1
Scotland/EDB2339/2020|EPI_ISL_439184|2020-04-22					hCoV-19/Sweden/20-51847/2020|EPI_ISL_510853|2020-06-01	S68F		hCoV-19/England/NORT-29E3FD/2020|EPI_ISL_493516|2020-04-30	1																						Switzerland/100008/2020|EPI_ISL_466933|2020-03-04	C96T		Belgium/ULG-10146/2020|EPI_ISL_447138|2020-04-17	1
Scotland/EDB2244/2020|EPI_ISL_439176|2020-04-21					hCoV-19/Sweden/20-51278/2020|EPI_ISL_510823|2020-05-05	S68F		hCoV-19/England/NORT-29C7E4/2020|EPI_ISL_499788|2020-04-22	1																						Wales/PHWC-160AA5/2020|EPI_ISL_473009|2020-04-18	C96T		England/SHEF-C3968/2020|EPI_ISL_457601|2020-04-02	1
Scotland/EDB2141/2020|EPI_ISL_439168|2020-04-20					hCoV-19/India/S70/2020|EPI_ISL_508460|2020-05-25	S68F		hCoV-19/England/CAMB-1B0693/2020|EPI_ISL_452906|2020-05-07	1																						Switzerland/GE0304/2020|EPI_ISL_429218|2020-04-02	C96T		Belgium/ULG-10088/2020|EPI_ISL_424646|2020-04-04	1
Scotland/EDB2125/2020|EPI_ISL_439160|2020-04-17					hCoV-19/India/AR58/2020|EPI_ISL_508194|2020-05-21	S68F		hCoV-19/Wales/PHWC-165958/2020|EPI_ISL_490744|2020-05-15	1																						England/SHEF-C0691/2020|EPI_ISL_420231|2020-03-25	C96T		England/SHEF-C9883/2020|EPI_ISL_432471|2020-03-23	1
Scotland/EDB2101/2020|EPI_ISL_439152|2020-04-19					hCoV-19/England/LIVE-A5647/2020|EPI_ISL_500135|2020-03-20	S68F		hCoV-19/England/CAMB-1B1841/2020|EPI_ISL_458554|2020-05-10	1																						England/SHEF-CE684/2020|EPI_ISL_442443|2020-04-04	C96T		Belgium/rega-0423298/2020|EPI_ISL_462152|2020-04-23	1
England/201080053/2020|EPI_ISL_464444|2020-03-06					hCoV-19/USA/WA-S2684/2020|EPI_ISL_497316|2020-06-22	S68F		hCoV-19/Scotland/CVR3657/2020|EPI_ISL_478086|2020-05-21	1																						England/SHEF-C2B45/2020|EPI_ISL_432750|2020-04-02	C96T		Belgium/ULG-10145/2020|EPI_ISL_447137|2020-04-19	1
England/201080034/2020|EPI_ISL_464436|2020-03-06					hCoV-19/England/LIVE-A5568/2020|EPI_ISL_500126|2020-03-21	S68F		hCoV-19/Wales/PHWC-1655DC/2020|EPI_ISL_484685|2020-06-26	1																						Belgium/ULG-10169/2020|EPI_ISL_447139|2020-04-17	C96T		Belgium/ULG-0184/2020|EPI_ISL_447127|2020-03-23	1
England/201080017/2020|EPI_ISL_464427|2020-03-05					hCoV-19/England/LIVE-A587E/2020|EPI_ISL_499641|2020-03-20	S68F		hCoV-19/Senegal/382/2020|EPI_ISL_420073|2020-03-19	1																						Belgium/ULG-10096/2020|EPI_ISL_427389|2020-04-05	C96T		Timor-Leste/TL18/2020|EPI_ISL_456608|2020-04-12	1
England/201061457/2020|EPI_ISL_464415|2020-03-01					hCoV-19/Switzerland/200066_619_C03/2020|EPI_ISL_510747|2020-07-15	S68F		hCoV-19/Wales/PHWC-1649E0/2020|EPI_ISL_479333|2020-06-11	1																						England/PORT-2D221E/2020|EPI_ISL_499303|2020-03-22	C96T		Switzerland/GE2453/2020|EPI_ISL_429219|2020-04-03	1
England/201060323/2020|EPI_ISL_464402|2020-03-04					hCoV-19/USA/MI-MDHHS-SC21150/2020|EPI_ISL_507926|2020-03-26	S68F		hCoV-19/Wales/PHWC-1659EF/2020|EPI_ISL_490751|2020-06-18	1																						England/PORT-2D209C/2020|EPI_ISL_512412|2020-03-21	C96T		England/SHEF-C02F7/2020|EPI_ISL_420222|2020-03-29	1
England/CAMB-757A7/2020|EPI_ISL_440458|2020-03-12					hCoV-19/England/NORT-29E20F/2020|EPI_ISL_493509|2020-05-04	S68F		hCoV-19/England/CAMB-1B1C27/2020|EPI_ISL_458562|2020-05-07	1																						England/PORT-2D2463/2020|EPI_ISL_507144|2020-03-25	C96T		England/SHEF-C04F1/2020|EPI_ISL_420269|2020-03-23	1
England/CAMB-757B6/2020|EPI_ISL_440446|2020-03-12					hCoV-19/England/NORT-29E3FD/2020|EPI_ISL_493516|2020-04-30	S68F		hCoV-19/Wales/PHWC-162B37/2020|EPI_ISL_473166|2020-05-27	1																						England/PORT-2D23FD/2020|EPI_ISL_507141|2020-03-24	C96T		Belgium/rega-0423297/2020|EPI_ISL_462151|2020-04-23	1
England/201090013/2020|EPI_ISL_464494|2020-03-03					hCoV-19/England/NORT-29C7E4/2020|EPI_ISL_499788|2020-04-22	S68F		hCoV-19/England/CAMB-1B0718/2020|EPI_ISL_452914|2020-05-07	1																						South_Africa/KRISP-K001359/2020|EPI_ISL_515844|2020-07-16	C96T		Switzerland/100008/2020|EPI_ISL_466933|2020-03-04	1
England/20108152604/2020|EPI_ISL_464486|2020-03-03					hCoV-19/England/CAMB-1B0693/2020|EPI_ISL_452906|2020-05-07	R69I		hCoV-19/England/20169030304/2020|EPI_ISL_465225|2020-04-15	1																						England/PORT-2D20E7/2020|EPI_ISL_514486|2020-03-21	C96T		Wales/PHWC-160AA5/2020|EPI_ISL_473009|2020-04-18	1
England/20108118204/2020|EPI_ISL_464478|2020-03-04					hCoV-19/Wales/PHWC-165958/2020|EPI_ISL_490744|2020-05-15	R69I		hCoV-19/Wales/PHWC-162C70/2020|EPI_ISL_473183|2020-05-27	1																						England/PORT-2D1534/2020|EPI_ISL_512400|2020-04-01	C96T		Switzerland/GE0304/2020|EPI_ISL_429218|2020-04-02	1
England/201080106/2020|EPI_ISL_464469|2020-03-04					hCoV-19/England/CAMB-1B1841/2020|EPI_ISL_458554|2020-05-10	R69I		hCoV-19/Scotland/CVR3502/2020|EPI_ISL_456887|2020-05-10	1																						England/PORT-2D4003/2020|EPI_ISL_507159|2020	C96T		England/SHEF-C0691/2020|EPI_ISL_420231|2020-03-25	1
England/201080078/2020|EPI_ISL_464461|2020-03-03					hCoV-19/Scotland/CVR3657/2020|EPI_ISL_478086|2020-05-21	R69K		hCoV-19/Switzerland/101142/2020|EPI_ISL_451809|2020-03-31	1																						England/PORT-2D225A/2020|EPI_ISL_507137|2020-03-23	C96T		England/SHEF-CE684/2020|EPI_ISL_442443|2020-04-04	1
England/201061056/2020|EPI_ISL_464407|2020-03-04					hCoV-19/Wales/PHWC-1655DC/2020|EPI_ISL_484685|2020-06-26	R69I		hCoV-19/Wales/PHWC-165FFC/2020|EPI_ISL_490825|2020-06-12	1																						Portugal/PT1185/2020|EPI_ISL_511730|2020-03-25	C96T		England/SHEF-C2B45/2020|EPI_ISL_432750|2020-04-02	1
Wuhan/HB-WH1-130/2020|EPI_ISL_454909|2020-03-02					hCoV-19/Senegal/382/2020|EPI_ISL_420073|2020-03-19	R69I		hCoV-19/Wales/PHWC-165ACE/2020|EPI_ISL_490763|2020-06-27	1																						England/PORT-2D1F09/2020|EPI_ISL_499295|2020-04-06	C96T		Belgium/ULG-10169/2020|EPI_ISL_447139|2020-04-17	1
Sweden/20-50293/2020|EPI_ISL_454901|2020-03-10					hCoV-19/Wales/PHWC-1649E0/2020|EPI_ISL_479333|2020-06-11	R69I		hCoV-19/Fujian/IM3520004T/2020|EPI_ISL_431292|2020-03-18	1																						England/PORT-2D1D5A/2020|EPI_ISL_499275|2020-04-03	C96T		Belgium/ULG-10096/2020|EPI_ISL_427389|2020-04-05	1
Scotland/EDB3645/2020|EPI_ISL_439303|2020-04-27					hCoV-19/Wales/PHWC-1659EF/2020|EPI_ISL_490751|2020-06-18	R69I		hCoV-19/England/CAMB-1B1CCD/2020|EPI_ISL_458551|2020-05-07	1																						England/PORT-2D1428/2020|EPI_ISL_512386|2020-03-17	C96T		England/PORT-2D221E/2020|EPI_ISL_499303|2020-03-22	1
England/OXON-B08DA/2020|EPI_ISL_478917|2020-04-21					hCoV-19/England/CAMB-1B1C27/2020|EPI_ISL_458562|2020-05-07	R69I		hCoV-19/England/CAMB-1B1CBE/2020|EPI_ISL_458541|2020-05-10	1																						England/PORT-2D2296/2020|EPI_ISL_507139|2020-03-23	C96T		England/PORT-2D209C/2020|EPI_ISL_512412|2020-03-21	1
England/20104014004/2020|EPI_ISL_464330|2020-03-02					hCoV-19/Wales/PHWC-162B37/2020|EPI_ISL_473166|2020-05-27	R69I		hCoV-19/England/CAMB-1B1C45/2020|EPI_ISL_458522|2020-05-07	1																						Spain/AN-003966/2020|EPI_ISL_500182|2020-04-11	C96T		England/PORT-2D2463/2020|EPI_ISL_507144|2020-03-25	1
England/201040077/2020|EPI_ISL_464321|2020-03-02					hCoV-19/England/CAMB-1B0718/2020|EPI_ISL_452914|2020-05-07	R69I		hCoV-19/Scotland/CVR3501/2020|EPI_ISL_456886|2020-05-10	1																						Panama/334835/2020|EPI_ISL_496794|2020-03-31	C96T		England/PORT-2D23FD/2020|EPI_ISL_507141|2020-03-24	1
England/20104004302/2020|EPI_ISL_464313|2020-03-02					hCoV-19/England/20169030304/2020|EPI_ISL_465225|2020-04-15	R69I		hCoV-19/Belgium/rega-0503483/2020|EPI_ISL_476999|2020-05-03	1																						Iran/IRVSH-01/2020|EPI_ISL_507007|2020-05-01	T98C		South_Africa/KRISP-K001359/2020|EPI_ISL_515844|2020-07-16	1
England/201040024/2020|EPI_ISL_464304|2020-02-03					hCoV-19/Wales/PHWC-162C70/2020|EPI_ISL_473183|2020-05-27	R69I		hCoV-19/Wales/PHWC-164DA8/2020|EPI_ISL_479380|2020-05-25	1																						England/EXET-13572A/2020|EPI_ISL_478275|2020-04-07	C99T		England/PORT-2D20E7/2020|EPI_ISL_514486|2020-03-21	1
Wuhan/HB-WHCM-113/2020|EPI_ISL_454993|2020-02-28					hCoV-19/Scotland/CVR3502/2020|EPI_ISL_456887|2020-05-10	R69K		hCoV-19/Australia/WA21/2020|EPI_ISL_470839|2020-04-28	1																						Wuhan/HB-WHCM-111/2020|EPI_ISL_455404|2020-03-02	C100T		England/PORT-2D1534/2020|EPI_ISL_512400|2020-04-01	1
Wuhan/HB-WH6-242/2020|EPI_ISL_454982|2020-03-14					hCoV-19/Switzerland/101142/2020|EPI_ISL_451809|2020-03-31	R69I		hCoV-19/Scotland/CVR3500/2020|EPI_ISL_456885|2020-05-10	1																						Netherlands/Gelderland_39/2020|EPI_ISL_460939|2020-04-22	C107T		England/PORT-2D4003/2020|EPI_ISL_507159|2020	1
Wuhan/HB-WH5-231/2020|EPI_ISL_454974|2020-02-17					hCoV-19/Wales/PHWC-165FFC/2020|EPI_ISL_490825|2020-06-12	R69I		hCoV-19/Wales/PHWC-1655FA/2020|EPI_ISL_484687|2020-06-27	1																						USA/VA-DCLS-0056/2020|EPI_ISL_426464|2020-04-01	C107T		England/PORT-2D225A/2020|EPI_ISL_507137|2020-03-23	1
Wuhan/HB-WH2-148/2020|EPI_ISL_454920|2020-02-21					hCoV-19/Wales/PHWC-165ACE/2020|EPI_ISL_490763|2020-06-27	R69I		hCoV-19/Wales/PHWC-160E4F/2020|EPI_ISL_473058|2020-05-17	1																						England/OXON-B0CCF/2020|EPI_ISL_478953|2020-04-27	G108T		Portugal/PT1185/2020|EPI_ISL_511730|2020-03-25	1
Scotland/EDB3914/2020|EPI_ISL_439365|2020-05-01					hCoV-19/Fujian/IM3520004T/2020|EPI_ISL_431292|2020-03-18	R69I		hCoV-19/Wales/PHWC-16096C/2020|EPI_ISL_472998|2020-05-23	1																						Netherlands/NA_79/2020|EPI_ISL_422839|2020-03-10	C109T		England/PORT-2D1F09/2020|EPI_ISL_499295|2020-04-06	1
Scotland/EDB3892/2020|EPI_ISL_439357|2020-05-01					hCoV-19/England/CAMB-1B1CCD/2020|EPI_ISL_458551|2020-05-07	R69I		hCoV-19/Wales/PHWC-15E59A/2020|EPI_ISL_472821|2020-05-15	1																						England/NOTT-111C70/2020|EPI_ISL_472391|2020-06-03	C109T		England/PORT-2D1D5A/2020|EPI_ISL_499275|2020-04-03	1
Scotland/EDB3775/2020|EPI_ISL_439320|2020-04-29					hCoV-19/England/CAMB-1B1CBE/2020|EPI_ISL_458541|2020-05-10	R69I		hCoV-19/England/CAMB-1B1BC0/2020|EPI_ISL_458548|2020-05-07	1																						USA/WI-WSLH-200066/2020|EPI_ISL_471231|2020-04-15	C109T		England/PORT-2D1428/2020|EPI_ISL_512386|2020-03-17	1
England/OXON-B0FF3/2020|EPI_ISL_478986|2020-04-12					hCoV-19/England/CAMB-1B1C45/2020|EPI_ISL_458522|2020-05-07	R69I		hCoV-19/England/NORT-29C9DF/2020|EPI_ISL_488166|2020-04-30	1																						England/BIRM-5FE53/2020|EPI_ISL_461529|2020	T110A		England/PORT-2D2296/2020|EPI_ISL_507139|2020-03-23	1
England/OXON-B0BA4/2020|EPI_ISL_478941|2020					hCoV-19/Scotland/CVR3501/2020|EPI_ISL_456886|2020-05-10	R69K		hCoV-19/Scotland/CVR3499/2020|EPI_ISL_456884|2020-05-10	1																						South_Korea/SNU01/2020|EPI_ISL_411929|2020-01	T110A		Spain/AN-003966/2020|EPI_ISL_500182|2020-04-11	1
England/201060066/2020|EPI_ISL_464392|2020-03-04					hCoV-19/Belgium/rega-0503483/2020|EPI_ISL_476999|2020-05-03	R69K		hCoV-19/Belgium/rega-0502481/2020|EPI_ISL_476997|2020-05-02	1																						USA/WA-UW306/2020|EPI_ISL_418874|2020-03-16	T110G		Panama/334835/2020|EPI_ISL_496794|2020-03-31	1
England/201060047/2020|EPI_ISL_464381|2020-03-04					hCoV-19/Wales/PHWC-164DA8/2020|EPI_ISL_479380|2020-05-25	R69I		hCoV-19/Scotland/CVR3890/2020|EPI_ISL_484675|2020-06-15	1																						Japan/PG-0269/2020|EPI_ISL_479952|2020-03	T111G		England/EXET-13572A/2020|EPI_ISL_478275|2020-04-07	1
Wuhan/HB-WH5-222/2020|EPI_ISL_454967|2020-03-20					hCoV-19/Australia/WA21/2020|EPI_ISL_470839|2020-04-28	R69I		hCoV-19/Wales/PHWC-165633/2020|EPI_ISL_484691|2020-06-27	1																						Iran/IRVSH-01/2020|EPI_ISL_507007|2020-05-01	T111A		Wuhan/HB-WHCM-111/2020|EPI_ISL_455404|2020-03-02	1
Wuhan/HB-WH4-206/2020|EPI_ISL_454956|2020-03-27					hCoV-19/Scotland/CVR3500/2020|EPI_ISL_456885|2020-05-10	R69K		hCoV-19/Wales/PHWC-16029E/2020|EPI_ISL_472914|2020-05-17	1																						England/HECH-259A1FE/2020|EPI_ISL_488860|2020-05-24	A114G		Netherlands/Gelderland_39/2020|EPI_ISL_460939|2020-04-22	1
Wuhan/HB-WH4-194/2020|EPI_ISL_454948|2020-03-24					hCoV-19/Wales/PHWC-1655FA/2020|EPI_ISL_484687|2020-06-27	R69I		hCoV-19/England/CAMB-1B06B1/2020|EPI_ISL_452908|2020	1																						Romania/ROSV_2899/2020|EPI_ISL_491063|2020-04-17	A114G		USA/VA-DCLS-0056/2020|EPI_ISL_426464|2020-04-01	1
Wuhan/HB-WH3-170/2020|EPI_ISL_454936|2020-02-11					hCoV-19/Wales/PHWC-160E4F/2020|EPI_ISL_473058|2020-05-17	R69I		hCoV-19/England/CAMB-1B06DF/2020|EPI_ISL_452910|2020-05-07	1																						England/HECH-259A0D3/2020|EPI_ISL_488852|2020-05-19	A114G		England/OXON-B0CCF/2020|EPI_ISL_478953|2020-04-27	1
Scotland/EDB3870/2020|EPI_ISL_439348|2020-04-30					hCoV-19/Wales/PHWC-16096C/2020|EPI_ISL_472998|2020-05-23	R69I		hCoV-19/Wales/PHWC-15E8CE/2020|EPI_ISL_472841|2020-05-14	1																						England/HECH-259A1EF/2020|EPI_ISL_488868|2020-05-25	A114G		Netherlands/NA_79/2020|EPI_ISL_422839|2020-03-10	1
Scotland/EDB3856/2020|EPI_ISL_439340|2020-04-30					hCoV-19/Wales/PHWC-15E59A/2020|EPI_ISL_472821|2020-05-15	R69I		hCoV-19/Wales/PHWC-164C7E/2020|EPI_ISL_479365|2020-06-11	1																						England/HECH-259A2FB/2020|EPI_ISL_488859|2020-06-04	A114G		England/NOTT-111C70/2020|EPI_ISL_472391|2020-06-03	1
Scotland/EDB3817/2020|EPI_ISL_439332|2020-04-29					hCoV-19/England/CAMB-1B1BC0/2020|EPI_ISL_458548|2020-05-07	R69I		hCoV-19/England/CAMB-1B1C90/2020|EPI_ISL_458536|2020-05-10	1																						England/HECH-259A0B5/2020|EPI_ISL_488851|2020-05-19	A114G		USA/WI-WSLH-200066/2020|EPI_ISL_471231|2020-04-15	1
Scotland/EDB3790/2020|EPI_ISL_439324|2020-04-29					hCoV-19/England/NORT-29C9DF/2020|EPI_ISL_488166|2020-04-30	R69I		hCoV-19/Wales/PHWC-165615/2020|EPI_ISL_484689|2020-06-28	1																						England/HECH-259A2BF/2020|EPI_ISL_488866|2020-06-02	A114G		England/BIRM-5FE53/2020|EPI_ISL_461529|2020	1
Scotland/EDB3740/2020|EPI_ISL_439315|2020-04-28					hCoV-19/Scotland/CVR3499/2020|EPI_ISL_456884|2020-05-10	R69K		hCoV-19/England/CAMB-1B0745/2020|EPI_ISL_452917|2020-05-07	1																						Greece/43_35679/2020|EPI_ISL_437874|2020-03-20	T115A		South_Korea/SNU01/2020|EPI_ISL_411929|2020-01	1
Spain/Albacete-COV003775/2020|EPI_ISL_474808|2020-04-03					hCoV-19/Belgium/rega-0502481/2020|EPI_ISL_476997|2020-05-02	R69K		hCoV-19/Finland/2A10SVIIC/2020|EPI_ISL_481650|2020-04-02	1																						England/BRIS-12F4D1/2020|EPI_ISL_488265|2020-04-13	G121T		USA/WA-UW306/2020|EPI_ISL_418874|2020-03-16	1
England/201060041/2020|EPI_ISL_464377|2020-03-05					hCoV-19/Scotland/CVR3890/2020|EPI_ISL_484675|2020-06-15	R69K		hCoV-19/Wales/PHWC-165B70/2020|EPI_ISL_490772|2020-06-12	1																						England/BRIS-12F26E/2020|EPI_ISL_488372|2020-04-13	G121T		Japan/PG-0269/2020|EPI_ISL_479952|2020-03	1
England/201060025/2020|EPI_ISL_464368|2020-03-02					hCoV-19/Wales/PHWC-165633/2020|EPI_ISL_484691|2020-06-27	R69I		hCoV-19/England/CAMB-1B188D/2020|EPI_ISL_458565|2020-05-07	1																						USA/WA-S296/2020|EPI_ISL_430150|2020-03-13	G121T		England/HECH-259A1FE/2020|EPI_ISL_488860|2020-05-24	1
England/201060010/2020|EPI_ISL_464359|2020-03-04					hCoV-19/Wales/PHWC-16029E/2020|EPI_ISL_472914|2020-05-17	R69I		hCoV-19/England/CAMB-1B1CAF/2020|EPI_ISL_458555|2020-05-07	1																						England/BRIS-12D87D/2020|EPI_ISL_481951|2020-05-06	G121T		Romania/ROSV_2899/2020|EPI_ISL_491063|2020-04-17	1
England/201041494/2020|EPI_ISL_464351|2020-03-04					hCoV-19/England/CAMB-1B06B1/2020|EPI_ISL_452908|2020	R69I		hCoV-19/Belgium/rega-0414478/2020|EPI_ISL_476988|2020-04-14	1																						England/TBSD-2488E57/2020|EPI_ISL_482059|2020-04-28	G121T		England/HECH-259A0D3/2020|EPI_ISL_488852|2020-05-19	1
England/201040706/2020|EPI_ISL_464343|2020-03-04					hCoV-19/England/CAMB-1B06DF/2020|EPI_ISL_452910|2020-05-07	R69I		hCoV-19/Wales/PHWC-165606/2020|EPI_ISL_484688|2020-06-27	1																						Wales/PHWC-2BB77/2020|EPI_ISL_445814|2020-03-28	G121T		England/HECH-259A1EF/2020|EPI_ISL_488868|2020-05-25	1
England/201040154/2020|EPI_ISL_464335|2020-03-01					hCoV-19/Wales/PHWC-15E8CE/2020|EPI_ISL_472841|2020-05-14	R69I		hCoV-19/Wales/PHWC-16683C/2020|EPI_ISL_494047|2020-06-27	1																						England/BRIS-12F4E0/2020|EPI_ISL_488309|2020-04-13	G121T		England/HECH-259A2FB/2020|EPI_ISL_488859|2020-06-04	1
Sweden/20-51044/2020|EPI_ISL_450831|2020-04-27					hCoV-19/Wales/PHWC-164C7E/2020|EPI_ISL_479365|2020-06-11	R69I		hCoV-19/Wales/PHWC-166F64/2020|EPI_ISL_494133|2020-06-27	1																						Wales/PHWC-25515/2020|EPI_ISL_421001|2020-03-23	G121T		England/HECH-259A0B5/2020|EPI_ISL_488851|2020-05-19	1
Sweden/20-07919/2020|EPI_ISL_450823|2020-04-24					hCoV-19/England/CAMB-1B1C90/2020|EPI_ISL_458536|2020-05-10	R69I		hCoV-19/Wales/PHWC-166C8B/2020|EPI_ISL_494099|2020-06-27	1																						England/BRIS-130859/2020|EPI_ISL_492595|2020-04-12	G121T		England/HECH-259A2BF/2020|EPI_ISL_488866|2020-06-02	1
Sweden/20-07737/2020|EPI_ISL_450815|2020-04-23					hCoV-19/Wales/PHWC-165615/2020|EPI_ISL_484689|2020-06-28	R69I		hCoV-19/Wales/PHWC-168973/2020|EPI_ISL_494310|2020-05-28	1																						Malaysia/3998/2020|EPI_ISL_501210|2020-04-01	G121T		Greece/43_35679/2020|EPI_ISL_437874|2020-03-20	1
USA/WA-S696/2020|EPI_ISL_449866|2020-04-09					hCoV-19/England/CAMB-1B0745/2020|EPI_ISL_452917|2020-05-07	R69I		hCoV-19/Wales/PHWC-166B8E/2020|EPI_ISL_494088|2020-06-27	1																						Mali/M002659/2020|EPI_ISL_487451|2020-04-09	C122T		England/BRIS-12F4D1/2020|EPI_ISL_488265|2020-04-13	1
USA/WA-S688/2020|EPI_ISL_449858|2020-04-08					hCoV-19/Finland/2A10SVIIC/2020|EPI_ISL_481650|2020-04-02	R69I		hCoV-19/Wales/PHWC-16691B/2020|EPI_ISL_494060|2020-06-27	1																						England/NOTT-112583/2020|EPI_ISL_484396|2020-04-27	C122T		England/BRIS-12F26E/2020|EPI_ISL_488372|2020-04-13	1
USA/WA-S680/2020|EPI_ISL_449850|2020-04-08					hCoV-19/Wales/PHWC-165B70/2020|EPI_ISL_490772|2020-06-12	R69I		hCoV-19/Wales/PHWC-1668E1/2020|EPI_ISL_494057|2020-06-27	1																						England/BRIS-12DF96/2020|EPI_ISL_482019|2020-04-19	C122T		USA/WA-S296/2020|EPI_ISL_430150|2020-03-13	1
USA/WA-S672/2020|EPI_ISL_449842|2020-04-08					hCoV-19/England/CAMB-1B188D/2020|EPI_ISL_458565|2020-05-07	R69I		hCoV-19/Wales/PHWC-16676C/2020|EPI_ISL_494036|2020-06-27	1																						USA/WA-S1158/2020|EPI_ISL_463648|2020-05-04	C122T		England/BRIS-12D87D/2020|EPI_ISL_481951|2020-05-06	1
USA/UT-01583/2020|EPI_ISL_449828|2020-04-07					hCoV-19/England/CAMB-1B1CAF/2020|EPI_ISL_458555|2020-05-07	R69I		hCoV-19/Wales/PHWC-1665CC/2020|EPI_ISL_494020|2020-06-27	1																						England/BRIS-123C3F/2020|EPI_ISL_442779|2020-04-07	C122T		England/TBSD-2488E57/2020|EPI_ISL_482059|2020-04-28	1
Scotland/EDB106/2020|EPI_ISL_425894|2020-03-22					hCoV-19/Belgium/rega-0414478/2020|EPI_ISL_476988|2020-04-14	R69K		hCoV-19/Wales/PHWC-166E58/2020|EPI_ISL_494121|2020-06-27	1																						USA/WA-S1409/2020|EPI_ISL_495859|2020-05-19	C122T		Wales/PHWC-2BB77/2020|EPI_ISL_445814|2020-03-28	1
Scotland/EDB096/2020|EPI_ISL_425886|2020-03-21					hCoV-19/Wales/PHWC-165606/2020|EPI_ISL_484688|2020-06-27	R69I		hCoV-19/Wales/PHWC-166D2E/2020|EPI_ISL_494106|2020-06-27	1																						USA/WA-UW-10381/2020|EPI_ISL_501088|2020-06-04	C122T		England/BRIS-12F4E0/2020|EPI_ISL_488309|2020-04-13	1
Scotland/EDB086/2020|EPI_ISL_425878|2020-03-21					hCoV-19/Wales/PHWC-16683C/2020|EPI_ISL_494047|2020-06-27	R69I		hCoV-19/Wales/PHWC-1663A4/2020|EPI_ISL_493990|2020-06-27	1																						Morocco/RA85/2020|EPI_ISL_467299|2020-05-21	G123A		Wales/PHWC-25515/2020|EPI_ISL_421001|2020-03-23	1
Scotland/EDB073/2020|EPI_ISL_425870|2020-03-20					hCoV-19/Wales/PHWC-166F64/2020|EPI_ISL_494133|2020-06-27	R69I		hCoV-19/Wales/PHWC-1695AB/2020|EPI_ISL_499459|2020-06-25	1																						Guangdong/GDSZ202004-P0004/2020|EPI_ISL_413879|2020-02-05	C126T		England/BRIS-130859/2020|EPI_ISL_492595|2020-04-12	1
Scotland/EDB046/2020|EPI_ISL_425850|2020-03-15					hCoV-19/Wales/PHWC-166C8B/2020|EPI_ISL_494099|2020-06-27	R69I		hCoV-19/Wales/PHWC-166A72/2020|EPI_ISL_494075|2020-06-27	1																						Guangdong/GD2020258-P0018/2020|EPI_ISL_413878|2020-02-09	C126T		Malaysia/3998/2020|EPI_ISL_501210|2020-04-01	1
Spain/Granada-COV003014/2020|EPI_ISL_474891|2020-04-03					hCoV-19/Wales/PHWC-168973/2020|EPI_ISL_494310|2020-05-28	R69I		hCoV-19/Wales/PHWC-1667F3/2020|EPI_ISL_494043|2020-06-27	1																						USA/NY-NYUMC259/2020|EPI_ISL_428773|2020-04-05	C126T		Mali/M002659/2020|EPI_ISL_487451|2020-04-09	1
Spain/Granada-COV002964/2020|EPI_ISL_474883|2020-03-30					hCoV-19/Wales/PHWC-166B8E/2020|EPI_ISL_494088|2020-06-27	R69I		hCoV-19/Wales/PHWC-166ACD/2020|EPI_ISL_494078|2020-06-27	1																						Jingzhou/HBCDC-HB-01/2020|EPI_ISL_412459|2020-01-08	C126T		England/NOTT-112583/2020|EPI_ISL_484396|2020-04-27	1
Spain/Almeria-COV002863/2020|EPI_ISL_474843|2020-03-13					hCoV-19/Wales/PHWC-16691B/2020|EPI_ISL_494060|2020-06-27	R69I		hCoV-19/England/NORT-29E3DF/2020|EPI_ISL_493515|2020-04-30	1																						England/BRIS-12D52B/2020|EPI_ISL_481786|2020-05-04	C126T		England/BRIS-12DF96/2020|EPI_ISL_482019|2020-04-19	1
Spain/Alcala_la_Real-COV002995/2020|EPI_ISL_474835|2020-04-01					hCoV-19/Wales/PHWC-1668E1/2020|EPI_ISL_494057|2020-06-27	R69I		hCoV-19/Wales/PHWC-166F0A/2020|EPI_ISL_494130|2020-06-27	1																						Wales/PHWC-31BAB/2020|EPI_ISL_446538|2020-04-12	C126T		USA/WA-S1158/2020|EPI_ISL_463648|2020-05-04	1
Spain/Albacete-COV003884/2020|EPI_ISL_474827|2020-05-18					hCoV-19/Wales/PHWC-16676C/2020|EPI_ISL_494036|2020-06-27	R69I		hCoV-19/Wales/PHWC-167060/2020|EPI_ISL_494146|2020-06-27	1																						Sichuan/SC-WCH2-017/2020|EPI_ISL_451378|2020-01-28	C126T		England/BRIS-123C3F/2020|EPI_ISL_442779|2020-04-07	1
Spain/Albacete-COV003788/2020|EPI_ISL_474816|2020-04-02					hCoV-19/Wales/PHWC-1665CC/2020|EPI_ISL_494020|2020-06-27	R69I		hCoV-19/Wales/PHWC-166C03/2020|EPI_ISL_494094|2020-06-27	1																						Thailand/Bangkok_323/2020|EPI_ISL_447916|2020-01-29	C126T		USA/WA-S1409/2020|EPI_ISL_495859|2020-05-19	1
Sweden/20-06695/2020|EPI_ISL_450809|2020-03-31					hCoV-19/Wales/PHWC-166E58/2020|EPI_ISL_494121|2020-06-27	R69I		hCoV-19/Wales/PHWC-166359/2020|EPI_ISL_493985|2020-06-27	1																						England/NORW-EB487/2020|EPI_ISL_457434|2020-05-02	C126T		USA/WA-UW-10381/2020|EPI_ISL_501088|2020-06-04	1
USA/WA-S714/2020|EPI_ISL_449884|2020-04-07					hCoV-19/Wales/PHWC-166D2E/2020|EPI_ISL_494106|2020-06-27	R69I		hCoV-19/Wales/PHWC-166ABE/2020|EPI_ISL_494077|2020-06-27	1																						Shanghai/SH0104/2020|EPI_ISL_416395|2020-02-09	C126T		Guangdong/GD2020258-P0018/2020|EPI_ISL_413878|2020-02-09	1
USA/UT-01573/2020|EPI_ISL_449822|2020-04-07					hCoV-19/Wales/PHWC-1663A4/2020|EPI_ISL_493990|2020-06-27	R69I		hCoV-19/Wales/PHWC-166517/2020|EPI_ISL_494010|2020-06-27	1																						DRC/299/2020|EPI_ISL_420840|2020-03-20	C126T		USA/NY-NYUMC259/2020|EPI_ISL_428773|2020-04-05	1
Israel/CVL-nL33/2020|EPI_ISL_435292|2020-03					hCoV-19/Wales/PHWC-1695AB/2020|EPI_ISL_499459|2020-06-25	R69I		hCoV-19/Wales/PHWC-166A45/2020|EPI_ISL_494072|2020-06-27	1																						Morocco/RA85/2020|EPI_ISL_467299|2020-05-21	T127C		Jingzhou/HBCDC-HB-01/2020|EPI_ISL_412459|2020-01-08	1
Scotland/EDB065/2020|EPI_ISL_425864|2020-03-20					hCoV-19/Wales/PHWC-166A72/2020|EPI_ISL_494075|2020-06-27	R69I		hCoV-19/Wales/PHWC-16690C/2020|EPI_ISL_494059|2020-06-27	1																						England/NORT-295D52/2020|EPI_ISL_478662|2020-05-08	G128T		England/BRIS-12D52B/2020|EPI_ISL_481786|2020-05-04	1
Scotland/EDB052/2020|EPI_ISL_425856|2020-03-18					hCoV-19/Wales/PHWC-1667F3/2020|EPI_ISL_494043|2020-06-27	R69I		hCoV-19/Wales/PHWC-166DD3/2020|EPI_ISL_494115|2020-06-27	1																						England/LOND-D7002/2020|EPI_ISL_478452|2020-04-03	G128T		Wales/PHWC-31BAB/2020|EPI_ISL_446538|2020-04-12	1
Scotland/EDB032/2020|EPI_ISL_425838|2020-03-12					hCoV-19/Wales/PHWC-166ACD/2020|EPI_ISL_494078|2020-06-27	R69I		hCoV-19/Wales/PHWC-1695F6/2020|EPI_ISL_512485|2020-07-21	1																						England/NORT-292247/2020|EPI_ISL_489064|2020-05-07	G128T		Sichuan/SC-WCH2-017/2020|EPI_ISL_451378|2020-01-28	1
Scotland/EDB024/2020|EPI_ISL_425830|2020-03-12					hCoV-19/England/NORT-29E3DF/2020|EPI_ISL_493515|2020-04-30	R69I		hCoV-19/Wales/PHWC-166474/2020|EPI_ISL_494001|2020-06-27	1																						Australia/VIC1602/2020|EPI_ISL_456514|2020-05-10	G128C		Thailand/Bangkok_323/2020|EPI_ISL_447916|2020-01-29	1
Spain/Guadix-COV002999/2020|EPI_ISL_474899|2020-04-01					hCoV-19/Wales/PHWC-166F0A/2020|EPI_ISL_494130|2020-06-27	R69I		hCoV-19/Wales/PHWC-1663C2/2020|EPI_ISL_493992|2020-06-27	1																						SaudiArabia/KAUST-JEDDAH997/2020|EPI_ISL_513070|2020-06-17	G128T		England/NORW-EB487/2020|EPI_ISL_457434|2020-05-02	1
Spain/Granada-COV002944/2020|EPI_ISL_474877|2020-03-27					hCoV-19/Wales/PHWC-167060/2020|EPI_ISL_494146|2020-06-27	R69I		hCoV-19/Wales/PHWC-166AEB/2020|EPI_ISL_494080|2020-06-27	1																						SaudiArabia/KAUST-JEDDAH996/2020|EPI_ISL_513069|2020-06-17	G128T		Shanghai/SH0104/2020|EPI_ISL_416395|2020-02-09	1
Spain/Granada-COV002908/2020|EPI_ISL_474869|2020-03-18					hCoV-19/Wales/PHWC-166C03/2020|EPI_ISL_494094|2020-06-27	R69I		hCoV-19/Wales/PHWC-166869/2020|EPI_ISL_494050|2020-06-27	1																						USA/CA-ALSR-1877/2020|EPI_ISL_512215|2020-05-20	G128T		DRC/299/2020|EPI_ISL_420840|2020-03-20	1
Spain/Granada-COV002870/2020|EPI_ISL_474860|2020-03-16					hCoV-19/Wales/PHWC-166359/2020|EPI_ISL_493985|2020-06-27	R69I		hCoV-19/Wales/PHWC-1663D1/2020|EPI_ISL_493993|2020-06-27	1																						USA/WA-S2462/2020|EPI_ISL_497094|2020-06-14	G128T		England/NORT-295D52/2020|EPI_ISL_478662|2020-05-08	1
Spain/Cortijos_Nuevos-COV002876/2020|EPI_ISL_474852|2020-03-16					hCoV-19/Wales/PHWC-166ABE/2020|EPI_ISL_494077|2020-06-27	R69I		hCoV-19/Wales/PHWC-16666F/2020|EPI_ISL_494026|2020-06-27	1																						USA/WA-S1116/2020|EPI_ISL_463606|2020-05-04	C129T		England/LOND-D7002/2020|EPI_ISL_478452|2020-04-03	1
USA/WA-S726/2020|EPI_ISL_449896|2020-04-11					hCoV-19/Wales/PHWC-166517/2020|EPI_ISL_494010|2020-06-27	R69I		hCoV-19/Wales/PHWC-166896/2020|EPI_ISL_494053|2020-06-27	1																						Morocco/RA85/2020|EPI_ISL_467299|2020-05-21	G131A		England/NORT-292247/2020|EPI_ISL_489064|2020-05-07	1
USA/WA-S708/2020|EPI_ISL_449878|2020-04-09					hCoV-19/Wales/PHWC-166A45/2020|EPI_ISL_494072|2020-06-27	R69I		hCoV-19/Wales/PHWC-168CE3/2020|EPI_ISL_494354|2020-05-19	1																						Spain/COV001876/2020|EPI_ISL_452469|2020-03-09	C132T		Australia/VIC1602/2020|EPI_ISL_456514|2020-05-10	1
USA/WA-S700/2020|EPI_ISL_449870|2020-04-09					hCoV-19/Wales/PHWC-16690C/2020|EPI_ISL_494059|2020-06-27	R69I		hCoV-19/Wales/PHWC-166FEC/2020|EPI_ISL_494139|2020-06-27	1																						Spain/COV001877/2020|EPI_ISL_452468|2020-03-10	C132T		SaudiArabia/KAUST-JEDDAH997/2020|EPI_ISL_513070|2020-06-17	1
England/LOND-D57F0/2020|EPI_ISL_449725|2020-04-17					hCoV-19/Wales/PHWC-166DD3/2020|EPI_ISL_494115|2020-06-27	R69I		hCoV-19/Wales/PHWC-1664FC/2020|EPI_ISL_494008|2020-06-27	1																						Spain/COV001880/2020|EPI_ISL_452466|2020-03-11	C132T		SaudiArabia/KAUST-JEDDAH996/2020|EPI_ISL_513069|2020-06-17	1
England/LOND-D571E/2020|EPI_ISL_449717|2020-04-15					hCoV-19/Wales/PHWC-1695F6/2020|EPI_ISL_512485|2020-07-21	R69I		hCoV-19/Wales/PHWC-166C30/2020|EPI_ISL_494096|2020-06-27	1																						Morocco/RA85/2020|EPI_ISL_467299|2020-05-21	A134G		USA/CA-ALSR-1877/2020|EPI_ISL_512215|2020-05-20	1
England/LOND-D565D/2020|EPI_ISL_449709|2020-04-16					hCoV-19/Wales/PHWC-166474/2020|EPI_ISL_494001|2020-06-27	R69I		hCoV-19/Wales/PHWC-166957/2020|EPI_ISL_494062|2020-06-27	1																						Morocco/RA85/2020|EPI_ISL_467299|2020-05-21	T135G		USA/WA-S2462/2020|EPI_ISL_497094|2020-06-14	1
England/LOND-D55C9/2020|EPI_ISL_449701|2020-04-15					hCoV-19/Wales/PHWC-1663C2/2020|EPI_ISL_493992|2020-06-27	R69I		hCoV-19/Wales/PHWC-1668F0/2020|EPI_ISL_494058|2020-06-27	1																						India/nimh-14715/2020|EPI_ISL_486407|2020-05-10	A136G		USA/WA-S1116/2020|EPI_ISL_463606|2020-05-04	1
Scotland/EDB193/2020|EPI_ISL_425936|2020-03-24					hCoV-19/Wales/PHWC-166AEB/2020|EPI_ISL_494080|2020-06-27	R69I		hCoV-19/Wales/PHWC-16680F/2020|EPI_ISL_494044|2020-06-27	1																						India/nimh-14712/2020|EPI_ISL_486406|2020-05-10	A136G		Spain/COV001876/2020|EPI_ISL_452469|2020-03-09	1
Scotland/EDB182/2020|EPI_ISL_425928|2020-03-24					hCoV-19/Wales/PHWC-166869/2020|EPI_ISL_494050|2020-06-27	R69I		hCoV-19/Wales/PHWC-16668D/2020|EPI_ISL_494028|2020-06-27	1																						Shanghai/SH0071/2020|EPI_ISL_416374|2020-02-07	A136T		Spain/COV001877/2020|EPI_ISL_452468|2020-03-10	1
Scotland/EDB155/2020|EPI_ISL_425920|2020-03-23					hCoV-19/Wales/PHWC-1663D1/2020|EPI_ISL_493993|2020-06-27	R69I		hCoV-19/Wales/PHWC-166E1C/2020|EPI_ISL_494118|2020-06-27	1																						Austria/CeMM0342/2020|EPI_ISL_475803|2020-04-03	T138A		Spain/COV001880/2020|EPI_ISL_452466|2020-03-11	1
Scotland/EDB142/2020|EPI_ISL_425912|2020-03-23					hCoV-19/Wales/PHWC-16666F/2020|EPI_ISL_494026|2020-06-27	R69I		hCoV-19/Wales/PHWC-166D6A/2020|EPI_ISL_494109|2020-06-27	1																						Austria/CeMM0342/2020|EPI_ISL_475803|2020-04-03	G139T		India/nimh-14715/2020|EPI_ISL_486407|2020-05-10	1
Scotland/EDB120/2020|EPI_ISL_425904|2020-03-22					hCoV-19/Wales/PHWC-166896/2020|EPI_ISL_494053|2020-06-27	R69I		hCoV-19/Wales/PHWC-166BCA/2020|EPI_ISL_494091|2020-06-27	1																						England/20169000804/2020|EPI_ISL_466625|2020-04-17	G139T		India/nimh-14712/2020|EPI_ISL_486406|2020-05-10	1
Scotland/CVR236/2020|EPI_ISL_425751|2020-03-19					hCoV-19/Wales/PHWC-168CE3/2020|EPI_ISL_494354|2020-05-19	R69I		hCoV-19/England/NORT-29E5AC/2020|EPI_ISL_493519|2020-05-02	1																						Morocco/RA85/2020|EPI_ISL_467299|2020-05-21	T140G		Shanghai/SH0071/2020|EPI_ISL_416374|2020-02-07	1
Wales/PHWC-36AC7/2020|EPI_ISL_474757|2020-05-01					hCoV-19/Wales/PHWC-166FEC/2020|EPI_ISL_494139|2020-06-27	R69I		hCoV-19/England/NORT-29D130/2020|EPI_ISL_499507|2020-05-04	1																						Morocco/RA85/2020|EPI_ISL_467299|2020-05-21	T141C		England/20169000804/2020|EPI_ISL_466625|2020-04-17	1
India/GBRC101/2020|EPI_ISL_450790|2020-04-28					hCoV-19/Wales/PHWC-1664FC/2020|EPI_ISL_494008|2020-06-27	R69I		hCoV-19/USA/NY-WCMP5F01P/2020|EPI_ISL_427540|2020-03-13	1																						England/NOTT-11189A/2020|EPI_ISL_461935|2020-05-22	A143G		England/NOTT-11189A/2020|EPI_ISL_461935|2020-05-22	1
India/GBRC95a/2020|EPI_ISL_450782|2020-04-11					hCoV-19/Wales/PHWC-166C30/2020|EPI_ISL_494096|2020-06-27	R69I		hCoV-19/USA/NY-NYUMC709/2020|EPI_ISL_451424|2020-03-20	1																						England/NOTT-11143C/2020|EPI_ISL_453664|2020-05-17	A143G		England/NOTT-11143C/2020|EPI_ISL_453664|2020-05-17	1
United_Arab_Emirates/L2185/2020|EPI_ISL_435130|2020-03-12					hCoV-19/Wales/PHWC-166957/2020|EPI_ISL_494062|2020-06-27	R69I		hCoV-19/England/OXON-AFF42/2020|EPI_ISL_478837|2020-04-09	1																						Guangdong/GDSZ202004-P0004/2020|EPI_ISL_413879|2020-02-05	C144T		England/BRIS-1231E5/2020|EPI_ISL_442787|2020-04-05	1
United_Arab_Emirates/L0184/2020|EPI_ISL_435121|2020-02-25					hCoV-19/Wales/PHWC-1668F0/2020|EPI_ISL_494058|2020-06-27	R69I		hCoV-19/India/TF25/2020|EPI_ISL_508499|2020-06-19	1																						England/BRIS-1231E5/2020|EPI_ISL_442787|2020-04-05	C144T		USA/TX-HMH0291/2020|EPI_ISL_434917|2020-03-27	1
Wales/PHWC-36C76/2020|EPI_ISL_474784|2020-05-01					hCoV-19/Wales/PHWC-16680F/2020|EPI_ISL_494044|2020-06-27	R69I		hCoV-19/England/NOTT-10F659/2020|EPI_ISL_433031|2020-04-03	1																						USA/TX-HMH0291/2020|EPI_ISL_434917|2020-03-27	G145T		USA/MN-MDH-156/2020|EPI_ISL_460056|2020-03-23	1
United_Arab_Emirates/L1758/2020|EPI_ISL_435129|2020-03-10					hCoV-19/Wales/PHWC-16668D/2020|EPI_ISL_494028|2020-06-27	R69I		hCoV-19/England/CAMB-1B2C17/2020|EPI_ISL_456714|2020-05-18	1																						USA/MN-MDH-156/2020|EPI_ISL_460056|2020-03-23	G145T		Wales/PHWC-35D29/2020|EPI_ISL_474560|2020-04-26	1
USA/NY-NYUMC414/2020|EPI_ISL_435481|2020-03-30					hCoV-19/Wales/PHWC-166E1C/2020|EPI_ISL_494118|2020-06-27	R69I		hCoV-19/USA/NY-NYUMC484/2020|EPI_ISL_435549|2020-04-24	1																						Wales/PHWC-35D29/2020|EPI_ISL_474560|2020-04-26	G145T		USA/MN-MDH-149/2020|EPI_ISL_427287|2020-03-23	1
USA/LA-SR0161/2020|EPI_ISL_435464|2020-03-28					hCoV-19/Wales/PHWC-166D6A/2020|EPI_ISL_494109|2020-06-27	R69I		hCoV-19/Wales/PHWC-15E169/2020|EPI_ISL_472797|2020-05-16	1																						USA/MN-MDH-149/2020|EPI_ISL_427287|2020-03-23	G145T		England/OXON-AF57D/2020|EPI_ISL_478751|2020-04-14	1
USA/LA-SR0151/2020|EPI_ISL_435454|2020-04-02					hCoV-19/Wales/PHWC-166BCA/2020|EPI_ISL_494091|2020-06-27	R69I		hCoV-19/Wales/PHWC-15E7EF/2020|EPI_ISL_472832|2020-05-16	1																						England/OXON-AF57D/2020|EPI_ISL_478751|2020-04-14	G145T		England/OXON-AF3EC/2020|EPI_ISL_478733|2020	1
USA/LA-SR0141/2020|EPI_ISL_435446|2020-03-28					hCoV-19/England/NORT-29E5AC/2020|EPI_ISL_493519|2020-05-02	R69I		hCoV-19/USA/CA-CZB-1179/2020|EPI_ISL_454629|2020-04-30	1																						England/OXON-AF3EC/2020|EPI_ISL_478733|2020	G145T		Wales/PHWC-338DF/2020|EPI_ISL_446763|2020-04-21	1
Hungary/MBL-469/2020|EPI_ISL_435424|2020-03-27					hCoV-19/England/NORT-29D130/2020|EPI_ISL_499507|2020-05-04	R69I		hCoV-19/England/CAMB-77D0D/2020|EPI_ISL_440829|2020-04-01	1																						Wales/PHWC-338DF/2020|EPI_ISL_446763|2020-04-21	G145T		Switzerland/200055_614_B07/2020|EPI_ISL_510739|2020-07-13	1
Hungary/SRC-00620/2020|EPI_ISL_435416|2020-03-27					hCoV-19/USA/NY-WCMP5F01P/2020|EPI_ISL_427540|2020-03-13	V70F		hCoV-19/England/CAMB-1B2DE7/2020|EPI_ISL_477792|2020-05-18	1																						Switzerland/200055_614_B07/2020|EPI_ISL_510739|2020-07-13	G145T		USA/CA-ALSR-1089-SAN/2020|EPI_ISL_483516|2020-06-15	1
Hungary/SRC-00186/2020|EPI_ISL_435408|2020-03-22					hCoV-19/USA/NY-NYUMC709/2020|EPI_ISL_451424|2020-03-20	V70F		hCoV-19/Australia/NSW633/2020|EPI_ISL_490042|2020-07-01	1																						Northern_Ireland/NIRE-106ACF/2020|EPI_ISL_501013|2020-05-19	G145T		USA/CA-ALSR-1747/2020|EPI_ISL_512163|2020-05-29	1
USA/WI-GMF-01602/2020|EPI_ISL_435400|2020-04-23					hCoV-19/England/OXON-AFF42/2020|EPI_ISL_478837|2020-04-09	V70I		hCoV-19/England/CAMB-79B01/2020|EPI_ISL_433824|2020-03-26	1																						USA/CA-ALSR-1089-SAN/2020|EPI_ISL_483516|2020-06-15	G147A		USA/WA-S1853/2020|EPI_ISL_496279|2020-05-27	1
USA/WA-S816/2020|EPI_ISL_449986|2020-04-17					hCoV-19/India/TF25/2020|EPI_ISL_508499|2020-06-19	V70F		hCoV-19/Sweden/20-51317/2020|EPI_ISL_455105|2020-05-07	1																						USA/CA-ALSR-1747/2020|EPI_ISL_512163|2020-05-29	G147A		England/SHEF-BFEAC/2020|EPI_ISL_418303|2020-03-25	1
USA/WA-S800/2020|EPI_ISL_449970|2020-04-16					hCoV-19/Northern_Ireland/NIRE-106ACF/2020|EPI_ISL_501013|2020-05-19	V70A		hCoV-19/USA/CA-CZB-1171/2020|EPI_ISL_454624|2020-04-30	1																						USA/WA-S1853/2020|EPI_ISL_496279|2020-05-27	G147T		England/LIVE-A6A2C/2020|EPI_ISL_499765|2020-03-15	1
USA/WA-S792/2020|EPI_ISL_449962|2020-04-15					hCoV-19/England/NOTT-10F659/2020|EPI_ISL_433031|2020-04-03	P71L		hCoV-19/Croatia/14412_Koprivnica/2020|EPI_ISL_454602|2020-04-21	1																						England/SHEF-BFEAC/2020|EPI_ISL_418303|2020-03-25	A148G		USA/CA-CSMC120/2020|EPI_ISL_475597|2020-04-05	1
USA/WA-S784/2020|EPI_ISL_449954|2020-04-14					hCoV-19/England/CAMB-1B2C17/2020|EPI_ISL_456714|2020-05-18	P71L		hCoV-19/England/BRIS-126AC9/2020|EPI_ISL_458970|2020-04-10	1																						England/LIVE-A6A2C/2020|EPI_ISL_499765|2020-03-15	A148G		USA/WA-S1825/2020|EPI_ISL_496251|2020-06-02	1
USA/WA-S776/2020|EPI_ISL_449946|2020-04-14					hCoV-19/USA/NY-NYUMC484/2020|EPI_ISL_435549|2020-04-24	P71L		hCoV-19/England/NORT-2972AC/2020|EPI_ISL_488079|2020-04-27	1																						USA/CA-CSMC120/2020|EPI_ISL_475597|2020-04-05	G149T		Australia/VIC308/2020|EPI_ISL_419999|2020-03-23	1
USA/NY-NYUMC427/2020|EPI_ISL_435494|2020-04-16					hCoV-19/Wales/PHWC-15E169/2020|EPI_ISL_472797|2020-05-16	P71L		hCoV-19/England/SHEF-CD3CA/2020|EPI_ISL_475455|2020-04-29	1																						England/NORT-291FF6/2020|EPI_ISL_489065|2020-05-07	G149T		Wales/PHWC-2C666/2020|EPI_ISL_445890|2020-03-31	1
USA/NY-NYUMC409/2020|EPI_ISL_435476|2020-03-30					hCoV-19/Wales/PHWC-15E7EF/2020|EPI_ISL_472832|2020-05-16	P71L		hCoV-19/England/CAMB-1B2D6F/2020|EPI_ISL_477791|2020-05-18	1																						USA/WA-S1825/2020|EPI_ISL_496251|2020-06-02	C151T		Wales/PHWC-2F047/2020|EPI_ISL_446191|2020-04-06	1
Canada/AG1/2020|EPI_ISL_435344|2020-04					hCoV-19/USA/CA-CZB-1179/2020|EPI_ISL_454629|2020-04-30	P71L		hCoV-19/Spain/COV001907/2020|EPI_ISL_467072|2020-03-16	1																						Israel/CVL-n26112/2020|EPI_ISL_514285|2020-07-20	C151G		Scotland/EDB6445/2020|EPI_ISL_491609|2020-04-22	1
Scotland/EDB390/2020|EPI_ISL_425993|2020-03-30					hCoV-19/England/CAMB-77D0D/2020|EPI_ISL_440829|2020-04-01	P71L		hCoV-19/USA/WA-S365/2020|EPI_ISL_434125|2020-03-10	1																						Australia/VIC308/2020|EPI_ISL_419999|2020-03-23	G154A		Brazil/CV12/2020|EPI_ISL_429674|2020-03-11	1
Israel/CVL-n-13881/2020|EPI_ISL_474968|2020-04-01					hCoV-19/England/CAMB-1B2DE7/2020|EPI_ISL_477792|2020-05-18	P71L		hCoV-19/England/CAMB-1B2989/2020|EPI_ISL_456706|2020-05-18	1																						Wales/PHWC-2C666/2020|EPI_ISL_445890|2020-03-31	G154T		England/LCST-24D7105/2020|EPI_ISL_478364|2020-06-12	1
Israel/CVL-n-6751/2020|EPI_ISL_474960|2020-03-15					hCoV-19/Australia/NSW633/2020|EPI_ISL_490042|2020-07-01	P71S		hCoV-19/USA/CA-CZB-1178/2020|EPI_ISL_454628|2020-04-30	1																						Wales/PHWC-2F047/2020|EPI_ISL_446191|2020-04-06	G154T		England/LCST-24D6BBD/2020|EPI_ISL_484223|2020-06-08	1
Spain/Villarrobledo-COV003744/2020|EPI_ISL_474952|2020-04-01					hCoV-19/England/CAMB-79B01/2020|EPI_ISL_433824|2020-03-26	P71L		hCoV-19/Wales/PHWC-15E178/2020|EPI_ISL_472798|2020-05-13	1																						Scotland/EDB6445/2020|EPI_ISL_491609|2020-04-22	G154T		England/LCST-24D709F/2020|EPI_ISL_478360|2020-06-06	1
Spain/Malaga-COV002856/2020|EPI_ISL_474925|2020-03-12					hCoV-19/Sweden/20-51317/2020|EPI_ISL_455105|2020-05-07	P71L		hCoV-19/England/CAMB-1B2D41/2020|EPI_ISL_477790|2020-05-18	1																						Brazil/CV12/2020|EPI_ISL_429674|2020-03-11	T155A		England/LCST-24D6BAE/2020|EPI_ISL_484222|2020-06-08	1
Spain/Las_Palmas-COV002604/2020|EPI_ISL_474917|2020-03-18					hCoV-19/USA/CA-CZB-1171/2020|EPI_ISL_454624|2020-04-30	P71L		hCoV-19/USA/WA-UW-1588/2020|EPI_ISL_423012|2020-03-19	1																						England/LCST-24D7105/2020|EPI_ISL_478364|2020-06-12	A158G		England/LCST-24D6B35/2020|EPI_ISL_478331|2020-06-07	1
Spain/Jun-COV002906/2020|EPI_ISL_474909|2020-03-18					hCoV-19/Croatia/14412_Koprivnica/2020|EPI_ISL_454602|2020-04-21	P71L		hCoV-19/Spain/COV001098/2020|EPI_ISL_452589|2020-03-29	1																						England/LCST-24D6BBD/2020|EPI_ISL_484223|2020-06-08	A158G		DRC/6342/2020|EPI_ISL_495632|2020-05-09	1
USA/WA-S808/2020|EPI_ISL_449978|2020-04-15					hCoV-19/England/BRIS-126AC9/2020|EPI_ISL_458970|2020-04-10	P71L		hCoV-19/India/S21/2020|EPI_ISL_455651|2020-04-21	1																						England/LCST-24D709F/2020|EPI_ISL_478360|2020-06-06	A158G		Sichuan/SC-NC-071/2020|EPI_ISL_451330|2020-01-29	1
USA/WA-S775/2020|EPI_ISL_449945|2020-04-14					hCoV-19/England/NORT-2972AC/2020|EPI_ISL_488079|2020-04-27	P71L		hCoV-19/England/BRIS-126ABA/2020|EPI_ISL_459084|2020-04-09	1																						England/LCST-24D6BAE/2020|EPI_ISL_484222|2020-06-08	A158G		Netherlands/Gelderland_86/2020|EPI_ISL_460985|2020-05-19	1
USA/WA-S767/2020|EPI_ISL_449937|2020-04-14					hCoV-19/England/SHEF-CD3CA/2020|EPI_ISL_475455|2020-04-29	P71L		hCoV-19/England/SHEF-C5966/2020|EPI_ISL_432806|2020-03-20	1																						England/LCST-24D6B35/2020|EPI_ISL_478331|2020-06-07	A158G		Netherlands/Gelderland_78/2020|EPI_ISL_460977|2020-05-19	1
USA/WA-S759/2020|EPI_ISL_449929|2020-04-14					hCoV-19/England/CAMB-1B2D6F/2020|EPI_ISL_477791|2020-05-18	P71L		hCoV-19/England/CAMB-1B2D23/2020|EPI_ISL_477789|2020-05-18	1																						DRC/6342/2020|EPI_ISL_495632|2020-05-09	A158G		Netherlands/Flevoland_16/2020|EPI_ISL_460839|2020-05-20	1
USA/WA-S751/2020|EPI_ISL_449921|2020-04-11					hCoV-19/Spain/COV001907/2020|EPI_ISL_467072|2020-03-16	P71H		hCoV-19/Brazil/L7_CD63/2020|EPI_ISL_476432|2020-03-22	1																						Sichuan/SC-NC-071/2020|EPI_ISL_451330|2020-01-29	C160T		Netherlands/NA_630/2020|EPI_ISL_461065|2020-03-29	1
USA/WA-S743/2020|EPI_ISL_449913|2020-04-13					hCoV-19/USA/WA-S365/2020|EPI_ISL_434125|2020-03-10	P71L		hCoV-19/USA/NY-NYUMC471/2020|EPI_ISL_435536|2020-04-20	1																						Netherlands/Gelderland_86/2020|EPI_ISL_460985|2020-05-19	C164T		Netherlands/Utrecht_48/2020|EPI_ISL_461244|2020-05-20	1
USA/WA-S735/2020|EPI_ISL_449905|2020-04-13					hCoV-19/England/CAMB-1B2989/2020|EPI_ISL_456706|2020-05-18	P71L		hCoV-19/USA/CA-CZB-1156/2020|EPI_ISL_454617|2020-04-26	1																						Netherlands/Gelderland_78/2020|EPI_ISL_460977|2020-05-19	C164T		USA/WA-S507/2020|EPI_ISL_434267|2020-03-23	1
USA/WI-GMF-01481/2020|EPI_ISL_435395|2020-04-21					hCoV-19/USA/CA-CZB-1178/2020|EPI_ISL_454628|2020-04-30	P71L		hCoV-19/USA/VA-DCLS-0392/2020|EPI_ISL_467788|2020-04-19	1																						Netherlands/Flevoland_16/2020|EPI_ISL_460839|2020-05-20	C164T		USA/CA-CSMC20/2020|EPI_ISL_475630|2020-03-25	1
Scotland/EDB362/2020|EPI_ISL_425981|2020-03-28					hCoV-19/Wales/PHWC-15E178/2020|EPI_ISL_472798|2020-05-13	P71L		hCoV-19/England/NORT-295BD0/2020|EPI_ISL_478655|2020-04-03	1																						Netherlands/NA_630/2020|EPI_ISL_461065|2020-03-29	C164T		Netherlands/Gelderland_85/2020|EPI_ISL_460984|2020-05-19	1
Scotland/EDB327/2020|EPI_ISL_425973|2020-03-28					hCoV-19/England/CAMB-1B2D41/2020|EPI_ISL_477790|2020-05-18	P71L		hCoV-19/USA/WI-UW-444/2020|EPI_ISL_484819|2020-06-18	1																						Netherlands/Utrecht_48/2020|EPI_ISL_461244|2020-05-20	C164T		Netherlands/Gelderland_77/2020|EPI_ISL_460976|2020-05-19	1
Scotland/EDB288/2020|EPI_ISL_425965|2020-03-27					hCoV-19/USA/WA-UW-1588/2020|EPI_ISL_423012|2020-03-19	P71L		hCoV-19/England/CAMB-1B2C62/2020|EPI_ISL_477788|2020-05-18	1																						USA/WA-S507/2020|EPI_ISL_434267|2020-03-23	C164T		USA/WA-UW-1677/2020|EPI_ISL_424214|2020-03-20	1
Scotland/EDB266/2020|EPI_ISL_425957|2020-03-27					hCoV-19/Spain/COV001098/2020|EPI_ISL_452589|2020-03-29	P71L		hCoV-19/England/LOND-D5BC7/2020|EPI_ISL_444239|2020-04-17	1																						USA/CA-CSMC20/2020|EPI_ISL_475630|2020-03-25	C164T		Portugal/PT0387/2020|EPI_ISL_454103|2020-03-20	1
Scotland/EDB226/2020|EPI_ISL_425949|2020-03-26					hCoV-19/India/S21/2020|EPI_ISL_455651|2020-04-21	P71L		hCoV-19/England/CAMB-1B2BFC/2020|EPI_ISL_456712|2020-05-18	1																						Netherlands/Gelderland_85/2020|EPI_ISL_460984|2020-05-19	C164T		Netherlands/Gelderland_93/2020|EPI_ISL_460992|2020-05-23	1
Israel/CVL-n-7467/2020|EPI_ISL_474997|2020-04-11					hCoV-19/England/BRIS-126ABA/2020|EPI_ISL_459084|2020-04-09	P71L		hCoV-19/Brazil/L9_CD91/2020|EPI_ISL_476490|2020-03-24	1																						Netherlands/Gelderland_77/2020|EPI_ISL_460976|2020-05-19	C164T		Netherlands/Gelderland_84/2020|EPI_ISL_460983|2020-05-19	1
Israel/CVL-n-5856/2020|EPI_ISL_474986|2020-03-15					hCoV-19/England/SHEF-C5966/2020|EPI_ISL_432806|2020-03-20	P71L		hCoV-19/Spain/Donostia-San_Sebastian_COV003224/2020|EPI_ISL_480992|2020-03-14	1																						USA/WA-UW-1677/2020|EPI_ISL_424214|2020-03-20	C164T		England/NOTT-10FC0C/2020|EPI_ISL_432699|2020-04-07	1
Israel/CVL-n-7154/2020|EPI_ISL_474978|2020-04-11					hCoV-19/England/CAMB-1B2D23/2020|EPI_ISL_477789|2020-05-18	P71L		hCoV-19/England/NORW-E8262/2020|EPI_ISL_449130|2020-04-08	1																						Portugal/PT0387/2020|EPI_ISL_454103|2020-03-20	C164T		England/OXON-B07BF/2020|EPI_ISL_478907|2020-04-20	1
Spain/Tazona-COV003768/2020|EPI_ISL_474946|2020-04-03					hCoV-19/Brazil/L7_CD63/2020|EPI_ISL_476432|2020-03-22	P71L		hCoV-19/England/NORW-EA093/2020|EPI_ISL_461854|2020-05-18	1																						Netherlands/Gelderland_93/2020|EPI_ISL_460992|2020-05-23	C164T		Netherlands/Gelderland_92/2020|EPI_ISL_460991|2020-05-23	1
Spain/Pinos_Puente-COV002901/2020|EPI_ISL_474938|2020-03-18					hCoV-19/USA/NY-NYUMC471/2020|EPI_ISL_435536|2020-04-20	P71L		hCoV-19/USA/CA-CZB-1520/2020|EPI_ISL_468466|2020-05-11	1																						Netherlands/Gelderland_84/2020|EPI_ISL_460983|2020-05-19	C164T		Netherlands/Gelderland_83/2020|EPI_ISL_460982|2020-05-19	1
Spain/Maracena-COV002953/2020|EPI_ISL_474930|2020-03-29					hCoV-19/USA/CA-CZB-1156/2020|EPI_ISL_454617|2020-04-26	P71L		hCoV-19/USA/WI-UW-685/2020|EPI_ISL_491366|2020-06-25	1																						England/NOTT-10FC0C/2020|EPI_ISL_432699|2020-04-07	C164T		Netherlands/Gelderland_91/2020|EPI_ISL_460990|2020-05-22	1
USA/WA-S822/2020|EPI_ISL_449992|2020-04-16					hCoV-19/USA/VA-DCLS-0392/2020|EPI_ISL_467788|2020-04-19	P71S		hCoV-19/England/BRIS-1236E6/2020|EPI_ISL_442731|2020-04-06	1																						Australia/SAP327/2020|EPI_ISL_483105|2020-03-27	C164T		Netherlands/Gelderland_82/2020|EPI_ISL_460981|2020-05-19	1
England/NOTT-10E07A/2020|EPI_ISL_425490|2020-03-18					hCoV-19/England/NORT-295BD0/2020|EPI_ISL_478655|2020-04-03	P71L		hCoV-19/England/CAMB-1B2C44/2020|EPI_ISL_477787|2020-05-18	1																						England/OXON-B07BF/2020|EPI_ISL_478907|2020-04-20	C164T		Netherlands/NA_183/2020|EPI_ISL_422718|2020-03-23	1
England/NOTT-10DFBA/2020|EPI_ISL_425478|2020-03-15					hCoV-19/USA/WI-UW-444/2020|EPI_ISL_484819|2020-06-18	P71S		hCoV-19/England/CAMB-1B235E/2020|EPI_ISL_456679|2020-05-18	1																						Netherlands/Gelderland_92/2020|EPI_ISL_460991|2020-05-23	C164T		Netherlands/Gelderland_90/2020|EPI_ISL_460989|2020-05-22	1
England/CAMB-76FF9/2020|EPI_ISL_425449|2020-04-01					hCoV-19/England/CAMB-1B2C62/2020|EPI_ISL_477788|2020-05-18	P71L		hCoV-19/England/CAMB-1B2BDE/2020|EPI_ISL_456710|2020-05-18	1																						Netherlands/Gelderland_83/2020|EPI_ISL_460982|2020-05-19	C164T		Netherlands/Gelderland_81/2020|EPI_ISL_460980|2020-05-19	1
England/CAMB-75631/2020|EPI_ISL_425416|2020-03-15					hCoV-19/England/LOND-D5BC7/2020|EPI_ISL_444239|2020-04-17	P71L		hCoV-19/England/20180032504/2020|EPI_ISL_465437|2020-04-27	1																						Netherlands/Gelderland_91/2020|EPI_ISL_460990|2020-05-22	C164T		England/NORT-2896DE/2020|EPI_ISL_458689|2020-03-31	1
England/CAMB-755BC/2020|EPI_ISL_425408|2020-03-15					hCoV-19/England/CAMB-1B2BFC/2020|EPI_ISL_456712|2020-05-18	P71L		hCoV-19/Spain/Madrid_LP10_12/2020|EPI_ISL_417969|2020-03-09	1																						Netherlands/Gelderland_82/2020|EPI_ISL_460981|2020-05-19	C164T		Netherlands/Gelderland_88/2020|EPI_ISL_460987|2020-05-20	1
England/CAMB-75507/2020|EPI_ISL_425400|2020-03-13					hCoV-19/Brazil/L9_CD91/2020|EPI_ISL_476490|2020-03-24	P71L		hCoV-19/England/BRIS-126CB4/2020|EPI_ISL_459072|2020-04-10	1																						Netherlands/NA_640/2020|EPI_ISL_461075|2020-05-03	C164T		Netherlands/Gelderland_80/2020|EPI_ISL_460979|2020-05-19	1
Wales/PHWC-3512D/2020|EPI_ISL_474435|2020-04-26					hCoV-19/Spain/Donostia-San_Sebastian_COV003224/2020|EPI_ISL_480992|2020-03-14	P71L		hCoV-19/Scotland/CVR2615/2020|EPI_ISL_484616|2020-04-15	1																						England/LIVE-A065B/2020|EPI_ISL_472124|2020-05-27	C164T		Netherlands/Flevoland_18/2020|EPI_ISL_460841|2020-05-22	1
USA/CA-CZB-1226/2020|EPI_ISL_450475|2020-03-19					hCoV-19/England/NORW-E8262/2020|EPI_ISL_449130|2020-04-08	P71L		hCoV-19/England/CAMB-1AAE0D/2020|EPI_ISL_470326|2020-04-19	1																						Netherlands/NA_183/2020|EPI_ISL_422718|2020-03-23	C164T		Netherlands/Utrecht_50/2020|EPI_ISL_461246|2020-05-22	1
Wuhan/WHUH004/2020|EPI_ISL_449479|2020-01-22					hCoV-19/England/NORW-EA093/2020|EPI_ISL_461854|2020-05-18	P71L		hCoV-19/England/CAMB-7B2CE/2020|EPI_ISL_433938|2020-04-12	1																						Netherlands/Gelderland_90/2020|EPI_ISL_460989|2020-05-22	C164T		Netherlands/Gelderland_89/2020|EPI_ISL_460988|2020-05-22	1
England/NOTT-10DF14/2020|EPI_ISL_425469|2020-03-12					hCoV-19/USA/CA-CZB-1520/2020|EPI_ISL_468466|2020-05-11	P71L		hCoV-19/USA/CA-CZB077/2020|EPI_ISL_428996|2020-03-28	1																						Netherlands/Gelderland_81/2020|EPI_ISL_460980|2020-05-19	C164T		Netherlands/Gelderland_87/2020|EPI_ISL_460986|2020-05-20	1
England/CAMB-7707D/2020|EPI_ISL_425457|2020-04-01					hCoV-19/USA/WI-UW-685/2020|EPI_ISL_491366|2020-06-25	P71S		hCoV-19/England/CAMB-1B2330/2020|EPI_ISL_456678|2020-05-18	1																						England/NORT-2896DE/2020|EPI_ISL_458689|2020-03-31	C164T		Netherlands/Gelderland_79/2020|EPI_ISL_460978|2020-05-19	1
England/CAMB-76FBD/2020|EPI_ISL_425445|2020-04-01					hCoV-19/England/BRIS-1236E6/2020|EPI_ISL_442731|2020-04-06	P71L		hCoV-19/USA/CA-CZB-1183/2020|EPI_ISL_454630|2020-04-30	1																						Netherlands/Gelderland_88/2020|EPI_ISL_460987|2020-05-20	C164T		Netherlands/Flevoland_17/2020|EPI_ISL_460840|2020-05-22	1
England/CAMB-76EDE/2020|EPI_ISL_425437|2020-03-31					hCoV-19/England/CAMB-1B2C44/2020|EPI_ISL_477787|2020-05-18	P71L		hCoV-19/Wales/PHWC-164E3C/2020|EPI_ISL_479387|2020-06-06	1																						Netherlands/Gelderland_80/2020|EPI_ISL_460979|2020-05-19	C164T		Netherlands/Utrecht_49/2020|EPI_ISL_461245|2020-05-20	1
England/CAMB-76DD1/2020|EPI_ISL_425429|2020-03-30					hCoV-19/England/CAMB-1B235E/2020|EPI_ISL_456679|2020-05-18	P71L		hCoV-19/Sweden/20-52074/2020|EPI_ISL_510873|2020-06-15	1																						Netherlands/Flevoland_18/2020|EPI_ISL_460841|2020-05-22	C164T		Portugal/PT0376/2020|EPI_ISL_454092|2020-03-20	1
England/20118132404/2020|EPI_ISL_464966|2020-03-12					hCoV-19/England/CAMB-1B2BDE/2020|EPI_ISL_456710|2020-05-18	P71L		hCoV-19/Sweden/20-52052/2020|EPI_ISL_510870|2020-06-04	1																						Netherlands/Utrecht_50/2020|EPI_ISL_461246|2020-05-22	C164T		Norway/2829/2020|EPI_ISL_493382|2020-06-29	1
England/20118111904/2020|EPI_ISL_464956|2020-03-10					hCoV-19/England/20180032504/2020|EPI_ISL_465437|2020-04-27	P71L		hCoV-19/Sweden/20-51746/2020|EPI_ISL_510843|2020-05-22	1																						Netherlands/Gelderland_89/2020|EPI_ISL_460988|2020-05-22	C164T		England/LIVE-A120B/2020|EPI_ISL_499984|2020-05-17	1
England/20118087504/2020|EPI_ISL_464946|2020-03-12					hCoV-19/Spain/Madrid_LP10_12/2020|EPI_ISL_417969|2020-03-09	P71L		hCoV-19/Russia/StPetersburg-RII9304V/2020|EPI_ISL_507295|2020-04-24	1																						England/CAMB-7D2EA/2020|EPI_ISL_441590|2020-04-06	C164T		Portugal/PT1006/2020|EPI_ISL_511553|2020-03-27	1
England/20118070504/2020|EPI_ISL_464938|2020-03-12					hCoV-19/England/BRIS-126CB4/2020|EPI_ISL_459072|2020-04-10	P71L		hCoV-19/USA/WA-S1919/2020|EPI_ISL_497348|2020-06-02	1																						Netherlands/Gelderland_87/2020|EPI_ISL_460986|2020-05-20	C164T		USA/LA-SR0265/2020|EPI_ISL_445120|2020-04-02	1
Canada/Qc-L00241355/2020|EPI_ISL_450318|2020-03-27					hCoV-19/Scotland/CVR2615/2020|EPI_ISL_484616|2020-04-15	P71L		hCoV-19/Brazil/PE-IAM39/2020|EPI_ISL_500481|2020-04-08	1																						Netherlands/Gelderland_79/2020|EPI_ISL_460978|2020-05-19	C164T		England/SHEF-D30BB/2020|EPI_ISL_442518|2020-03-24	1
Canada/Qc-L00241042/2020|EPI_ISL_450310|2020-03-27					hCoV-19/England/CAMB-1AAE0D/2020|EPI_ISL_470326|2020-04-19	P71L		hCoV-19/USA/MI-MDHHS-SC21161/2020|EPI_ISL_507418|2020-07-01	1																						Netherlands/Flevoland_17/2020|EPI_ISL_460840|2020-05-22	C164T		Wales/PHWC-2C5A5/2020|EPI_ISL_445878|2020-03-31	1
Canada/Qc-L00240556/2020|EPI_ISL_450302|2020-03-27					hCoV-19/England/CAMB-7B2CE/2020|EPI_ISL_433938|2020-04-12	P71L		hCoV-19/India/IK19/2020|EPI_ISL_508348|2020-04-24	1																						Netherlands/Utrecht_49/2020|EPI_ISL_461245|2020-05-20	C164T		Wales/PHWC-27B5D/2020|EPI_ISL_432327|2020-04-01	1
Scotland/EDB4709/2020|EPI_ISL_449325|2020-04-27					hCoV-19/USA/CA-CZB077/2020|EPI_ISL_428996|2020-03-28	P71L		hCoV-19/USA/WA-S1694/2020|EPI_ISL_496120|2020-05-31	1																						Portugal/PT0376/2020|EPI_ISL_454092|2020-03-20	C164T		Wales/PHWC-2BF8A/2020|EPI_ISL_474262|2020-04-02	1
Scotland/EDB4658/2020|EPI_ISL_449317|2020-05-08					hCoV-19/England/CAMB-1B2330/2020|EPI_ISL_456678|2020-05-18	P71L		hCoV-19/USA/CA-ALSR-1398/2020|EPI_ISL_494584|2020-05-05	1																						Norway/2829/2020|EPI_ISL_493382|2020-06-29	C164T		Wales/PHWC-2D2BC/2020|EPI_ISL_445966|2020-04-04	1
Scotland/EDB4401/2020|EPI_ISL_449309|2020-05-04					hCoV-19/USA/CA-CZB-1183/2020|EPI_ISL_454630|2020-04-30	P71L		hCoV-19/Northern_Ireland/NIRE-10650A/2020|EPI_ISL_500962|2020-05-04	1																						England/LIVE-A120B/2020|EPI_ISL_499984|2020-05-17	C164T		Spain/Malaga-COV002856/2020|EPI_ISL_474925|2020-03-12	1
England/LOND-D382C/2020|EPI_ISL_440993|2020-04-02					hCoV-19/Wales/PHWC-164E3C/2020|EPI_ISL_479387|2020-06-06	P71L		hCoV-19/India/IK60/2020|EPI_ISL_508386|2020-05-07	1																						Portugal/PT1006/2020|EPI_ISL_511553|2020-03-27	C164T		Argentina/PAIS-A0023/2020|EPI_ISL_430814|2020-04-17	1
England/LOND-D37A7/2020|EPI_ISL_440985|2020-03-31					hCoV-19/Sweden/20-52074/2020|EPI_ISL_510873|2020-06-15	P71L		hCoV-19/USA/CA-IGI-0067/2020|EPI_ISL_511821|2020-06-12	1																						USA/LA-SR0265/2020|EPI_ISL_445120|2020-04-02	T165C		Argentina/PAIS-A0024/2020|EPI_ISL_430815|2020-04-18	1
England/LOND-D36F5/2020|EPI_ISL_440976|2020-03-31					hCoV-19/Sweden/20-52052/2020|EPI_ISL_510870|2020-06-04	P71S		hCoV-19/USA/NM-NMDOH-2020219018/2020|EPI_ISL_510881|2020-07-17	1																						England/SHEF-D30BB/2020|EPI_ISL_442518|2020-03-24	T166C		England/BRIS-128414/2020|EPI_ISL_469694|2020-04-16	1
England/LIVE-9C9D1/2020|EPI_ISL_440928|2020-04-24					hCoV-19/Sweden/20-51746/2020|EPI_ISL_510843|2020-05-22	P71S		hCoV-19/USA/MI-MDHHS-SC21188/2020|EPI_ISL_507445|2020-07-06	1																						Wales/PHWC-2C5A5/2020|EPI_ISL_445878|2020-03-31	C171T		England/BRIS-123992/2020|EPI_ISL_442661|2020-04-07	1
England/LIVE-9BDE5/2020|EPI_ISL_440920|2020-04-19					hCoV-19/Russia/StPetersburg-RII9304V/2020|EPI_ISL_507295|2020-04-24	P71S		hCoV-19/Guangzhou/GZMU0030/2020|EPI_ISL_414686|2020-02-27	1																						Wales/PHWC-27B5D/2020|EPI_ISL_432327|2020-04-01	C171T		England/BRIS-129EBB/2020|EPI_ISL_458317|2020-04-16	1
England/LIVE-9BD4F/2020|EPI_ISL_440912|2020-04-19					hCoV-19/USA/WA-S1919/2020|EPI_ISL_497348|2020-06-02	P71L		hCoV-19/France/HF3290/2020|EPI_ISL_421509|2020-03-23	1																						Wales/PHWC-2BF8A/2020|EPI_ISL_474262|2020-04-02	C171T		England/BRIS-121E3B/2020|EPI_ISL_440029|2020-03-31	1
England/CAMB-7537E/2020|EPI_ISL_425386|2020					hCoV-19/Brazil/PE-IAM39/2020|EPI_ISL_500481|2020-04-08	P71L		hCoV-19/England/CAMB-7DAB5/2020|EPI_ISL_441745|2020-04-06	1																						Wales/PHWC-2D2BC/2020|EPI_ISL_445966|2020-04-04	C171T		England/20109093606/2020|EPI_ISL_417285|2020-03-06	1
England/CAMB-74DF1/2020|EPI_ISL_425376|2020-03-18					hCoV-19/USA/MI-MDHHS-SC21161/2020|EPI_ISL_507418|2020-07-01	P71S		hCoV-19/France/HF3138/2020|EPI_ISL_420056|2020-03-22	1																						Spain/Malaga-COV002856/2020|EPI_ISL_474925|2020-03-12	G172T		Argentina/Heritas_HG007/2020|EPI_ISL_476565|2020-05-09	1
England/CAMB-74CA9/2020|EPI_ISL_425363|2020-03-16					hCoV-19/India/IK19/2020|EPI_ISL_508348|2020-04-24	P71L		hCoV-19/Switzerland/120055/2020|EPI_ISL_468236|2020-04-20	1																						Argentina/PAIS-A0023/2020|EPI_ISL_430814|2020-04-17	G172T		Argentina/Heritas_HG001/2020|EPI_ISL_476496|2020-04-22	1
England/CAMB-74BF7/2020|EPI_ISL_425355|2020-03-17					hCoV-19/USA/WA-S1694/2020|EPI_ISL_496120|2020-05-31	P71S		hCoV-19/England/CAMB-7DA79/2020|EPI_ISL_441725|2020-04-06	1																						Argentina/PAIS-A0024/2020|EPI_ISL_430815|2020-04-18	G172T		England/BRIS-125CD3/2020|EPI_ISL_443791|2020-03-31	1
England/CAMB-74535/2020|EPI_ISL_425303|2020-03-27					hCoV-19/USA/CA-ALSR-1398/2020|EPI_ISL_494584|2020-05-05	P71L		hCoV-19/England/20144049804/2020|EPI_ISL_423545|2020-03-31	1																						England/BRIS-128414/2020|EPI_ISL_469694|2020-04-16	G172T		England/BRIS-129422/2020|EPI_ISL_458722|2020-04-20	1
England/20118050904/2020|EPI_ISL_464924|2020-03-13					hCoV-19/Northern_Ireland/NIRE-10650A/2020|EPI_ISL_500962|2020-05-04	P71L		hCoV-19/Israel/2046616/2020|EPI_ISL_447401|2020-04-02	1																						England/BRIS-123992/2020|EPI_ISL_442661|2020-04-07	G172T		England/BRIS-122CB8/2020|EPI_ISL_440669|2020-04-01	1
England/201180469/2020|EPI_ISL_464916|2020-03-10					hCoV-19/India/IK60/2020|EPI_ISL_508386|2020-05-07	P71S		hCoV-19/England/CAMB-7DB58/2020|EPI_ISL_441724|2020-04-06	1																						England/BRIS-129EBB/2020|EPI_ISL_458317|2020-04-16	G172T		England/OXON-ACA53/2020|EPI_ISL_448504|2020-04-05	1
England/20118039804/2020|EPI_ISL_464908|2020-03-13					hCoV-19/USA/CA-IGI-0067/2020|EPI_ISL_511821|2020-06-12	P71S		hCoV-19/England/CAMB-81377/2020|EPI_ISL_442597|2020-04-11	1																						England/BRIS-121E3B/2020|EPI_ISL_440029|2020-03-31	G172T		England/BRIS-1266F2/2020|EPI_ISL_459074|2020-04-09	1
England/201180343/2020|EPI_ISL_464900|2020-03-11					hCoV-19/USA/NM-NMDOH-2020219018/2020|EPI_ISL_510881|2020-07-17	P71S		hCoV-19/England/CAMB-7F7CB/2020|EPI_ISL_470393|2020-04-08	1																						England/20109093606/2020|EPI_ISL_417285|2020-03-06	G172C		England/BRIS-12E0A1/2020|EPI_ISL_482021|2020-04-20	1
Scotland/EDB4381/2020|EPI_ISL_449304|2020-05-04					hCoV-19/USA/MI-MDHHS-SC21188/2020|EPI_ISL_507445|2020-07-06	P71S		hCoV-19/England/CAMB-7C88F/2020|EPI_ISL_470531|2020-04-05	1																						Argentina/Heritas_HG007/2020|EPI_ISL_476565|2020-05-09	G172T		England/OXON-B102C/2020|EPI_ISL_478988|2020	1
England/LOND-D3622/2020|EPI_ISL_440966|2020-04-02					hCoV-19/Guangzhou/GZMU0030/2020|EPI_ISL_414686|2020-02-27	D72Y		hCoV-19/England/20139008404/2020|EPI_ISL_421864|2020-03-27	1																						Argentina/Heritas_HG001/2020|EPI_ISL_476496|2020-04-22	G172T		England/BRIS-12E0DE/2020|EPI_ISL_481765|2020-04-20	1
England/LOND-D359E/2020|EPI_ISL_440958|2020-03-27					hCoV-19/France/HF3290/2020|EPI_ISL_421509|2020-03-23	D72G		hCoV-19/Sichuan/SC-PHCC2-039/2020|EPI_ISL_451359|2020-01-27	1																						England/BRIS-125CD3/2020|EPI_ISL_443791|2020-03-31	G172T		Argentina/Heritas_HG006/2020|EPI_ISL_476561|2020-05-07	1
England/LIVE-9CE87/2020|EPI_ISL_440949|2020-04-26					hCoV-19/England/CAMB-7DAB5/2020|EPI_ISL_441745|2020-04-06	D72H		hCoV-19/England/NORW-E8235/2020|EPI_ISL_449127|2020-04-08	1																						England/BRIS-129422/2020|EPI_ISL_458722|2020-04-20	G172T		England/CAMB-79AB9/2020|EPI_ISL_433819|2020-03-27	1
England/LIVE-9CCD8/2020|EPI_ISL_440941|2020-04-26					hCoV-19/France/HF3138/2020|EPI_ISL_420056|2020-03-22	D72G		hCoV-19/France/HF2237/2020|EPI_ISL_416496|2020-03-10	1																						England/BRIS-122CB8/2020|EPI_ISL_440669|2020-04-01	G172C		England/20136088602/2020|EPI_ISL_420640|2020-03-23	1
England/LIVE-9CA38/2020|EPI_ISL_440931|2020-04-23					hCoV-19/Switzerland/120055/2020|EPI_ISL_468236|2020-04-20	D72Y		hCoV-19/England/NORW-E80C2/2020|EPI_ISL_449105|2020-04-08	1																						England/OXON-ACA53/2020|EPI_ISL_448504|2020-04-05	G172C		Argentina/PAIS-A0026/2020|EPI_ISL_430817|2020-04-18	1
England/CAMB-74B33/2020|EPI_ISL_425347|2020-03-18					hCoV-19/England/CAMB-7DA79/2020|EPI_ISL_441725|2020-04-06	D72H		hCoV-19/England/CAMB-7911E/2020|EPI_ISL_441130|2020-04-03	1																						England/BRIS-1266F2/2020|EPI_ISL_459074|2020-04-09	G172T		USA/CA-ALSR-1223/2020|EPI_ISL_494447|2020-04-10	1
England/CAMB-7491B/2020|EPI_ISL_425338|2020-03-28					hCoV-19/England/20144049804/2020|EPI_ISL_423545|2020-03-31	D72H		hCoV-19/England/20126104604/2020|EPI_ISL_423916|2020-03-18	1																						England/BRIS-12E0A1/2020|EPI_ISL_482021|2020-04-20	G172T		England/BRIS-1310BA/2020|EPI_ISL_501564|2020-03-14	1
England/CAMB-74711/2020|EPI_ISL_425327|2020-03-29					hCoV-19/Israel/2046616/2020|EPI_ISL_447401|2020-04-02	D72Y		hCoV-19/England/CAMB-7B668/2020|EPI_ISL_441208|2020-04-04	1																						England/OXON-B102C/2020|EPI_ISL_478988|2020	G172T		Latvia/107/2020|EPI_ISL_515194|2020-08-05	1
England/CAMB-74623/2020|EPI_ISL_425317|2020-03-22					hCoV-19/England/CAMB-7DB58/2020|EPI_ISL_441724|2020-04-06	D72H		hCoV-19/England/CAMB-7C39D/2020|EPI_ISL_434035|2020-04-13	1																						England/BRIS-12E0DE/2020|EPI_ISL_481765|2020-04-20	G172T		USA/MI-MDHHS-SC21051/2020|EPI_ISL_507827|2020-03-27	1
England/CAMB-7459F/2020|EPI_ISL_425309|2020-03-30					hCoV-19/England/CAMB-81377/2020|EPI_ISL_442597|2020-04-11	D72H		hCoV-19/England/20142014504/2020|EPI_ISL_423430|2020-03-31	1																						Argentina/Heritas_HG006/2020|EPI_ISL_476561|2020-05-07	G172T		USA/WA-UW-6490/2020|EPI_ISL_437847|2020-04-03	1
Wales/PHWC-329CE/2020|EPI_ISL_474377|2020-04-14					hCoV-19/England/CAMB-7F7CB/2020|EPI_ISL_470393|2020-04-08	D72H		hCoV-19/France/HF2946/2020|EPI_ISL_420049|2020-03-19	1																						England/CAMB-79AB9/2020|EPI_ISL_433819|2020-03-27	G172C		Australia/NSW354/2020|EPI_ISL_451615|2020-04-17	1
Wales/PHWC-2DEC7/2020|EPI_ISL_474318|2020-04-08					hCoV-19/England/CAMB-7C88F/2020|EPI_ISL_470531|2020-04-05	D72H		hCoV-19/England/CAMB-7D262/2020|EPI_ISL_442123|2020-04-06	1																						England/20136088602/2020|EPI_ISL_420640|2020-03-23	G172C		Latvia/043/2020|EPI_ISL_492988|2020-06-30	1
England/20118172104/2020|EPI_ISL_464995|2020-03-13					hCoV-19/England/20139008404/2020|EPI_ISL_421864|2020-03-27	D72H		hCoV-19/England/CAMB-7BA02/2020|EPI_ISL_442245|2020-04-04	1																						Argentina/PAIS-A0026/2020|EPI_ISL_430817|2020-04-18	G172T		Latvia/088/2020|EPI_ISL_512313|2020-06-17	1
England/20118158906/2020|EPI_ISL_464986|2020-03-12					hCoV-19/Sichuan/SC-PHCC2-039/2020|EPI_ISL_451359|2020-01-27	D72N		hCoV-19/England/CAMB-792EE/2020|EPI_ISL_441203|2020-04-03	1																						USA/CA-ALSR-1223/2020|EPI_ISL_494447|2020-04-10	G172T		Latvia/092/2020|EPI_ISL_512647|2020-06-26	1
England/20118147904/2020|EPI_ISL_464976|2020-03-12					hCoV-19/England/NORW-E8235/2020|EPI_ISL_449127|2020-04-08	D72H		hCoV-19/England/CAMB-794AC/2020|EPI_ISL_441133|2020-04-03	1																						England/BRIS-1310BA/2020|EPI_ISL_501564|2020-03-14	G172C		Japan/PG-0457/2020|EPI_ISL_480118|2020-03-27	1
Poland/IHG_PAS_1_77/2020|EPI_ISL_450338|2020-04-11					hCoV-19/France/HF2237/2020|EPI_ISL_416496|2020-03-10	D72G		hCoV-19/England/CAMB-7D772/2020|EPI_ISL_441657|2020-04-06	1																						Latvia/107/2020|EPI_ISL_515194|2020-08-05	G172T		Philippines/RITM-03/2020|EPI_ISL_430456|2020-03-21	1
England/CAMB-75491/2020|EPI_ISL_425393|2020-03-15					hCoV-19/England/NORW-E80C2/2020|EPI_ISL_449105|2020-04-08	D72H		hCoV-19/India/AR59/2020|EPI_ISL_508195|2020-06-03	1																						USA/MI-MDHHS-SC21051/2020|EPI_ISL_507827|2020-03-27	G172T		Japan/PG-0366/2020|EPI_ISL_480036|2020-03-24	1
USA/MI-MDHHS-SC20470/2020|EPI_ISL_460009|2020-03-29					hCoV-19/England/CAMB-7911E/2020|EPI_ISL_441130|2020-04-03	D72H		hCoV-19/Portugal/PT1129/2020|EPI_ISL_511676|2020-04-01	1																						USA/WA-UW-6490/2020|EPI_ISL_437847|2020-04-03	T174C		England/BRIS-1225F9/2020|EPI_ISL_440790|2020-04-04	1
USA/MI-MDHHS-SC20462/2020|EPI_ISL_460001|2020-03-30					hCoV-19/England/20126104604/2020|EPI_ISL_423916|2020-03-18	D72H		hCoV-19/USA/FL-BPHL-0448/2020|EPI_ISL_495354|2020-03-19	1																						Netherlands/NA_640/2020|EPI_ISL_461075|2020-05-03	T175C		Wales/PHWC-24FEB/2020|EPI_ISL_420928|2020-03-20	1
USA/MI-MDHHS-SC20332/2020|EPI_ISL_450611|2020-03-19					hCoV-19/England/CAMB-7B668/2020|EPI_ISL_441208|2020-04-04	D72H		hCoV-19/Scotland/EDB4658/2020|EPI_ISL_449317|2020-05-08	1																						Australia/NSW354/2020|EPI_ISL_451615|2020-04-17	T175C		England/BRIS-124A34/2020|EPI_ISL_443776|2020-03-25	1
England/LOND-D524A/2020|EPI_ISL_449693|2020-04-15					hCoV-19/England/CAMB-7C39D/2020|EPI_ISL_434035|2020-04-13	D72H		hCoV-19/Scotland/EDB788/2020|EPI_ISL_433244|2020-04-04	1																						Latvia/043/2020|EPI_ISL_492988|2020-06-30	T180C		England/NOTT-111BFB/2020|EPI_ISL_472384|2020-05-29	1
England/LOND-D51A7/2020|EPI_ISL_449684|2020-04-15					hCoV-19/England/20142014504/2020|EPI_ISL_423430|2020-03-31	D72H		hCoV-19/Wales/PHWC-323C0/2020|EPI_ISL_446641|2020-04-08	1																						Latvia/088/2020|EPI_ISL_512313|2020-06-17	T180C		Australia/VIC446/2020|EPI_ISL_426742|2020-03-27	1
England/LOND-D4CD4/2020|EPI_ISL_449676|2020-04-15					hCoV-19/France/HF2946/2020|EPI_ISL_420049|2020-03-19	D72G		hCoV-19/Algeria/G0638_2264/2020|EPI_ISL_418241|2020-03-02	1																						Latvia/092/2020|EPI_ISL_512647|2020-06-26	T180C		Wales/PHWC-2532A/2020|EPI_ISL_432231|2020-03-22	1
England/LOND-D3C20/2020|EPI_ISL_449643|2020-04-04					hCoV-19/England/CAMB-7D262/2020|EPI_ISL_442123|2020-04-06	D72H		hCoV-19/Netherlands/Flevoland_5/2020|EPI_ISL_460638|2020-04-01	1																						Japan/PG-0457/2020|EPI_ISL_480118|2020-03-27	C181T		England/BRIS-125426/2020|EPI_ISL_443981|2020-03-27	1
England/LIVE-9DD10/2020|EPI_ISL_449623|2020-04-30					hCoV-19/England/CAMB-7BA02/2020|EPI_ISL_442245|2020-04-04	D72H		hCoV-19/England/OXON-AF962/2020|EPI_ISL_478788|2020	1																						Philippines/RITM-03/2020|EPI_ISL_430456|2020-03-21	C181T		Netherlands/NA_94/2020|EPI_ISL_422854|2020-03-18	1
England/LIVE-9DADD/2020|EPI_ISL_449614|2020-04-29					hCoV-19/England/CAMB-792EE/2020|EPI_ISL_441203|2020-04-03	D72H		hCoV-19/Scotland/EDB787/2020|EPI_ISL_433243|2020-04-03	1																						Japan/PG-0366/2020|EPI_ISL_480036|2020-03-24	C181T		India/GBRC198/2020|EPI_ISL_469043|2020-06-08	1
England/LIVE-9D949/2020|EPI_ISL_449605|2020-04-27					hCoV-19/England/CAMB-794AC/2020|EPI_ISL_441133|2020-04-03	D72H		hCoV-19/USA/UT-01444/2020|EPI_ISL_452155|2020-04-10	1																						England/BRIS-1225F9/2020|EPI_ISL_440790|2020-04-04	G182A		USA/WA-UW-5011/2020|EPI_ISL_461433|2020-04-07	1
India/GBRC3/2020|EPI_ISL_435050|2020-04-13					hCoV-19/England/CAMB-7D772/2020|EPI_ISL_441657|2020-04-06	D72H		hCoV-19/England/OXON-AF2C1/2020|EPI_ISL_448823|2020-03-24	1																						Wales/PHWC-24FEB/2020|EPI_ISL_420928|2020-03-20	G182A		Sierra_Leone/KGH-G-8625/2020|EPI_ISL_512816|2020-04-10	1
USA/TX-HMH0423/2020|EPI_ISL_435006|2020-04-01					hCoV-19/India/AR59/2020|EPI_ISL_508195|2020-06-03	D72V		hCoV-19/Scotland/EDB1897/2020|EPI_ISL_433156|2020-04-17	1																						England/BRIS-124A34/2020|EPI_ISL_443776|2020-03-25	G182A		Sierra_Leone/KGH-G-8790/2020|EPI_ISL_512821|2020-04-27	1
England/NOTT-10EB88/2020|EPI_ISL_425646|2020-03-12					hCoV-19/Portugal/PT1129/2020|EPI_ISL_511676|2020-04-01	D72A		hCoV-19/England/OXON-AE5F6/2020|EPI_ISL_448706|2020	1																						England/NOTT-111BFB/2020|EPI_ISL_472384|2020-05-29	G182A		Sierra_Leone/KGH-G-8668/2020|EPI_ISL_512819|2020-04-11	1
England/NOTT-10EAB8/2020|EPI_ISL_425636|2020-03-30					hCoV-19/USA/FL-BPHL-0448/2020|EPI_ISL_495354|2020-03-19	D72Y		hCoV-19/England/OXON-ADF44/2020|EPI_ISL_448648|2020	1																						Australia/VIC446/2020|EPI_ISL_426742|2020-03-27	G182T		USA/WA-S2336/2020|EPI_ISL_496968|2020-06-11	1
England/NOTT-10EA21/2020|EPI_ISL_425627|2020-03-29					hCoV-19/Scotland/EDB4658/2020|EPI_ISL_449317|2020-05-08	L73F		hCoV-19/USA/WI-WSLH-200052/2020|EPI_ISL_471217|2020-04-06	1																						Wales/PHWC-2532A/2020|EPI_ISL_432231|2020-03-22	G182A		USA/WA-S2020/2020|EPI_ISL_497448|2020-06-05	1
England/NOTT-10E951/2020|EPI_ISL_425616|2020-03-30					hCoV-19/Scotland/EDB788/2020|EPI_ISL_433244|2020-04-04	L73F		hCoV-19/Netherlands/NA_688/2020|EPI_ISL_461123|2020-03-30	1																						England/BRIS-125426/2020|EPI_ISL_443981|2020-03-27	G182A		USA/WA-S1811/2020|EPI_ISL_496237|2020-06-02	1
England/NOTT-10E890/2020|EPI_ISL_425605|2020-03-25					hCoV-19/Wales/PHWC-323C0/2020|EPI_ISL_446641|2020-04-08	L73F		hCoV-19/Netherlands/Utrecht_44/2020|EPI_ISL_461242|2020-04-07	1																						Netherlands/NA_94/2020|EPI_ISL_422854|2020-03-18	G184T		USA/MD-MDH-0085/2020|EPI_ISL_509489|2020-05-26	1
Wales/PHWC-365D5/2020|EPI_ISL_474687|2020-04-30					hCoV-19/Algeria/G0638_2264/2020|EPI_ISL_418241|2020-03-02	L73F		hCoV-19/Scotland/EDB2561/2020|EPI_ISL_439230|2020-04-24	1																						India/GBRC198/2020|EPI_ISL_469043|2020-06-08	G184T		USA/WA-S1809/2020|EPI_ISL_496235|2020-06-02	1
Wales/PHWC-3621A/2020|EPI_ISL_474637|2020-04-28					hCoV-19/Netherlands/Flevoland_5/2020|EPI_ISL_460638|2020-04-01	L73F		hCoV-19/Scotland/EDB1622/2020|EPI_ISL_433092|2020-04-13	1																						USA/WA-UW-5011/2020|EPI_ISL_461433|2020-04-07	G184T		USA/WA-S1602/2020|EPI_ISL_496028|2020-05-26	1
Canada/QC-AK7/2020|EPI_ISL_450644|2020-04-08					hCoV-19/England/OXON-AF962/2020|EPI_ISL_478788|2020	L73F		hCoV-19/Scotland/EDB1677/2020|EPI_ISL_433114|2020-04-15	1																						Sierra_Leone/KGH-G-8625/2020|EPI_ISL_512816|2020-04-10	G184T		USA/MD-MDH-0086/2020|EPI_ISL_509490|2020-05-26	1
USA/MI-MDHHS-SC20357/2020|EPI_ISL_450636|2020-03-30					hCoV-19/Scotland/EDB787/2020|EPI_ISL_433243|2020-04-03	L73F		hCoV-19/Iceland/243/2020|EPI_ISL_417571|2020-03-17	1																						Sierra_Leone/KGH-G-8790/2020|EPI_ISL_512821|2020-04-27	G184T		USA/WA-S2444/2020|EPI_ISL_497076|2020-06-16	1
England/LOND-D4C6B/2020|EPI_ISL_449669|2020-04-15					hCoV-19/USA/UT-01444/2020|EPI_ISL_452155|2020-04-10	L73F		hCoV-19/USA/UT-01314/2020|EPI_ISL_449812|2020-04-01	1																						Sierra_Leone/KGH-G-8668/2020|EPI_ISL_512819|2020-04-11	G184T		USA/WA-S1824/2020|EPI_ISL_496250|2020-06-02	1
England/LOND-D4BE6/2020|EPI_ISL_449661|2020-04-14					hCoV-19/England/OXON-AF2C1/2020|EPI_ISL_448823|2020-03-24	L73F		hCoV-19/Australia/VIC275/2020|EPI_ISL_419968|2020-03-22	1																						USA/WA-S2336/2020|EPI_ISL_496968|2020-06-11	G184T		Scotland/EDB2272/2020|EPI_ISL_491531|2020-04-21	1
England/LOND-D3DB4/2020|EPI_ISL_449653|2020-04-04					hCoV-19/Scotland/EDB1897/2020|EPI_ISL_433156|2020-04-17	L73F		hCoV-19/India/NIV-QA-709/2020|EPI_ISL_452214|2020-04-07	1																						USA/WA-S2020/2020|EPI_ISL_497448|2020-06-05	G184T		Sierra_Leone/KGH-G-8626/2020|EPI_ISL_512817|2020-04-10	1
England/LOND-D3BBA/2020|EPI_ISL_449636|2020-04-04					hCoV-19/England/OXON-AE5F6/2020|EPI_ISL_448706|2020	L73F		hCoV-19/England/BRIS-122025/2020|EPI_ISL_440038|2020-03-20	1																						USA/WA-S1811/2020|EPI_ISL_496237|2020-06-02	G184T		USA/WA-UW-12149/2020|EPI_ISL_501107|2020-06-25	1
England/LOND-D3B14/2020|EPI_ISL_449627|2020-04-04					hCoV-19/England/OXON-ADF44/2020|EPI_ISL_448648|2020	L73F		hCoV-19/Austria/CeMM0321/2020|EPI_ISL_475792|2020-03-31	1																						USA/MD-MDH-0085/2020|EPI_ISL_509489|2020-05-26	G184T		USA/MD-MDH-0084/2020|EPI_ISL_509488|2020-05-25	1
USA/TX-HMH0439/2020|EPI_ISL_435022|2020-04-02					hCoV-19/USA/WI-WSLH-200052/2020|EPI_ISL_471217|2020-04-06	L73F		hCoV-19/Netherlands/Gelderland_50/2020|EPI_ISL_460950|2020-05-17	1																						USA/WA-S1809/2020|EPI_ISL_496235|2020-06-02	G184T		USA/WA-S2021/2020|EPI_ISL_497449|2020-06-05	1
USA/TX-HMH0431/2020|EPI_ISL_435014|2020-04-02					hCoV-19/Netherlands/NA_688/2020|EPI_ISL_461123|2020-03-30	L73F		hCoV-19/Netherlands/NoordBrabant_146/2020|EPI_ISL_461181|2020-04-05	1																						USA/WA-S1602/2020|EPI_ISL_496028|2020-05-26	G184T		USA/WA-S1309/2020|EPI_ISL_495759|2020-05-14	1
Wales/PHWC-36362/2020|EPI_ISL_474656|2020-04-29					hCoV-19/Netherlands/Utrecht_44/2020|EPI_ISL_461242|2020-04-07	L73F		hCoV-19/USA/NE-10760/2020|EPI_ISL_475178|2020-05-04	1																						USA/MD-MDH-0086/2020|EPI_ISL_509490|2020-05-26	G184T		USA/WA-S1803/2020|EPI_ISL_496229|2020-06-02	1
USA/MI-MDHHS-SC20498/2020|EPI_ISL_460036|2020-05-11					hCoV-19/Scotland/EDB2561/2020|EPI_ISL_439230|2020-04-24	L73F		hCoV-19/England/CAMB-71C60/2020|EPI_ISL_439607|2020-03-31	1																						USA/WA-S2444/2020|EPI_ISL_497076|2020-06-16	G184T		USA/WA-S1980/2020|EPI_ISL_497408|2020-06-03	1
USA/MI-MDHHS-SC20488/2020|EPI_ISL_460027|2020-04-01					hCoV-19/Scotland/EDB1622/2020|EPI_ISL_433092|2020-04-13	L73F		hCoV-19/Netherlands/NA_686/2020|EPI_ISL_461121|2020-04-08	1																						USA/WA-S1824/2020|EPI_ISL_496250|2020-06-02	G184T		USA/WA-S2232/2020|EPI_ISL_497660|2020-06-09	1
USA/MI-MDHHS-SC20478/2020|EPI_ISL_460017|2020-03-31					hCoV-19/Scotland/EDB1677/2020|EPI_ISL_433114|2020-04-15	L73F		hCoV-19/Scotland/EDB2357/2020|EPI_ISL_439187|2020-04-22	1																						Scotland/EDB2272/2020|EPI_ISL_491531|2020-04-21	G184T		USA/WA-S2319/2020|EPI_ISL_496951|2020-06-11	1
England/NOTT-10E441/2020|EPI_ISL_425546|2020-03-23					hCoV-19/Iceland/243/2020|EPI_ISL_417571|2020-03-17	L73F		hCoV-19/England/OXON-B0D62/2020|EPI_ISL_478961|2020	1																						Sierra_Leone/KGH-G-8669/2020|EPI_ISL_512820|2020-04-14	G184T		USA/WA-S1807/2020|EPI_ISL_496233|2020-06-02	1
England/NOTT-10E3BD/2020|EPI_ISL_425537|2020-03-21					hCoV-19/USA/UT-01314/2020|EPI_ISL_449812|2020-04-01	L73F		hCoV-19/England/OXON-AE59C/2020|EPI_ISL_448703|2020	1																						Sierra_Leone/KGH-G-8626/2020|EPI_ISL_512817|2020-04-10	G184T		USA/WA-S1793/2020|EPI_ISL_496219|2020-06-02	1
England/NOTT-10E326/2020|EPI_ISL_425529|2020-03-21					hCoV-19/Australia/VIC275/2020|EPI_ISL_419968|2020-03-22	L73F		hCoV-19/England/OXON-AD991/2020|EPI_ISL_448606|2020	1																						USA/WA-UW-12149/2020|EPI_ISL_501107|2020-06-25	G184T		USA/WA-S1688/2020|EPI_ISL_496114|2020-05-30	1
Wales/PHWC-35A9B/2020|EPI_ISL_474521|2020-04-23					hCoV-19/India/NIV-QA-709/2020|EPI_ISL_452214|2020-04-07	L73F		hCoV-19/Australia/VIC873/2020|EPI_ISL_427128|2020-04-05	1																						USA/MD-MDH-0084/2020|EPI_ISL_509488|2020-05-25	G184T		USA/WA-S1892/2020|EPI_ISL_496318|2020-05-28	1
USA/UT-01237/2020|EPI_ISL_450561|2020-04-09					hCoV-19/England/BRIS-122025/2020|EPI_ISL_440038|2020-03-20	L73F		hCoV-19/England/OXON-B151E/2020|EPI_ISL_479024|2020	1																						USA/WA-S2021/2020|EPI_ISL_497449|2020-06-05	G184T		USA/WA-S2201/2020|EPI_ISL_497629|2020-06-08	1
Latvia/018/2020|EPI_ISL_450518|2020-04-18					hCoV-19/Austria/CeMM0321/2020|EPI_ISL_475792|2020-03-31	L73F		hCoV-19/Bulgaria/15/2020|EPI_ISL_480298|2020-05-13	1																						USA/WA-S1309/2020|EPI_ISL_495759|2020-05-14	G184T		USA/WA-S1948/2020|EPI_ISL_497376|2020-06-03	1
England/NOTT-10E827/2020|EPI_ISL_425599|2020-03-24					hCoV-19/Netherlands/Gelderland_50/2020|EPI_ISL_460950|2020-05-17	L73F		hCoV-19/France/IDF3345/2020|EPI_ISL_421513|2020-03-23	1																						USA/WA-S1803/2020|EPI_ISL_496229|2020-06-02	G184T		USA/WA-S1674/2020|EPI_ISL_496100|2020-05-29	1
England/NOTT-10E757/2020|EPI_ISL_425588|2020-03-24					hCoV-19/Netherlands/NoordBrabant_146/2020|EPI_ISL_461181|2020-04-05	L73F		hCoV-19/Vietnam/HCMC-35011/2020|EPI_ISL_450740|2020-03-30	1																						USA/WA-S1980/2020|EPI_ISL_497408|2020-06-03	G184T		USA/WA-S1675/2020|EPI_ISL_496101|2020-05-29	1
England/NOTT-10E696/2020|EPI_ISL_425577|2020-03-24					hCoV-19/USA/NE-10760/2020|EPI_ISL_475178|2020-05-04	L73F		hCoV-19/Australia/VIC1092/2020|EPI_ISL_430582|2020-04-07	1																						USA/WA-S2232/2020|EPI_ISL_497660|2020-06-09	G184T		USA/WA-S2200/2020|EPI_ISL_497628|2020-06-08	1
England/NOTT-10E5D5/2020|EPI_ISL_425568|2020-03-22					hCoV-19/England/CAMB-71C60/2020|EPI_ISL_439607|2020-03-31	L73F		hCoV-19/Scotland/EDB067/2020|EPI_ISL_425866|2020-03-19	1																						USA/WA-S2319/2020|EPI_ISL_496951|2020-06-11	G184T		USA/MD-MDH-0087/2020|EPI_ISL_509491|2020-05-26	1
England/NOTT-10E511/2020|EPI_ISL_425558|2020-03-23					hCoV-19/Netherlands/NA_686/2020|EPI_ISL_461121|2020-04-08	L73F		hCoV-19/Scotland/EDB4488/2020|EPI_ISL_449311|2020-05-05	1																						USA/WA-S1807/2020|EPI_ISL_496233|2020-06-02	G184T		USA/WA-S2329/2020|EPI_ISL_496961|2020-06-10	1
England/NOTT-10E46F/2020|EPI_ISL_425548|2020-03-22					hCoV-19/Scotland/EDB2357/2020|EPI_ISL_439187|2020-04-22	L73F		hCoV-19/Scotland/EDB5349/2020|EPI_ISL_457005|2020-05-23	1																						USA/WA-S1793/2020|EPI_ISL_496219|2020-06-02	G184T		USA/WA-S2267/2020|EPI_ISL_497695|2020-06-09	1
England/NOTT-10E265/2020|EPI_ISL_425518|2020-03-20					hCoV-19/England/OXON-B0D62/2020|EPI_ISL_478961|2020	L73F		hCoV-19/Scotland/EDB2081/2020|EPI_ISL_433180|2020-04-19	1																						USA/WA-S1688/2020|EPI_ISL_496114|2020-05-30	G184T		USA/FL-QDX-226/2020|EPI_ISL_498707|2020-04-16	1
England/NOTT-10E12C/2020|EPI_ISL_425501|2020-03-15					hCoV-19/England/OXON-AE59C/2020|EPI_ISL_448703|2020	L73F		hCoV-19/Scotland/EDB1694/2020|EPI_ISL_433119|2020-04-15	1																						USA/WA-S1892/2020|EPI_ISL_496318|2020-05-28	G184T		Lebanon/S6_766/2020|EPI_ISL_450513|2020-03-09	1
USA/OR-PROV-171/2020|EPI_ISL_482422|2020-05-11					hCoV-19/England/OXON-AD991/2020|EPI_ISL_448606|2020	L73F		hCoV-19/Scotland/EDB1646/2020|EPI_ISL_433103|2020-04-14	1																						USA/WA-S2201/2020|EPI_ISL_497629|2020-06-08	G184T		England/BRIS-12D594/2020|EPI_ISL_481826|2020-05-05	1
USA/OR-PROV-159/2020|EPI_ISL_482414|2020-05-06					hCoV-19/Australia/VIC873/2020|EPI_ISL_427128|2020-04-05	L73F		hCoV-19/England/NOTT-11086E/2020|EPI_ISL_441868|2020-04-28	1																						USA/WA-S1948/2020|EPI_ISL_497376|2020-06-03	G184T		USA/NY-WCMP12E06P/2020|EPI_ISL_427607|2020-03-16	1
USA/OR-PROV-147/2020|EPI_ISL_482405|2020-05-02					hCoV-19/England/OXON-B151E/2020|EPI_ISL_479024|2020	L73F		hCoV-19/England/NORT-2984E1/2020|EPI_ISL_488012|2020-04-23	1																						USA/WA-S1674/2020|EPI_ISL_496100|2020-05-29	G184T		USA/VA-DCLS-0547/2020|EPI_ISL_485848|2020-03-15	1
Wales/PHWC-35DED/2020|EPI_ISL_474572|2020-04-27					hCoV-19/Bulgaria/15/2020|EPI_ISL_480298|2020-05-13	L73F		hCoV-19/Denmark/ALAB-SSI481/2020|EPI_ISL_429560|2020-03-25	1																						USA/WA-S1675/2020|EPI_ISL_496101|2020-05-29	G184T		England/CAMB-1ABBBA/2020|EPI_ISL_470122|2020-04-20	1
England/NORW-EBB64/2020|EPI_ISL_457482|2020-05-06					hCoV-19/France/IDF3345/2020|EPI_ISL_421513|2020-03-23	L73F		hCoV-19/Scotland/EDB4861/2020|EPI_ISL_478191|2020-05-11	1																						USA/WA-S2200/2020|EPI_ISL_497628|2020-06-08	G184T		USA/CA-QDX-158/2020|EPI_ISL_467820|2020-03-16	1
USA/MI-MDHHS-SC20384/2020|EPI_ISL_450595|2020-03-24					hCoV-19/Vietnam/HCMC-35011/2020|EPI_ISL_450740|2020-03-30	L73F		hCoV-19/Denmark/ALAB-HH42/2020|EPI_ISL_429298|2020-03-15	1																						USA/MD-MDH-0087/2020|EPI_ISL_509491|2020-05-26	G184T		USA/NY-NYUMC58/2020|EPI_ISL_420573|2020-03-18	1
USA/MI-MDHHS-SC20376/2020|EPI_ISL_450587|2020-03-15					hCoV-19/Australia/VIC1092/2020|EPI_ISL_430582|2020-04-07	L73F		hCoV-19/Australia/NSW150/2020|EPI_ISL_427796|2020-03-19	1																						USA/WA-S2329/2020|EPI_ISL_496961|2020-06-10	G184T		USA/FL-Miami-04_UMTL-96NV/2020|EPI_ISL_479760|2020-04-06	1
USA/MI-MDHHS-SC20363/2020|EPI_ISL_450574|2020-03-14					hCoV-19/Scotland/EDB067/2020|EPI_ISL_425866|2020-03-19	L73F		hCoV-19/Scotland/EDB2518/2020|EPI_ISL_439223|2020-04-23	1																						USA/WA-S2267/2020|EPI_ISL_497695|2020-06-09	G184T		USA/NY-NYUMC41/2020|EPI_ISL_419702|2020-03-18	1
England/CAMB-7FC08/2020|EPI_ISL_433491|2020-04-16					hCoV-19/Scotland/EDB4488/2020|EPI_ISL_449311|2020-05-05	L73F		hCoV-19/Scotland/EDB3598/2020|EPI_ISL_439296|2020-04-27	1																						USA/FL-QDX-226/2020|EPI_ISL_498707|2020-04-16	G184T		USA/FL-BPHL-0130/2020|EPI_ISL_450864|2020-04-11	1
England/CAMB-7FB74/2020|EPI_ISL_433483|2020-04-17					hCoV-19/Scotland/EDB5349/2020|EPI_ISL_457005|2020-05-23	L73F		hCoV-19/Scotland/EDB1717/2020|EPI_ISL_433127|2020-04-15	1																						Lebanon/S6_766/2020|EPI_ISL_450513|2020-03-09	T185A		USA/CT-UW-2462/2020|EPI_ISL_485920|2020-03-29	1
England/CAMB-7E2DA/2020|EPI_ISL_433466|2020-04-17					hCoV-19/Scotland/EDB2081/2020|EPI_ISL_433180|2020-04-19	L73F		hCoV-19/Iceland/333/2020|EPI_ISL_417662|2020-03-14	1																						England/BRIS-12D594/2020|EPI_ISL_481826|2020-05-05	T186C		USA/NJ-QDX-56/2020|EPI_ISL_467882|2020-03-14	1
Scotland/EDB1463/2020|EPI_ISL_433458|2020-04-11					hCoV-19/Scotland/EDB1694/2020|EPI_ISL_433119|2020-04-15	L73F		hCoV-19/England/20166058104/2020|EPI_ISL_466555|2020-04-16	1																						USA/NY-WCMP12E06P/2020|EPI_ISL_427607|2020-03-16	A189G		USA/LA-SR0264/2020|EPI_ISL_445119|2020-03-31	1
Scotland/EDB1447/2020|EPI_ISL_433450|2020-04-13					hCoV-19/Scotland/EDB1646/2020|EPI_ISL_433103|2020-04-14	L73F		hCoV-19/Iceland/247/2020|EPI_ISL_417575|2020-03-17	1																						USA/VA-DCLS-0547/2020|EPI_ISL_485848|2020-03-15	A189G		USA/CT-UW-4343/2020|EPI_ISL_430944|2020-03-30	1
Bangladesh/BCSIR-NILMRC_160/2020|EPI_ISL_482486|2020-06-18					hCoV-19/England/NOTT-11086E/2020|EPI_ISL_441868|2020-04-28	L73V		hCoV-19/Wales/PHWC-2EE6C/2020|EPI_ISL_446164|2020-04-06	1																						England/CAMB-1ABBBA/2020|EPI_ISL_470122|2020-04-20	A189G		USA/WA-UW-2245/2020|EPI_ISL_426128|2020-03-25	1
USA/OR-PROV-226/2020|EPI_ISL_482461|2020-04-07					hCoV-19/England/NORT-2984E1/2020|EPI_ISL_488012|2020-04-23	L73F		hCoV-19/Scotland/EDB4859/2020|EPI_ISL_478190|2020-05-11	1																						USA/CA-QDX-158/2020|EPI_ISL_467820|2020-03-16	A189G		USA/CA-ALSR-0788-SAN/2020|EPI_ISL_483358|2020-04-07	1
USA/OR-PROV-218/2020|EPI_ISL_482453|2020-04-04					hCoV-19/Denmark/ALAB-SSI481/2020|EPI_ISL_429560|2020-03-25	L73F		hCoV-19/Netherlands/Limburg_26/2020|EPI_ISL_461014|2020-04-19	1																						USA/NY-NYUMC58/2020|EPI_ISL_420573|2020-03-18	A189G		USA/FL-Miami-05_UMTL-9TXV/2020|EPI_ISL_479764|2020-05-21	1
USA/OR-PROV-203/2020|EPI_ISL_482445|2020-05-10					hCoV-19/Scotland/EDB4861/2020|EPI_ISL_478191|2020-05-11	L73F		hCoV-19/DRC/998/2020|EPI_ISL_429254|2020-04-03	1																						USA/FL-Miami-04_UMTL-96NV/2020|EPI_ISL_479760|2020-04-06	A189G		Sweden/20-08681/2020|EPI_ISL_429129|2020-03-27	1
USA/OR-PROV-192/2020|EPI_ISL_482437|2020-05-16					hCoV-19/Denmark/ALAB-HH42/2020|EPI_ISL_429298|2020-03-15	L73F		hCoV-19/South_Africa/R12726-20/2020|EPI_ISL_504244|2020-06-16	1																						USA/NY-NYUMC41/2020|EPI_ISL_419702|2020-03-18	A189G		USA/CA-ALSR-0518-SAN/2020|EPI_ISL_483197|2020-04-01	1
Wales/PHWC-16054A/2020|EPI_ISL_472948|2020-04-28					hCoV-19/Australia/NSW150/2020|EPI_ISL_427796|2020-03-19	L73F		hCoV-19/South_Africa/R12692-20/2020|EPI_ISL_504228|2020-06-16	1																						USA/FL-BPHL-0130/2020|EPI_ISL_450864|2020-04-11	A189G		USA/FL-BPHL-0068/2020|EPI_ISL_445011|2020-04-17	1
England/NORW-EAB56/2020|EPI_ISL_457356|2020-05-08					hCoV-19/Scotland/EDB2518/2020|EPI_ISL_439223|2020-04-23	L73F		hCoV-19/Costa_Rica/INC-0033/2020|EPI_ISL_491445|2020-03-15	1																						USA/CT-UW-2462/2020|EPI_ISL_485920|2020-03-29	A189G		Australia/WA56/2020|EPI_ISL_470873|2020-03-24	1
Scotland/CVR1123/2020|EPI_ISL_433512|2020-03-30					hCoV-19/Scotland/EDB3598/2020|EPI_ISL_439296|2020-04-27	L73F		hCoV-19/Costa_Rica/INC-0032/2020|EPI_ISL_491444|2020-03-15	1																						USA/NJ-QDX-56/2020|EPI_ISL_467882|2020-03-14	A189G		USA/NY-NYUMC746/2020|EPI_ISL_451461|2020-03-26	1
England/CAMB-7E322/2020|EPI_ISL_433471|2020-04-17					hCoV-19/Scotland/EDB1717/2020|EPI_ISL_433127|2020-04-15	L73F		hCoV-19/Scotland/EDB1303/2020|EPI_ISL_491584|2020-04-09	1																						USA/LA-SR0264/2020|EPI_ISL_445119|2020-03-31	A189G		USA/NY-SURV0985/2020|EPI_ISL_436079|2020-03-19	1
Scotland/EDB1076/2020|EPI_ISL_433384|2020-04-07					hCoV-19/Iceland/333/2020|EPI_ISL_417662|2020-03-14	L73F		hCoV-19/Scotland/EDB2254/2020|EPI_ISL_491542|2020-04-21	1																						Australia/SAP327/2020|EPI_ISL_483105|2020-03-27	A189G		USA/OH-OSUP0112/2020|EPI_ISL_421675|2020-04-01	1
Scotland/EDB1037/2020|EPI_ISL_433376|2020-04-06					hCoV-19/England/20166058104/2020|EPI_ISL_466555|2020-04-16	L73F		hCoV-19/Scotland/EDB1835/2020|EPI_ISL_491628|2020-04-16	1																						USA/CT-UW-4343/2020|EPI_ISL_430944|2020-03-30	A189G		USA/MN-MDH-301/2020|EPI_ISL_450768|2020-03-30	1
USA/OR-PROV-068/2020|EPI_ISL_482346|2020-04-14					hCoV-19/Iceland/247/2020|EPI_ISL_417575|2020-03-17	L73F		hCoV-19/Scotland/EDB1899/2020|EPI_ISL_491625|2020-04-17	1																						USA/WA-UW-2245/2020|EPI_ISL_426128|2020-03-25	A189G		USA/FL-BPHL-0062/2020|EPI_ISL_445005|2020-04-15	1
USA/OR-PROV-058/2020|EPI_ISL_482338|2020-04-12					hCoV-19/Wales/PHWC-2EE6C/2020|EPI_ISL_446164|2020-04-06	L73F		hCoV-19/England/BRIS-123F54/2020|EPI_ISL_492827|2020-04-08	1																						USA/CA-ALSR-0788-SAN/2020|EPI_ISL_483358|2020-04-07	A189G		Australia/NSW268/2020|EPI_ISL_451533|2020-03-30	1
USA/OR-PROV-048/2020|EPI_ISL_482329|2020-03-23					hCoV-19/Scotland/EDB4859/2020|EPI_ISL_478190|2020-05-11	L73F		hCoV-19/Scotland/EDB2122/2020|EPI_ISL_491684|2020-04-20	1																						USA/FL-Miami-05_UMTL-9TXV/2020|EPI_ISL_479764|2020-05-21	A189G		USA/NY-NYUMC620/2020|EPI_ISL_444737|2020-04-02	1
USA/OR-PROV-039/2020|EPI_ISL_482321|2020-03-27					hCoV-19/Netherlands/Limburg_26/2020|EPI_ISL_461014|2020-04-19	L73F		hCoV-19/England/BRIS-1854196/2020|EPI_ISL_492408|2020-04-28	1																						Sweden/20-08681/2020|EPI_ISL_429129|2020-03-27	A189G		USA/NY-NYUMC258/2020|EPI_ISL_428772|2020-04-05	1
USA/OR-PROV-030/2020|EPI_ISL_482313|2020-03-23					hCoV-19/DRC/998/2020|EPI_ISL_429254|2020-04-03	L73F		hCoV-19/SaudiArabia/KAUST-JEDDAH1008/2020|EPI_ISL_512879|2020-06-17	1																						USA/CA-ALSR-0518-SAN/2020|EPI_ISL_483197|2020-04-01	A189G		USA/FL-BPHL-0092/2020|EPI_ISL_445035|2020-04-28	1
USA/OR-PROV-018/2020|EPI_ISL_482305|2020-04-06					hCoV-19/South_Africa/R12726-20/2020|EPI_ISL_504244|2020-06-16	L73F		hCoV-19/South_Africa/R12646-20/2020|EPI_ISL_504206|2020-06-16	1																						USA/FL-BPHL-0068/2020|EPI_ISL_445011|2020-04-17	A189G		USA/FL-BPHL-0090/2020|EPI_ISL_445033|2020-04-28	1
Wales/PHWC-160911/2020|EPI_ISL_472993|2020-05-19					hCoV-19/South_Africa/R12692-20/2020|EPI_ISL_504228|2020-06-16	L73F		hCoV-19/South_Africa/R12707-20/2020|EPI_ISL_504235|2020-06-16	1																						Australia/WA56/2020|EPI_ISL_470873|2020-03-24	A189G		England/CAMB-1ABBD8/2020|EPI_ISL_470300|2020-04-20	1
Wales/PHWC-1606ED/2020|EPI_ISL_472967|2020-04-22					hCoV-19/Costa_Rica/INC-0033/2020|EPI_ISL_491445|2020-03-15	L73F		hCoV-19/South_Africa/R12658-20/2020|EPI_ISL_504212|2020-06-16	1																						USA/NY-NYUMC746/2020|EPI_ISL_451461|2020-03-26	A189G		England/CAMB-8117D/2020|EPI_ISL_438574|2020-04-20	1
Wales/PHWC-160252/2020|EPI_ISL_472912|2020-05-19					hCoV-19/Costa_Rica/INC-0032/2020|EPI_ISL_491444|2020-03-15	L73F		hCoV-19/South_Africa/R12672-20/2020|EPI_ISL_504219|2020-06-16	1																						USA/NY-SURV0985/2020|EPI_ISL_436079|2020-03-19	A189G		USA/NY-NYUMC116/2020|EPI_ISL_421728|2020-03-18	1
England/NORT-292317/2020|EPI_ISL_457320|2020-05-09					hCoV-19/Scotland/EDB1303/2020|EPI_ISL_491584|2020-04-09	L73F		hCoV-19/England/BRIS-130103/2020|EPI_ISL_492538|2020-04-11	1																						USA/OH-OSUP0112/2020|EPI_ISL_421675|2020-04-01	A189G		USA/CT-UW256/2020|EPI_ISL_418041|2020-03-14	1
England/NORT-28B38A/2020|EPI_ISL_457312|2020-05-04					hCoV-19/Scotland/EDB2254/2020|EPI_ISL_491542|2020-04-21	L73F		hCoV-19/Scotland/EDB2537/2020|EPI_ISL_491547|2020-04-24	1																						USA/MN-MDH-301/2020|EPI_ISL_450768|2020-03-30	A189G		USA/NY-WCMP11E04P/2020|EPI_ISL_427592|2020-03-16	1
England/NORT-28A4B5/2020|EPI_ISL_457304|2020-04-11					hCoV-19/Scotland/EDB1835/2020|EPI_ISL_491628|2020-04-16	L73F		hCoV-19/Scotland/EDB1400/2020|EPI_ISL_491495|2020-04-12	1																						USA/FL-BPHL-0062/2020|EPI_ISL_445005|2020-04-15	A189G		USA/FL-BPHL-0089/2020|EPI_ISL_445032|2020-04-28	1
England/CAMB-1AD6A8/2020|EPI_ISL_447994|2020-05-01					hCoV-19/Scotland/EDB1899/2020|EPI_ISL_491625|2020-04-17	L73F		hCoV-19/Scotland/EDB1125/2020|EPI_ISL_491528|2020-04-07	1																						Australia/NSW268/2020|EPI_ISL_451533|2020-03-30	A189G		USA/CA-ALSR-0616-SAN/2020|EPI_ISL_483260|2020-04-07	1
England/CAMB-1AD2B3/2020|EPI_ISL_447986|2020					hCoV-19/England/BRIS-123F54/2020|EPI_ISL_492827|2020-04-08	L73F		hCoV-19/Scotland/EDB2117/2020|EPI_ISL_491517|2020-04-20	1																						USA/NY-NYUMC620/2020|EPI_ISL_444737|2020-04-02	A189G		USA/FL-BPHL-0091/2020|EPI_ISL_445034|2020-04-28	1
England/CAMB-1AD1E3/2020|EPI_ISL_447977|2020-04-28					hCoV-19/Scotland/EDB2122/2020|EPI_ISL_491684|2020-04-20	L73F		hCoV-19/Scotland/EDB2356/2020|EPI_ISL_491673|2020-04-22	1																						USA/NY-NYUMC258/2020|EPI_ISL_428772|2020-04-05	A189G		USA/FL-BPHL-0131/2020|EPI_ISL_450865|2020-04-11	1
England/CAMB-1AD12F/2020|EPI_ISL_447968|2020-04-27					hCoV-19/England/BRIS-1854196/2020|EPI_ISL_492408|2020-04-28	L73F		hCoV-19/Scotland/EDB1252/2020|EPI_ISL_491666|2020-04-09	1																						USA/FL-BPHL-0092/2020|EPI_ISL_445035|2020-04-28	A189G		USA/CA-QDX-159/2020|EPI_ISL_467821|2020-03-16	1
Scotland/EDB1101/2020|EPI_ISL_433394|2020-04-07					hCoV-19/SaudiArabia/KAUST-JEDDAH1008/2020|EPI_ISL_512879|2020-06-17	L73F		hCoV-19/Costa_Rica/INC-0029/2020|EPI_ISL_491441|2020-03-14	1																						USA/FL-BPHL-0090/2020|EPI_ISL_445033|2020-04-28	A189G		USA/VA-DCLS-0683/2020|EPI_ISL_500845|2020-04-18	1
Scotland/CVR754/2020|EPI_ISL_433335|2020-03-26					hCoV-19/South_Africa/R12646-20/2020|EPI_ISL_504206|2020-06-16	L73F		hCoV-19/Panama/336085/2020|EPI_ISL_496837|2020-04-03	1																						England/CAMB-1ABBD8/2020|EPI_ISL_470300|2020-04-20	A189G		USA/WI-UW-835/2020|EPI_ISL_509842|2020-05-22	1
USA/OR-PROV-132/2020|EPI_ISL_482395|2020-05-01					hCoV-19/South_Africa/R12707-20/2020|EPI_ISL_504235|2020-06-16	L73F		hCoV-19/South_Africa/R12678-20/2020|EPI_ISL_504220|2020-06-16	1																						England/CAMB-8117D/2020|EPI_ISL_438574|2020-04-20	A189G		Belize/CDC-6851/2020|EPI_ISL_509713|2020-03-27	1
USA/OR-PROV-121/2020|EPI_ISL_482385|2020-04-27					hCoV-19/South_Africa/R12658-20/2020|EPI_ISL_504212|2020-06-16	L73F		hCoV-19/South_Africa/R12705-20/2020|EPI_ISL_504234|2020-06-16	1																						USA/NY-NYUMC116/2020|EPI_ISL_421728|2020-03-18	A189G		North_Macedonia/ChVir7908/2020|EPI_ISL_492079|2020-06-26	1
USA/OR-PROV-108/2020|EPI_ISL_482376|2020-04-23					hCoV-19/South_Africa/R12672-20/2020|EPI_ISL_504219|2020-06-16	L73F		hCoV-19/South_Africa/R12656-20/2020|EPI_ISL_504211|2020-06-16	1																						USA/CT-UW256/2020|EPI_ISL_418041|2020-03-14	A189G		Senegal/62872/2020|EPI_ISL_476494|2020-06-11	1
USA/OR-PROV-096/2020|EPI_ISL_482367|2020-04-21					hCoV-19/England/BRIS-130103/2020|EPI_ISL_492538|2020-04-11	L73F		hCoV-19/South_Africa/R12670-20/2020|EPI_ISL_504218|2020-06-16	1																						USA/NY-WCMP11E04P/2020|EPI_ISL_427592|2020-03-16	A189G		Senegal/62184/2020|EPI_ISL_498245|2020-06-09	1
USA/OR-PROV-086/2020|EPI_ISL_482357|2020-04-19					hCoV-19/Scotland/EDB2537/2020|EPI_ISL_491547|2020-04-24	L73F		hCoV-19/South_Africa/R12711-20/2020|EPI_ISL_504238|2020-06-16	1																						USA/FL-BPHL-0089/2020|EPI_ISL_445032|2020-04-28	A189G		Spain/CM-003913/2020|EPI_ISL_500218|2020-04-28	1
India/GBRC180a/2020|EPI_ISL_467047|2020-06-03					hCoV-19/Scotland/EDB1400/2020|EPI_ISL_491495|2020-04-12	L73F		hCoV-19/Malaysia/3611/2020|EPI_ISL_501207|2020-03-31	1																						USA/CA-ALSR-0616-SAN/2020|EPI_ISL_483260|2020-04-07	A189G		Spain/Valencia83/2020|EPI_ISL_425207|2020-03-21	1
India/GBRC175/2020|EPI_ISL_467039|2020-06-05					hCoV-19/Scotland/EDB1125/2020|EPI_ISL_491528|2020-04-07	L73F		hCoV-19/Costa_Rica/INC-0047/2020|EPI_ISL_512653|2020-03-09	1																						USA/FL-BPHL-0091/2020|EPI_ISL_445034|2020-04-28	A189G		USA/UT-02246/2020|EPI_ISL_436937|2020-04-15	1
India/GBRC170a/2020|EPI_ISL_467031|2020-06-05					hCoV-19/Scotland/EDB2117/2020|EPI_ISL_491517|2020-04-20	L73F		hCoV-19/Scotland/EDB1196/2020|EPI_ISL_491582|2020-04-08	1																						USA/FL-BPHL-0131/2020|EPI_ISL_450865|2020-04-11	A189G		USA/UT-02054/2020|EPI_ISL_470670|2020-04-20	1
Switzerland/130019/2020|EPI_ISL_467011|2020-05-08					hCoV-19/Scotland/EDB2356/2020|EPI_ISL_491673|2020-04-22	L73F		hCoV-19/Scotland/EDB2121/2020|EPI_ISL_491579|2020-04-20	1																						USA/CA-QDX-159/2020|EPI_ISL_467821|2020-03-16	A189G		England/BIRM-5FAD7/2020|EPI_ISL_473372|2020-05-29	1
England/NORW-EAE02/2020|EPI_ISL_457380|2020-04-30					hCoV-19/Scotland/EDB1252/2020|EPI_ISL_491666|2020-04-09	L73F		hCoV-19/Scotland/EDB2473/2020|EPI_ISL_491626|2020-04-23	1																						USA/VA-DCLS-0683/2020|EPI_ISL_500845|2020-04-18	A189G		England/BIRM-5F8EC/2020|EPI_ISL_473348|2020-05-25	1
Scotland/EDB1374/2020|EPI_ISL_433438|2020-04-10					hCoV-19/Costa_Rica/INC-0029/2020|EPI_ISL_491441|2020-03-14	L73F		hCoV-19/England/BRIS-123F45/2020|EPI_ISL_492810|2020-04-08	1																						USA/WI-UW-835/2020|EPI_ISL_509842|2020-05-22	A189G		England/BIRM-5F837/2020|EPI_ISL_473338|2020-05-13	1
Scotland/EDB1207/2020|EPI_ISL_433430|2020-04-08					hCoV-19/Panama/336085/2020|EPI_ISL_496837|2020-04-03	L73F		hCoV-19/Scotland/EDB2120/2020|EPI_ISL_491527|2020-04-20	1																						Belize/CDC-6851/2020|EPI_ISL_509713|2020-03-27	A189G		England/BIRM-5FAC8/2020|EPI_ISL_473371|2020-05-29	1
Scotland/EDB1172/2020|EPI_ISL_433422|2020-04-07					hCoV-19/South_Africa/R12678-20/2020|EPI_ISL_504220|2020-06-16	L73F		hCoV-19/England/BRIS-1853962/2020|EPI_ISL_492288|2020-04-16	1																						North_Macedonia/ChVir7908/2020|EPI_ISL_492079|2020-06-26	A191G		Spain/COV000950/2020|EPI_ISL_452623|2020-03-28	1
Scotland/EDB1163/2020|EPI_ISL_433414|2020-04-09					hCoV-19/South_Africa/R12705-20/2020|EPI_ISL_504234|2020-06-16	L73F		hCoV-19/Scotland/EDB2255/2020|EPI_ISL_491685|2020-04-21	1																						Senegal/62872/2020|EPI_ISL_476494|2020-06-11	T192C		England/CAMB-1AD8B1/2020|EPI_ISL_448020|2020-05-04	1
Scotland/EDB1118/2020|EPI_ISL_433406|2020-04-06					hCoV-19/South_Africa/R12656-20/2020|EPI_ISL_504211|2020-06-16	L73F		hCoV-19/Panama/335119/2020|EPI_ISL_496806|2020-04-01	1																						Senegal/62184/2020|EPI_ISL_498245|2020-06-09	T192C		England/CAMB-7D43F/2020|EPI_ISL_441661|2020-04-05	1
Singapore/552/2020|EPI_ISL_482699|2020-06-06					hCoV-19/South_Africa/R12670-20/2020|EPI_ISL_504218|2020-06-16	L73F		hCoV-19/USA/PA-MGEL75/2020|EPI_ISL_454361|2020-03-23	1																						Spain/CM-003913/2020|EPI_ISL_500218|2020-04-28	T192G		Spain/Donostia-San_Sebastian2125/2020|EPI_ISL_468916|2020-04-12	1
Singapore/543/2020|EPI_ISL_482691|2020-06-02					hCoV-19/South_Africa/R12711-20/2020|EPI_ISL_504238|2020-06-16	L73F		hCoV-19/Senegal/9845/2020|EPI_ISL_486858|2020-04-20	1																						Spain/Valencia83/2020|EPI_ISL_425207|2020-03-21	C193T		England/BIRM-61076/2020|EPI_ISL_473432|2020-05-26	1
Singapore/318/2020|EPI_ISL_482683|2020-06-02					hCoV-19/Malaysia/3611/2020|EPI_ISL_501207|2020-03-31	L73F		hCoV-19/Scotland/EDB4806/2020|EPI_ISL_453154|2020-05-11	1																						USA/UT-02246/2020|EPI_ISL_436937|2020-04-15	C193T		England/BIRM-5F8A0/2020|EPI_ISL_473345|2020-05-17	1
Spain/COV001545/2020|EPI_ISL_467098|2020-03-16					hCoV-19/Costa_Rica/INC-0047/2020|EPI_ISL_512653|2020-03-09	L73F		hCoV-19/Scotland/EDB3869/2020|EPI_ISL_439347|2020-04-30	1																						India/NCDC-3965/2020|EPI_ISL_436444|2020-04-09	C193A		England/CAMB-776C6/2020|EPI_ISL_439449|2020-03-31	1
Spain/COV002595/2020|EPI_ISL_467090|2020-03-12					hCoV-19/Scotland/EDB1196/2020|EPI_ISL_491582|2020-04-08	L73F		hCoV-19/Scotland/EDB4807/2020|EPI_ISL_478188|2020-05-11	1																						USA/UT-02054/2020|EPI_ISL_470670|2020-04-20	C193T		England/CAMB-80448/2020|EPI_ISL_470366|2020-04-09	1
Spain/COV001900/2020|EPI_ISL_467064|2020-03-15					hCoV-19/Scotland/EDB2121/2020|EPI_ISL_491579|2020-04-20	L73F		hCoV-19/Scotland/EDB3849/2020|EPI_ISL_439338|2020-04-29	1																						England/BIRM-5FAD7/2020|EPI_ISL_473372|2020-05-29	G195T		England/BIRM-5FF8D/2020|EPI_ISL_461542|2020	1
Spain/COV002492/2020|EPI_ISL_467056|2020-03-14					hCoV-19/Scotland/EDB2473/2020|EPI_ISL_491626|2020-04-23	L73F		hCoV-19/Yichun/JX2391/2020|EPI_ISL_455461|2020-02-06	1																						England/BIRM-5F8EC/2020|EPI_ISL_473348|2020-05-25	G195T		Spain/Donostia-San_Sebastian2074/2020|EPI_ISL_468864|2020-04-10	1
Switzerland/130010/2020|EPI_ISL_467005|2020-05-07					hCoV-19/England/BRIS-123F45/2020|EPI_ISL_492810|2020-04-08	L73F		hCoV-19/India/nimh-0182/2020|EPI_ISL_428482|2020-04-08	1																						England/BIRM-5F837/2020|EPI_ISL_473338|2020-05-13	G195T		England/BIRM-5F970/2020|EPI_ISL_473354|2020-05-16	1
England/CAMB-73DB6/2020|EPI_ISL_433697|2020-04-01					hCoV-19/Scotland/EDB2120/2020|EPI_ISL_491527|2020-04-20	L73F		hCoV-19/Scotland/EDB3701/2020|EPI_ISL_439312|2020-04-28	1																						England/BIRM-5FAC8/2020|EPI_ISL_473371|2020-05-29	G195T		England/CAMB-81BE8/2020|EPI_ISL_443051|2020-04-12	1
England/CAMB-73D2F/2020|EPI_ISL_433688|2020-04-01					hCoV-19/England/BRIS-1853962/2020|EPI_ISL_492288|2020-04-16	L73F		hCoV-19/Scotland/EDB4998/2020|EPI_ISL_453179|2020-05-15	1																						Spain/COV000950/2020|EPI_ISL_452623|2020-03-28	G195A		Spain/Donostia-San_Sebastian2091/2020|EPI_ISL_468946|2020-04-10	1
Spain/COV001910/2020|EPI_ISL_467084|2020-03-16					hCoV-19/Scotland/EDB2255/2020|EPI_ISL_491685|2020-04-21	L73F		hCoV-19/England/202822192/2020|EPI_ISL_490248|2020-05-28	1																						England/CAMB-1AD8B1/2020|EPI_ISL_448020|2020-05-04	G195T		England/BIRM-5FF50/2020|EPI_ISL_461539|2020	1
Spain/COV001899/2020|EPI_ISL_467076|2020-03-15					hCoV-19/Panama/335119/2020|EPI_ISL_496806|2020-04-01	L73F		hCoV-19/Scotland/EDB3764/2020|EPI_ISL_439319|2020-04-29	1																						England/CAMB-7D43F/2020|EPI_ISL_441661|2020-04-05	G195T		England/CAMB-781B5/2020|EPI_ISL_433704|2020-04-04	1
USA/MD-HP00101/2020|EPI_ISL_457763|2020-03-18					hCoV-19/USA/PA-MGEL75/2020|EPI_ISL_454361|2020-03-23	L74P		hCoV-19/Scotland/EDB3603/2020|EPI_ISL_439298|2020-04-27	1																						Spain/Donostia-San_Sebastian2125/2020|EPI_ISL_468916|2020-04-12	G195A		England/BIRM-5FAF5/2020|EPI_ISL_473374|2020-05-29	1
USA/MD-HP00077/2020|EPI_ISL_457755|2020-03-17					hCoV-19/Senegal/9845/2020|EPI_ISL_486858|2020-04-20	L74V		hCoV-19/Scotland/EDB4492/2020|EPI_ISL_449312|2020-05-05	1																						England/BIRM-61076/2020|EPI_ISL_473432|2020-05-26	G195T		Spain/COV000928/2020|EPI_ISL_452643|2020-03-27	1
Italy/2389/2020|EPI_ISL_457728|2020-03-04					hCoV-19/Scotland/EDB4806/2020|EPI_ISL_453154|2020-05-11	V75L		hCoV-19/Scotland/EDB4681/2020|EPI_ISL_478183|2020-05-08	1																						England/BIRM-5F8A0/2020|EPI_ISL_473345|2020-05-17	G195T		Netherlands/ZuidHolland_89/2020|EPI_ISL_422956|2020-03-27	1
England/CAMB-78962/2020|EPI_ISL_433796|2020-04-07					hCoV-19/Scotland/EDB3869/2020|EPI_ISL_439347|2020-04-30	V75L		hCoV-19/Scotland/EDB2594/2020|EPI_ISL_439235|2020-04-24	1																						England/CAMB-776C6/2020|EPI_ISL_439449|2020-03-31	G195T		England/BIRM-5FAE6/2020|EPI_ISL_473373|2020-05-29	1
England/CAMB-788B0/2020|EPI_ISL_433786|2020-04-07					hCoV-19/Scotland/EDB4807/2020|EPI_ISL_478188|2020-05-11	V75L		hCoV-19/Scotland/EDB4680/2020|EPI_ISL_478182|2020-05-08	1																						England/CAMB-80448/2020|EPI_ISL_470366|2020-04-09	G195T		England/BIRM-5F846/2020|EPI_ISL_473339|2020-05-10	1
England/CAMB-78829/2020|EPI_ISL_433778|2020-04-07					hCoV-19/Scotland/EDB3849/2020|EPI_ISL_439338|2020-04-29	V75L		hCoV-19/Scotland/EDB5165/2020|EPI_ISL_473814|2020-05-18	1																						England/BIRM-5FF8D/2020|EPI_ISL_461542|2020	G195T		England/BIRM-5F794/2020|EPI_ISL_473329|2020-05-11	1
England/CAMB-7873B/2020|EPI_ISL_433767|2020-04-06					hCoV-19/Yichun/JX2391/2020|EPI_ISL_455461|2020-02-06	V75F		hCoV-19/Scotland/EDB2592/2020|EPI_ISL_439234|2020-04-24	1																						Spain/Donostia-San_Sebastian2074/2020|EPI_ISL_468864|2020-04-10	G195A		England/NOTT-11278D/2020|EPI_ISL_490577|2020-04-17	1
England/CAMB-7866B/2020|EPI_ISL_433759|2020-04-06					hCoV-19/India/nimh-0182/2020|EPI_ISL_428482|2020-04-08	V75F		hCoV-19/Scotland/EDB3826/2020|EPI_ISL_439333|2020-04-28	1																						England/BIRM-5F970/2020|EPI_ISL_473354|2020-05-16	G195T		Spain/PV-004239/2020|EPI_ISL_500303|2020-04-05	1
England/CAMB-7859B/2020|EPI_ISL_433751|2020-04-06					hCoV-19/Scotland/EDB3701/2020|EPI_ISL_439312|2020-04-28	V75L		hCoV-19/Scotland/EDB4661/2020|EPI_ISL_449318|2020-05-08	1																						England/CAMB-81BE8/2020|EPI_ISL_443051|2020-04-12	G195T		Spain/PV-004262/2020|EPI_ISL_500326|2020-04-07	1
England/CAMB-784E9/2020|EPI_ISL_433743|2020-03-26					hCoV-19/Scotland/EDB4998/2020|EPI_ISL_453179|2020-05-15	V75L		hCoV-19/Scotland/EDB4558/2020|EPI_ISL_461726|2020-05-06	1																						Spain/Donostia-San_Sebastian2091/2020|EPI_ISL_468946|2020-04-10	G195A		Spain/PV-004302/2020|EPI_ISL_510417|2020-04-09	1
England/CAMB-78461/2020|EPI_ISL_433735|2020-04-04					hCoV-19/England/202822192/2020|EPI_ISL_490248|2020-05-28	V75L		hCoV-19/Scotland/EDB4437/2020|EPI_ISL_493899|2020-05-04	1																						England/BIRM-5FF50/2020|EPI_ISL_461539|2020	G195T		Spain/PV-004244/2020|EPI_ISL_500308|2020-04-06	1
England/CAMB-783CE/2020|EPI_ISL_433727|2020-04-05					hCoV-19/Scotland/EDB3764/2020|EPI_ISL_439319|2020-04-29	V75L		hCoV-19/Scotland/EDB4655/2020|EPI_ISL_493910|2020-05-08	1																						England/CAMB-781B5/2020|EPI_ISL_433704|2020-04-04	G195T		Spain/PV-004275/2020|EPI_ISL_510394|2020-04-07	1
England/CAMB-78337/2020|EPI_ISL_433719|2020-04-04					hCoV-19/Scotland/EDB3603/2020|EPI_ISL_439298|2020-04-27	V75L		hCoV-19/Scotland/EDB3758/2020|EPI_ISL_491651|2020-04-29	1																						England/BIRM-5FAF5/2020|EPI_ISL_473374|2020-05-29	G195T		Spain/AR-005104/2020|EPI_ISL_510380|2020-04-26	1
England/CAMB-78294/2020|EPI_ISL_433710|2020-04-04					hCoV-19/Scotland/EDB4492/2020|EPI_ISL_449312|2020-05-05	V75L		hCoV-19/Scotland/EDB2571/2020|EPI_ISL_491497|2020-04-24	1																						Spain/COV000928/2020|EPI_ISL_452643|2020-03-27	G195A		Spain/PV-004186/2020|EPI_ISL_510473|2020-04-02	1
England/CAMB-78197/2020|EPI_ISL_433702|2020-04-04					hCoV-19/Scotland/EDB4681/2020|EPI_ISL_478183|2020-05-08	V75L																									Netherlands/ZuidHolland_89/2020|EPI_ISL_422956|2020-03-27	G195T		Spain/PV-004279/2020|EPI_ISL_510397|2020-04-08	1
England/NOTT-11152A/2020|EPI_ISL_457576|2020-05-01					hCoV-19/Scotland/EDB2594/2020|EPI_ISL_439235|2020-04-24	V75L																									England/BIRM-5FAE6/2020|EPI_ISL_473373|2020-05-29	G195T		Spain/PV-004267/2020|EPI_ISL_500331|2020-04-07	1
England/NORW-EC592/2020|EPI_ISL_457534|2020-05-10					hCoV-19/Scotland/EDB4680/2020|EPI_ISL_478182|2020-05-08	V75L																									England/BIRM-5F846/2020|EPI_ISL_473339|2020-05-10	G195T		Spain/PV-004248/2020|EPI_ISL_500312|2020-04-06	1
Scotland/CVR1751/2020|EPI_ISL_433658|2020-04-06					hCoV-19/Scotland/EDB5165/2020|EPI_ISL_473814|2020-05-18	V75L																									England/BIRM-5F794/2020|EPI_ISL_473329|2020-05-11	G195T		Australia/NSW297/2020|EPI_ISL_451561|2020-04-02	1
Scotland/EDB5344/2020|EPI_ISL_457002|2020-05-22					hCoV-19/Scotland/EDB2592/2020|EPI_ISL_439234|2020-04-24	V75L																									England/NOTT-11278D/2020|EPI_ISL_490577|2020-04-17	G195T		England/BRIS-12BE8C/2020|EPI_ISL_469346|2020-05-08	1
France/10074LD/2020|EPI_ISL_447684|2020-03					hCoV-19/Scotland/EDB3826/2020|EPI_ISL_439333|2020-04-28	V75L																									Spain/PV-004239/2020|EPI_ISL_500303|2020-04-05	G195A		India/ILSCV25594/2020|EPI_ISL_481115|2020-05-19	1
France/20001SE/2020|EPI_ISL_447666|2020-03					hCoV-19/Scotland/EDB4661/2020|EPI_ISL_449318|2020-05-08	V75L																									Spain/PV-004262/2020|EPI_ISL_500326|2020-04-07	G195A		USA/NM-UNM-00398/2020|EPI_ISL_508060|2020-04-17	1
France/40005BH/2020|EPI_ISL_447658|2020-03					hCoV-19/Scotland/EDB4558/2020|EPI_ISL_461726|2020-05-06	V75L																									Spain/PV-004302/2020|EPI_ISL_510417|2020-04-09	G195A		USA/NM-UNM-00350/2020|EPI_ISL_508005|2020-04-06	1
England/CAMB-73CC8/2020|EPI_ISL_433684|2020-04-01					hCoV-19/Scotland/EDB4437/2020|EPI_ISL_493899|2020-05-04	V75L																									Spain/PV-004244/2020|EPI_ISL_500308|2020-04-06	G195A		USA/AZ-UNM-00375/2020|EPI_ISL_508045|2020-05-13	1
England/CAMB-73C04/2020|EPI_ISL_433676|2020-04-02					hCoV-19/Scotland/EDB4655/2020|EPI_ISL_493910|2020-05-08	V75L																									Spain/PV-004275/2020|EPI_ISL_510394|2020-04-07	G195A		USA/NM-UNM-00374/2020|EPI_ISL_508013|2020-05-11	1
England/CAMB-73B70/2020|EPI_ISL_433668|2020-04-03					hCoV-19/Scotland/EDB3758/2020|EPI_ISL_491651|2020-04-29	V75L																									Spain/AR-005104/2020|EPI_ISL_510380|2020-04-26	G195T		USA/NM-UNM-00332/2020|EPI_ISL_507995|2020-05-22	1
Scotland/CVR1587/2020|EPI_ISL_433625|2020-04-05					hCoV-19/Scotland/EDB2571/2020|EPI_ISL_491497|2020-04-24	V75L																									Spain/PV-004186/2020|EPI_ISL_510473|2020-04-02	G195A		USA/NM-UNM-00364/2020|EPI_ISL_508082|2020-04-30	1
England/NOTT-10F756/2020|EPI_ISL_433045|2020-04-04																															Spain/PV-004279/2020|EPI_ISL_510397|2020-04-08	G195A		USA/NM-UNM-00386/2020|EPI_ISL_508075|2020-04-12	1
England/NOTT-10F659/2020|EPI_ISL_433031|2020-04-03																															Spain/PV-004267/2020|EPI_ISL_500331|2020-04-07	G195A		England/LCST-24D6ED2/2020|EPI_ISL_484249|2020-06-12	1
England/NOTT-10F56B/2020|EPI_ISL_433019|2020-04-03																															Spain/PV-004248/2020|EPI_ISL_500312|2020-04-06	G195A		England/NOTT-1124E0/2020|EPI_ISL_484386|2020-05-30	1
England/NOTT-10F4D7/2020|EPI_ISL_433011|2020-04-02																															Australia/NSW297/2020|EPI_ISL_451561|2020-04-02	A196C		England/LCST-24D685C/2020|EPI_ISL_478302|2020-05-31	1
England/20131103904/2020|EPI_ISL_423695|2020-03-21																															England/BRIS-12BE8C/2020|EPI_ISL_469346|2020-05-08	A196C		England/LCST-24D6EE1/2020|EPI_ISL_484250|2020-06-13	1
Wales/PHWC-15CFAD/2020|EPI_ISL_472649|2020-04-11																															India/ILSCV25594/2020|EPI_ISL_481115|2020-05-19	A197C		Spain/Zaragoza2482/2020|EPI_ISL_468857|2020-03-23	1
England/EXET-1356B4/2020|EPI_ISL_457086|2020-04-12																															USA/NM-UNM-00398/2020|EPI_ISL_508060|2020-04-17	A197C		Guangzhou/GZMU0049/2020|EPI_ISL_429094|2020-02-08	1
England/EXET-13560F/2020|EPI_ISL_457076|2020-04-12																															USA/NM-UNM-00350/2020|EPI_ISL_508005|2020-04-06	A197C		Wuhan/HB-WH1-130/2020|EPI_ISL_454909|2020-03-02	1
England/EXET-1354C9/2020|EPI_ISL_457067|2020-04-11																															USA/AZ-UNM-00375/2020|EPI_ISL_508045|2020-05-13	A197C		Sweden/20-51044/2020|EPI_ISL_450831|2020-04-27	1
England/EXET-135423/2020|EPI_ISL_457058|2020-04-02																															USA/NM-UNM-00374/2020|EPI_ISL_508013|2020-05-11	A197C		England/OXON-ACBAB/2020|EPI_ISL_448515|2020-04-06	1
Scotland/EDB816/2020|EPI_ISL_457020|2020-04-03																															USA/NM-UNM-00332/2020|EPI_ISL_507995|2020-05-22	A197C		England/CAMB-1AECF0/2020|EPI_ISL_448073|2020	1
Scotland/EDB5373/2020|EPI_ISL_457011|2020-03-30																															USA/NM-UNM-00364/2020|EPI_ISL_508082|2020-04-30	A197C		England/CAMB-1ADB6D/2020|EPI_ISL_448038|2020	1
France/10034HM/2020|EPI_ISL_447675|2020-03																															USA/NM-UNM-00386/2020|EPI_ISL_508075|2020-04-12	A197C		England/CAMB-1B2BA1/2020|EPI_ISL_456708|2020-05-19	1
Germany/FFM5/2020|EPI_ISL_447611|2020-02																															England/LCST-24D6ED2/2020|EPI_ISL_484249|2020-06-12	T198C		England/CAMB-1B2637/2020|EPI_ISL_456700|2020-05-19	1
Scotland/EDB1631/2020|EPI_ISL_433095|2020-04-14																															England/NOTT-1124E0/2020|EPI_ISL_484386|2020-05-30	T198C		England/CAMB-1AEDA2/2020|EPI_ISL_452862|2020-05-09	1
England/NOTT-10F98D/2020|EPI_ISL_433066|2020-04-05																															England/LCST-24D685C/2020|EPI_ISL_478302|2020-05-31	T198C		Sweden/20-51816/2020|EPI_ISL_475568|2020-06-01	1
England/NOTT-10F817/2020|EPI_ISL_433052|2020-04-04																															England/LCST-24D6EE1/2020|EPI_ISL_484250|2020-06-13	T198C		England/NOTT-11038B/2020|EPI_ISL_441506|2020-04-16	1
England/NOTT-10F413/2020|EPI_ISL_433002|2020-04-02																															Spain/Zaragoza2482/2020|EPI_ISL_468857|2020-03-23	C203T		England/20190141101/2020|EPI_ISL_465592|2020-05-04	1
England/20130092304/2020|EPI_ISL_423681|2020-03-22																															Guangzhou/GZMU0049/2020|EPI_ISL_429094|2020-02-08	C203G		Sweden/20-50935/2020|EPI_ISL_475162|2020-04-21	1
England/20130087004/2020|EPI_ISL_423673|2020-03-20																															Wuhan/HB-WH1-130/2020|EPI_ISL_454909|2020-03-02	C203G		Wuhan/HB-WH1-133/2020|EPI_ISL_455366|2020-02-23	1
England/20130072104/2020|EPI_ISL_423664|2020-03-23																															Sweden/20-51044/2020|EPI_ISL_450831|2020-04-27	C203T		Wales/PHWC-289DA/2020|EPI_ISL_445384|2020-04-01	1
England/20130069504/2020|EPI_ISL_423656|2020-03-22																															England/OXON-ACBAB/2020|EPI_ISL_448515|2020-04-06	C203T		Singapore/97/2020|EPI_ISL_443189|2020-03-18	1
England/20130063604/2020|EPI_ISL_423647|2020-03-22																															England/CAMB-1AECF0/2020|EPI_ISL_448073|2020	C203T		England/LIVE-9EA90/2020|EPI_ISL_453360|2020-04-04	1
England/EXET-135748/2020|EPI_ISL_457093|2020-04-09																															England/CAMB-1ADB6D/2020|EPI_ISL_448038|2020	C203T		USA/MA-MGH-00688/2020|EPI_ISL_460257|2020-04-06	1
England/EXET-135274/2020|EPI_ISL_457041|2020-04-04																															England/CAMB-1B2BA1/2020|EPI_ISL_456708|2020-05-19	C203T		England/LIVE-9D76D/2020|EPI_ISL_453231|2020-04-15	1
England/EXET-135098/2020|EPI_ISL_457028|2020-04-07																															England/CAMB-1B2637/2020|EPI_ISL_456700|2020-05-19	C203T		England/LIVE-9A5C0/2020|EPI_ISL_449351|2020-03-26	1
France/30001MB/2020|EPI_ISL_447723|2020-03																															England/CAMB-1AEDA2/2020|EPI_ISL_452862|2020-05-09	C203T		USA/MA-MGH-00642/2020|EPI_ISL_460148|2020-04-01	1
France/10022AR/2020|EPI_ISL_447715|2020-03																															Sweden/20-51816/2020|EPI_ISL_475568|2020-06-01	C203T		England/LIVE-9D7C7/2020|EPI_ISL_453233|2020-04-15	1
France/50004CS/2020|EPI_ISL_447706|2020-03																															England/NOTT-11038B/2020|EPI_ISL_441506|2020-04-16	C203T		Japan/PG-0285/2020|EPI_ISL_479964|2020-03-23	1
France/50001AR/2020|EPI_ISL_447698|2020-03																															England/20190141101/2020|EPI_ISL_465592|2020-05-04	C203T		England/CAMB-1B1DAC/2020|EPI_ISL_458516|2020-05-09	1
France/10059IS/2020|EPI_ISL_447690|2020-03																															Sweden/20-50935/2020|EPI_ISL_475162|2020-04-21	C203T		England/NORT-296410/2020|EPI_ISL_488017|2020-05-13	1
Scotland/EDB1565/2020|EPI_ISL_433082|2020-04-12																															Wuhan/HB-WH1-133/2020|EPI_ISL_455366|2020-02-23	C203G		England/NORT-29C878/2020|EPI_ISL_484284|2020-05-02	1
Scotland/EDB153/2020|EPI_ISL_433074|2020-03-24																															Wales/PHWC-289DA/2020|EPI_ISL_445384|2020-04-01	C203A		England/NORT-29DD3C/2020|EPI_ISL_484315|2020-05-07	1
England/NOTT-10F8AE/2020|EPI_ISL_433056|2020-04-05																															Singapore/97/2020|EPI_ISL_443189|2020-03-18	C203T		England/NORT-29EA52/2020|EPI_ISL_490470|2020-05-18	1
England/20132023604/2020|EPI_ISL_423751|2020-03-23																															England/LIVE-9EA90/2020|EPI_ISL_453360|2020-04-04	C203T		Scotland/GCVR-1739EE/2020|EPI_ISL_459113|2020-04-07	1
England/20132021004/2020|EPI_ISL_423741|2020-03-24																															USA/MA-MGH-00688/2020|EPI_ISL_460257|2020-04-06	C203T		Scotland/CVR2908/2020|EPI_ISL_484652|2020-04-22	1
England/20132018704/2020|EPI_ISL_423733|2020-03-23																															England/LIVE-9D76D/2020|EPI_ISL_453231|2020-04-15	C203T		Russia/StPetersburg-RII4597S/2020|EPI_ISL_427319|2020-04-04	1
England/20132005904/2020|EPI_ISL_423725|2020-03-23																															England/LIVE-9A5C0/2020|EPI_ISL_449351|2020-03-26	C203T		USA/NY-NYUMC351/2020|EPI_ISL_430378|2020-04-07	1
USA/FL-UF5/2020|EPI_ISL_447589|2020-03-27																															USA/MA-MGH-00642/2020|EPI_ISL_460148|2020-04-01	C203T		England/LIVE-99A1D/2020|EPI_ISL_439787|2020-04-12	1
India/GBRC88a/2020|EPI_ISL_447549|2020-05-03																															England/LIVE-9D7C7/2020|EPI_ISL_453233|2020-04-15	C203T		Sweden/20-07861/2020|EPI_ISL_450822|2020-04-23	1
India/GBRC81b/2020|EPI_ISL_447541|2020-05-05																															Japan/PG-0285/2020|EPI_ISL_479964|2020-03-23	C203T		England/CAMB-1AECE1/2020|EPI_ISL_448072|2020	1
England/20132021204/2020|EPI_ISL_423743|2020-03-23																															England/CAMB-1B1DAC/2020|EPI_ISL_458516|2020-05-09	C203T		England/EXET-136EAC/2020|EPI_ISL_471930|2020-04-21	1
England/20132004204/2020|EPI_ISL_423714|2020-03-23																															England/NORT-296410/2020|EPI_ISL_488017|2020-05-13	C203T		England/CAMB-1B2C08/2020|EPI_ISL_456713|2020-05-19	1
England/20132001904/2020|EPI_ISL_423706|2020-03-23																															England/NORT-29C878/2020|EPI_ISL_484284|2020-05-02	C203T		England/CAMB-1AED93/2020|EPI_ISL_452861|2020-05-09	1
England/20130032604/2020|EPI_ISL_423598|2020-03-21																															England/NORT-29DD3C/2020|EPI_ISL_484315|2020-05-07	C203T		England/CAMB-1B054B/2020|EPI_ISL_452890|2020-05-11	1
England/20148041104/2020|EPI_ISL_423590|2020-04-02																															England/NORT-29EA52/2020|EPI_ISL_490470|2020-05-18	C203T		England/NORT-283E63/2020|EPI_ISL_472257|2020-04-05	1
England/20146018404/2020|EPI_ISL_423581|2020-04-02																															Scotland/GCVR-1739EE/2020|EPI_ISL_459113|2020-04-07	C203T		England/CAMB-1B193F/2020|EPI_ISL_452983|2020-05-13	1
England/20144076204/2020|EPI_ISL_423570|2020-04-01																															Scotland/CVR2908/2020|EPI_ISL_484652|2020-04-22	C203T		Sweden/20-14071/2020|EPI_ISL_475541|2020-04-28	1
England/20144071504/2020|EPI_ISL_423559|2020-04-01																															Russia/StPetersburg-RII4597S/2020|EPI_ISL_427319|2020-04-04	C203T		Sweden/20-50933/2020|EPI_ISL_475161|2020-04-20	1
England/20144060204/2020|EPI_ISL_423548|2020-03-31																															USA/NY-NYUMC351/2020|EPI_ISL_430378|2020-04-07	C203T		Wuhan/HB-WH3-174/2020|EPI_ISL_455376|2020-02-28	1
England/20144037404/2020|EPI_ISL_423538|2020-03-31																															England/LIVE-99A1D/2020|EPI_ISL_439787|2020-04-12	C203T		Wales/PHWC-2AF12/2020|EPI_ISL_432414|2020-04-06	1
England/20144023904/2020|EPI_ISL_423529|2020-03-27																															Sweden/20-07861/2020|EPI_ISL_450822|2020-04-23	C203T		Wuhan/HB-WH1-123/2020|EPI_ISL_455363|2020-03-02	1
Wales/PHWC-15CBF4/2020|EPI_ISL_472595|2020-03-29																															England/CAMB-1AECE1/2020|EPI_ISL_448072|2020	C203T		England/LIVE-9F033/2020|EPI_ISL_453421|2020-04-15	1
England/EXET-136A20/2020|EPI_ISL_457244|2020-05-05																															England/EXET-136EAC/2020|EPI_ISL_471930|2020-04-21	C203T		England/CAMB-1AFCE0/2020|EPI_ISL_459225|2020-05-04	1
England/EXET-1367FC/2020|EPI_ISL_457236|2020-04-29																															England/CAMB-1B2C08/2020|EPI_ISL_456713|2020-05-19	C203T		England/CAMB-1B12AD/2020|EPI_ISL_459185|2020-05-06	1
England/EXET-13660E/2020|EPI_ISL_457227|2020-04-27																															England/CAMB-1AED93/2020|EPI_ISL_452861|2020-05-09	C203T		England/CAMB-1B1E21/2020|EPI_ISL_458524|2020-05-09	1
England/EXET-136307/2020|EPI_ISL_457218|2020-04-13																															England/CAMB-1B054B/2020|EPI_ISL_452890|2020-05-11	C203T		England/NORT-2827A5/2020|EPI_ISL_488544|2020-03-27	1
England/EXET-1361D0/2020|EPI_ISL_457209|2020-04-14																															England/NORT-283E63/2020|EPI_ISL_472257|2020-04-05	C203T		England/NORT-296FE2/2020|EPI_ISL_488145|2020-04-23	1
Scotland/CVR375/2020|EPI_ISL_433287|2020-03-21																															England/CAMB-1B193F/2020|EPI_ISL_452983|2020-05-13	C203T		England/NORT-297664/2020|EPI_ISL_488036|2020-04-22	1
Scotland/EDB889/2020|EPI_ISL_433267|2020-04-04																															Sweden/20-14071/2020|EPI_ISL_475541|2020-04-28	C203T		England/CAMB-1AFD0B/2020|EPI_ISL_459221|2020-05-04	1
Scotland/EDB864/2020|EPI_ISL_433259|2020-04-04																															Sweden/20-50933/2020|EPI_ISL_475161|2020-04-20	C203T		England/CAMB-1AFD47/2020|EPI_ISL_459212|2020-05-04	1
Scotland/EDB824/2020|EPI_ISL_433251|2020-04-04																															Wuhan/HB-WH3-174/2020|EPI_ISL_455376|2020-02-28	C203G		England/CAMB-1AFD29/2020|EPI_ISL_459203|2020-05-04	1
Scotland/EDB653/2020|EPI_ISL_433221|2020-04-02																															Wales/PHWC-2AF12/2020|EPI_ISL_432414|2020-04-06	C203A		England/CAMB-1B2AFF/2020|EPI_ISL_469907|2020-05-16	1
England/20130062504/2020|EPI_ISL_423643|2020-03-21																															Wuhan/HB-WH1-123/2020|EPI_ISL_455363|2020-03-02	C203G		Scotland/GCVR-17228A/2020|EPI_ISL_469993|2020-03-30	1
England/20130052804/2020|EPI_ISL_423632|2020-03-21																															England/LIVE-9F033/2020|EPI_ISL_453421|2020-04-15	C203T		Scotland/GCVR-171A92/2020|EPI_ISL_489530|2020-03-27	1
England/20130050904/2020|EPI_ISL_423623|2020-03-23																															England/CAMB-1AFCE0/2020|EPI_ISL_459225|2020-05-04	C203T		Sweden/20-07860/2020|EPI_ISL_450821|2020-04-23	1
England/20130035804/2020|EPI_ISL_423613|2020-03-23																															England/CAMB-1B12AD/2020|EPI_ISL_459185|2020-05-06	C203T		USA/MI-MDHHS-SC20723/2020|EPI_ISL_471747|2020-04-20	1
England/20130034204/2020|EPI_ISL_423605|2020-03-22																															England/CAMB-1B1E21/2020|EPI_ISL_458524|2020-05-09	C203T		England/CAMB-1AED84/2020|EPI_ISL_452860|2020-05-09	1
USA/OR-PROV-009/2020|EPI_ISL_482297|2020-04-09																															England/NORT-2827A5/2020|EPI_ISL_488544|2020-03-27	C203T		England/CAMB-1B0675/2020|EPI_ISL_452904|2020-05-09	1
Wales/PHWC-1600FE/2020|EPI_ISL_472896|2020-05-25																															England/NORT-296FE2/2020|EPI_ISL_488145|2020-04-23	C203T		England/20192020301/2020|EPI_ISL_465598|2020-05-04	1
Wales/PHWC-15FCD0/2020|EPI_ISL_472845|2020-05-21																															England/NORT-297664/2020|EPI_ISL_488036|2020-04-22	C203T		Sweden/20-50931/2020|EPI_ISL_475160|2020-04-20	1
England/LOND-D5A42/2020|EPI_ISL_457293|2020-04-16																															England/CAMB-1AFD0B/2020|EPI_ISL_459221|2020-05-04	C203T		Wuhan/HB-WH1-129/2020|EPI_ISL_455364|2020-03-02	1
England/LOND-D59AF/2020|EPI_ISL_457285|2020-04-17																															England/CAMB-1AFD47/2020|EPI_ISL_459212|2020-05-04	C203T		Scotland/CVR2959/2020|EPI_ISL_473633|2020-04-22	1
England/LOND-D5909/2020|EPI_ISL_457277|2020-04-17																															England/CAMB-1AFD29/2020|EPI_ISL_459203|2020-05-04	C203T		England/LIVE-9C670/2020|EPI_ISL_449566|2020-03-23	1
England/LIVE-9F604/2020|EPI_ISL_457269|2020-05-16																															England/CAMB-1B2AFF/2020|EPI_ISL_469907|2020-05-16	C203T		England/LIVE-9C591/2020|EPI_ISL_449555|2020-03-23	1
England/LIVE-9F525/2020|EPI_ISL_457260|2020-05-07																															Scotland/GCVR-17228A/2020|EPI_ISL_469993|2020-03-30	C203T		England/CAMB-1B1313/2020|EPI_ISL_458570|2020-05-06	1
England/EXET-136B69/2020|EPI_ISL_457250|2020-04-24																															Scotland/GCVR-171A92/2020|EPI_ISL_489530|2020-03-27	C203T		England/CAMB-1B1DCA/2020|EPI_ISL_458552|2020-05-09	1
England/BIRM-5ED84/2020|EPI_ISL_447941|2020-05-01																															Sweden/20-07860/2020|EPI_ISL_450821|2020-04-23	C203T		England/NORT-295B85/2020|EPI_ISL_488629|2020-04-03	1
USA/CA-CDC-0139/2020|EPI_ISL_447886|2020-03-23																															USA/MI-MDHHS-SC20723/2020|EPI_ISL_471747|2020-04-20	C203T		England/NORT-2978D7/2020|EPI_ISL_488023|2020-04-22	1
Scotland/EDB788/2020|EPI_ISL_433244|2020-04-04																															England/CAMB-1AED84/2020|EPI_ISL_452860|2020-05-09	C203T		England/NORT-29CB06/2020|EPI_ISL_484291|2020-05-01	1
Scotland/EDB753/2020|EPI_ISL_433236|2020-04-03																															England/CAMB-1B0675/2020|EPI_ISL_452904|2020-05-09	C203T		England/NORT-29265A/2020|EPI_ISL_489136|2020-05-12	1
Scotland/EDB721/2020|EPI_ISL_433228|2020-04-02																															England/20192020301/2020|EPI_ISL_465598|2020-05-04	C203T		USA/LA-GBCL-26492460/2020|EPI_ISL_485037|2020-04-28	1
Scotland/EDB591/2020|EPI_ISL_433209|2020-04-01																															Sweden/20-50931/2020|EPI_ISL_475160|2020-04-20	C203T		Australia/NSW291/2020|EPI_ISL_451555|2020-04-03	1
England/20129014802/2020|EPI_ISL_423995|2020-03-21																															Wuhan/HB-WH1-129/2020|EPI_ISL_455364|2020-03-02	C203G		England/CAMB-1ADBC7/2020|EPI_ISL_448044|2020-05-04	1
England/20129010902/2020|EPI_ISL_423987|2020-03-20																															Scotland/CVR2959/2020|EPI_ISL_473633|2020-04-22	C203T		USA/NY-NYUMC783/2020|EPI_ISL_456020|2020-03-25	1
England/20126103604/2020|EPI_ISL_423913|2020-03-18																															England/LIVE-9C670/2020|EPI_ISL_449566|2020-03-23	C203T		England/20146021204/2020|EPI_ISL_466040|2020-03-31	1
England/20126095704/2020|EPI_ISL_423904|2020-03-18																															England/LIVE-9C591/2020|EPI_ISL_449555|2020-03-23	C203T		England/CAMB-1B1999/2020|EPI_ISL_452989|2020-05-14	1
England/20126027106/2020|EPI_ISL_423896|2020-03-18																															England/CAMB-1B1313/2020|EPI_ISL_458570|2020-05-06	C203T		England/CAMB-1B1911/2020|EPI_ISL_452981|2020-05-13	1
England/20126009804/2020|EPI_ISL_423887|2020-03-17																															England/CAMB-1B1DCA/2020|EPI_ISL_458552|2020-05-09	C203T		Scotland/CVR2917/2020|EPI_ISL_473630|2020-04-22	1
England/EXET-1359AC/2020|EPI_ISL_457121|2020-04-22																															England/NORT-295B85/2020|EPI_ISL_488629|2020-04-03	C203T		Scotland/CVR2227/2020|EPI_ISL_448169|2020-04-12	1
England/EXET-1358CD/2020|EPI_ISL_457113|2020-04-15																															England/NORT-2978D7/2020|EPI_ISL_488023|2020-04-22	C203T		England/LIVE-9B556/2020|EPI_ISL_449460|2020-04-02	1
England/EXET-135827/2020|EPI_ISL_457104|2020-04-17																															England/NORT-29CB06/2020|EPI_ISL_484291|2020-05-01	C203T		England/LIVE-9C018/2020|EPI_ISL_449502|2020-03-23	1
England/CAMB-1AD07D/2020|EPI_ISL_447961|2020-04-29																															England/NORT-29265A/2020|EPI_ISL_489136|2020-05-12	C203T		England/NORT-295851/2020|EPI_ISL_488516|2020-04-01	1
England/CAMB-1AC375/2020|EPI_ISL_447952|2020-04-29																															USA/LA-GBCL-26492460/2020|EPI_ISL_485037|2020-04-28	C203T		England/NORT-2979A7/2020|EPI_ISL_488052|2020-04-21	1
England/BIRM-5EE45/2020|EPI_ISL_447944|2020-05-03																															Australia/NSW291/2020|EPI_ISL_451555|2020-04-03	C203T		England/NORT-29CADC/2020|EPI_ISL_484290|2020-04-30	1
England/BIRM-5E971/2020|EPI_ISL_447925|2020-04-26																															England/CAMB-1ADBC7/2020|EPI_ISL_448044|2020-05-04	C203T		England/NORT-296F88/2020|EPI_ISL_484281|2020-04-28	1
Scotland/EDB2050/2020|EPI_ISL_433166|2020-04-18																															USA/NY-NYUMC783/2020|EPI_ISL_456020|2020-03-25	C203T		England/CAMB-1AFDDE/2020|EPI_ISL_459189|2020-05-04	1
Scotland/EDB1927/2020|EPI_ISL_433158|2020-04-17																															England/20146021204/2020|EPI_ISL_466040|2020-03-31	C203T		England/NORT-292669/2020|EPI_ISL_489097|2020-05-12	1
Scotland/EDB1830/2020|EPI_ISL_433150|2020-04-16																															England/CAMB-1B1999/2020|EPI_ISL_452989|2020-05-14	C203T		England/CAMB-1B2B38/2020|EPI_ISL_469905|2020-05-15	1
Scotland/EDB1820/2020|EPI_ISL_433142|2020-04-16																															England/CAMB-1B1911/2020|EPI_ISL_452981|2020-05-13	C203T		Scotland/CVR2444/2020|EPI_ISL_477941|2020-04-14	1
Scotland/EDB1810/2020|EPI_ISL_433134|2020-04-16																															Scotland/CVR2917/2020|EPI_ISL_473630|2020-04-22	C203T		Scotland/CVR2785/2020|EPI_ISL_473565|2020-04-20	1
England/20129015704/2020|EPI_ISL_423999|2020-03-21																															Scotland/CVR2227/2020|EPI_ISL_448169|2020-04-12	C203T		Scotland/GCVR-17233C/2020|EPI_ISL_469976|2020-03-29	1
England/20129009304/2020|EPI_ISL_423979|2020-03-20																															England/LIVE-9B556/2020|EPI_ISL_449460|2020-04-02	C203T		England/LIVE-9A27E/2020|EPI_ISL_439862|2020-04-18	1
England/20128095504/2020|EPI_ISL_423970|2020-03-20																															England/LIVE-9C018/2020|EPI_ISL_449502|2020-03-23	C203T		England/LIVE-99FF0/2020|EPI_ISL_439836|2020-04-14	1
England/20128041504/2020|EPI_ISL_423962|2020-03-19																															England/NORT-295851/2020|EPI_ISL_488516|2020-04-01	C203T		England/OXON-ACD87/2020|EPI_ISL_448535|2020-04-06	1
England/20128036304/2020|EPI_ISL_423953|2020-03-18																															England/NORT-2979A7/2020|EPI_ISL_488052|2020-04-21	C203T		England/CAMB-1B00D1/2020|EPI_ISL_448108|2020-05-07	1
England/20128015604/2020|EPI_ISL_423943|2020-03-19																															England/NORT-29CADC/2020|EPI_ISL_484290|2020-04-30	C203T		England/CAMB-1B001D/2020|EPI_ISL_448098|2020-05-06	1
England/20128012404/2020|EPI_ISL_423934|2020-03-19																															England/NORT-296F88/2020|EPI_ISL_484281|2020-04-28	C203T		Wuhan/HB-WH4-202/2020|EPI_ISL_455388|2020-03-17	1
England/20128003506/2020|EPI_ISL_423926|2020-03-18																															England/CAMB-1AFDDE/2020|EPI_ISL_459189|2020-05-04	C203T		Scotland/CVR2173/2020|EPI_ISL_448151|2020-04-11	1
Wales/PHWC-15DF8E/2020|EPI_ISL_472784|2020-05-15																															England/NORT-292669/2020|EPI_ISL_489097|2020-05-12	C203T		Australia/VIC04/2020|EPI_ISL_416412|2020-03-02	1
England/EXET-1360C4/2020|EPI_ISL_457196|2020-04-17																															England/CAMB-1B2B38/2020|EPI_ISL_469905|2020-05-15	C203T		England/LIVE-9C82F/2020|EPI_ISL_449584|2020-03-21	1
England/EXET-135F6E/2020|EPI_ISL_457183|2020-03-29																															Scotland/CVR2444/2020|EPI_ISL_477941|2020-04-14	C203T		England/LIVE-9A548/2020|EPI_ISL_449344|2020-03-25	1
England/EXET-135E70/2020|EPI_ISL_457175|2020-04-07																															Scotland/CVR2785/2020|EPI_ISL_473565|2020-04-20	C203T		Australia/VIC37/2020|EPI_ISL_419754|2020-03-11	1
England/EXET-135B4C/2020|EPI_ISL_457136|2020-04-09																															Scotland/GCVR-17233C/2020|EPI_ISL_469976|2020-03-29	C203T		England/LIVE-9C7E6/2020|EPI_ISL_449580|2020-03-23	1
France/10064DR/2020|EPI_ISL_447729|2020-03																															England/LIVE-9A27E/2020|EPI_ISL_439862|2020-04-18	C203T		Japan/Donner28/2020|EPI_ISL_438972|2020-03-27	1
Scotland/EDB2087/2020|EPI_ISL_433186|2020-04-19																															England/LIVE-99FF0/2020|EPI_ISL_439836|2020-04-14	C203T		England/NORT-284C1D/2020|EPI_ISL_488715|2020-03-27	1
Scotland/EDB1707/2020|EPI_ISL_433125|2020-04-16																															England/OXON-ACD87/2020|EPI_ISL_448535|2020-04-06	C203T		England/NORT-29E16C/2020|EPI_ISL_488135|2020-05-05	1
Scotland/EDB1683/2020|EPI_ISL_433117|2020-04-16																															England/CAMB-1B00D1/2020|EPI_ISL_448108|2020-05-07	C203T		England/CAMB-1AFDFC/2020|EPI_ISL_459239|2020-05-04	1
Scotland/EDB1660/2020|EPI_ISL_433109|2020-04-14																															England/CAMB-1B001D/2020|EPI_ISL_448098|2020-05-06	C203T		England/CAMB-1AFD92/2020|EPI_ISL_459198|2020-05-04	1
Scotland/EDB1642/2020|EPI_ISL_433101|2020-04-14																															Wuhan/HB-WH4-202/2020|EPI_ISL_455388|2020-03-17	C203G		Scotland/CVR2417/2020|EPI_ISL_477934|2020-04-14	1
England/20132067304/2020|EPI_ISL_423793|2020-03-23																															Scotland/CVR2173/2020|EPI_ISL_448151|2020-04-11	C203T		Scotland/CVR2303/2020|EPI_ISL_477896|2020-04-12	1
England/20132047404/2020|EPI_ISL_423783|2020-03-24																															Australia/VIC04/2020|EPI_ISL_416412|2020-03-02	C203T		Japan/PG-0256/2020|EPI_ISL_479941|2020-03-21	1
England/20132032904/2020|EPI_ISL_423775|2020-03-22																															England/LIVE-9C82F/2020|EPI_ISL_449584|2020-03-21	C203T		Kenya/D5/2020|EPI_ISL_457999|2020-05-22	1
England/20132031104/2020|EPI_ISL_423767|2020-03-22																															England/LIVE-9A548/2020|EPI_ISL_449344|2020-03-25	C203T		USA/TX-HMH0234/2020|EPI_ISL_434891|2020-03-24	1
England/EXET-135D46/2020|EPI_ISL_457161|2020-04-03																															Australia/VIC37/2020|EPI_ISL_419754|2020-03-11	C203T		Israel/CVL-n-6140/2020|EPI_ISL_474981|2020-03-15	1
England/EXET-135CA3/2020|EPI_ISL_457153|2020-04-10																															England/LIVE-9C7E6/2020|EPI_ISL_449580|2020-03-23	C203T		England/CAMB-1B3EB6/2020|EPI_ISL_473451|2020-06-09	1
England/EXET-135BE2/2020|EPI_ISL_457145|2020-04-04																															Japan/Donner28/2020|EPI_ISL_438972|2020-03-27	C203T		England/CAMB-1AED2A/2020|EPI_ISL_448076|2020-05-06	1
England/EXET-135AE5/2020|EPI_ISL_457133|2020-04-07																															England/NORT-284C1D/2020|EPI_ISL_488715|2020-03-27	C203T		Wuhan/HB-WH2-146/2020|EPI_ISL_455370|2020-02-24	1
Scotland/EDB2099/2020|EPI_ISL_433197|2020-04-18																															England/NORT-29E16C/2020|EPI_ISL_488135|2020-05-05	C203T		England/LIVE-9C8A7/2020|EPI_ISL_449590|2020-03-23	1
Scotland/EDB2090/2020|EPI_ISL_433189|2020-04-19																															England/CAMB-1AFDFC/2020|EPI_ISL_459239|2020-05-04	C203T		England/LIVE-9B5CF/2020|EPI_ISL_449466|2020-03-25	1
Scotland/EDB2065/2020|EPI_ISL_433172|2020-04-18																															England/CAMB-1AFD92/2020|EPI_ISL_459198|2020-05-04	C203T		England/LIVE-9B240/2020|EPI_ISL_449423|2020-03-27	1
England/20126008506/2020|EPI_ISL_423881|2020-03-18																															Scotland/CVR2417/2020|EPI_ISL_477934|2020-04-14	C203T		England/LIVE-9C072/2020|EPI_ISL_449503|2020-03-25	1
England/20126002404/2020|EPI_ISL_423871|2020-03-18																															Scotland/CVR2303/2020|EPI_ISL_477896|2020-04-12	C203T		Russia/StPetersburg-RII7319V/2020|EPI_ISL_450249|2020-04-21	1
England/20126001204/2020|EPI_ISL_423863|2020-03-17																															Japan/PG-0256/2020|EPI_ISL_479941|2020-03-21	C203T		India/InStem_NCBS_0086/2020|EPI_ISL_486835|2020	1
England/20124028706/2020|EPI_ISL_423855|2020-03-17																															Kenya/D5/2020|EPI_ISL_457999|2020-05-22	C203T		Japan/Donner17/2020|EPI_ISL_438961|2020-04-11	1
England/20132108004/2020|EPI_ISL_423847|2020-03-23																															USA/TX-HMH0234/2020|EPI_ISL_434891|2020-03-24	C203T		England/CAMB-1B1E6D/2020|EPI_ISL_458528|2020-05-09	1
England/20132105704/2020|EPI_ISL_423839|2020-03-23																															Israel/CVL-n-6140/2020|EPI_ISL_474981|2020-03-15	C203A		England/NORT-28258D/2020|EPI_ISL_488670|2020-03-26	1
England/20132098804/2020|EPI_ISL_423831|2020-03-23																															England/CAMB-1B3EB6/2020|EPI_ISL_473451|2020-06-09	C203T		England/NORT-295A5B/2020|EPI_ISL_488598|2020-04-03	1
England/20132091704/2020|EPI_ISL_423823|2020-03-22																															England/CAMB-1AED2A/2020|EPI_ISL_448076|2020-05-06	C203T		England/NORT-297707/2020|EPI_ISL_488030|2020-04-22	1
England/20132080004/2020|EPI_ISL_423803|2020-03-24																															Wuhan/HB-WH2-146/2020|EPI_ISL_455370|2020-02-24	C203G		England/CAMB-1AFCA4/2020|EPI_ISL_459238|2020-05-04	1
Canada/BC_07911261/2020|EPI_ISL_477095|2020-04																															England/LIVE-9C8A7/2020|EPI_ISL_449590|2020-03-23	C203T		England/NORT-29260F/2020|EPI_ISL_489108|2020-05-12	1
Canada/BC_02018462/2020|EPI_ISL_477087|2020-03																															England/LIVE-9B5CF/2020|EPI_ISL_449466|2020-03-25	C203T		Scotland/CVR475/2020|EPI_ISL_439081|2020-03-23	1
Canada/BC_10404688/2020|EPI_ISL_477079|2020-03																															England/LIVE-9B240/2020|EPI_ISL_449423|2020-03-27	C203T		Scotland/CVR2664/2020|EPI_ISL_478012|2020-04-17	1
Canada/BC_09625012/2020|EPI_ISL_477071|2020-05																															England/LIVE-9C072/2020|EPI_ISL_449503|2020-03-25	C203T		Scotland/CVR2255/2020|EPI_ISL_477886|2020-04-12	1
Canada/BC_08312782/2020|EPI_ISL_477063|2020-05																															Russia/StPetersburg-RII7319V/2020|EPI_ISL_450249|2020-04-21	C203T		Scotland/CVR2778/2020|EPI_ISL_473560|2020-04-20	1
Canada/BC_04806311/2020|EPI_ISL_477055|2020-05																															India/InStem_NCBS_0086/2020|EPI_ISL_486835|2020	C203T		Japan/Donner20/2020|EPI_ISL_438964|2020-04-14	1
Canada/BC_04583818/2020|EPI_ISL_477047|2020-05																															Japan/Donner17/2020|EPI_ISL_438961|2020-04-11	C203T		Japan/PG-0286/2020|EPI_ISL_479965|2020-03-23	1
Canada/BC_00740314/2020|EPI_ISL_477039|2020-05																															England/CAMB-1B1E6D/2020|EPI_ISL_458528|2020-05-09	C203T		Sweden/20-06306/2020|EPI_ISL_434651|2020-03-23	1
Canada/BC_22422949/2020|EPI_ISL_477031|2020-04																															England/NORT-28258D/2020|EPI_ISL_488670|2020-03-26	C203T		Wuhan/HB-WH5-224/2020|EPI_ISL_454969|2020-03-16	1
Canada/BC_21355315/2020|EPI_ISL_477023|2020-04																															England/NORT-295A5B/2020|EPI_ISL_488598|2020-04-03	C203T		USA/NY-NYUMC274/2020|EPI_ISL_428788|2020-04-06	1
Ecuador/USFQ-004/2020|EPI_ISL_477014|2020-03-30																															England/NORT-297707/2020|EPI_ISL_488030|2020-04-22	C203T		England/OXON-AC9ED/2020|EPI_ISL_448501|2020-04-07	1
England/20132090504/2020|EPI_ISL_423819|2020-03-23																															England/CAMB-1AFCA4/2020|EPI_ISL_459238|2020-05-04	C203T		England/CAMB-1AFD1A/2020|EPI_ISL_452876|2020-05-13	1
England/20132081404/2020|EPI_ISL_423811|2020-03-23																															England/NORT-29260F/2020|EPI_ISL_489108|2020-05-12	C203T		Guangdong/2020XN4291-P0038/2020|EPI_ISL_413889|2020-01-30	1
England/20124095702/2020|EPI_ISL_418730|2020-03-18																															Scotland/CVR475/2020|EPI_ISL_439081|2020-03-23	C203T		England/CAMB-1B0B58/2020|EPI_ISL_452944|2020-05-15	1
England/20124037902/2020|EPI_ISL_418721|2020-03-18																															Scotland/CVR2664/2020|EPI_ISL_478012|2020-04-17	C203T		Wuhan/HB-WH1-144/2020|EPI_ISL_455368|2020-02-23	1
England/20124035502/2020|EPI_ISL_418713|2020-03-17																															Scotland/CVR2255/2020|EPI_ISL_477886|2020-04-12	C203T		England/LIVE-9A584/2020|EPI_ISL_449347|2020-03-26	1
England/20124022802/2020|EPI_ISL_418705|2020-03-17																															Scotland/CVR2778/2020|EPI_ISL_473560|2020-04-20	C203T		Wales/PHWC-26B8B/2020|EPI_ISL_422213|2020-03-28	1
Canada/BC_10601737/2020|EPI_ISL_477117|2020-04																															Japan/Donner20/2020|EPI_ISL_438964|2020-04-14	C203T		Guangzhou/GZMU0042/2020|EPI_ISL_414688|2020-02-25	1
Canada/BC_09025513/2020|EPI_ISL_477109|2020-04																															Japan/PG-0286/2020|EPI_ISL_479965|2020-03-23	C203T		England/LIVE-9BF0D/2020|EPI_ISL_449488|2020-03-25	1
Canada/BC_07920084/2020|EPI_ISL_477101|2020-04																															Sweden/20-06306/2020|EPI_ISL_434651|2020-03-23	C203T		England/CAMB-1B1E03/2020|EPI_ISL_458546|2020-05-09	1
Scotland/EDB4837/2020|EPI_ISL_453162|2020-04-02																															Wuhan/HB-WH5-224/2020|EPI_ISL_454969|2020-03-16	C203G		England/NORT-282AF7/2020|EPI_ISL_488555|2020-03-28	1
Scotland/EDB4806/2020|EPI_ISL_453154|2020-05-11																															USA/NY-NYUMC274/2020|EPI_ISL_428788|2020-04-06	C203T		England/CAMB-1AFCC2/2020|EPI_ISL_459237|2020-05-04	1
Scotland/EDB4746/2020|EPI_ISL_453146|2020-05-11																															England/OXON-AC9ED/2020|EPI_ISL_448501|2020-04-07	C203T		Scotland/CVR2533/2020|EPI_ISL_477963|2020-04-15	1
Scotland/EDB4729/2020|EPI_ISL_453138|2020-04-28																															England/CAMB-1AFD1A/2020|EPI_ISL_452876|2020-05-13	C203T		Scotland/GCVR-173ABE/2020|EPI_ISL_459128|2020-04-07	1
Scotland/EDB4453/2020|EPI_ISL_453129|2020-05-05																															Guangdong/2020XN4291-P0038/2020|EPI_ISL_413889|2020-01-30	C203G		Scotland/CVR2234/2020|EPI_ISL_477877|2020-04-12	1
Scotland/EDB4329/2020|EPI_ISL_453121|2020-04-24																															England/CAMB-1B0B58/2020|EPI_ISL_452944|2020-05-15	C203T		Japan/Donner18/2020|EPI_ISL_438962|2020-04-13	1
Scotland/EDB4182/2020|EPI_ISL_453112|2020-04-20																															Wuhan/HB-WH1-144/2020|EPI_ISL_455368|2020-02-23	C203G		Scotland/CVR3857/2020|EPI_ISL_484660|2020-06-08	1
Scotland/EDB4006/2020|EPI_ISL_453104|2020-04-14																															England/LIVE-9A584/2020|EPI_ISL_449347|2020-03-26	C203T		Scotland/GCVR-1718C5/2020|EPI_ISL_489695|2020-03-28	1
England/20126045602/2020|EPI_ISL_418767|2020-03-18																															Wales/PHWC-26B8B/2020|EPI_ISL_422213|2020-03-28	C203A		Scotland/CVR3069/2020|EPI_ISL_461653|2020-04-24	1
England/20126026202/2020|EPI_ISL_418759|2020-03-18																															Guangzhou/GZMU0042/2020|EPI_ISL_414688|2020-02-25	C203G		Guangzhou/GZMU0050/2020|EPI_ISL_429095|2020-02-08	1
England/20126007102/2020|EPI_ISL_418751|2020-03-18																															England/LIVE-9BF0D/2020|EPI_ISL_449488|2020-03-25	C203T		England/LIVE-99109/2020|EPI_ISL_439692|2020-04-06	1
England/20126003802/2020|EPI_ISL_418743|2020-03-17																															England/CAMB-1B1E03/2020|EPI_ISL_458546|2020-05-09	C203T		England/LIVE-99B56/2020|EPI_ISL_439802|2020-04-11	1
USA/NM-UNM-00166/2020|EPI_ISL_467661|2020-04-04																															England/NORT-282AF7/2020|EPI_ISL_488555|2020-03-28	C203T		England/CAMB-781A6/2020|EPI_ISL_433703|2020-04-04	1
USA/NM-UNM-00142/2020|EPI_ISL_467653|2020-04-03																															England/CAMB-1AFCC2/2020|EPI_ISL_459237|2020-05-04	C203T		England/CAMB-1B2BCF/2020|EPI_ISL_456709|2020-05-19	1
USA/NM-UNM-00118/2020|EPI_ISL_467645|2020-04-02																															Scotland/CVR2533/2020|EPI_ISL_477963|2020-04-15	C203T		England/20190142001/2020|EPI_ISL_465593|2020-05-04	1
USA/NM-UNM-00016/2020|EPI_ISL_467598|2020-03-14																															Scotland/GCVR-173ABE/2020|EPI_ISL_459128|2020-04-07	C203T		Sweden/20-50936/2020|EPI_ISL_475163|2020-04-21	1
USA/NM-UNM-00007/2020|EPI_ISL_467590|2020-03-14																															Scotland/CVR2234/2020|EPI_ISL_477877|2020-04-12	C203T		Sweden/20-50673/2020|EPI_ISL_475155|2020-04-06	1
Scotland/CVR2272/2020|EPI_ISL_453039|2020-04-12																															Japan/Donner18/2020|EPI_ISL_438962|2020-04-13	C203T		Wuhan/HB-WH1-139/2020|EPI_ISL_455367|2020-02-23	1
Scotland/CVR2237/2020|EPI_ISL_453030|2020-04-12																															Scotland/CVR3857/2020|EPI_ISL_484660|2020-06-08	C203T		England/LIVE-9A654/2020|EPI_ISL_449357|2020-03-29	1
Scotland/CVR2032/2020|EPI_ISL_453016|2020-04-09																															Scotland/GCVR-1718C5/2020|EPI_ISL_489695|2020-03-28	C203T		England/LIVE-9A4E1/2020|EPI_ISL_449339|2020-03-25	1
England/20124009602/2020|EPI_ISL_418696|2020-03-18																															Scotland/CVR3069/2020|EPI_ISL_461653|2020-04-24	C203T		Wuhan/HB-WHCM2-282/2020|EPI_ISL_455013|2020-02-24	1
England/20124002102/2020|EPI_ISL_418688|2020-03-17																															Guangzhou/GZMU0050/2020|EPI_ISL_429095|2020-02-08	C203G		England/LIVE-9C8F2/2020|EPI_ISL_449595|2020-03-24	1
England/20122119202/2020|EPI_ISL_418679|2020-03-17																															England/LIVE-99109/2020|EPI_ISL_439692|2020-04-06	C203T		Japan/Donner38/2020|EPI_ISL_469296|2020-04-15	1
England/20119026102/2020|EPI_ISL_418671|2020-03-13																															England/LIVE-99B56/2020|EPI_ISL_439802|2020-04-11	C203T		England/CAMB-1B16DE/2020|EPI_ISL_458574|2020-05-09	1
USA/NM-UNM-00106/2020|EPI_ISL_467641|2020-04-02																															England/CAMB-781A6/2020|EPI_ISL_433703|2020-04-04	C203T		England/NORT-294C29/2020|EPI_ISL_488596|2020-03-28	1
USA/NM-UNM-00086/2020|EPI_ISL_467633|2020-04-01																															England/CAMB-1B2BCF/2020|EPI_ISL_456709|2020-05-19	C203T		England/NORT-296771/2020|EPI_ISL_488048|2020-04-25	1
USA/NM-UNM-00044/2020|EPI_ISL_467625|2020-03-20																															England/20190142001/2020|EPI_ISL_465593|2020-05-04	C203T		England/NORT-296CBE/2020|EPI_ISL_484277|2020-04-28	1
USA/NM-UNM-00036/2020|EPI_ISL_467617|2020-03-19																															Sweden/20-50936/2020|EPI_ISL_475163|2020-04-21	C203T		England/CAMB-1AFDB0/2020|EPI_ISL_459170|2020-05-04	1
USA/NM-UNM-00028/2020|EPI_ISL_467609|2020-03-17																															Sweden/20-50673/2020|EPI_ISL_475155|2020-04-06	C203T		Scotland/CVR134/2020|EPI_ISL_425677|2020-03-16	1
USA/NY-NYUMC25/2020|EPI_ISL_418971|2020-03-16																															Wuhan/HB-WH1-139/2020|EPI_ISL_455367|2020-02-23	C203G		England/LOND-D6531/2020|EPI_ISL_487550|2020-04-22	1
USA/CA-SR0431/2020|EPI_ISL_467961|2020-03-19																															England/LIVE-9A654/2020|EPI_ISL_449357|2020-03-29	C203T		England/BRIS-12D8B9/2020|EPI_ISL_481912|2020-05-06	1
USA/CA-SR0419/2020|EPI_ISL_467953|2020-03-30																															England/LIVE-9A4E1/2020|EPI_ISL_449339|2020-03-25	C203T		Scotland/CVR2534/2020|EPI_ISL_477964|2020-04-15	1
USA/CT-Yale-053/2020|EPI_ISL_428374|2020-03-30																															Wuhan/HB-WHCM2-282/2020|EPI_ISL_455013|2020-02-24	C203G		India/DRDE_4022/2020|EPI_ISL_476890|2020-05-16	1
USA/NY-NYUMC34/2020|EPI_ISL_418980|2020-03-17																															England/LIVE-9C8F2/2020|EPI_ISL_449595|2020-03-24	C203T		India/AR21/2020|EPI_ISL_508169|2020-05-21	1
Singapore/488/2020|EPI_ISL_477182|2020-04-13																															Japan/Donner38/2020|EPI_ISL_469296|2020-04-15	C203T		Sweden/20-51849/2020|EPI_ISL_510855|2020-06-01	1
Senegal/64163/2020|EPI_ISL_477159|2020-06-12																															England/CAMB-1B16DE/2020|EPI_ISL_458574|2020-05-09	C203T		Sweden/20-50934/2020|EPI_ISL_510819|2020-04-21	1
Senegal/55703/2020|EPI_ISL_477148|2020-06-07																															England/NORT-294C29/2020|EPI_ISL_488596|2020-03-28	C203T		Sweden/20-08910/2020|EPI_ISL_510816|2020-05-28	1
USA/CA-SR0463/2020|EPI_ISL_467984|2020-05-19																															England/NORT-296771/2020|EPI_ISL_488048|2020-04-25	C203T		Sweden/20-52079/2020|EPI_ISL_510876|2020-06-15	1
USA/CA-SR0453/2020|EPI_ISL_467976|2020-05-19																															England/NORT-296CBE/2020|EPI_ISL_484277|2020-04-28	C203T		India/GA30/2020|EPI_ISL_511931|2020-06-17	1
USA/CA-SR0443/2020|EPI_ISL_467968|2020-03-12																															England/CAMB-1AFDB0/2020|EPI_ISL_459170|2020-05-04	C203T		England/LIVE-A56ED/2020|EPI_ISL_500142|2020-03-20	1
Scotland/EDB5110/2020|EPI_ISL_453190|2020-03-31																															England/NORT-29DD4B/2020|EPI_ISL_484316|2020-05-07	C203T		England/LIVE-A68D7/2020|EPI_ISL_499520|2020-03-19	1
Scotland/EDB5020/2020|EPI_ISL_453182|2020-05-15																															Scotland/CVR134/2020|EPI_ISL_425677|2020-03-16	C203T		Portugal/PT0772/2020|EPI_ISL_511031|2020-05-17	1
Scotland/EDB4890/2020|EPI_ISL_453174|2020-05-13																															England/LOND-D6531/2020|EPI_ISL_487550|2020-04-22	C203T		Sweden/20-51853/2020|EPI_ISL_510857|2020-06-01	1
USA/CT-Yale-092/2020|EPI_ISL_428396|2020-04-07																															England/BRIS-12D8B9/2020|EPI_ISL_481912|2020-05-06	C203T		Sweden/20-51848/2020|EPI_ISL_510854|2020-06-01	1
USA/CT-Yale-058/2020|EPI_ISL_428388|2020-03-28																															Scotland/CVR2534/2020|EPI_ISL_477964|2020-04-15	C203T		India/S73/2020|EPI_ISL_508463|2020-05-26	1
Canada/BC_9574898/2020|EPI_ISL_418859|2020-03-13																															India/DRDE_4022/2020|EPI_ISL_476890|2020-05-16	C203T		India/AR15/2020|EPI_ISL_508162|2020-05-24	1
Canada/BC_8159203/2020|EPI_ISL_418848|2020-03-05																															India/AR21/2020|EPI_ISL_508169|2020-05-21	C203T		India/S92/2020|EPI_ISL_508481|2020-05-25	1
Canada/BC_6502001/2020|EPI_ISL_418840|2020-03-12																															Sweden/20-51849/2020|EPI_ISL_510855|2020-06-01	C203T		England/LIVE-A55B3/2020|EPI_ISL_500129|2020-03-20	1
Canada/BC_5306970/2020|EPI_ISL_418833|2020-03-11																															Sweden/20-50934/2020|EPI_ISL_510819|2020-04-21	C203T		England/LIVE-A6497/2020|EPI_ISL_499712|2020-03-18	1
Canada/BC_4118226/2020|EPI_ISL_418825|2020-03-10																															Sweden/20-08910/2020|EPI_ISL_510816|2020-05-28	C203T		England/LIVE-A60B1/2020|EPI_ISL_499682|2020-03-21	1
Canada/BC_0554880/2020|EPI_ISL_418817|2020-03-13																															Sweden/20-52079/2020|EPI_ISL_510876|2020-06-15	C203T		USA/UT-03831/2020|EPI_ISL_509597|2020-04-01	1
Spain/COV003664/2020|EPI_ISL_467254|2020-04-01																															India/GA30/2020|EPI_ISL_511931|2020-06-17	C203T		England/LIVE-A69E3/2020|EPI_ISL_499762|2020-03-16	1
Spain/COV002723/2020|EPI_ISL_467295|2020-04-07																															England/LIVE-A56ED/2020|EPI_ISL_500142|2020-03-20	C203T		England/NORT-29CDA6/2020|EPI_ISL_499792|2020-05-01	1
Spain/COV002722/2020|EPI_ISL_467287|2020-04-07																															England/LIVE-A68D7/2020|EPI_ISL_499520|2020-03-19	C203T		Sweden/20-51894/2020|EPI_ISL_510859|2020-05-25	1
Spain/COV002718/2020|EPI_ISL_467279|2020-04-07																															Portugal/PT0772/2020|EPI_ISL_511031|2020-05-17	C203T		Sweden/20-51852/2020|EPI_ISL_510856|2020-06-01	1
Spain/COV002716/2020|EPI_ISL_467271|2020-04-08																															Sweden/20-51853/2020|EPI_ISL_510857|2020-06-01	C203T		Sweden/20-51847/2020|EPI_ISL_510853|2020-06-01	1
Spain/COV002749/2020|EPI_ISL_467262|2020-04-14																															Sweden/20-51848/2020|EPI_ISL_510854|2020-06-01	C203T		Sweden/20-51278/2020|EPI_ISL_510823|2020-05-05	1
Spain/COV003695/2020|EPI_ISL_467243|2020-04-02																															India/S73/2020|EPI_ISL_508463|2020-05-26	C203T		India/S70/2020|EPI_ISL_508460|2020-05-25	1
Spain/COV003702/2020|EPI_ISL_467235|2020-04-02																															India/AR15/2020|EPI_ISL_508162|2020-05-24	C203T		India/AR58/2020|EPI_ISL_508194|2020-05-21	1
Spain/COV003707/2020|EPI_ISL_467227|2020-04-02																															India/S92/2020|EPI_ISL_508481|2020-05-25	C203T		England/LIVE-A5647/2020|EPI_ISL_500135|2020-03-20	1
Spain/COV003681/2020|EPI_ISL_467219|2020-04-02																															England/LIVE-A55B3/2020|EPI_ISL_500129|2020-03-20	C203T		USA/WA-S2684/2020|EPI_ISL_497316|2020-06-22	1
Spain/COV003701/2020|EPI_ISL_467211|2020-04-02																															England/LIVE-A6497/2020|EPI_ISL_499712|2020-03-18	C203T		England/LIVE-A5568/2020|EPI_ISL_500126|2020-03-21	1
England/CAMB-7B48C/2020|EPI_ISL_433961|2020-04-12																															England/LIVE-A60B1/2020|EPI_ISL_499682|2020-03-21	C203T		England/LIVE-A587E/2020|EPI_ISL_499641|2020-03-20	1
England/CAMB-7B3F8/2020|EPI_ISL_433953|2020-04-13																															USA/UT-03831/2020|EPI_ISL_509597|2020-04-01	C203T		Switzerland/200066_619_C03/2020|EPI_ISL_510747|2020-07-15	1
England/CAMB-7B2BF/2020|EPI_ISL_433937|2020-04-12																															England/LIVE-A69E3/2020|EPI_ISL_499762|2020-03-16	C203T		USA/MI-MDHHS-SC21150/2020|EPI_ISL_507926|2020-03-26	1
England/CAMB-7B1C1/2020|EPI_ISL_433929|2020-04-12																															England/NORT-29CDA6/2020|EPI_ISL_499792|2020-05-01	C203T		England/NORT-29E20F/2020|EPI_ISL_493509|2020-05-04	1
England/CAMB-7B12B/2020|EPI_ISL_433921|2020-04-11																															Sweden/20-51894/2020|EPI_ISL_510859|2020-05-25	C203T		England/NORT-29E3FD/2020|EPI_ISL_493516|2020-04-30	1
Oman/RESP-20-4810/2020|EPI_ISL_457992|2020-03-22																															Sweden/20-51852/2020|EPI_ISL_510856|2020-06-01	C203T		England/NORT-29C7E4/2020|EPI_ISL_499788|2020-04-22	1
Oman/RESP-20-3515/2020|EPI_ISL_457980|2020-03-18																															Sweden/20-51847/2020|EPI_ISL_510853|2020-06-01	C203T		England/CAMB-1B0693/2020|EPI_ISL_452906|2020-05-07	1
Oman/RESP-20-1976/2020|EPI_ISL_457938|2020-03-15																															Sweden/20-51278/2020|EPI_ISL_510823|2020-05-05	C203T		Wales/PHWC-165958/2020|EPI_ISL_490744|2020-05-15	1
England/CAMB-7BFF4/2020|EPI_ISL_433978|2020-04-13																															India/S70/2020|EPI_ISL_508460|2020-05-25	C203T		England/CAMB-1B1841/2020|EPI_ISL_458554|2020-05-10	1
England/CAMB-7B510/2020|EPI_ISL_433970|2020-04-13																															India/AR58/2020|EPI_ISL_508194|2020-05-21	C203T		Scotland/CVR3657/2020|EPI_ISL_478086|2020-05-21	1
England/CAMB-7B3BC/2020|EPI_ISL_433949|2020-04-12																															England/LIVE-A5647/2020|EPI_ISL_500135|2020-03-20	C203T		Wales/PHWC-1655DC/2020|EPI_ISL_484685|2020-06-26	1
England/CAMB-7B10D/2020|EPI_ISL_433919|2020-04-11																															USA/WA-S2684/2020|EPI_ISL_497316|2020-06-22	C203T		Senegal/382/2020|EPI_ISL_420073|2020-03-19	1
England/CAMB-7B088/2020|EPI_ISL_433911|2020-04-11																															England/LIVE-A5568/2020|EPI_ISL_500126|2020-03-21	C203T		Wales/PHWC-1649E0/2020|EPI_ISL_479333|2020-06-11	1
England/CAMB-7AFB9/2020|EPI_ISL_433903|2020-04-10																															England/LIVE-A587E/2020|EPI_ISL_499641|2020-03-20	C203T		Wales/PHWC-1659EF/2020|EPI_ISL_490751|2020-06-18	1
Egypt/MASRI-012/2020|EPI_ISL_482763|2020-05-05																															Switzerland/200066_619_C03/2020|EPI_ISL_510747|2020-07-15	C203T		England/CAMB-1B1C27/2020|EPI_ISL_458562|2020-05-07	1
Spain/COV001525/2020|EPI_ISL_467167|2020-03-17																															USA/MI-MDHHS-SC21150/2020|EPI_ISL_507926|2020-03-26	C203T		Wales/PHWC-162B37/2020|EPI_ISL_473166|2020-05-27	1
Spain/COV001528/2020|EPI_ISL_467159|2020-03-13																															England/NORT-29E20F/2020|EPI_ISL_493509|2020-05-04	C203T		England/CAMB-1B0718/2020|EPI_ISL_452914|2020-05-07	1
Spain/COV001561/2020|EPI_ISL_467151|2020-03-16																															England/NORT-29E3FD/2020|EPI_ISL_493516|2020-04-30	C203T		England/20169030304/2020|EPI_ISL_465225|2020-04-15	1
Spain/COV001435/2020|EPI_ISL_467143|2020-03-18																															England/NORT-29C7E4/2020|EPI_ISL_499788|2020-04-22	C203T		Wales/PHWC-162C70/2020|EPI_ISL_473183|2020-05-27	1
Spain/COV001524/2020|EPI_ISL_467135|2020-03-19																															England/CAMB-1B0693/2020|EPI_ISL_452906|2020-05-07	G206T		Scotland/CVR3502/2020|EPI_ISL_456887|2020-05-10	1
Spain/COV001601/2020|EPI_ISL_467126|2020-03-12																															Wales/PHWC-165958/2020|EPI_ISL_490744|2020-05-15	G206T		Switzerland/101142/2020|EPI_ISL_451809|2020-03-31	1
Spain/COV001504/2020|EPI_ISL_467112|2020-03-19																															England/CAMB-1B1841/2020|EPI_ISL_458554|2020-05-10	G206T		Wales/PHWC-165FFC/2020|EPI_ISL_490825|2020-06-12	1
Spain/COV001583/2020|EPI_ISL_467104|2020-03-14																															Scotland/CVR3657/2020|EPI_ISL_478086|2020-05-21	G206A		Wales/PHWC-165ACE/2020|EPI_ISL_490763|2020-06-27	1
USA/DC-HP00052/2020|EPI_ISL_457796|2020-03-07																															Wales/PHWC-1655DC/2020|EPI_ISL_484685|2020-06-26	G206T		Fujian/IM3520004T/2020|EPI_ISL_431292|2020-03-18	1
USA/MD-HP00159/2020|EPI_ISL_457788|2020-03-23																															Senegal/382/2020|EPI_ISL_420073|2020-03-19	G206T		England/CAMB-1B1CCD/2020|EPI_ISL_458551|2020-05-07	1
USA/MD-HP00150/2020|EPI_ISL_457780|2020-03-30																															Wales/PHWC-1649E0/2020|EPI_ISL_479333|2020-06-11	G206T		England/CAMB-1B1CBE/2020|EPI_ISL_458541|2020-05-10	1
USA/MD-HP00140/2020|EPI_ISL_457772|2020-03-22																															Wales/PHWC-1659EF/2020|EPI_ISL_490751|2020-06-18	G206T		England/CAMB-1B1C45/2020|EPI_ISL_458522|2020-05-07	1
England/CAMB-7C12A/2020|EPI_ISL_433997|2020-04-13																															England/CAMB-1B1C27/2020|EPI_ISL_458562|2020-05-07	G206T		Scotland/CVR3501/2020|EPI_ISL_456886|2020-05-10	1
England/CAMB-7C096/2020|EPI_ISL_433988|2020-04-13																															Wales/PHWC-162B37/2020|EPI_ISL_473166|2020-05-27	G206T		Belgium/rega-0503483/2020|EPI_ISL_476999|2020-05-03	1
Spain/COV003651/2020|EPI_ISL_467204|2020-04-01																															England/CAMB-1B0718/2020|EPI_ISL_452914|2020-05-07	G206T		Wales/PHWC-164DA8/2020|EPI_ISL_479380|2020-05-25	1
Spain/COV003650/2020|EPI_ISL_467196|2020-04-01																															England/20169030304/2020|EPI_ISL_465225|2020-04-15	G206T		Australia/WA21/2020|EPI_ISL_470839|2020-04-28	1
Spain/COV003669/2020|EPI_ISL_467188|2020-04-01																															Wales/PHWC-162C70/2020|EPI_ISL_473183|2020-05-27	G206T		Scotland/CVR3500/2020|EPI_ISL_456885|2020-05-10	1
Spain/COV001574/2020|EPI_ISL_467180|2020-03-14																															Scotland/CVR3502/2020|EPI_ISL_456887|2020-05-10	G206A		Wales/PHWC-1655FA/2020|EPI_ISL_484687|2020-06-27	1
Spain/COV001558/2020|EPI_ISL_467172|2020-03-12																															Switzerland/101142/2020|EPI_ISL_451809|2020-03-31	G206T		Wales/PHWC-160E4F/2020|EPI_ISL_473058|2020-05-17	1
USA/DC-HP00117/2020|EPI_ISL_457810|2020-03-28																															Wales/PHWC-165FFC/2020|EPI_ISL_490825|2020-06-12	G206T		Wales/PHWC-16096C/2020|EPI_ISL_472998|2020-05-23	1
England/CAMB-7AF22/2020|EPI_ISL_433895|2020-04-10																															Wales/PHWC-165ACE/2020|EPI_ISL_490763|2020-06-27	G206T		Wales/PHWC-15E59A/2020|EPI_ISL_472821|2020-05-15	1
England/CAMB-7AE9E/2020|EPI_ISL_433887|2020-04-09																															Fujian/IM3520004T/2020|EPI_ISL_431292|2020-03-18	G206T		England/CAMB-1B1BC0/2020|EPI_ISL_458548|2020-05-07	1
England/CAMB-7AB1F/2020|EPI_ISL_433841|2020-04-08																															England/CAMB-1B1CCD/2020|EPI_ISL_458551|2020-05-07	G206T		England/NORT-29C9DF/2020|EPI_ISL_488166|2020-04-30	1
England/CAMB-7AA8B/2020|EPI_ISL_433833|2020-04-08																															England/CAMB-1B1CBE/2020|EPI_ISL_458541|2020-05-10	G206T		Scotland/CVR3499/2020|EPI_ISL_456884|2020-05-10	1
England/CAMB-79B10/2020|EPI_ISL_433825|2020-03-27																															England/CAMB-1B1C45/2020|EPI_ISL_458522|2020-05-07	G206T		Belgium/rega-0502481/2020|EPI_ISL_476997|2020-05-02	1
England/CAMB-79A5F/2020|EPI_ISL_433816|2020-03-27																															Scotland/CVR3501/2020|EPI_ISL_456886|2020-05-10	G206A		Wales/PHWC-165633/2020|EPI_ISL_484691|2020-06-27	1
England/CAMB-78A14/2020|EPI_ISL_433807|2020																															Belgium/rega-0503483/2020|EPI_ISL_476999|2020-05-03	G206A		Wales/PHWC-16029E/2020|EPI_ISL_472914|2020-05-17	1
Switzerland/42176771/2020|EPI_ISL_418285|2020-03-04																															Wales/PHWC-164DA8/2020|EPI_ISL_479380|2020-05-25	G206T		England/CAMB-1B06B1/2020|EPI_ISL_452908|2020	1
Switzerland/42174724/2020|EPI_ISL_418277|2020-03-03																															Australia/WA21/2020|EPI_ISL_470839|2020-04-28	G206T		England/CAMB-1B06DF/2020|EPI_ISL_452910|2020-05-07	1
Senegal/119/2020|EPI_ISL_418215|2020-03-12																															Scotland/CVR3500/2020|EPI_ISL_456885|2020-05-10	G206A		Wales/PHWC-15E8CE/2020|EPI_ISL_472841|2020-05-14	1
USA/NY-NYUMC17/2020|EPI_ISL_418202|2020-03-17																															Wales/PHWC-1655FA/2020|EPI_ISL_484687|2020-06-27	G206T		Wales/PHWC-164C7E/2020|EPI_ISL_479365|2020-06-11	1
USA/DC-HP00137/2020|EPI_ISL_457823|2020-03-21																															Wales/PHWC-160E4F/2020|EPI_ISL_473058|2020-05-17	G206T		England/CAMB-1B1C90/2020|EPI_ISL_458536|2020-05-10	1
USA/MD-HP00123/2020|EPI_ISL_457815|2020-03-19																															Wales/PHWC-16096C/2020|EPI_ISL_472998|2020-05-23	G206T		Wales/PHWC-165615/2020|EPI_ISL_484689|2020-06-28	1
USA/MD-HP00061/2020|EPI_ISL_457803|2020-03-16																															Wales/PHWC-15E59A/2020|EPI_ISL_472821|2020-05-15	G206T		England/CAMB-1B0745/2020|EPI_ISL_452917|2020-05-07	1
England/CAMB-7AE25/2020|EPI_ISL_433881|2020-04-09																															England/CAMB-1B1BC0/2020|EPI_ISL_458548|2020-05-07	G206T		Finland/2A10SVIIC/2020|EPI_ISL_481650|2020-04-02	1
England/CAMB-7AD82/2020|EPI_ISL_433873|2020-04-08																															England/NORT-29C9DF/2020|EPI_ISL_488166|2020-04-30	G206T		Wales/PHWC-165B70/2020|EPI_ISL_490772|2020-06-12	1
England/CAMB-7ACD0/2020|EPI_ISL_433865|2020-04-08																															Scotland/CVR3499/2020|EPI_ISL_456884|2020-05-10	G206A		England/CAMB-1B188D/2020|EPI_ISL_458565|2020-05-07	1
England/CAMB-7ABC4/2020|EPI_ISL_433849|2020-04-07																															Belgium/rega-0502481/2020|EPI_ISL_476997|2020-05-02	G206A		England/CAMB-1B1CAF/2020|EPI_ISL_458555|2020-05-07	1
Ireland/21145/2020|EPI_ISL_418548|2020-03-06																															Scotland/CVR3890/2020|EPI_ISL_484675|2020-06-15	G206A		Belgium/rega-0414478/2020|EPI_ISL_476988|2020-04-14	1
USA/NY-NYUMC901/2020|EPI_ISL_467394|2020-04-26																															Wales/PHWC-165633/2020|EPI_ISL_484691|2020-06-27	G206T		Wales/PHWC-165606/2020|EPI_ISL_484688|2020-06-27	1
USA/NY-NYUMC885/2020|EPI_ISL_467378|2020-04-25																															Wales/PHWC-16029E/2020|EPI_ISL_472914|2020-05-17	G206T		Wales/PHWC-16683C/2020|EPI_ISL_494047|2020-06-27	1
Canada/BC_14592296/2020|EPI_ISL_467428|2020-04																															England/CAMB-1B06B1/2020|EPI_ISL_452908|2020	G206T		Wales/PHWC-166F64/2020|EPI_ISL_494133|2020-06-27	1
USA/NY-NYUMC927/2020|EPI_ISL_467420|2020-03-17																															England/CAMB-1B06DF/2020|EPI_ISL_452910|2020-05-07	G206T		Wales/PHWC-166C8B/2020|EPI_ISL_494099|2020-06-27	1
USA/NY-NYUMC919/2020|EPI_ISL_467412|2020-03-18																															Wales/PHWC-15E8CE/2020|EPI_ISL_472841|2020-05-14	G206T		Wales/PHWC-168973/2020|EPI_ISL_494310|2020-05-28	1
USA/CA-CZB0133/2020|EPI_ISL_428995|2020-04-08																															Wales/PHWC-164C7E/2020|EPI_ISL_479365|2020-06-11	G206T		Wales/PHWC-166B8E/2020|EPI_ISL_494088|2020-06-27	1
Russia/Sverdlovsk-86704/2020|EPI_ISL_428922|2020-03-30																															England/CAMB-1B1C90/2020|EPI_ISL_458536|2020-05-10	G206T		Wales/PHWC-16691B/2020|EPI_ISL_494060|2020-06-27	1
Russia/Buryatia-87104/2020|EPI_ISL_428914|2020-03-30																															Wales/PHWC-165615/2020|EPI_ISL_484689|2020-06-28	G206T		Wales/PHWC-1668E1/2020|EPI_ISL_494057|2020-06-27	1
Russia/Buryatia-84504/2020|EPI_ISL_428906|2020-03-27																															England/CAMB-1B0745/2020|EPI_ISL_452917|2020-05-07	G206T		Wales/PHWC-16676C/2020|EPI_ISL_494036|2020-06-27	1
Switzerland/42202619/2020|EPI_ISL_418439|2020-03-22																															Finland/2A10SVIIC/2020|EPI_ISL_481650|2020-04-02	G206T		Wales/PHWC-1665CC/2020|EPI_ISL_494020|2020-06-27	1
USA/WA-S874/2020|EPI_ISL_463364|2020-04-16																															Wales/PHWC-165B70/2020|EPI_ISL_490772|2020-06-12	G206T		Wales/PHWC-166E58/2020|EPI_ISL_494121|2020-06-27	1
USA/WA-S866/2020|EPI_ISL_463356|2020-04-24																															England/CAMB-1B188D/2020|EPI_ISL_458565|2020-05-07	G206T		Wales/PHWC-166D2E/2020|EPI_ISL_494106|2020-06-27	1
USA/WA-S858/2020|EPI_ISL_463348|2020-04-24																															England/CAMB-1B1CAF/2020|EPI_ISL_458555|2020-05-07	G206T		Wales/PHWC-1663A4/2020|EPI_ISL_493990|2020-06-27	1
USA/WA-S850/2020|EPI_ISL_463340|2020-04-23																															Belgium/rega-0414478/2020|EPI_ISL_476988|2020-04-14	G206A		Wales/PHWC-1695AB/2020|EPI_ISL_499459|2020-06-25	1
USA/WA-S842/2020|EPI_ISL_463332|2020-04-21																															Wales/PHWC-165606/2020|EPI_ISL_484688|2020-06-27	G206T		Wales/PHWC-166A72/2020|EPI_ISL_494075|2020-06-27	1
USA/WA-S834/2020|EPI_ISL_463324|2020-04-21																															Wales/PHWC-16683C/2020|EPI_ISL_494047|2020-06-27	G206T		Wales/PHWC-1667F3/2020|EPI_ISL_494043|2020-06-27	1
Bangladesh/BCSIR-NILMRC_245/2020|EPI_ISL_487385|2020-07-06																															Wales/PHWC-166F64/2020|EPI_ISL_494133|2020-06-27	G206T		Wales/PHWC-166ACD/2020|EPI_ISL_494078|2020-06-27	1
Bangladesh/BCSIR-NILMRC_227/2020|EPI_ISL_487367|2020-07-06																															Wales/PHWC-166C8B/2020|EPI_ISL_494099|2020-06-27	G206T		England/NORT-29E3DF/2020|EPI_ISL_493515|2020-04-30	1
USA/WA-S903/2020|EPI_ISL_463393|2020-04-27																															Wales/PHWC-168973/2020|EPI_ISL_494310|2020-05-28	G206T		Wales/PHWC-166F0A/2020|EPI_ISL_494130|2020-06-27	1
USA/WA-S895/2020|EPI_ISL_463385|2020-04-24																															Wales/PHWC-166B8E/2020|EPI_ISL_494088|2020-06-27	G206T		Wales/PHWC-167060/2020|EPI_ISL_494146|2020-06-27	1
USA/WA-S887/2020|EPI_ISL_463377|2020-04-17																															Wales/PHWC-16691B/2020|EPI_ISL_494060|2020-06-27	G206T		Wales/PHWC-166C03/2020|EPI_ISL_494094|2020-06-27	1
USA/WA-S879/2020|EPI_ISL_463369|2020-04-23																															Wales/PHWC-1668E1/2020|EPI_ISL_494057|2020-06-27	G206T		Wales/PHWC-166359/2020|EPI_ISL_493985|2020-06-27	1
Canada/BC_26101196/2020|EPI_ISL_463230|2020-03																															Wales/PHWC-16676C/2020|EPI_ISL_494036|2020-06-27	G206T		Wales/PHWC-166ABE/2020|EPI_ISL_494077|2020-06-27	1
Canada/BC_25384316/2020|EPI_ISL_463222|2020-03																															Wales/PHWC-1665CC/2020|EPI_ISL_494020|2020-06-27	G206T		Wales/PHWC-166517/2020|EPI_ISL_494010|2020-06-27	1
Canada/BC_24360831/2020|EPI_ISL_463214|2020-03																															Wales/PHWC-166E58/2020|EPI_ISL_494121|2020-06-27	G206T		Wales/PHWC-166A45/2020|EPI_ISL_494072|2020-06-27	1
Canada/BC_24252365/2020|EPI_ISL_463206|2020-03																															Wales/PHWC-166D2E/2020|EPI_ISL_494106|2020-06-27	G206T		Wales/PHWC-16690C/2020|EPI_ISL_494059|2020-06-27	1
USA/WA-S664/2020|EPI_ISL_438217|2020-04-22																															Wales/PHWC-1663A4/2020|EPI_ISL_493990|2020-06-27	G206T		Wales/PHWC-166DD3/2020|EPI_ISL_494115|2020-06-27	1
USA/WA-S656/2020|EPI_ISL_438209|2020-04-21																															Wales/PHWC-1695AB/2020|EPI_ISL_499459|2020-06-25	G206T		Wales/PHWC-1695F6/2020|EPI_ISL_512485|2020-07-21	1
USA/WA-S648/2020|EPI_ISL_438201|2020-04-19																															Wales/PHWC-166A72/2020|EPI_ISL_494075|2020-06-27	G206T		Wales/PHWC-166474/2020|EPI_ISL_494001|2020-06-27	1
Russia/Kabardino-Balkaria-80501/2020|EPI_ISL_428893|2020-03-23																															Wales/PHWC-1667F3/2020|EPI_ISL_494043|2020-06-27	G206T		Wales/PHWC-1663C2/2020|EPI_ISL_493992|2020-06-27	1
Russia/Samara-73406/2020|EPI_ISL_428885|2020-03-20																															Wales/PHWC-166ACD/2020|EPI_ISL_494078|2020-06-27	G206T		Wales/PHWC-166AEB/2020|EPI_ISL_494080|2020-06-27	1
Russia/Moscow-71604/2020|EPI_ISL_428876|2020-03-19																															England/NORT-29E3DF/2020|EPI_ISL_493515|2020-04-30	G206T		Wales/PHWC-166869/2020|EPI_ISL_494050|2020-06-27	1
Russia/StPetersburg-64304/2020|EPI_ISL_428868|2020-03-13																															Wales/PHWC-166F0A/2020|EPI_ISL_494130|2020-06-27	G206T		Wales/PHWC-1663D1/2020|EPI_ISL_493993|2020-06-27	1
Russia/Moscow-62505/2020|EPI_ISL_428860|2020-03-11																															Wales/PHWC-167060/2020|EPI_ISL_494146|2020-06-27	G206T		Wales/PHWC-16666F/2020|EPI_ISL_494026|2020-06-27	1
USA/NY-NYUMC289/2020|EPI_ISL_428803|2020-04-06																															Wales/PHWC-166C03/2020|EPI_ISL_494094|2020-06-27	G206T		Wales/PHWC-166896/2020|EPI_ISL_494053|2020-06-27	1
USA/LA-BIE-050/2020|EPI_ISL_463298|2020-04-04																															Wales/PHWC-166359/2020|EPI_ISL_493985|2020-06-27	G206T		Wales/PHWC-168CE3/2020|EPI_ISL_494354|2020-05-19	1
USA/LA-BIE-042/2020|EPI_ISL_463290|2020-04-07																															Wales/PHWC-166ABE/2020|EPI_ISL_494077|2020-06-27	G206T		Wales/PHWC-166FEC/2020|EPI_ISL_494139|2020-06-27	1
Canada/BC_27279444/2020|EPI_ISL_463263|2020-03																															Wales/PHWC-166517/2020|EPI_ISL_494010|2020-06-27	G206T		Wales/PHWC-1664FC/2020|EPI_ISL_494008|2020-06-27	1
Canada/BC_26943931/2020|EPI_ISL_463255|2020-03																															Wales/PHWC-166A45/2020|EPI_ISL_494072|2020-06-27	G206T		Wales/PHWC-166C30/2020|EPI_ISL_494096|2020-06-27	1
Canada/BC_26628654/2020|EPI_ISL_463247|2020-03																															Wales/PHWC-16690C/2020|EPI_ISL_494059|2020-06-27	G206T		Wales/PHWC-166957/2020|EPI_ISL_494062|2020-06-27	1
Canada/BC_26590014/2020|EPI_ISL_463239|2020-03																															Wales/PHWC-166DD3/2020|EPI_ISL_494115|2020-06-27	G206T		Wales/PHWC-1668F0/2020|EPI_ISL_494058|2020-06-27	1
USA/DC-HP00100/2020|EPI_ISL_438245|2020-03-14																															Wales/PHWC-1695F6/2020|EPI_ISL_512485|2020-07-21	G206T		Wales/PHWC-16680F/2020|EPI_ISL_494044|2020-06-27	1
USA/DC-HP00080/2020|EPI_ISL_438237|2020-03-20																															Wales/PHWC-166474/2020|EPI_ISL_494001|2020-06-27	G206T		Wales/PHWC-16668D/2020|EPI_ISL_494028|2020-06-27	1
USA/DC-HP00070/2020|EPI_ISL_438229|2020-03-17																															Wales/PHWC-1663C2/2020|EPI_ISL_493992|2020-06-27	G206T		Wales/PHWC-166E1C/2020|EPI_ISL_494118|2020-06-27	1
USA/WA-S668/2020|EPI_ISL_438221|2020-04-22																															Wales/PHWC-166AEB/2020|EPI_ISL_494080|2020-06-27	G206T		Wales/PHWC-166D6A/2020|EPI_ISL_494109|2020-06-27	1
USA/WA-S1092/2020|EPI_ISL_463582|2020-04-29																															Wales/PHWC-166869/2020|EPI_ISL_494050|2020-06-27	G206T		Wales/PHWC-166BCA/2020|EPI_ISL_494091|2020-06-27	1
USA/WA-S1084/2020|EPI_ISL_463574|2020-04-29																															Wales/PHWC-1663D1/2020|EPI_ISL_493993|2020-06-27	G206T		England/NORT-29E5AC/2020|EPI_ISL_493519|2020-05-02	1
USA/WA-S1076/2020|EPI_ISL_463566|2020-04-30																															Wales/PHWC-16666F/2020|EPI_ISL_494026|2020-06-27	G206T		England/NORT-29D130/2020|EPI_ISL_499507|2020-05-04	1
USA/WA-S1024/2020|EPI_ISL_463514|2020-05-01																															Wales/PHWC-166896/2020|EPI_ISL_494053|2020-06-27	G206T		USA/NY-WCMP5F01P/2020|EPI_ISL_427540|2020-03-13	1
USA/WA-S1016/2020|EPI_ISL_463506|2020-04-29																															Wales/PHWC-168CE3/2020|EPI_ISL_494354|2020-05-19	G206T		USA/NY-NYUMC709/2020|EPI_ISL_451424|2020-03-20	1
USA/LA-BIE-039/2020|EPI_ISL_463287|2020-04-04																															Wales/PHWC-166FEC/2020|EPI_ISL_494139|2020-06-27	G206T		England/OXON-AFF42/2020|EPI_ISL_478837|2020-04-09	1
USA/LA-BIE-031/2020|EPI_ISL_463279|2020-04-04																															Wales/PHWC-1664FC/2020|EPI_ISL_494008|2020-06-27	G206T		India/TF25/2020|EPI_ISL_508499|2020-06-19	1
Canada/BC_27302671/2020|EPI_ISL_463271|2020-03																															Wales/PHWC-166C30/2020|EPI_ISL_494096|2020-06-27	G206T		DRC/4250/2020|EPI_ISL_471415|2020-04-28	1
England/CAMB-8115F/2020|EPI_ISL_438573|2020-04-18																															Wales/PHWC-166957/2020|EPI_ISL_494062|2020-06-27	G206T		USA/WI-UW-330/2020|EPI_ISL_436624|2020-04-26	1
England/CAMB-810BC/2020|EPI_ISL_438565|2020-04-19																															Wales/PHWC-1668F0/2020|EPI_ISL_494058|2020-06-27	G206T		DRC/7434/2020|EPI_ISL_513621|2020-05-14	1
England/CAMB-81025/2020|EPI_ISL_438557|2020-04-20																															Wales/PHWC-16680F/2020|EPI_ISL_494044|2020-06-27	G206T		DRC/6026/2020|EPI_ISL_513622|2020-05-08	1
Germany/NRW-10/2020|EPI_ISL_414574|2020-02-28																															Wales/PHWC-16668D/2020|EPI_ISL_494028|2020-06-27	G206T		DRC/5651/2020|EPI_ISL_496493|2020-05-06	1
Germany/NRW-08/2020|EPI_ISL_414508|2020-02-27																															Wales/PHWC-166E1C/2020|EPI_ISL_494118|2020-06-27	G206T		DRC/7430/2020|EPI_ISL_496517|2020-05-14	1
USA/WA-S1106/2020|EPI_ISL_463596|2020-05-04																															Wales/PHWC-166D6A/2020|EPI_ISL_494109|2020-06-27	G206T		Australia/NSW633/2020|EPI_ISL_490042|2020-07-01	1
USA/WA-S1098/2020|EPI_ISL_463588|2020-05-03																															Wales/PHWC-166BCA/2020|EPI_ISL_494091|2020-06-27	G206T		USA/VA-DCLS-0392/2020|EPI_ISL_467788|2020-04-19	1
USA/WA-S1066/2020|EPI_ISL_463556|2020-04-29																															England/NORT-29E5AC/2020|EPI_ISL_493519|2020-05-02	G206T		USA/WI-UW-444/2020|EPI_ISL_484819|2020-06-18	1
USA/WA-S1058/2020|EPI_ISL_463548|2020-04-28																															England/NORT-29D130/2020|EPI_ISL_499507|2020-05-04	G206T		USA/WI-UW-685/2020|EPI_ISL_491366|2020-06-25	1
USA/WA-S1050/2020|EPI_ISL_463540|2020-04-30																															USA/NY-WCMP5F01P/2020|EPI_ISL_427540|2020-03-13	G208T		Russia/StPetersburg-RII9304V/2020|EPI_ISL_507295|2020-04-24	1
USA/WA-S1042/2020|EPI_ISL_463532|2020-05-03																															USA/NY-NYUMC709/2020|EPI_ISL_451424|2020-03-20	G208T		USA/MI-MDHHS-SC21161/2020|EPI_ISL_507418|2020-07-01	1
USA/WA-S1034/2020|EPI_ISL_463524|2020-05-01																															England/OXON-AFF42/2020|EPI_ISL_478837|2020-04-09	G208A		USA/WA-S1694/2020|EPI_ISL_496120|2020-05-31	1
England/CAMB-81F37/2020|EPI_ISL_438596|2020-04-22																															India/TF25/2020|EPI_ISL_508499|2020-06-19	G208T		India/IK60/2020|EPI_ISL_508386|2020-05-07	1
England/CAMB-81E85/2020|EPI_ISL_438587|2020-04-22																															Northern_Ireland/NIRE-106ACF/2020|EPI_ISL_501013|2020-05-19	T209C		USA/CA-IGI-0067/2020|EPI_ISL_511821|2020-06-12	1
Germany/NRW-03/2020|EPI_ISL_414498|2020-02-26																															DRC/4250/2020|EPI_ISL_471415|2020-04-28	T210C		USA/NM-NMDOH-2020219018/2020|EPI_ISL_510881|2020-07-17	1
USA/WA-S1009/2020|EPI_ISL_463499|2020-04-30																															USA/WI-UW-330/2020|EPI_ISL_436624|2020-04-26	T210C		USA/MI-MDHHS-SC21188/2020|EPI_ISL_507445|2020-07-06	1
USA/WA-S1001/2020|EPI_ISL_463491|2020-04-28																															DRC/7434/2020|EPI_ISL_513621|2020-05-14	T210C		England/NOTT-10F659/2020|EPI_ISL_433031|2020-04-03	1
USA/WA-S993/2020|EPI_ISL_463483|2020-04-29																															DRC/6026/2020|EPI_ISL_513622|2020-05-08	T210C		England/CAMB-1B2C17/2020|EPI_ISL_456714|2020-05-18	1
USA/WA-S985/2020|EPI_ISL_463475|2020-04-18																															DRC/5651/2020|EPI_ISL_496493|2020-05-06	T210C		USA/NY-NYUMC484/2020|EPI_ISL_435549|2020-04-24	1
USA/WA-S977/2020|EPI_ISL_463467|2020-05-01																															DRC/7430/2020|EPI_ISL_496517|2020-05-14	T210C		Wales/PHWC-15E169/2020|EPI_ISL_472797|2020-05-16	1
USA/WA-S969/2020|EPI_ISL_463459|2020-05-01																															Australia/NSW633/2020|EPI_ISL_490042|2020-07-01	C211T		Wales/PHWC-15E7EF/2020|EPI_ISL_472832|2020-05-16	1
USA/WA-S961/2020|EPI_ISL_463451|2020-05-01																															USA/VA-DCLS-0392/2020|EPI_ISL_467788|2020-04-19	C211T		USA/CA-CZB-1179/2020|EPI_ISL_454629|2020-04-30	1
USA/WA-S953/2020|EPI_ISL_463443|2020-04-27																															USA/WI-UW-444/2020|EPI_ISL_484819|2020-06-18	C211T		England/CAMB-77D0D/2020|EPI_ISL_440829|2020-04-01	1
USA/WA-S945/2020|EPI_ISL_463435|2020-04-27																															USA/WI-UW-685/2020|EPI_ISL_491366|2020-06-25	C211T		England/CAMB-1B2DE7/2020|EPI_ISL_477792|2020-05-18	1
USA/WA-S937/2020|EPI_ISL_463427|2020-04-23																															Sweden/20-52052/2020|EPI_ISL_510870|2020-06-04	C211T		England/CAMB-79B01/2020|EPI_ISL_433824|2020-03-26	1
USA/WA-S929/2020|EPI_ISL_463419|2020-04-23																															Sweden/20-51746/2020|EPI_ISL_510843|2020-05-22	C211T		Sweden/20-51317/2020|EPI_ISL_455105|2020-05-07	1
USA/WA-S921/2020|EPI_ISL_463411|2020-04-25																															Russia/StPetersburg-RII9304V/2020|EPI_ISL_507295|2020-04-24	C211T		USA/CA-CZB-1171/2020|EPI_ISL_454624|2020-04-30	1
USA/WA-S913/2020|EPI_ISL_463403|2020-04-27																															USA/MI-MDHHS-SC21161/2020|EPI_ISL_507418|2020-07-01	C211T		Croatia/14412_Koprivnica/2020|EPI_ISL_454602|2020-04-21	1
England/NORT-291855/2020|EPI_ISL_453542|2020-04-22																															USA/WA-S1694/2020|EPI_ISL_496120|2020-05-31	C211T		England/BRIS-126AC9/2020|EPI_ISL_458970|2020-04-10	1
England/NORT-290AD8/2020|EPI_ISL_453533|2020-04-30																															India/IK60/2020|EPI_ISL_508386|2020-05-07	C211T		England/NORT-2972AC/2020|EPI_ISL_488079|2020-04-27	1
England/NORT-28A0FD/2020|EPI_ISL_453524|2020-04-08																															USA/CA-IGI-0067/2020|EPI_ISL_511821|2020-06-12	C211T		England/SHEF-CD3CA/2020|EPI_ISL_475455|2020-04-29	1
England/NORT-289F6A/2020|EPI_ISL_453520|2020-04-07																															USA/NM-NMDOH-2020219018/2020|EPI_ISL_510881|2020-07-17	C211T		England/CAMB-1B2D6F/2020|EPI_ISL_477791|2020-05-18	1
England/NORT-289AC3/2020|EPI_ISL_453511|2020-04-03																															USA/MI-MDHHS-SC21188/2020|EPI_ISL_507445|2020-07-06	C211T		Spain/COV001907/2020|EPI_ISL_467072|2020-03-16	1
England/NORT-28952C/2020|EPI_ISL_453503|2020-03-30																															England/NOTT-10F659/2020|EPI_ISL_433031|2020-04-03	C212T		USA/WA-S365/2020|EPI_ISL_434125|2020-03-10	1
England/NORT-288EE6/2020|EPI_ISL_453495|2020-03-25																															England/CAMB-1B2C17/2020|EPI_ISL_456714|2020-05-18	C212T		England/CAMB-1B2989/2020|EPI_ISL_456706|2020-05-18	1
England/NORT-288D25/2020|EPI_ISL_453486|2020-03-20																															USA/NY-NYUMC484/2020|EPI_ISL_435549|2020-04-24	C212T		USA/CA-CZB-1178/2020|EPI_ISL_454628|2020-04-30	1
England/LIVE-9F473/2020|EPI_ISL_453457|2020-05-01																															Wales/PHWC-15E169/2020|EPI_ISL_472797|2020-05-16	C212T		Wales/PHWC-15E178/2020|EPI_ISL_472798|2020-05-13	1
England/LIVE-9F349/2020|EPI_ISL_453449|2020-05-01																															Wales/PHWC-15E7EF/2020|EPI_ISL_472832|2020-05-16	C212T		England/CAMB-1B2D41/2020|EPI_ISL_477790|2020-05-18	1
England/LIVE-9F26A/2020|EPI_ISL_453441|2020-05-03																															USA/CA-CZB-1179/2020|EPI_ISL_454629|2020-04-30	C212T		USA/WA-UW-1588/2020|EPI_ISL_423012|2020-03-19	1
England/LIVE-9F121/2020|EPI_ISL_453432|2020-05-05																															England/CAMB-77D0D/2020|EPI_ISL_440829|2020-04-01	C212T		Spain/COV001098/2020|EPI_ISL_452589|2020-03-29	1
USA/CT-Yale-113/2020|EPI_ISL_428752|2020-04-09																															England/CAMB-1B2DE7/2020|EPI_ISL_477792|2020-05-18	C212T		India/S21/2020|EPI_ISL_455651|2020-04-21	1
USA/CT-Yale-019/2020|EPI_ISL_428740|2020-03-19																															England/CAMB-79B01/2020|EPI_ISL_433824|2020-03-26	C212T		England/BRIS-126ABA/2020|EPI_ISL_459084|2020-04-09	1
USA/WA-S621/2020|EPI_ISL_438174|2020-04-27																															Sweden/20-51317/2020|EPI_ISL_455105|2020-05-07	C212T		England/SHEF-C5966/2020|EPI_ISL_432806|2020-03-20	1
USA/WA-S613/2020|EPI_ISL_438166|2020-04-23																															USA/CA-CZB-1171/2020|EPI_ISL_454624|2020-04-30	C212T		England/CAMB-1B2D23/2020|EPI_ISL_477789|2020-05-18	1
USA/WA-S605/2020|EPI_ISL_438158|2020-04-18																															Croatia/14412_Koprivnica/2020|EPI_ISL_454602|2020-04-21	C212T		Brazil/L7_CD63/2020|EPI_ISL_476432|2020-03-22	1
USA/WA-S597/2020|EPI_ISL_438150|2020-04-13																															England/BRIS-126AC9/2020|EPI_ISL_458970|2020-04-10	C212T		USA/NY-NYUMC471/2020|EPI_ISL_435536|2020-04-20	1
USA/WA-S589/2020|EPI_ISL_438142|2020-04-04																															England/NORT-2972AC/2020|EPI_ISL_488079|2020-04-27	C212T		USA/CA-CZB-1156/2020|EPI_ISL_454617|2020-04-26	1
USA/NY-NYUMC280/2020|EPI_ISL_428794|2020-04-05																															England/SHEF-CD3CA/2020|EPI_ISL_475455|2020-04-29	C212T		England/NORT-295BD0/2020|EPI_ISL_478655|2020-04-03	1
USA/NY-NYUMC272/2020|EPI_ISL_428786|2020-04-06																															England/CAMB-1B2D6F/2020|EPI_ISL_477791|2020-05-18	C212T		England/CAMB-1B2C62/2020|EPI_ISL_477788|2020-05-18	1
USA/NY-NYUMC261/2020|EPI_ISL_428775|2020-04-05																															Spain/COV001907/2020|EPI_ISL_467072|2020-03-16	C212A		England/LOND-D5BC7/2020|EPI_ISL_444239|2020-04-17	1
USA/NY-NYUMC252/2020|EPI_ISL_428766|2020-04-03																															USA/WA-S365/2020|EPI_ISL_434125|2020-03-10	C212T		England/CAMB-1B2BFC/2020|EPI_ISL_456712|2020-05-18	1
Canada/BC_24225776/2020|EPI_ISL_463199|2020-03																															England/CAMB-1B2989/2020|EPI_ISL_456706|2020-05-18	C212T		Brazil/L9_CD91/2020|EPI_ISL_476490|2020-03-24	1
Canada/BC_24044059/2020|EPI_ISL_463191|2020-03																															USA/CA-CZB-1178/2020|EPI_ISL_454628|2020-04-30	C212T		Spain/Donostia-San_Sebastian_COV003224/2020|EPI_ISL_480992|2020-03-14	1
England/PORT-2CF3A8/2020|EPI_ISL_453672|2020-04-28																															Wales/PHWC-15E178/2020|EPI_ISL_472798|2020-05-13	C212T		England/NORW-E8262/2020|EPI_ISL_449130|2020-04-08	1
England/NOTT-1113D5/2020|EPI_ISL_453658|2020-05-15																															England/CAMB-1B2D41/2020|EPI_ISL_477790|2020-05-18	C212T		England/NORW-EA093/2020|EPI_ISL_461854|2020-05-18	1
England/NOTT-11134E/2020|EPI_ISL_453649|2020-05-12																															USA/WA-UW-1588/2020|EPI_ISL_423012|2020-03-19	C212T		USA/CA-CZB-1520/2020|EPI_ISL_468466|2020-05-11	1
USA/WA-S644/2020|EPI_ISL_438197|2020-04-17																															Spain/COV001098/2020|EPI_ISL_452589|2020-03-29	C212T		England/BRIS-1236E6/2020|EPI_ISL_442731|2020-04-06	1
USA/WA-S636/2020|EPI_ISL_438189|2020-04-17																															India/S21/2020|EPI_ISL_455651|2020-04-21	C212T		England/CAMB-1B2C44/2020|EPI_ISL_477787|2020-05-18	1
USA/WA-S628/2020|EPI_ISL_438181|2020-04-18																															England/BRIS-126ABA/2020|EPI_ISL_459084|2020-04-09	C212T		England/CAMB-1B235E/2020|EPI_ISL_456679|2020-05-18	1
England/200960515/2020|EPI_ISL_414009|2020-02-25																															England/SHEF-C5966/2020|EPI_ISL_432806|2020-03-20	C212T		England/CAMB-1B2BDE/2020|EPI_ISL_456710|2020-05-18	1
England/PORT-2CF469/2020|EPI_ISL_453683|2020-04-27																															England/CAMB-1B2D23/2020|EPI_ISL_477789|2020-05-18	C212T		England/20180032504/2020|EPI_ISL_465437|2020-04-27	1
England/PORT-2CF3D5/2020|EPI_ISL_453675|2020-04-28																															Brazil/L7_CD63/2020|EPI_ISL_476432|2020-03-22	C212T		Spain/Madrid_LP10_12/2020|EPI_ISL_417969|2020-03-09	1
England/NOTT-11129C/2020|EPI_ISL_453640|2020-04-23																															USA/NY-NYUMC471/2020|EPI_ISL_435536|2020-04-20	C212T		England/BRIS-126CB4/2020|EPI_ISL_459072|2020-04-10	1
England/NOTT-111126/2020|EPI_ISL_453632|2020-05-02																															USA/CA-CZB-1156/2020|EPI_ISL_454617|2020-04-26	C212T		Scotland/CVR2615/2020|EPI_ISL_484616|2020-04-15	1
England/NOTT-111092/2020|EPI_ISL_453624|2020-05-07																															England/NORT-295BD0/2020|EPI_ISL_478655|2020-04-03	C212T		England/CAMB-1AAE0D/2020|EPI_ISL_470326|2020-04-19	1
England/NOTT-110FF0/2020|EPI_ISL_453614|2020-05-04																															England/CAMB-1B2C62/2020|EPI_ISL_477788|2020-05-18	C212T		England/CAMB-7B2CE/2020|EPI_ISL_433938|2020-04-12	1
Scotland/CVR03/2020|EPI_ISL_414025|2020-03-01																															England/LOND-D5BC7/2020|EPI_ISL_444239|2020-04-17	C212T		USA/CA-CZB077/2020|EPI_ISL_428996|2020-03-28	1
Scotland/CVR2088/2020|EPI_ISL_473510|2020-05-04																															England/CAMB-1B2BFC/2020|EPI_ISL_456712|2020-05-18	C212T		England/CAMB-1B2330/2020|EPI_ISL_456678|2020-05-18	1
England/PORT-2CF584/2020|EPI_ISL_453693|2020-05-02																															Brazil/L9_CD91/2020|EPI_ISL_476490|2020-03-24	C212T		USA/CA-CZB-1183/2020|EPI_ISL_454630|2020-04-30	1
England/OXON-AD858/2020|EPI_ISL_448599|2020																															Spain/Donostia-San_Sebastian_COV003224/2020|EPI_ISL_480992|2020-03-14	C212T		Wales/PHWC-164E3C/2020|EPI_ISL_479387|2020-06-06	1
England/OXON-AD71F/2020|EPI_ISL_448591|2020																															England/NORW-E8262/2020|EPI_ISL_449130|2020-04-08	C212T		Sweden/20-52074/2020|EPI_ISL_510873|2020-06-15	1
England/OXON-AD490/2020|EPI_ISL_448581|2020																															England/NORW-EA093/2020|EPI_ISL_461854|2020-05-18	C212T		USA/WA-S1919/2020|EPI_ISL_497348|2020-06-02	1
England/OXON-ACD2D/2020|EPI_ISL_448531|2020-04-06																															USA/CA-CZB-1520/2020|EPI_ISL_468466|2020-05-11	C212T		Brazil/PE-IAM39/2020|EPI_ISL_500481|2020-04-08	1
England/OXON-ACC99/2020|EPI_ISL_448523|2020-04-05																															England/BRIS-1236E6/2020|EPI_ISL_442731|2020-04-06	C212T		India/IK19/2020|EPI_ISL_508348|2020-04-24	1
England/OXON-ACBAB/2020|EPI_ISL_448515|2020-04-06																															England/CAMB-1B2C44/2020|EPI_ISL_477787|2020-05-18	C212T		USA/CA-ALSR-1398/2020|EPI_ISL_494584|2020-05-05	1
England/OXON-ACADB/2020|EPI_ISL_448507|2020-04-05																															England/CAMB-1B235E/2020|EPI_ISL_456679|2020-05-18	C212T		Northern_Ireland/NIRE-10650A/2020|EPI_ISL_500962|2020-05-04	1
Iceland/558/2020|EPI_ISL_424578|2020-03-27																															England/CAMB-1B2BDE/2020|EPI_ISL_456710|2020-05-18	C212T		Guangzhou/GZMU0030/2020|EPI_ISL_414686|2020-02-27	1
Iceland/548/2020|EPI_ISL_424568|2020-03-28																															England/20180032504/2020|EPI_ISL_465437|2020-04-27	C212T		England/CAMB-7DAB5/2020|EPI_ISL_441745|2020-04-06	1
Iceland/540/2020|EPI_ISL_424560|2020-03-27																															Spain/Madrid_LP10_12/2020|EPI_ISL_417969|2020-03-09	C212T		Switzerland/120055/2020|EPI_ISL_468236|2020-04-20	1
Iceland/530/2020|EPI_ISL_424551|2020-03-25																															England/BRIS-126CB4/2020|EPI_ISL_459072|2020-04-10	C212T		England/CAMB-7DA79/2020|EPI_ISL_441725|2020-04-06	1
Iceland/520/2020|EPI_ISL_424541|2020-03																															Scotland/CVR2615/2020|EPI_ISL_484616|2020-04-15	C212T		England/20144049804/2020|EPI_ISL_423545|2020-03-31	1
Iceland/511/2020|EPI_ISL_424533|2020-03-20																															England/CAMB-1AAE0D/2020|EPI_ISL_470326|2020-04-19	C212T		Israel/2046616/2020|EPI_ISL_447401|2020-04-02	1
Iceland/503/2020|EPI_ISL_424525|2020-03-21																															England/CAMB-7B2CE/2020|EPI_ISL_433938|2020-04-12	C212T		England/CAMB-7DB58/2020|EPI_ISL_441724|2020-04-06	1
Iceland/495/2020|EPI_ISL_424517|2020-03-21																															USA/CA-CZB077/2020|EPI_ISL_428996|2020-03-28	C212T		England/CAMB-81377/2020|EPI_ISL_442597|2020-04-11	1
Iceland/487/2020|EPI_ISL_424509|2020-03-20																															England/CAMB-1B2330/2020|EPI_ISL_456678|2020-05-18	C212T		England/CAMB-7F7CB/2020|EPI_ISL_470393|2020-04-08	1
Iceland/478/2020|EPI_ISL_424501|2020-03-20																															USA/CA-CZB-1183/2020|EPI_ISL_454630|2020-04-30	C212T		England/CAMB-7C88F/2020|EPI_ISL_470531|2020-04-05	1
Scotland/CVR2725/2020|EPI_ISL_473546|2020-04-18																															Wales/PHWC-164E3C/2020|EPI_ISL_479387|2020-06-06	C212T		England/20139008404/2020|EPI_ISL_421864|2020-03-27	1
Scotland/CVR2716/2020|EPI_ISL_473537|2020-04-18																															Sweden/20-52074/2020|EPI_ISL_510873|2020-06-15	C212T		Sichuan/SC-PHCC2-039/2020|EPI_ISL_451359|2020-01-27	1
Scotland/CVR2647/2020|EPI_ISL_473528|2020-04-16																															USA/WA-S1919/2020|EPI_ISL_497348|2020-06-02	C212T		England/NORW-E8235/2020|EPI_ISL_449127|2020-04-08	1
England/OXON-AD25A/2020|EPI_ISL_448572|2020																															Brazil/PE-IAM39/2020|EPI_ISL_500481|2020-04-08	C212T		England/NORW-E80C2/2020|EPI_ISL_449105|2020-04-08	1
England/OXON-AD0F6/2020|EPI_ISL_448563|2020																															India/IK19/2020|EPI_ISL_508348|2020-04-24	C212T		England/CAMB-7911E/2020|EPI_ISL_441130|2020-04-03	1
England/OXON-AD041/2020|EPI_ISL_448555|2020-04-07																															USA/CA-ALSR-1398/2020|EPI_ISL_494584|2020-05-05	C212T		England/20126104604/2020|EPI_ISL_423916|2020-03-18	1
England/OXON-ACEEE/2020|EPI_ISL_448546|2020-04-05																															Northern_Ireland/NIRE-10650A/2020|EPI_ISL_500962|2020-05-04	C212T		England/CAMB-7B668/2020|EPI_ISL_441208|2020-04-04	1
England/OXON-ACDB4/2020|EPI_ISL_448538|2020-04-04																															Guangzhou/GZMU0030/2020|EPI_ISL_414686|2020-02-27	G214T		England/CAMB-7C39D/2020|EPI_ISL_434035|2020-04-13	1
England/OXON-AC6AA/2020|EPI_ISL_448475|2020-04-07																															England/CAMB-7DAB5/2020|EPI_ISL_441745|2020-04-06	G214C		England/20142014504/2020|EPI_ISL_423430|2020-03-31	1
England/OXON-AC5F8/2020|EPI_ISL_448466|2020-04-06																															Switzerland/120055/2020|EPI_ISL_468236|2020-04-20	G214T		England/CAMB-7D262/2020|EPI_ISL_442123|2020-04-06	1
England/NOTT-110D7E/2020|EPI_ISL_448415|2020-04-12																															England/CAMB-7DA79/2020|EPI_ISL_441725|2020-04-06	G214C		England/CAMB-7BA02/2020|EPI_ISL_442245|2020-04-04	1
England/NOTT-110CCC/2020|EPI_ISL_448404|2020-05-01																															England/20144049804/2020|EPI_ISL_423545|2020-03-31	G214C		England/CAMB-792EE/2020|EPI_ISL_441203|2020-04-03	1
Iceland/589/2020|EPI_ISL_424609|2020-03-29																															Israel/2046616/2020|EPI_ISL_447401|2020-04-02	G214T		England/CAMB-794AC/2020|EPI_ISL_441133|2020-04-03	1
Iceland/580/2020|EPI_ISL_424600|2020-03-27																															England/CAMB-7DB58/2020|EPI_ISL_441724|2020-04-06	G214C		England/CAMB-7D772/2020|EPI_ISL_441657|2020-04-06	1
Iceland/571/2020|EPI_ISL_424591|2020-03-28																															England/CAMB-81377/2020|EPI_ISL_442597|2020-04-11	G214C		USA/FL-BPHL-0448/2020|EPI_ISL_495354|2020-03-19	1
Iceland/560/2020|EPI_ISL_424580|2020-03-27																															England/CAMB-7F7CB/2020|EPI_ISL_470393|2020-04-08	G214C		France/HF3290/2020|EPI_ISL_421509|2020-03-23	1
Iceland/427/2020|EPI_ISL_424451|2020-03-20																															England/CAMB-7C88F/2020|EPI_ISL_470531|2020-04-05	G214C		France/HF3138/2020|EPI_ISL_420056|2020-03-22	1
Iceland/419/2020|EPI_ISL_424443|2020-03-19																															England/20139008404/2020|EPI_ISL_421864|2020-03-27	G214C		France/HF2237/2020|EPI_ISL_416496|2020-03-10	1
Iceland/411/2020|EPI_ISL_424435|2020-03-19																															Sichuan/SC-PHCC2-039/2020|EPI_ISL_451359|2020-01-27	G214A		France/HF2946/2020|EPI_ISL_420049|2020-03-19	1
Iceland/403/2020|EPI_ISL_424427|2020-03-19																															England/NORW-E8235/2020|EPI_ISL_449127|2020-04-08	G214C		India/AR59/2020|EPI_ISL_508195|2020-06-03	1
Iceland/394/2020|EPI_ISL_424418|2020-03-19																															England/NORW-E80C2/2020|EPI_ISL_449105|2020-04-08	G214C		Portugal/PT1129/2020|EPI_ISL_511676|2020-04-01	1
Iceland/383/2020|EPI_ISL_424407|2020-03-19																															England/CAMB-7911E/2020|EPI_ISL_441130|2020-04-03	G214C		USA/WI-UW-660/2020|EPI_ISL_491347|2020-06-26	1
England/CAMB-1B4B45/2020|EPI_ISL_473499|2020-06-10																															England/20126104604/2020|EPI_ISL_423916|2020-03-18	G214C		Scotland/EDB4658/2020|EPI_ISL_449317|2020-05-08	1
England/CAMB-1B4A57/2020|EPI_ISL_473491|2020-06-08																															England/CAMB-7B668/2020|EPI_ISL_441208|2020-04-04	G214C		Scotland/EDB788/2020|EPI_ISL_433244|2020-04-04	1
England/CAMB-1B479C/2020|EPI_ISL_473483|2020-06-03																															England/CAMB-7C39D/2020|EPI_ISL_434035|2020-04-13	G214C		Wales/PHWC-323C0/2020|EPI_ISL_446641|2020-04-08	1
England/CAMB-1B44OE/2020|EPI_ISL_473475|2020-06-02																															England/20142014504/2020|EPI_ISL_423430|2020-03-31	G214C		Algeria/G0638_2264/2020|EPI_ISL_418241|2020-03-02	1
England/CAMB-1B42E6/2020|EPI_ISL_473467|2020-06-01																															England/CAMB-7D262/2020|EPI_ISL_442123|2020-04-06	G214C		Netherlands/Flevoland_5/2020|EPI_ISL_460638|2020-04-01	1
England/CAMB-1B4116/2020|EPI_ISL_473458|2020-06-01																															England/CAMB-7BA02/2020|EPI_ISL_442245|2020-04-04	G214C		England/OXON-AF962/2020|EPI_ISL_478788|2020	1
England/BIRM-61243/2020|EPI_ISL_473446|2020-06-06																															England/CAMB-792EE/2020|EPI_ISL_441203|2020-04-03	G214C		Scotland/EDB787/2020|EPI_ISL_433243|2020-04-03	1
England/BIRM-61164/2020|EPI_ISL_473434|2020-06-02																															England/CAMB-794AC/2020|EPI_ISL_441133|2020-04-03	G214C		USA/UT-01444/2020|EPI_ISL_452155|2020-04-10	1
England/BIRM-6050F/2020|EPI_ISL_473421|2020-05-27																															England/CAMB-7D772/2020|EPI_ISL_441657|2020-04-06	G214C		England/OXON-AF2C1/2020|EPI_ISL_448823|2020-03-24	1
England/BIRM-60411/2020|EPI_ISL_473408|2020-05-25																															USA/FL-BPHL-0448/2020|EPI_ISL_495354|2020-03-19	G214T		Scotland/EDB1897/2020|EPI_ISL_433156|2020-04-17	1
England/OXON-AEC88/2020|EPI_ISL_448775|2020-04-07																															France/HF3290/2020|EPI_ISL_421509|2020-03-23	A215G		England/OXON-AE5F6/2020|EPI_ISL_448706|2020	1
England/OXON-AEAD9/2020|EPI_ISL_448754|2020																															France/HF3138/2020|EPI_ISL_420056|2020-03-22	A215G		England/OXON-ADF44/2020|EPI_ISL_448648|2020	1
England/OXON-AE9FA/2020|EPI_ISL_448745|2020																															France/HF2237/2020|EPI_ISL_416496|2020-03-10	A215G		USA/WI-WSLH-200052/2020|EPI_ISL_471217|2020-04-06	1
England/OXON-AE963/2020|EPI_ISL_448737|2020																															France/HF2946/2020|EPI_ISL_420049|2020-03-19	A215G		Netherlands/NA_688/2020|EPI_ISL_461123|2020-03-30	1
England/OXON-AC90B/2020|EPI_ISL_448493|2020-04-06																															India/AR59/2020|EPI_ISL_508195|2020-06-03	A215T		Netherlands/Utrecht_44/2020|EPI_ISL_461242|2020-04-07	1
England/OXON-AC789/2020|EPI_ISL_448482|2020-04-07																															Portugal/PT1129/2020|EPI_ISL_511676|2020-04-01	A215C		Scotland/EDB2561/2020|EPI_ISL_439230|2020-04-24	1
England/OXON-AC4A0/2020|EPI_ISL_448454|2020-04-07																															USA/WI-UW-660/2020|EPI_ISL_491347|2020-06-26	T216C		Scotland/EDB1622/2020|EPI_ISL_433092|2020-04-13	1
England/NOTT-110FC3/2020|EPI_ISL_448446|2020-04-25																															Scotland/EDB4658/2020|EPI_ISL_449317|2020-05-08	C217T		Scotland/EDB1677/2020|EPI_ISL_433114|2020-04-15	1
England/NOTT-110F3C/2020|EPI_ISL_448438|2020-04-20																															Scotland/EDB788/2020|EPI_ISL_433244|2020-04-04	C217T		Iceland/243/2020|EPI_ISL_417571|2020-03-17	1
England/NOTT-110E7B/2020|EPI_ISL_448428|2020-04-29																															Wales/PHWC-323C0/2020|EPI_ISL_446641|2020-04-08	C217T		USA/UT-01314/2020|EPI_ISL_449812|2020-04-01	1
USA/WA-S378/2020|EPI_ISL_434138|2020-03-27																															Algeria/G0638_2264/2020|EPI_ISL_418241|2020-03-02	C217T		Australia/VIC275/2020|EPI_ISL_419968|2020-03-22	1
USA/WA-S370/2020|EPI_ISL_434130|2020-03-28																															Netherlands/Flevoland_5/2020|EPI_ISL_460638|2020-04-01	C217T		India/NIV-QA-709/2020|EPI_ISL_452214|2020-04-07	1
USA/WA-S351/2020|EPI_ISL_434111|2020-03-25																															England/OXON-AF962/2020|EPI_ISL_478788|2020	C217T		England/BRIS-122025/2020|EPI_ISL_440038|2020-03-20	1
USA/WA-S343/2020|EPI_ISL_434103|2020-04-02																															Scotland/EDB787/2020|EPI_ISL_433243|2020-04-03	C217T		Austria/CeMM0321/2020|EPI_ISL_475792|2020-03-31	1
Iceland/472/2020|EPI_ISL_424495|2020-03-20																															USA/UT-01444/2020|EPI_ISL_452155|2020-04-10	C217T		Netherlands/Gelderland_50/2020|EPI_ISL_460950|2020-05-17	1
Iceland/464/2020|EPI_ISL_424487|2020-03-20																															England/OXON-AF2C1/2020|EPI_ISL_448823|2020-03-24	C217T		Netherlands/NoordBrabant_146/2020|EPI_ISL_461181|2020-04-05	1
Iceland/456/2020|EPI_ISL_424479|2020-03-20																															Scotland/EDB1897/2020|EPI_ISL_433156|2020-04-17	C217T		USA/NE-10760/2020|EPI_ISL_475178|2020-05-04	1
Iceland/447/2020|EPI_ISL_424471|2020-03-20																															England/OXON-AE5F6/2020|EPI_ISL_448706|2020	C217T		England/CAMB-71C60/2020|EPI_ISL_439607|2020-03-31	1
[truncated: 80,359 more rows]
